# Supplementary material for: HY5 Contributes to Light-Regulated Root System Architecture Under a Root-Covered Culture System
Source: Front Plant Sci. 2019 Nov 28;10:1490. doi: 10.3389/fpls.2019.01490 (PMC6892842; doi:10.3389/fpls.2019.01490)
Supplement: Table S1 — Upregulated and downregulated genes in dark-grown hy5 and WT roots and illuminated hy5 roots compared to the illuminated WT roots. [file Table_1.xlsx]

## Sheet: WT-covered
Supplemental Table S1 Up-regulated and down-regulated genes in hy5- covered, hy5-illuminated and WT-covered compared to the WT-illuminated
geneID	baseMean	WT-covered_baseMean	WT-illuminated_baseMean	log2FoldChange	pval	padj	bDiff	gene length	gene name	description
AT2G34630	1548.39	1269.43	1827.35	-0.525569	0.00107326	0.0111805	down	1589	SPS3	Solanesyl diphosphate synthase 3, chloroplastic/mitochondrial [Source:UniProtKB/Swiss-Prot;Acc:Q5HZ00]
AT5G25130	19.777	9.61377	29.9402	-1.63891	0.00314426	0.0277101	down	1759	CYP71B12	Cytochrome P450 71B12 [Source:UniProtKB/Swiss-Prot;Acc:Q9ZU07]
AT2G40840	1633.64	1185.37	2081.91	-0.812571	5.9e-07	1.28e-05	down	3409	DPE2	4-alpha-glucanotransferase DPE2 [Source:UniProtKB/Swiss-Prot;Acc:Q8RXD9]
AT4G09750	622.107	146.436	1097.78	-2.90624	5.54e-19	4.09e-17	down	1232		NAD(P)-binding Rossmann-fold superfamily protein [Source:UniProtKB/TrEMBL;Acc:Q9SZ91]
AT5G53970	321.484	182.736	460.233	-1.33261	1.94e-11	7.52e-10	down	1665		Probable aminotransferase TAT2 [Source:UniProtKB/Swiss-Prot;Acc:Q9FN30]
AT4G29270	3947.86	3299.5	4596.22	-0.478201	0.00236047	0.0218021	down	991		Acid phosphatase-like protein [Source:UniProtKB/TrEMBL;Acc:Q9M0F4]
AT3G04260	349.451	254.785	444.117	-0.80166	3.41e-05	0.000534023	down	3082	PTAC3	Plastid transcriptionally active 3 [Source:UniProtKB/TrEMBL;Acc:F4J3M2]
AT3G16140	89.3594	4.33717	174.382	-5.32935	4.64e-42	1.2e-39	down	1300	PSAH1	Photosystem I reaction center subunit VI-1, chloroplastic [Source:UniProtKB/Swiss-Prot;Acc:Q9SUI7]
AT2G01320	314.99	157.971	472.008	-1.57915	1.18e-14	6.21e-13	down	2611		ABCG7 [Source:UniProtKB/TrEMBL;Acc:A0A178VSW5]
AT2G47840	813.289	641.62	984.958	-0.618342	0.000356958	0.00434253	down	815	TIC20-II	Tic20-II [Source:UniProtKB/TrEMBL;Acc:A0A178VYR0]
AT2G21960	228.306	33.3997	423.213	-3.66348	1.03e-21	9.17e-20	down	1280		Expressed protein [Source:UniProtKB/TrEMBL;Acc:Q9SJ03]
AT4G20130	267.187	177.348	357.025	-1.00945	1.77e-05	0.000293754	down	1664	PTAC14	Protein PLASTID TRANSCRIPTIONALLY ACTIVE 14 [Source:UniProtKB/Swiss-Prot;Acc:Q84JF5]
AT3G10450	256.936	77.2048	436.667	-2.49977	4.81e-14	2.4e-12	down	1681	SCPL7	SCPL7 [Source:UniProtKB/TrEMBL;Acc:A0A178VAE4]
AT4G13530	1842.02	1417.86	2266.18	-0.676548	0.00369515	0.0316517	down	1456		Transmembrane protein [Source:UniProtKB/TrEMBL;Acc:Q67ZR8]
AT3G47070	120.493	16.0043	224.982	-3.81328	2.56e-36	5.24e-34	down	1142		Thylakoid soluble phosphoprotein [Source:UniProtKB/TrEMBL;Acc:Q9SD66]
AT2G26500	218.985	11.2715	426.699	-5.24247	7.62e-74	6.57e-71	down	667		At2g26500/T9J22.17 [Source:UniProtKB/TrEMBL;Acc:O48717]
AT2G38465	143.844	74.4515	213.236	-1.51808	3.16e-05	0.000498993	down	563		Expressed protein [Source:UniProtKB/TrEMBL;Acc:Q8S8P4]
AT1G52000	10.4759	1.96163	18.9901	-3.27512	0.000105276	0.00147931	down	2567	JAL5	Jacalin-related lectin 5 [Source:UniProtKB/Swiss-Prot;Acc:Q9ZU23]
AT1G62750	1483.94	373.694	2594.19	-2.79536	1.66e-17	1.08e-15	down	2666	CPEFG	Elongation factor G, chloroplastic [Source:UniProtKB/Swiss-Prot;Acc:Q9SI75]
AT5G53830	312.893	228.992	396.793	-0.793093	4.16e-05	0.000641127	down	1155	VQ33	VQ motif-containing protein 33 [Source:UniProtKB/Swiss-Prot;Acc:Q9FHZ3]
AT2G02100	8790.88	5043.71	12538.1	-1.31376	3.14e-16	1.88e-14	down	753	PDF2.2	PDF2.2 [Source:UniProtKB/TrEMBL;Acc:A0A178VVN9]
AT1G71500	413.531	108.715	718.346	-2.72413	1.46e-40	3.47e-38	down	1242		Rieske (2Fe-2S) domain-containing protein [Source:UniProtKB/TrEMBL;Acc:Q9C9I7]
AT4G37930	1191.93	464.362	1919.5	-2.0474	2e-31	3.16e-29	down	1989	SHM1	Serine hydroxymethyltransferase 1, mitochondrial [Source:UniProtKB/Swiss-Prot;Acc:Q9SZJ5]
AT1G66830	36.2929	18.5356	54.0503	-1.544	0.0017707	0.0170342	down	2963		Probable inactive leucine-rich repeat receptor-like protein kinase At1g66830 [Source:UniProtKB/Swiss-Prot;Acc:Q9C9N5]
AT2G20260	172.676	19.4958	325.856	-4.063	2.45e-48	8.07e-46	down	607	PSAE2	Photosystem I reaction center subunit IV B, chloroplastic [Source:UniProtKB/Swiss-Prot;Acc:Q9S714]
AT5G43630	1738.3	719.597	2757.01	-1.93785	1.03e-31	1.64e-29	down	3202	TZP	Zinc knuckle (CCHC-type) family protein [Source:UniProtKB/TrEMBL;Acc:Q9FIX7]
AT4G26050	31.0614	16.4271	45.6957	-1.47598	0.000818861	0.00885488	down	1772	PIRL8	Plant intracellular Ras-group-related LRR protein 8 [Source:UniProtKB/Swiss-Prot;Acc:Q8RWE5]
AT3G23790	228.021	176.831	279.212	-0.658992	0.00240526	0.0221422	down	2716	AAE16	Probable acyl-activating enzyme 16, chloroplastic [Source:UniProtKB/Swiss-Prot;Acc:Q9LK39]
AT1G78750	13.7036	3.25892	24.1483	-2.88946	3.16e-05	0.000498759	down	1746		F-box/FBD/LRR-repeat protein At1g78750 [Source:UniProtKB/Swiss-Prot;Acc:Q9ZV93]
AT4G30825	157.554	122.645	192.463	-0.650098	0.00513893	0.0417186	down	3118		Pentatricopeptide repeat-containing protein At4g30825, chloroplastic [Source:UniProtKB/Swiss-Prot;Acc:O65567]
AT3G07670	276.087	135.627	416.548	-1.61884	5.36e-14	2.65e-12	down	2090		Putative ribulose-1,5-bisphosphate carboxylase/oxygenase small subunit N-methyltransferase I [Source:UniProtKB/TrEMBL;Acc:Q9S7D2]
AT2G46420	383.243	58.656	707.829	-3.59305	5.88e-29	8.31e-27	down	2221		At2g46420/F11C10.11 [Source:UniProtKB/TrEMBL;Acc:Q9SKD8]
AT5G64130	2833.9	2244.63	3423.17	-0.608855	0.00432229	0.0360364	down	821		AT5G64130 protein [Source:UniProtKB/TrEMBL;Acc:A8MS32]
AT4G33030	494.588	404.259	584.916	-0.532949	0.00368704	0.0316148	down	1909	SQD1	UDP-sulfoquinovose synthase, chloroplastic [Source:UniProtKB/Swiss-Prot;Acc:O48917]
AT4G05180	227.083	23.2634	430.902	-4.21123	2.99e-58	1.59e-55	down	1115	PSBQ2	Oxygen-evolving enhancer protein 3-2, chloroplastic [Source:UniProtKB/Swiss-Prot;Acc:Q41932]
AT1G58848	3.33679	0	6.67358	#NAME?	0.00314686	0.0277145	down	3957	RF9	Probable disease resistance protein RDL6 [Source:UniProtKB/Swiss-Prot;Acc:P0DI18]
AT4G08920	1385.95	1080.91	1691	-0.645621	0.00401604	0.0338783	down	3018	CRY1	Cryptochrome-1 [Source:UniProtKB/Swiss-Prot;Acc:Q43125]
AT5G15970	1379.15	183.48	2574.82	-3.81078	1.38e-37	2.97e-35	down	750	KIN2	KIN2 [Source:UniProtKB/TrEMBL;Acc:A0A384KRF8]
AT2G41370	223.17	125.42	320.92	-1.35545	2.04e-10	7.19e-09	down	2174	NPR5	Regulatory protein NPR5 [Source:UniProtKB/Swiss-Prot;Acc:Q9ZVC2]
AT3G47620	1421.44	1037.84	1805.04	-0.798452	7.13e-05	0.00104817	down	2467	TCP14	Transcription factor TCP14 [Source:UniProtKB/Swiss-Prot;Acc:Q93Z00]
AT5G01930	451.984	369.525	534.444	-0.532366	0.00418646	0.0350441	down	1489	MAN6	Mannan endo-1,4-beta-mannosidase 6 [Source:UniProtKB/Swiss-Prot;Acc:Q9LZV3]
AT5G40390	3444.36	2456.61	4432.11	-0.851325	6.06e-08	1.53e-06	down	2991	RFS5	Probable galactinol--sucrose galactosyltransferase 5 [Source:UniProtKB/Swiss-Prot;Acc:Q9FND9]
AT1G16850	127.114	75.4511	178.778	-1.24455	4.77e-07	1.06e-05	down	894		At1g16880 [Source:UniProtKB/TrEMBL;Acc:Q9FE54]
AT1G35720	19990	13728.5	26251.5	-0.935222	7.18e-10	2.39e-08	down	1390	ANN1	Annexin [Source:UniProtKB/TrEMBL;Acc:A0A178WGZ8]
AT1G23740	79.6227	6.23429	153.011	-4.61727	9.17e-34	1.63e-31	down	1471	AOR	NADPH-dependent alkenal/one oxidoreductase, chloroplastic [Source:UniProtKB/Swiss-Prot;Acc:Q9ZUC1]
AT5G19040	429.995	348.235	511.754	-0.555386	0.00351431	0.0303941	down	1729	IPT5	Adenylate isopentenyltransferase 5, chloroplastic [Source:UniProtKB/Swiss-Prot;Acc:Q94ID2]
AT5G16540	288.677	132.345	445.009	-1.74954	1.07e-17	7.13e-16	down	1659	ZFN3	Zinc finger CCCH domain-containing protein 57 [Source:UniProtKB/Swiss-Prot;Acc:Q8L7N8]
AT1G15980	12.8005	0.331537	25.2695	-6.25208	1.17e-05	0.000201207	down	1719	PNSB1	Photosynthetic NDH subunit of subcomplex B 1, chloroplastic [Source:UniProtKB/Swiss-Prot;Acc:Q9S9N6]
AT5G24770	3883.05	1202.83	6563.27	-2.44798	3.63e-42	9.45e-40	down	1465	VSP2	Vegetative storage protein 2 [Source:UniProtKB/Swiss-Prot;Acc:O82122]
AT3G16520	529.09	236.561	821.619	-1.79625	8.81e-08	2.17e-06	down	1977	UGT88A1	UDP-glycosyltransferase 88A1 [Source:UniProtKB/Swiss-Prot;Acc:Q9LK73]
AT3G63490	677.619	391.834	963.404	-1.2979	5.69e-13	2.58e-11	down	1437	RPL1	50S ribosomal protein L1, chloroplastic [Source:UniProtKB/Swiss-Prot;Acc:Q9LY66]
AT1G52870	261.066	34.1205	488.011	-3.8382	3.93e-12	1.65e-10	down	1576		At1g52870/F14G24_14 [Source:UniProtKB/TrEMBL;Acc:Q9C933]
AT5G60850	801.321	510.722	1091.92	-1.09626	0.00124764	0.0126443	down	1873	DOF5.4	OBP4 [Source:UniProtKB/TrEMBL;Acc:A0A178UF84]
AT5G08650	461.303	308.476	614.131	-0.993388	6.99e-08	1.75e-06	down	2582		Translation factor GUF1 homolog, chloroplastic [Source:UniProtKB/TrEMBL;Acc:A0A178USI8]
AT3G10160	753.782	602.305	905.259	-0.587836	0.000673731	0.00745273	down	2427	FPGS2	Folylpolyglutamate synthase [Source:UniProtKB/Swiss-Prot;Acc:F4J2K2]
AT3G01590	1110.98	901.397	1320.57	-0.550924	0.00130263	0.0130901	down	1577		Glucose-6-phosphate 1-epimerase [Source:UniProtKB/TrEMBL;Acc:Q9SS96]
AT2G39140	250.835	199.441	302.229	-0.599681	0.00396311	0.0335174	down	1449	SVR1	Putative ribosomal large subunit pseudouridine synthase SVR1, chloroplastic [Source:UniProtKB/Swiss-Prot;Acc:Q8L960]
AT3G43670	1848.62	1383.32	2313.93	-0.74221	4.81e-06	8.88e-05	down	2391		Amine oxidase [Source:UniProtKB/TrEMBL;Acc:Q9M2B9]
AT3G45780	918.94	576.676	1261.2	-1.12897	6.72e-11	2.48e-09	down	3450	PHOT1	RPT1 [Source:UniProtKB/TrEMBL;Acc:A0A178VFT4]
AT3G04420	130.597	17.392	243.801	-3.80921	4.79e-39	1.09e-36	down	1224	anac048	AT3g04420/T27C4_6 [Source:UniProtKB/TrEMBL;Acc:Q8W4R4]
AT1G78490	129.558	25.7114	233.404	-3.18235	4.95e-06	9.12e-05	down	3256	CYP708A3	CYP708A3 [Source:UniProtKB/TrEMBL;Acc:A0A178WMR8]
AT2G04090	522.076	386.653	657.498	-0.765944	0.000128226	0.00175161	down	1805	DTX5	Protein DETOXIFICATION 5 [Source:UniProtKB/Swiss-Prot;Acc:Q9SIA1]
AT1G55490	1955.51	1341.04	2569.98	-0.938399	6.31e-09	1.84e-07	down	2276	CPN60B1	LEN1 [Source:UniProtKB/TrEMBL;Acc:A0A178W724]
AT2G46580	264.888	208.706	321.07	-0.621414	0.00268674	0.0243305	down	975	PPOX2	Pyridoxine/pyridoxamine 5'-phosphate oxidase 2 [Source:UniProtKB/Swiss-Prot;Acc:Q9ZPY1]
AT2G47180	1474.35	992.654	1956.05	-0.978579	6.86e-05	0.00101272	down	1392	GOLS1	Galactinol synthase 1 [Source:UniProtKB/Swiss-Prot;Acc:O22893]
AT3G54210	653.733	429.906	877.559	-1.02947	1.88e-08	5.15e-07	down	997	RPL17	50S ribosomal protein L17, chloroplastic [Source:UniProtKB/Swiss-Prot;Acc:Q9M385]
AT2G36885	408.375	267.405	549.345	-1.03869	3.71e-08	9.74e-07	down	1000		Expressed protein [Source:UniProtKB/TrEMBL;Acc:Q8S8F1]
AT2G37130	14348.5	9725.3	18971.6	-0.964027	0.00458289	0.0377934	down	1358	PER21	Peroxidase 21 [Source:UniProtKB/Swiss-Prot;Acc:Q42580]
AT1G73885	339.904	88.7675	591.039	-2.73515	1.87e-10	6.65e-09	down	579		unknown protein; FUNCTIONS IN: molecular_function unknown; INVOLVED IN: biological_process unknown; LOCATED IN: chloroplast thylakoid membrane, chloroplast; Ha. [Source:TAIR;Acc:AT1G73885]
AT5G14700	150.039	97.0725	203.006	-1.06439	0.000221999	0.00285776	down	1661		Cinnamoyl CoA reductase-like protein [Source:UniProtKB/TrEMBL;Acc:Q9LYJ0]
AT1G25440	146.888	4.05148	289.724	-6.16009	2.06e-10	7.25e-09	down	1737	COL16	Zinc finger protein CONSTANS-LIKE 16 [Source:UniProtKB/Swiss-Prot;Acc:Q8RWD0]
AT3G46780	112.17	2.38486	221.954	-6.54021	2.67e-21	2.31e-19	down	1865	PTAC16	Protein PLASTID TRANSCRIPTIONALLY ACTIVE 16, chloroplastic [Source:UniProtKB/Swiss-Prot;Acc:Q9STF2]
AT1G29910	10.7499	1.87887	19.621	-3.38447	0.000187186	0.00245382	down	1223	LHCB1.1	Chlorophyll a-b binding protein 3, chloroplastic [Source:UniProtKB/Swiss-Prot;Acc:Q8VZ87]
AT3G55290	458.285	262.976	653.593	-1.31346	0.000135999	0.00185172	down	1145		NAD(P)-binding Rossmann-fold superfamily protein [Source:UniProtKB/TrEMBL;Acc:Q94AL3]
AT2G23390	557.377	354.634	760.121	-1.0999	2.11e-06	4.15e-05	down	1853		Acyl-CoA [Source:UniProtKB/TrEMBL;Acc:O80456]
AT3G55120	4018.43	35.571	8001.29	-7.81339	9.03e-30	1.33e-27	down	1112	CHI1	Chalcone--flavonone isomerase 1 [Source:UniProtKB/Swiss-Prot;Acc:P41088]
AT2G21730	3.8218	0	7.64361	#NAME?	0.00207448	0.0195284	down	1809	CAD2	Cinnamyl alcohol dehydrogenase 2 [Source:UniProtKB/Swiss-Prot;Acc:Q9SJ25]
AT4G22990	59.386	27.4044	91.3676	-1.73728	9.09e-05	0.00129954	down	2563		Major Facilitator Superfamily with SPX (SYG1/Pho81/XPR1) domain-containing protein [Source:UniProtKB/TrEMBL;Acc:F4JMQ7]
AT1G51110	30.8933	5.35091	56.4357	-3.39875	2.37e-11	9.08e-10	down	1490	PAP12	Probable plastid-lipid-associated protein 12, chloroplastic [Source:UniProtKB/Swiss-Prot;Acc:Q8LAP6]
AT4G27820	112.536	60.7871	164.285	-1.43437	8.19e-08	2.03e-06	down	1779	BGLU9	Beta-glucosidase 9 [Source:UniProtKB/Swiss-Prot;Acc:Q9STP4]
AT5G11260	1579.74	775.962	2383.52	-1.61904	2.94e-20	2.38e-18	down	1094	HY5	Basic-leucine zipper (bZIP) transcription factor family protein [Source:TAIR;Acc:AT5G11260]
AT5G59960	1978.88	1570.55	2387.2	-0.604047	0.00489151	0.0399643	down	1811		unknown protein; FUNCTIONS IN: molecular_function unknown; INVOLVED IN: biological_process unknown; LOCATED IN: nucleus; EXPRESSED IN: 24 plant structures; EXPRESSED DURING: 15 growth stages; Ha. [Source:TAIR;Acc:AT5G59960]
AT2G35450	277.882	214.865	340.899	-0.665915	0.00116968	0.0120049	down	1825		Catalytic/ hydrolase [Source:UniProtKB/TrEMBL;Acc:Q682E0]
AT4G09650	326.104	162.62	489.587	-1.59006	1.39e-15	7.88e-14	down	1151	ATPD	PDE332 [Source:UniProtKB/TrEMBL;Acc:A0A178V1L3]
AT4G30993	287.864	223.56	352.168	-0.655599	0.00100227	0.0105375	down	1899		Calcineurin-like metallo-phosphoesterase superfamily protein [Source:UniProtKB/TrEMBL;Acc:Q8GW42]
AT2G02450	4.39907	0	8.79815	#NAME?	0.000504998	0.00580469	down	1869	NAC035	NAC domain-containing protein 35 [Source:UniProtKB/Swiss-Prot;Acc:Q9ZVP8]
AT4G06744	4416.18	3465.9	5366.45	-0.630735	4.24e-05	0.000651468	down	1922		Uncharacterized protein At4g06744 [Source:UniProtKB/Swiss-Prot;Acc:Q8W3M4]
AT2G45630	113.451	67.6152	159.287	-1.23621	4.59e-06	8.5e-05	down	1144		D-isomer specific 2-hydroxyacid dehydrogenase family protein [Source:UniProtKB/TrEMBL;Acc:Q67Y01]
AT4G34190	262.019	70.2764	453.761	-2.69082	4.65e-22	4.24e-20	down	939	2019-09-01	Stress enhanced protein 1, chloroplastic [Source:UniProtKB/Swiss-Prot;Acc:Q9M7I9]
AT3G16770	1792.33	776.591	2808.06	-1.85435	0.00025068	0.00320225	down	1306	RAP2-3	Ethylene-responsive transcription factor RAP2-3 [Source:UniProtKB/Swiss-Prot;Acc:P42736]
AT5G41590	60.6566	36.9171	84.396	-1.19288	0.000271561	0.00342885	down	917		Protein LURP-one-related 17 [Source:UniProtKB/Swiss-Prot;Acc:A0MFL4]
AT1G32160	307.685	243.782	371.589	-0.608116	0.0026156	0.0237723	down	1465		At1g32160/F3C3_6 [Source:UniProtKB/TrEMBL;Acc:Q9FVR1]
AT5G42240	351.339	259.719	442.959	-0.77022	0.000146409	0.00197945	down	2361	SCPL42	Serine carboxypeptidase-like 42 [Source:UniProtKB/Swiss-Prot;Acc:Q9FH05]
AT4G12500	9.88784	0	19.7757	#NAME?	3.05e-08	8.12e-07	down	966		pEARLI1-like lipid transfer protein 3 [Source:UniProtKB/Swiss-Prot;Acc:Q9SU33]
AT4G13670	247.234	178.612	315.857	-0.822443	8.15e-05	0.00117796	down	1373	PTAC5	Protein disulfide isomerase pTAC5, chloroplastic [Source:UniProtKB/Swiss-Prot;Acc:A1A6M1]
AT1G50450	140.635	34.9461	246.324	-2.81735	3.94e-26	4.78e-24	down	1559		At1g50450/F11F12_20 [Source:UniProtKB/TrEMBL;Acc:Q94BZ0]
AT1G32470	179.042	15.598	342.487	-4.45661	4.9e-56	2.36e-53	down	829	GDH3	Glycine cleavage system H protein 3, mitochondrial [Source:UniProtKB/Swiss-Prot;Acc:Q9LQL0]
AT5G28750	322.969	252.859	393.079	-0.636487	0.00132046	0.0132321	down	663	TATA	Sec-independent protein translocase protein TATA, chloroplastic [Source:UniProtKB/Swiss-Prot;Acc:Q9LKU2]
AT3G26085	278.201	165.38	391.022	-1.24147	7.35e-09	2.12e-07	down	1210		CAAX amino terminal protease family protein [Source:UniProtKB/TrEMBL;Acc:A8MRZ2]
AT5G07190	110.875	0.377384	221.372	-9.19622	8.12e-29	1.13e-26	down	1038	ATS3	Embryo-specific protein ATS3 [Source:UniProtKB/Swiss-Prot;Acc:Q9LYP6]
AT2G24060	215.02	134.144	295.896	-1.14131	1.59e-07	3.73e-06	down	1508	IF3-2	Translation initiation factor IF3-2, chloroplastic [Source:UniProtKB/Swiss-Prot;Acc:O82234]
AT5G57630	1680.12	1134.67	2225.57	-0.971903	2.56e-09	7.89e-08	down	1740	CIPK21	CBL-interacting serine/threonine-protein kinase 21 [Source:UniProtKB/Swiss-Prot;Acc:Q94CG0]
AT1G19715	706.314	467.326	945.301	-1.01634	4.59e-09	1.37e-07	down	2061	JAL3	Jacalin-related lectin 3 [Source:UniProtKB/Swiss-Prot;Acc:F4HQX1]
AT1G05190	461.905	192.221	731.589	-1.92827	9.08e-24	9.23e-22	down	1051	RPL6	50S ribosomal protein L6, chloroplastic [Source:UniProtKB/Swiss-Prot;Acc:O23049]
AT5G67370	120.161	86.922	153.4	-0.819503	0.000791769	0.00860477	down	1553	CGLD27	Protein CONSERVED IN THE GREEN LINEAGE AND DIATOMS 27, chloroplastic [Source:UniProtKB/Swiss-Prot;Acc:Q9FN15]
AT2G33255	219.942	177.263	262.62	-0.567084	0.00583042	0.0464767	down	1020		Haloacid dehalogenase-like hydrolase domain-containing protein At2g33255 [Source:UniProtKB/Swiss-Prot;Acc:Q8RYE9]
AT2G33250	331.136	65.896	596.376	-3.17796	6.2e-35	1.19e-32	down	1058		At2g33250/F25I18.1 [Source:UniProtKB/TrEMBL;Acc:O22777]
AT5G24314	138.313	74.2103	202.416	-1.44763	6.51e-09	1.9e-07	down	726	PTAC7	plastid transcriptionally active7 [Source:TAIR;Acc:AT5G24314]
AT1G09850	676.003	413.62	938.386	-1.18188	1.52e-11	6e-10	down	1752	XBCP3	At1g09850 [Source:UniProtKB/TrEMBL;Acc:Q0WVJ5]
AT3G06778	234.426	176.345	292.507	-0.730074	0.00343885	0.0298862	down	1023		Chaperone DnaJ-domain superfamily protein [Source:UniProtKB/TrEMBL;Acc:F4JC50]
AT4G30650	1425.69	854.214	1997.17	-1.22528	4.35e-06	8.09e-05	down	837		UPF0057 membrane protein At4g30650 [Source:UniProtKB/Swiss-Prot;Acc:Q9M095]
AT2G05310	79.4987	2.25625	156.741	-6.11831	2.73e-42	7.19e-40	down	912		Expressed protein [Source:UniProtKB/TrEMBL;Acc:Q9SJ31]
AT4G33670	254.307	201.558	307.056	-0.607308	0.00344056	0.0298907	down	1292	LGALDH	L-galactose dehydrogenase [Source:UniProtKB/Swiss-Prot;Acc:O81884]
AT1G31335	239.666	181.801	297.531	-0.71068	0.00153219	0.0150523	down	737		At1g31335 [Source:UniProtKB/TrEMBL;Acc:Q8LG39]
AT5G16010	560.453	174.11	946.796	-2.44305	4.81e-09	1.43e-07	down	1147		3-oxo-5-alpha-steroid 4-dehydrogenase family protein [Source:UniProtKB/TrEMBL;Acc:Q9LFS3]
AT2G27680	326.097	219.401	432.793	-0.980111	6.82e-07	1.47e-05	down	1515		At2g27680/F15K20.22 [Source:UniProtKB/TrEMBL;Acc:Q9ZUX0]
AT1G19150	3.25891	0	6.51782	#NAME?	0.00392922	0.0333032	down	1162	LHCA6	Photosystem I chlorophyll a/b-binding protein 6, chloroplastic [Source:UniProtKB/Swiss-Prot;Acc:Q8LCQ4]
AT5G14320	462.857	237.397	688.317	-1.53577	2.92e-10	1.01e-08	down	1203	RPS13	30S ribosomal protein S13, chloroplastic [Source:UniProtKB/Swiss-Prot;Acc:P42732]
AT1G12900	208.135	4.37409	411.895	-6.55715	1.64e-50	6.14e-48	down	1461	GAPA-2	glyceraldehyde 3-phosphate dehydrogenase A subunit 2 [Source:TAIR;Acc:AT1G12900]
AT4G26150	8.17882	0	16.3576	#NAME?	4.97e-05	0.000752954	down	1632	GATA22	Putative GATA transcription factor 22 [Source:UniProtKB/Swiss-Prot;Acc:Q9SZI6]
AT3G50270	7.39298	0.663074	14.1229	-4.41272	0.000107549	0.00150197	down	1711		Anthranilate N-hydroxycinnamoyl/benzoyltransferase-like protein [Source:UniProtKB/TrEMBL;Acc:Q9SNE0]
AT4G24790	525.312	407.216	643.409	-0.659941	0.000304182	0.00377017	down	3398		Protein STICHEL-like 2 [Source:UniProtKB/Swiss-Prot;Acc:F4JRP8]
AT5G02120	32.4133	2.08092	62.7456	-4.91422	7.52e-18	5.08e-16	down	526	OHP1	Light-harvesting complex-like protein OHP1, chloroplastic [Source:UniProtKB/Swiss-Prot;Acc:O81208]
AT3G08740	291.667	177.28	406.054	-1.19564	6.84e-09	1.98e-07	down	1020		Elongation factor P (EF-P) family protein [Source:UniProtKB/TrEMBL;Acc:Q8VZW6]
AT3G61200	1082.8	860.462	1305.15	-0.601029	0.00115538	0.0118972	down	943		AT3g61200/T20K12_100 [Source:UniProtKB/TrEMBL;Acc:Q9M2E4]
AT3G57190	92.5884	8.47188	176.705	-4.38252	4.29e-26	5.18e-24	down	1760	PRFB3	PrfB3 [Source:UniProtKB/TrEMBL;Acc:A0A178VAE2]
AT5G09930	5.19043	0	10.3809	#NAME?	0.000269297	0.00340529	down	2175	ABCF2	ABC transporter F family member 2 [Source:UniProtKB/Swiss-Prot;Acc:Q9FIB4]
AT4G23260	21.6185	9.15274	34.0842	-1.89683	0.000537101	0.00612864	down	2032	CRK18	Cysteine-rich receptor-like protein kinase 18 [Source:UniProtKB/Swiss-Prot;Acc:Q8RX80]
AT1G03600	116.489	9.42064	223.558	-4.56868	1.1e-36	2.27e-34	down	1315	PSB27-1	Photosystem II repair protein PSB27-H1, chloroplastic [Source:UniProtKB/Swiss-Prot;Acc:Q9LR64]
AT5G51020	306.052	211.357	400.747	-0.923009	3.9e-06	7.31e-05	down	1161	CRL	Chromophore lyase CRL, chloroplastic [Source:UniProtKB/Swiss-Prot;Acc:Q9FI46]
AT4G04330	11.9311	0.377384	23.4849	-5.95955	1.05e-07	2.56e-06	down	726	RBCX1	Chaperonin-like RBCX protein 1, chloroplastic [Source:UniProtKB/Swiss-Prot;Acc:Q94AU9]
AT5G57850	459.126	376.243	542.01	-0.526655	0.00438583	0.036422	down	1352	DAAT	Branched-chain amino acid aminotransferase like protein [Source:UniProtKB/TrEMBL;Acc:Q0WW83]
AT1G12250	157.445	25.8872	289.002	-3.48077	3.14e-07	7.18e-06	down	1124	TL20.3	Thylakoid lumenal protein TL20.3, chloroplastic [Source:UniProtKB/Swiss-Prot;Acc:Q8H1Q1]
AT4G38160	211.234	123.944	298.524	-1.26816	1.01e-08	2.87e-07	down	1742	pde191	Mitochondrial transcription termination factor family protein [Source:UniProtKB/TrEMBL;Acc:F4JSY9]
AT3G52740	477.058	45.203	908.913	-4.32965	2.82e-85	3.2e-82	down	945	BIC1	Protein BIC1 [Source:UniProtKB/Swiss-Prot;Acc:Q9LXJ1]
AT4G37800	1098.38	460.122	1736.64	-1.91621	0.000372536	0.00450357	down	1288	XTH7	Probable xyloglucan endotransglucosylase/hydrolase protein 7 [Source:UniProtKB/Swiss-Prot;Acc:Q8LER3]
AT4G01080	25.5391	15.2839	35.7944	-1.22773	0.0060058	0.0476728	down	1676	TBL26	Mannan O-acetyltransferase 4 [Source:UniProtKB/TrEMBL;Acc:A0A346P851]
AT4G10470	190.424	151.058	229.79	-0.605207	0.00517881	0.0419606	down	1427		AT4g10470/F7L13_50 [Source:UniProtKB/TrEMBL;Acc:Q944H1]
AT5G19850	203.036	95.59	310.481	-1.69957	7.2e-09	2.08e-07	down	1383		Alpha/beta-Hydrolases superfamily protein [Source:UniProtKB/TrEMBL;Acc:F4K2M9]
AT5G40950	754.592	454.52	1054.66	-1.21437	1.82e-12	7.96e-11	down	950	RPL27	50S ribosomal protein L27, chloroplastic [Source:UniProtKB/Swiss-Prot;Acc:Q9FLN4]
AT3G25660	755.899	599.814	911.983	-0.604492	0.000505816	0.00581143	down	2091	GATA	Glutamyl-tRNA(Gln) amidotransferase subunit A, chloroplastic/mitochondrial [Source:UniProtKB/Swiss-Prot;Acc:Q9LI77]
AT4G21870	29.5459	9.02413	50.0676	-2.47202	1.64e-07	3.85e-06	down	1032	HSP15.4	15.4 kDa class V heat shock protein [Source:UniProtKB/Swiss-Prot;Acc:O49710]
AT3G26310	9.36659	0	18.7332	#NAME?	8.48e-08	2.1e-06	down	1660	CYP71B35	Putative cytochrome P450 [Source:UniProtKB/TrEMBL;Acc:Q0WVN2]
AT4G14690	291.784	13.4539	570.115	-5.40516	1.85e-06	3.66e-05	down	909	ELIP2	Early light-induced protein 2, chloroplastic [Source:UniProtKB/Swiss-Prot;Acc:Q94K66]
AT1G16320	286.936	186.193	387.679	-1.05806	2.15e-07	5.01e-06	down	1174		At1g16320/F3O9_12 [Source:UniProtKB/TrEMBL;Acc:Q9SA31]
AT3G52880	7068.15	5858.6	8277.7	-0.498674	0.00141879	0.0140486	down	1799	ATMDAR1	Monodehydroascorbate reductase 1 [Source:UniProtKB/TrEMBL;Acc:F4J849]
AT5G58070	2891.49	1096.43	4686.54	-2.09571	1.32e-07	3.18e-06	down	1272	TIL	TIL [Source:UniProtKB/TrEMBL;Acc:A0A178US04]
AT4G03020	2759.98	2184.66	3335.3	-0.610409	8.81e-05	0.00126473	down	2051		Putative WD-repeat protein [Source:UniProtKB/TrEMBL;Acc:Q8LPI5]
AT5G52250	214.648	50.4058	378.89	-2.91012	5.73e-09	1.68e-07	down	1580	RUP1	WD repeat-containing protein RUP1 [Source:UniProtKB/Swiss-Prot;Acc:Q9LTJ6]
AT5G54090	175.612	127.675	223.55	-0.808126	0.000489708	0.00566277	down	2594		DNA mismatch repair protein MutS, type 2 [Source:UniProtKB/TrEMBL;Acc:F4JYU0]
AT5G58330	487.528	82.7959	892.26	-3.42983	1.87e-48	6.22e-46	down	1694		Malate dehydrogenase [NADP], chloroplastic [Source:UniProtKB/Swiss-Prot;Acc:Q8H1E2]
AT2G38230	133.405	39.7546	227.056	-2.51385	1.38e-08	3.86e-07	down	1283	PDX11	Pyridoxal 5'-phosphate synthase subunit PDX1.1 [Source:UniProtKB/Swiss-Prot;Acc:O80448]
AT1G24340	611.761	360.465	863.057	-1.2596	6.41e-12	2.63e-10	down	2479	EMB260	FAD/NAD(P)-binding oxidoreductase family protein [Source:UniProtKB/TrEMBL;Acc:Q8GYJ7]
AT1G33290	377.107	304.339	449.876	-0.563851	0.00457255	0.0377205	down	1240		At1g33290 [Source:UniProtKB/TrEMBL;Acc:Q9C877]
AT3G62410	39.9764	13.8304	66.1224	-2.2573	0.000429055	0.00507764	down	637	CP12-2	Calvin cycle protein CP12-2, chloroplastic [Source:UniProtKB/Swiss-Prot;Acc:Q9LZP9]
AT4G37300	1642.2	1209.08	2075.32	-0.779427	0.000501515	0.00577527	down	1384	MEE59	AT4g37300/C7A10_60 [Source:UniProtKB/TrEMBL;Acc:O23157]
AT4G25910	163.386	105.689	221.083	-1.06477	3.41e-06	6.47e-05	down	1148	NIFU3	NifU-like protein 3, chloroplastic [Source:UniProtKB/Swiss-Prot;Acc:Q84RQ7]
AT1G80630	193.731	136.652	250.81	-0.876088	0.000107207	0.00149886	down	1972		At1g80630 [Source:UniProtKB/TrEMBL;Acc:Q9M8N0]
AT2G22650	282.778	169.227	396.329	-1.22774	1.65e-09	5.24e-08	down	1532		FAD-dependent oxidoreductase family protein [Source:UniProtKB/TrEMBL;Acc:Q5S4X7]
AT4G25130	1773.47	1408.77	2138.17	-0.601938	0.000177396	0.00234404	down	1157	MSR4	Peptide methionine sulfoxide reductase A4, chloroplastic [Source:UniProtKB/Swiss-Prot;Acc:P54150]
AT4G28750	10.2419	0	20.4838	#NAME?	1.97e-08	5.39e-07	down	798	PSAE1	Photosystem I reaction center subunit IV A, chloroplastic [Source:UniProtKB/Swiss-Prot;Acc:Q9S831]
AT2G38780	279.639	192.385	366.892	-0.931357	7.04e-06	0.000126382	down	2890		unknown protein; FUNCTIONS IN: molecular_function unknown; INVOLVED IN: biological_process unknown; LOCATED IN: chloroplast; EXPRESSED IN: 21 plant structures; EXPRESSED DURING: 13 growth stages; Ha. [Source:TAIR;Acc:AT2G38780]
AT4G24660	5.09855	0.663074	9.53403	-3.84585	0.00334859	0.0292542	down	1052	ATHB22	homeobox protein 22 [Source:TAIR;Acc:AT4G24660]
AT1G01800	1640.56	1339.01	1942.11	-0.536456	0.00108859	0.0113166	down	1167		AT1G01800 protein [Source:UniProtKB/TrEMBL;Acc:Q94K30]
AT5G11450	279.173	210.59	347.757	-0.723643	0.000331822	0.00408241	down	1242		PPD5 [Source:UniProtKB/TrEMBL;Acc:A0A384KVS7]
AT2G44210	303.26	231.674	374.846	-0.694202	0.000651541	0.00722997	down	1854		AT2G44210 protein [Source:UniProtKB/TrEMBL;Acc:B9DGK6]
AT2G35660	47.8382	13.3894	82.2871	-2.61958	2.54e-11	9.71e-10	down	1469	CTF2A	FAD/NAD(P)-binding oxidoreductase family protein [Source:UniProtKB/TrEMBL;Acc:Q9ZQN9]
AT2G43530	26.3457	10.5625	42.1288	-1.99585	4.57e-05	0.000698443	down	252	ATTI3	Defensin-like protein 194 [Source:UniProtKB/Swiss-Prot;Acc:O22867]
AT5G52420	247.091	155.715	338.466	-1.1201	1.17e-07	2.82e-06	down	1238		Transmembrane protein [Source:UniProtKB/TrEMBL;Acc:Q9FHB8]
AT5G44520	168.342	132.318	204.367	-0.627155	0.00512903	0.0416517	down	1313		NagB/RpiA/CoA transferase-like superfamily protein [Source:TAIR;Acc:AT5G44520]
AT2G18940	357.901	280.805	434.997	-0.631438	0.00107599	0.0112043	down	2774		Pentatricopeptide repeat-containing protein At2g18940, chloroplastic [Source:UniProtKB/Swiss-Prot;Acc:O64624]
AT2G33530	478.311	394.864	561.759	-0.508595	0.00484342	0.0396283	down	1756	SCPL46	Serine carboxypeptidase-like 46 [Source:UniProtKB/Swiss-Prot;Acc:Q8VY01]
AT3G63140	72.8321	6.53824	139.126	-4.41135	4.22e-30	6.35e-28	down	1529	CSP41A	Chloroplast stem-loop binding protein of 41 kDa a, chloroplastic [Source:UniProtKB/Swiss-Prot;Acc:Q9LYA9]
AT3G11560	1195.62	946.64	1444.61	-0.609789	0.000207108	0.00268125	down	2747		AT3G11560 protein [Source:UniProtKB/TrEMBL;Acc:Q8H0W4]
AT5G46580	238.657	163.457	313.856	-0.941188	7.84e-06	0.000139021	down	2202		Pentatricopeptide repeat-containing protein At5g46580, chloroplastic [Source:UniProtKB/Swiss-Prot;Acc:Q9LS25]
AT1G35830	182.269	139.236	225.301	-0.694317	0.0019882	0.0188082	down	1837		VQ motif-containing protein [Source:UniProtKB/TrEMBL;Acc:Q9C8B9]
AT1G67105	64.3616	43.8684	84.8548	-0.951815	0.00256498	0.0233717	down	786		other RNA [Source:TAIR;Acc:AT1G67105]
AT1G53090	403.827	67.6589	739.995	-3.45116	4.34e-41	1.07e-38	down	2807	SPA4	SPA4 [Source:UniProtKB/TrEMBL;Acc:A0A178WBA0]
AT5G38000	518.594	396.329	640.859	-0.693308	0.000292856	0.00365151	down	1313		At5g38000 [Source:UniProtKB/TrEMBL;Acc:Q9LTB4]
AT5G36120	6.04121	0	12.0824	#NAME?	2.73e-05	0.000436497	down	846	CCB3	Protein COFACTOR ASSEMBLY OF COMPLEX C SUBUNIT B CCB3, chloroplastic [Source:UniProtKB/Swiss-Prot;Acc:Q8RWM7]
AT5G27290	13.2358	2.3021	24.1695	-3.39217	6.27e-06	0.000113601	down	1291		At5g27290 [Source:UniProtKB/TrEMBL;Acc:Q08AA8]
AT1G03680	283.733	166.391	401.076	-1.2693	5.54e-10	1.88e-08	down	957	ATHM1	Thioredoxin M1, chloroplastic [Source:UniProtKB/Swiss-Prot;Acc:O48737]
AT1G09480	148.34	115.506	181.173	-0.649405	0.0057957	0.0462399	down	1206		NAD(P)-binding Rossmann-fold superfamily protein [Source:UniProtKB/TrEMBL;Acc:F4I0Z5]
AT2G32500	101.756	74.0134	129.498	-0.807073	0.00220412	0.0205554	down	1114		At2g32500 [Source:UniProtKB/TrEMBL;Acc:Q67XD6]
AT5G13930	37641.6	38.7043	75244.5	-10.9249	2.64e-71	2e-68	down	1703	CHS	Chalcone synthase family protein [Source:UniProtKB/TrEMBL;Acc:Q460R0]
AT3G06630	119.963	84.7788	155.147	-0.871864	0.000501033	0.00577238	down	3345		Protein kinase family protein [Source:UniProtKB/TrEMBL;Acc:A0A1I9LPU6]
AT3G03710	656.548	514.183	798.914	-0.63576	0.000342253	0.00419218	down	3317	PNP1	Polyribonucleotide nucleotidyltransferase 1, chloroplastic [Source:UniProtKB/Swiss-Prot;Acc:Q8GZQ3]
AT2G46820	263.787	102.651	424.924	-2.04945	9.72e-22	8.65e-20	down	1082	CURT1B	Protein CURVATURE THYLAKOID 1B, chloroplastic [Source:UniProtKB/Swiss-Prot;Acc:Q8LCA1]
AT2G36290	5623.84	4246.72	7000.96	-0.721203	4.7e-06	8.68e-05	down	1877		Alpha/beta-Hydrolases superfamily protein [Source:UniProtKB/TrEMBL;Acc:Q9SJM9]
AT1G34000	323.347	101.481	545.214	-2.42561	7.03e-15	3.79e-13	down	824	OHP2	OHP2 [Source:UniProtKB/TrEMBL;Acc:A0A178WAB5]
AT4G15530	310.66	164.818	456.502	-1.46975	3.2e-10	1.11e-08	down	3003	PPDK	Pyruvate, phosphate dikinase 1, chloroplastic [Source:UniProtKB/Swiss-Prot;Acc:O23404]
AT1G25275	1160.82	867.487	1454.15	-0.745263	0.0030646	0.0271046	down	583		AT1G25275 protein [Source:UniProtKB/TrEMBL;Acc:B9DG55]
AT1G64860	508.695	388.307	629.082	-0.69605	0.000119371	0.00164398	down	2178	SIGA	RNA polymerase sigma factor sigA [Source:UniProtKB/Swiss-Prot;Acc:O24629]
AT3G15520	92.1827	32.7272	151.638	-2.21207	5.78e-14	2.85e-12	down	1549	CYP37	Peptidyl-prolyl cis-trans isomerase CYP37, chloroplastic [Source:UniProtKB/Swiss-Prot;Acc:P82869]
AT3G27650	285.025	121.629	448.422	-1.88237	1.36e-16	8.28e-15	down	999	LBD25	LOB domain-containing protein 25 [Source:UniProtKB/Swiss-Prot;Acc:Q8L8Q3]
AT4G21210	81.6232	41.4079	121.838	-1.55699	2.39e-05	0.000388516	down	1475	RP1	Pyruvate, phosphate dikinase regulatory protein 1, chloroplastic [Source:UniProtKB/Swiss-Prot;Acc:O49562]
AT3G06430	348.918	280.176	417.66	-0.575993	0.0028401	0.0255004	down	1774	EMB2750	Pentatricopeptide repeat-containing protein At3g06430, chloroplastic [Source:UniProtKB/Swiss-Prot;Acc:Q9SQU6]
AT1G79040	1632.25	204.799	3059.7	-3.90111	2.09e-97	3.74e-94	down	784	PSBR	Photosystem II 10 kDa polypeptide, chloroplastic [Source:UniProtKB/Swiss-Prot;Acc:P27202]
AT3G48500	364.322	251.177	477.467	-0.926698	2.2e-06	4.32e-05	down	2398	PDE312	Nucleic acid-binding, OB-fold-like protein [Source:TAIR;Acc:AT3G48500]
AT3G44990	4751.49	3033.34	6469.65	-1.09278	0.00131602	0.0132025	down	1393	XTH31	Xyloglucan endotransglucosylase/hydrolase protein 31 [Source:UniProtKB/Swiss-Prot;Acc:P93046]
AT1G06640	8671.2	6447.36	10895	-0.756891	1.27e-06	2.6e-05	down	1655		1-aminocyclopropane-1-carboxylate oxidase homolog 2 [Source:UniProtKB/Swiss-Prot;Acc:Q9C5K7]
AT5G63450	393.135	137.547	648.723	-2.23768	1.14e-19	8.77e-18	down	1870	CYP94B1	cytochrome P450, family 94, subfamily B, polypeptide 1 [Source:TAIR;Acc:AT5G63450]
AT1G49660	1775.76	1362.95	2188.58	-0.683264	1.8e-05	0.000299106	down	1268	CXE5	Probable carboxylesterase 5 [Source:UniProtKB/Swiss-Prot;Acc:Q9FX94]
AT1G69230	429.336	220.597	638.074	-1.53231	3.7e-05	0.000576459	down	716	SP1L2	Protein SPIRAL1-like 2 [Source:UniProtKB/Swiss-Prot;Acc:Q9LE54]
AT4G30720	393.564	294.601	492.527	-0.74144	0.000147727	0.00199296	down	2570		FAD/NAD(P)-binding oxidoreductase family protein [Source:UniProtKB/TrEMBL;Acc:F4JQE2]
AT1G17650	156.39	115.978	196.803	-0.762902	0.00120497	0.0123065	down	1443	GLYR2	Glyoxylate/succinic semialdehyde reductase 2, chloroplastic [Source:UniProtKB/Swiss-Prot;Acc:F4I907]
AT5G51010	121.596	58.2404	184.952	-1.66706	4.79e-09	1.42e-07	down	886		Rubredoxin-like superfamily protein [Source:UniProtKB/TrEMBL;Acc:Q9FI47]
AT5G02280	325.926	256.003	395.848	-0.628785	0.001427	0.0141177	down	661		SNARE-like superfamily protein [Source:UniProtKB/TrEMBL;Acc:Q9LZ97]
AT1G76020	412.517	300.612	524.422	-0.802828	2.49e-05	0.000403109	down	1025		At1g76020 [Source:UniProtKB/TrEMBL;Acc:A0JQ12]
AT2G02130	7736.02	6044.4	9427.64	-0.641296	4.14e-05	0.000639549	down	707	PDF2.3	Defensin-like protein 1 [Source:UniProtKB/Swiss-Prot;Acc:Q9ZUL7]
AT2G43910	9164.42	3912.65	14416.2	-1.88147	4.67e-32	7.58e-30	down	1068	ATHOL1	HOL1 [Source:UniProtKB/TrEMBL;Acc:A0A178VXT1]
AT5G38980	56.9914	9.57725	104.406	-3.44644	2.65e-05	0.000425583	down	727		At5g38980 [Source:UniProtKB/TrEMBL;Acc:Q8GXY9]
AT1G18730	10.3675	0.607896	20.127	-5.04917	1.08e-06	2.24e-05	down	849	PNSB4	Photosynthetic NDH subunit of subcomplex B 4, chloroplastic [Source:UniProtKB/Swiss-Prot;Acc:Q8RXS1]
AT5G24060	549.457	406.378	692.535	-0.769066	2.74e-05	0.000436955	down	1561		Pentatricopeptide repeat (PPR) superfamily protein [Source:UniProtKB/TrEMBL;Acc:F4KFP8]
ATCG01020	18.8039	8.24177	29.3661	-1.83313	0.0013252	0.0132583	down	159	RPL32	50S ribosomal protein L32, chloroplastic [Source:UniProtKB/Swiss-Prot;Acc:P61847]
AT3G16450	24157.3	15898.7	32416	-1.0278	0.00558227	0.0448662	down	1293	JAL33	Jacalin-related lectin 33 [Source:UniProtKB/Swiss-Prot;Acc:O04311]
AT3G49160	129.843	65.3624	194.324	-1.57193	0.000564437	0.00637656	down	2450	PKP4	Plastidial pyruvate kinase 4, chloroplastic [Source:UniProtKB/Swiss-Prot;Acc:Q9M3B6]
AT5G01410	1919.2	1461.51	2376.89	-0.701611	1.54e-05	0.000259429	down	1538	PDX13	Pyridoxal 5'-phosphate synthase subunit PDX1.3 [Source:UniProtKB/Swiss-Prot;Acc:Q8L940]
AT4G15765	646.652	376.186	917.118	-1.28566	0.000595588	0.00667421	down	1646		FAD/NAD(P)-binding oxidoreductase family protein [Source:UniProtKB/TrEMBL;Acc:F4JK86]
AT3G47470	397.705	109.003	686.407	-2.65469	3.17e-38	7.02e-36	down	1295	LHCA4	Chlorophyll a-b binding protein, chloroplastic [Source:UniProtKB/TrEMBL;Acc:A0A178VEE6]
AT3G53030	654.315	520.112	788.517	-0.600321	0.00180404	0.0173149	down	1998	SRPK4	Ser/arg-rich protein kinase 4 [Source:UniProtKB/TrEMBL;Acc:F4J982]
AT3G56040	344.18	273.089	415.271	-0.604684	0.00235472	0.0217731	down	3052	UGP3	UTP--glucose-1-phosphate uridylyltransferase 3, chloroplastic [Source:UniProtKB/Swiss-Prot;Acc:F4IY62]
AT4G12800	262.963	11.8314	514.094	-5.44135	4.15e-24	4.34e-22	down	1062	PSAL	photosystem I subunit l [Source:TAIR;Acc:AT4G12800]
AT1G63240	201.053	75.8048	326.3	-2.10584	6.8e-20	5.35e-18	down	2502		Uncharacterized protein At1g63240 [Source:UniProtKB/TrEMBL;Acc:Q949Y1]
AT2G34080	85.9068	30.7715	141.042	-2.19646	6.75e-09	1.96e-07	down	1369		Cysteine proteinases superfamily protein [Source:UniProtKB/TrEMBL;Acc:O22961]
AT3G52340	541.875	434.424	649.326	-0.57984	0.00101348	0.0106376	down	1710	SPP2	Sucrose-6F-phosphate phosphohydrolase 2 [Source:UniProtKB/TrEMBL;Acc:A0A1I9LQG1]
AT2G28550	1624.14	991.827	2256.46	-1.1859	3.03e-13	1.41e-11	down	2251	RAP2.7	Related to AP2.7 [Source:UniProtKB/TrEMBL;Acc:F4IIR3]
AT2G41660	4602.85	3479.01	5726.69	-0.719024	2.74e-06	5.29e-05	down	1715	MIZ1	MIZ1 [Source:UniProtKB/TrEMBL;Acc:A0A178VY97]
AT5G17230	896.246	457.39	1335.1	-1.54545	7.18e-18	4.87e-16	down	1956	PSY	PHYTOENE SYNTHASE [Source:UniProtKB/TrEMBL;Acc:F4KGX7]
AT1G59840	49.6607	25.8028	73.5186	-1.51058	3.09e-05	0.000487571	down	1376	CCB4	Protein COFACTOR ASSEMBLY OF COMPLEX C SUBUNIT B CCB4, chloroplastic [Source:UniProtKB/Swiss-Prot;Acc:Q6NQK9]
AT2G37040	25196.6	17785.7	32607.6	-0.874492	4.6e-05	0.000701587	down	2931	PAL1	Phenylalanine ammonia-lyase 1 [Source:UniProtKB/Swiss-Prot;Acc:P35510]
AT1G54340	1717.48	1371.96	2062.99	-0.588506	0.000256112	0.00325999	down	1744	ICDH	Peroxisomal isocitrate dehydrogenase [NADP] [Source:UniProtKB/Swiss-Prot;Acc:Q9SLK0]
AT5G51110	122.864	18.4919	227.237	-3.61923	6.82e-34	1.23e-31	down	1218	ATP1	Probable pterin-4-alpha-carbinolamine dehydratase, chloroplastic [Source:UniProtKB/Swiss-Prot;Acc:Q9LU63]
AT1G24265	159.138	121.412	196.863	-0.697276	0.00303379	0.0268606	down	1468		Protein of unknown function (DUF1664) [Source:TAIR;Acc:AT1G24265]
AT2G29320	112.884	45.7726	179.995	-1.9754	4.81e-07	1.07e-05	down	1311		Tropinone reductase homolog At2g29320 [Source:UniProtKB/Swiss-Prot;Acc:Q9ZW15]
AT5G50240	53.3527	34.1905	72.5149	-1.08468	0.00131645	0.0132025	down	872	PIMT2	Protein-L-isoaspartate O-methyltransferase 2 [Source:UniProtKB/Swiss-Prot;Acc:Q64J17]
AT2G47460	847.496	142.572	1552.42	-3.44475	6.43e-31	9.93e-29	down	1583	MYB12	Transcription factor MYB12 [Source:UniProtKB/Swiss-Prot;Acc:O22264]
AT1G29240	115.578	71.8318	159.324	-1.14927	2.53e-05	0.000408205	down	2390		F28N24.8 protein [Source:UniProtKB/TrEMBL;Acc:Q9LP52]
AT5G22020	3362.41	632.813	6092.01	-3.26707	1.9e-13	9.04e-12	down	1574		At5g22020 [Source:UniProtKB/TrEMBL;Acc:Q9C586]
AT5G16530	166.258	24.6697	307.846	-3.64139	5.25e-08	1.34e-06	down	1406	PIN5	Auxin efflux carrier component [Source:UniProtKB/TrEMBL;Acc:A0A178UIR3]
AT3G17609	587.532	196.855	978.209	-2.31301	2e-11	7.75e-10	down	673	HYH	HYH [Source:UniProtKB/TrEMBL;Acc:A0A178VIU6]
AT4G03420	1042.97	569.071	1516.87	-1.41442	0.00121057	0.0123391	down	2040		AT4g03420/F9H3_4 [Source:UniProtKB/TrEMBL;Acc:Q8S9K9]
AT2G21530	25.763	1.34441	50.1816	-5.22212	1.58e-07	3.73e-06	down	894		At2g21530 [Source:UniProtKB/TrEMBL;Acc:Q8GWP4]
AT2G23000	91.5356	13.9233	169.148	-3.60271	1.2e-10	4.32e-09	down	1838	SCPL10	Scpl10 [Source:UniProtKB/TrEMBL;Acc:A0A178VYK6]
AT1G52220	53.7641	5.95793	101.57	-4.09152	3.98e-22	3.66e-20	down	840	CURT1C	CURT1C [Source:UniProtKB/TrEMBL;Acc:A0A178WBD4]
AT1G05385	79.4516	55.6476	103.256	-0.891829	0.00275796	0.0248763	down	742	PSB27-2	Psb27-H1 [Source:UniProtKB/TrEMBL;Acc:A0A178WJM6]
AT3G51510	50.8617	5.28593	96.4374	-4.18936	8.22e-22	7.35e-20	down	1204		AT3g51510/F26O13_150 [Source:UniProtKB/TrEMBL;Acc:Q9SCZ8]
AT1G17830	142.184	101.42	182.947	-0.851077	0.000482283	0.00560022	down	1709		At1g17830 [Source:UniProtKB/TrEMBL;Acc:Q9LMU5]
AT5G64380	67.0653	39.4485	94.682	-1.26312	7.85e-05	0.00113981	down	1493		AT5g64380/MSJ1_22 [Source:UniProtKB/TrEMBL;Acc:Q9FMF1]
AT5G65380	7700.44	4492.1	10908.8	-1.28002	0.000321458	0.00396465	down	1973	DTX27	Protein DETOXIFICATION 27 [Source:UniProtKB/Swiss-Prot;Acc:Q9FKQ1]
AT1G74850	337.271	200.776	473.767	-1.23859	3.68e-10	1.27e-08	down	3425	PTAC2	PTAC2 [Source:UniProtKB/TrEMBL;Acc:A0A178WNJ2]
AT2G33180	52.6677	27.6421	77.6934	-1.49093	1.34e-05	0.000226386	down	1117		Uncharacterized protein At2g33180 [Source:UniProtKB/TrEMBL;Acc:O49317]
AT5G48620	797.749	423.108	1172.39	-1.47035	1.22e-05	0.000209292	down	3781	RPP8L4	Probable disease resistance RPP8-like protein 4 [Source:UniProtKB/Swiss-Prot;Acc:Q9FJK8]
AT1G73110	58.616	31.438	85.7941	-1.44837	2.4e-05	0.000388516	down	1346		At1g73110/F3N23_39 [Source:UniProtKB/TrEMBL;Acc:Q9AST9]
AT2G28690	359.303	259.825	458.78	-0.820258	1.17e-05	0.000201561	down	1117		TOX high mobility group box protein, putative (DUF1635) [Source:UniProtKB/TrEMBL;Acc:Q8L8B6]
AT2G37660	441.384	125.055	757.712	-2.59908	7.69e-39	1.73e-36	down	1328		Uncharacterized protein At2g37660, chloroplastic [Source:UniProtKB/Swiss-Prot;Acc:O80934]
AT1G65560	339.393	196.397	482.39	-1.29643	3.81e-07	8.58e-06	down	1664		Zinc-binding dehydrogenase family protein [Source:UniProtKB/TrEMBL;Acc:F4IBH8]
AT3G54260	2993.88	2352.48	3635.28	-0.627881	9.45e-05	0.00134392	down	1488	TBL36	Protein trichome birefringence-like 36 [Source:UniProtKB/Swiss-Prot;Acc:Q940H3]
AT5G19500	53.8993	6.08527	101.713	-4.06304	1.45e-22	1.38e-20	down	1893		At5g19500 [Source:UniProtKB/TrEMBL;Acc:Q5PP33]
AT3G56630	190.841	141.502	240.18	-0.76329	0.000541782	0.00616857	down	1812	CYP94D2	Cytochrome P450, family 94, subfamily D, polypeptide 2 [Source:UniProtKB/TrEMBL;Acc:Q9LXX7]
AT3G26060	194.477	18.896	370.058	-4.2916	9.29e-56	4.39e-53	down	997	ATPRX Q	Thioredoxin superfamily protein [Source:UniProtKB/TrEMBL;Acc:F4JBC9]
AT1G66130	16.1351	4.15337	28.1169	-2.75908	2.3e-05	0.000374954	down	1536		NAD(P)-binding Rossmann-fold superfamily protein [Source:UniProtKB/TrEMBL;Acc:Q9C8D3]
AT4G01995	115.075	72.7169	157.433	-1.11437	1.67e-05	0.000279511	down	1112		Beta-carotene isomerase D27 [Source:UniProtKB/TrEMBL;Acc:Q8W4C4]
AT3G20810	2025.96	1666.2	2385.72	-0.517864	0.00149716	0.0147371	down	1713	JMJ30	Lysine-specific demethylase JMJ30 [Source:UniProtKB/Swiss-Prot;Acc:Q8RWR1]
AT5G06270	778.687	587.07	970.304	-0.724903	1.55e-05	0.000259779	down	1560		Gb [Source:UniProtKB/TrEMBL;Acc:Q9FNI1]
AT5G38290	145.848	110.276	181.419	-0.718211	0.00282011	0.0253911	down	1184		Peptidyl-tRNA hydrolase family protein [Source:UniProtKB/TrEMBL;Acc:A8MQQ3]
AT5G57030	188.881	51.6597	326.103	-2.65822	4.09e-28	5.5e-26	down	2131	LUT2	Lycopene epsilon cyclase, chloroplastic [Source:UniProtKB/Swiss-Prot;Acc:Q38932]
AT1G10770	4.31237	0	8.62474	#NAME?	0.000634987	0.00706632	down	948		At1g10770 [Source:UniProtKB/TrEMBL;Acc:Q9SAC5]
AT4G15920	1345.35	1081.41	1609.29	-0.573515	0.000388771	0.00466824	down	1287	SWEET17	Nodulin MtN3 family protein [Source:TAIR;Acc:AT4G15920]
AT5G57780	52.823	29.1712	76.4749	-1.39044	0.00349132	0.0302267	down	1064		At5g57780 [Source:UniProtKB/TrEMBL;Acc:Q9FJN6]
AT5G27390	105.572	55.4625	155.682	-1.48902	4.4e-08	1.13e-06	down	1132		Mog1/PsbP/DUF1795-like photosystem II reaction center PsbP family protein [Source:TAIR;Acc:AT5G27390]
AT2G28900	616.565	401.906	831.225	-1.04838	5.48e-09	1.62e-07	down	964	OEP161	Outer envelope pore protein 16-1, chloroplastic [Source:UniProtKB/Swiss-Prot;Acc:Q9ZV24]
AT2G34060	264.554	146.937	382.171	-1.37902	4.67e-06	8.63e-05	down	1353	PER19	Peroxidase 19 [Source:UniProtKB/Swiss-Prot;Acc:O22959]
AT3G63540	184.305	38.5069	330.103	-3.09973	2.34e-35	4.67e-33	down	1163		Mog1/PsbP/DUF1795-like photosystem II reaction center PsbP family protein [Source:TAIR;Acc:AT3G63540]
AT5G05200	845.82	601.891	1089.75	-0.856421	7.09e-07	1.52e-05	down	1947		Uncharacterized aarF domain-containing protein kinase At5g05200, chloroplastic [Source:UniProtKB/Swiss-Prot;Acc:Q9ASX5]
AT4G12310	57.8795	6.37224	109.387	-4.10149	1.67e-23	1.67e-21	down	2425	CYP706A5	CYP706A5 [Source:UniProtKB/TrEMBL;Acc:A0A178UVW4]
AT5G46110	679.765	113.488	1246.04	-3.45674	3.3e-65	2.11e-62	down	2096	APE2	Glucose-6-phosphate/phosphate translocator-like protein [Source:UniProtKB/TrEMBL;Acc:A0A219I0W9]
AT3G14110	623.689	496.213	751.165	-0.598172	0.000902513	0.00965924	down	1149	FLU	Tetratricopeptide repeat (TPR)-like superfamily protein [Source:UniProtKB/TrEMBL;Acc:F4JFR1]
AT5G63310	575.371	474.271	676.472	-0.512319	0.00371416	0.0317928	down	980	NDPK2	NDPK2 [Source:UniProtKB/TrEMBL;Acc:A0A384KNJ7]
AT5G48880	2535.9	72.9971	4998.8	-6.0976	9.44e-23	9.08e-21	down	1839	KAT5	PKT2 [Source:UniProtKB/TrEMBL;Acc:A0A178UEC0]
AT2G04270	158.601	104.18	213.021	-1.03191	9.9e-06	0.000172396	down	3163	RNE	Ribonuclease E/G-like protein, chloroplastic [Source:UniProtKB/Swiss-Prot;Acc:F4IV66]
AT5G53860	772.027	591.871	952.182	-0.685955	9.04e-05	0.00129286	down	1661	emb2737	Embryo defective 2737 [Source:UniProtKB/TrEMBL;Acc:F4JYQ8]
AT1G74470	1076.68	144.031	2009.33	-3.80226	2.37e-87	3.29e-84	down	2087	CHLP	Geranylgeranyl diphosphate reductase, chloroplastic [Source:UniProtKB/Swiss-Prot;Acc:Q9CA67]
AT4G37470	1359.56	759.605	1959.51	-1.36717	3.79e-13	1.75e-11	down	1492	KAI2	KAI2 [Source:UniProtKB/TrEMBL;Acc:A0A178V1E5]
AT1G65060	1025.12	61.0315	1989.21	-5.0265	5.93e-08	1.51e-06	down	2064	4CL3	4-coumarate--CoA ligase 3 [Source:UniProtKB/Swiss-Prot;Acc:Q9S777]
AT5G16960	15.4466	6.5565	24.3366	-1.89213	0.00242208	0.0222724	down	1296		Quinone oxidoreductase-like protein [Source:UniProtKB/TrEMBL;Acc:Q9LFK5]
AT1G61520	349.534	44.613	654.456	-3.87476	3.4e-57	1.74e-54	down	1209	LHCA3	Chlorophyll a-b binding protein, chloroplastic [Source:UniProtKB/TrEMBL;Acc:A0A178W5Y6]
AT5G02940	83.3319	42.6768	123.987	-1.53867	8.21e-08	2.04e-06	down	2856		Protein of unknown function (DUF1012) [Source:TAIR;Acc:AT5G02940]
AT5G42270	2131.17	828.925	3433.41	-2.05033	3.29e-21	2.83e-19	down	2491	FTSH5	VAR1 [Source:UniProtKB/TrEMBL;Acc:A0A178U8J6]
AT1G67030	2241.13	1693.01	2789.25	-0.720282	0.00194686	0.0184871	down	1111	ZFP6	Zinc finger protein 6 [Source:UniProtKB/Swiss-Prot;Acc:Q39265]
AT3G27160	423.64	291.525	555.755	-0.930828	9.63e-07	2.02e-05	down	1050	GHS1	Ribosomal protein S21 family protein [Source:UniProtKB/TrEMBL;Acc:A0A1I9LRJ3]
AT5G62200	759.911	512.438	1007.38	-0.975163	1.42e-06	2.87e-05	down	1209	ATS3B	Embryo-specific protein ATS3B [Source:UniProtKB/Swiss-Prot;Acc:Q6NPM5]
AT4G25700	331.965	188.098	475.831	-1.33896	1.03e-05	0.000178323	down	1421	BETA-OHASE 1	Beta-carotene 3-hydroxylase 1, chloroplastic [Source:UniProtKB/Swiss-Prot;Acc:Q9SZZ8]
AT3G44890	445.276	298.981	591.571	-0.984498	1.33e-07	3.18e-06	down	1216	RPL9	RPL9 [Source:UniProtKB/TrEMBL;Acc:A0A178VBQ7]
AT3G12090	1247.23	1026.63	1467.82	-0.515762	0.00194813	0.0184921	down	1202	TET6	TET6 [Source:UniProtKB/TrEMBL;Acc:A0A178VCX6]
AT4G11960	300.651	171.339	429.962	-1.32735	1.98e-08	5.4e-07	down	1460	PGRL1B	PGR5-like protein 1B, chloroplastic [Source:UniProtKB/Swiss-Prot;Acc:Q8GYC7]
AT1G14730	1617.29	1312.15	1922.43	-0.551001	0.00190427	0.0181308	down	1118	CYB561C	Probable transmembrane ascorbate ferrireductase 3 [Source:UniProtKB/Swiss-Prot;Acc:Q67ZF6]
AT3G46970	846.81	661.949	1031.67	-0.640192	0.000188544	0.00246904	down	3168	PHS2	Alpha-glucan phosphorylase 2, cytosolic [Source:UniProtKB/Swiss-Prot;Acc:Q9SD76]
AT4G27030	171.802	33.4539	310.15	-3.21272	4.66e-13	2.13e-11	down	1258	FAD4	FADA [Source:UniProtKB/TrEMBL;Acc:A0A178UUY9]
AT3G54050	105.95	3.65583	208.245	-5.83194	8.56e-51	3.29e-48	down	1500	CFBP1	Fructose-1,6-bisphosphatase 1, chloroplastic [Source:UniProtKB/Swiss-Prot;Acc:P25851]
AT5G55530	1307.19	1084.41	1529.97	-0.496585	0.00301702	0.0267405	down	2021		At5g55530 [Source:UniProtKB/TrEMBL;Acc:Q5HZ03]
AT5G59760	41.1739	24.2282	58.1195	-1.26233	0.00142746	0.0141177	down	973		Putative uncharacterized protein [Source:UniProtKB/TrEMBL;Acc:Q58FT1]
AT3G19810	178.983	132.277	225.688	-0.770767	0.00071513	0.00786234	down	1460		Large ribosomal RNA subunit accumulation protein YCED homolog 1, chloroplastic [Source:UniProtKB/Swiss-Prot;Acc:Q9LT27]
AT2G18500	295.208	200.56	389.856	-0.95891	1.31e-06	2.66e-05	down	1317	OFP7	Transcription repressor OFP7 [Source:UniProtKB/Swiss-Prot;Acc:Q9ZU65]
AT1G76100	40.5649	5.62639	75.5034	-3.74626	4.28e-16	2.53e-14	down	936	PETE1	plastocyanin 1 [Source:TAIR;Acc:AT1G76100]
AT5G38660	368.929	280.168	457.69	-0.70808	0.000265527	0.00336271	down	1892	APE1	Acclimation of photosynthesis to environment [Source:UniProtKB/TrEMBL;Acc:A0A219HZL6]
AT4G28490	316.466	241.182	391.749	-0.699808	0.000423506	0.00502979	down	3710	RLK5	Receptor-like protein kinase 5 [Source:UniProtKB/Swiss-Prot;Acc:P47735]
AT4G21320	117.633	80.3275	154.939	-0.947736	0.0037369	0.0319328	down	1334	HSA32	HSA32 [Source:UniProtKB/TrEMBL;Acc:A0A178UV51]
AT3G10840	23.215	11.6947	34.7354	-1.57055	0.00160681	0.0156991	down	2536		Alpha/beta-Hydrolases superfamily protein [Source:UniProtKB/TrEMBL;Acc:A4IJ41]
AT3G61250	28.7657	13.4623	44.0691	-1.71084	0.000181532	0.00239098	down	1677	AtMYB17	Transcription factor MYB41 [Source:UniProtKB/Swiss-Prot;Acc:Q9M2D9]
AT3G02730	116.526	55.0158	178.037	-1.69426	8.91e-08	2.19e-06	down	943	TRXF1	TRXF1 [Source:UniProtKB/TrEMBL;Acc:A0A178VBJ7]
AT5G02250	624.024	497.473	750.575	-0.593378	0.0010548	0.0110019	down	3086	RNR1	Ribonuclease II, chloroplastic/mitochondrial [Source:UniProtKB/Swiss-Prot;Acc:Q6NQJ6]
AT5G26820	1031.62	497.281	1565.96	-1.65492	5.24e-08	1.34e-06	down	2239	IREG3	Solute carrier family 40 member 3, chloroplastic [Source:UniProtKB/Swiss-Prot;Acc:Q8W4E7]
AT5G24460	669.435	503.27	835.6	-0.731479	2.81e-05	0.000448149	down	1289		RING-H2 zinc finger protein [Source:UniProtKB/TrEMBL;Acc:Q9FGE4]
AT5G58760	666.694	386.436	946.952	-1.29306	1.67e-06	3.33e-05	down	2187	DDB2	Protein DAMAGED DNA-BINDING 2 [Source:UniProtKB/Swiss-Prot;Acc:Q6NQ88]
AT2G46535	1287	976.507	1597.5	-0.710111	2.26e-05	0.000369097	down	890		Uncharacterized protein At2g46535 [Source:UniProtKB/TrEMBL;Acc:Q84JE7]
AT5G48300	1191.86	883.24	1500.47	-0.764537	0.000696339	0.00767599	down	1898	APS1	Glucose-1-phosphate adenylyltransferase small subunit, chloroplastic [Source:UniProtKB/Swiss-Prot;Acc:P55228]
AT5G45680	10.2673	0	20.5346	#NAME?	1.93e-08	5.29e-07	down	896	FKBP13	Peptidyl-prolyl cis-trans isomerase FKBP13, chloroplastic [Source:UniProtKB/Swiss-Prot;Acc:Q9SCY2]
AT1G22850	311.802	241.722	381.882	-0.659776	0.00110246	0.011437	down	1123		At1g22850/F29G20_19 [Source:UniProtKB/TrEMBL;Acc:O23137]
AT2G18710	738.525	520.395	956.654	-0.878389	0.00290038	0.0258934	down	1836	SCY1	SCY1 [Source:UniProtKB/TrEMBL;Acc:A0A178VZD7]
AT3G53460	2460.07	1567.23	3352.91	-1.0972	1.32e-05	0.000223918	down	1533	CP29	Chloroplast RNA-binding protein 29 [Source:UniProtKB/TrEMBL;Acc:F4JAF3]
AT3G20270	183.251	142.047	224.454	-0.660057	0.00333514	0.029147	down	2952		Lipid-binding serum glycoprotein family protein [Source:UniProtKB/TrEMBL;Acc:F4JDK0]
AT1G76730	166.025	34.5599	297.491	-3.10568	6.39e-22	5.77e-20	down	1500	COG0212	COG0212 [Source:UniProtKB/TrEMBL;Acc:A0A178WEK7]
AT2G22920	1795.77	1378.44	2213.09	-0.683025	0.000280827	0.00352435	down	1425	SCPL12	Serine carboxypeptidase-like 12 [Source:UniProtKB/Swiss-Prot;Acc:O81009]
AT3G52150	429.89	238.879	620.901	-1.37808	4.32e-13	1.98e-11	down	1131	PSRP2	PSRP2 [Source:UniProtKB/TrEMBL;Acc:A0A178VFQ5]
AT5G23120	273.508	56.6125	490.404	-3.11478	8.27e-34	1.48e-31	down	1668	HCF136	photosystem II stability/assembly factor, chloroplast (HCF136) [Source:TAIR;Acc:AT5G23120]
AT4G35450	2579.84	2036.79	3122.9	-0.616591	0.000120433	0.00165601	down	1530	AKR2	Ankyrin repeat-containing protein 2 [Source:UniProtKB/TrEMBL;Acc:F4JN13]
AT5G46450	159.188	80.858	237.517	-1.55457	6.91e-11	2.55e-09	down	3555		Disease resistance protein (TIR-NBS-LRR class) family [Source:UniProtKB/TrEMBL;Acc:Q9FHG0]
AT5G05170	18409.4	15259.1	21559.7	-0.498668	0.00138221	0.013738	down	3825	CESA3	Cellulose synthase A catalytic subunit 3 [UDP-forming] [Source:UniProtKB/Swiss-Prot;Acc:Q941L0]
AT4G33470	110.05	62.2031	157.896	-1.34391	4.7e-07	1.05e-05	down	1562	HDA14	Histone deacetylase [Source:UniProtKB/TrEMBL;Acc:A0A178V1U6]
AT2G24790	2397.69	1797.49	2997.89	-0.737964	6.03e-06	0.000109532	down	966	COL3	Zinc finger protein CONSTANS-LIKE 3 [Source:UniProtKB/Swiss-Prot;Acc:Q9SK53]
AT2G24420	2093.82	1768.08	2419.55	-0.452551	0.00457199	0.0377205	down	1957		AT2G24420 protein [Source:UniProtKB/TrEMBL;Acc:Q9ZQ26]
AT5G65640	2002.22	1433.76	2570.67	-0.842334	1.38e-06	2.8e-05	down	1426	BHLH93	Transcription factor bHLH93 [Source:UniProtKB/Swiss-Prot;Acc:Q9LSL1]
AT5G21430	7.01166	0	14.0233	#NAME?	0.000504721	0.00580417	down	977	ndhU	NdhU [Source:UniProtKB/TrEMBL;Acc:A0A178UN62]
AT2G39670	685.948	501.428	870.467	-0.795747	6.04e-06	0.000109614	down	1722		Radical SAM superfamily protein [Source:UniProtKB/TrEMBL;Acc:F4IVY6]
AT1G01170	11.53	3.4903	19.5697	-2.4872	0.00111667	0.0115414	down	509		At1g01170 [Source:UniProtKB/TrEMBL;Acc:Q2HIQ2]
AT2G08650	7.54366	1.372	13.7153	-3.32144	0.000828319	0.00894943	down	937
AT1G47980	4.36134	0.331537	8.39114	-4.66163	0.00294975	0.0262279	down	1191		unknown protein; FUNCTIONS IN: molecular_function unknown; INVOLVED IN: biological_process unknown; LOCATED IN: endomembrane system; EXPRESSED IN: 6 plant structures; EXPRESSED DURING: 4 anthesis, F mature embryo stage, petal differentiation and exp /.../ stage, E expanded cotyledon stage; BEST Arabidopsis thaliana protein match is: unknown protein (TAIR:AT3G62730.1); Ha. [Source:TAIR;Acc:AT1G479…
AT1G48840	652.96	530.362	775.559	-0.548258	0.00220104	0.0205342	down	2638		Heat-inducible transcription repressor (DUF639) [Source:UniProtKB/TrEMBL;Acc:Q8VXZ2]
AT4G37550	650.343	496.268	804.418	-0.696826	7.23e-05	0.00106053	down	1761		Acetamidase/Formamidase family protein [Source:TAIR;Acc:AT4G37550]
AT1G21600	554.792	347.919	761.665	-1.1304	8.56e-10	2.8e-08	down	1447	PTAC6	AT1G21600 protein [Source:UniProtKB/TrEMBL;Acc:Q9XI19]
AT3G19040	65.783	45.47	86.0959	-0.921029	0.00293393	0.0261476	down	5505	TAF1	Histone acetyltransferase of the TAFII250 family 2 [Source:UniProtKB/TrEMBL;Acc:A0A1I9LSR7]
AT1G13670	989.131	338.827	1639.43	-2.27458	4.16e-35	8.26e-33	down	1248		At1g13670 [Source:UniProtKB/TrEMBL;Acc:Q9LMY0]
AT5G62890	4280.21	3522.75	5037.68	-0.516056	0.00109316	0.0113547	down	2113	NAT6	Nucleobase-ascorbate transporter 6 [Source:UniProtKB/Swiss-Prot;Acc:Q27GI3]
AT1G75690	58.4523	10.4869	106.418	-3.34307	1.45e-18	1.03e-16	down	1358	LQY1	LQY1 [Source:UniProtKB/TrEMBL;Acc:A0A178W9N8]
AT2G28320	1655.4	1340	1970.79	-0.556541	0.000565973	0.00638814	down	2974		Pleckstrin homology (PH) and lipid-binding START domains-containing protein [Source:UniProtKB/TrEMBL;Acc:F4IHT0]
AT3G14650	849.204	692.285	1006.12	-0.539369	0.00135248	0.0134827	down	2143	CYP72A11	Cytochrome P450 72A11 [Source:UniProtKB/Swiss-Prot;Acc:Q9LUC9]
AT2G29630	467.244	60.5191	873.969	-3.85212	8.63e-72	6.75e-69	down	2979	THIC	Phosphomethylpyrimidine synthase, chloroplastic [Source:UniProtKB/Swiss-Prot;Acc:O82392]
AT4G32260	856.419	450.108	1262.73	-1.4882	1.69e-17	1.1e-15	down	1117		PDE334 [Source:UniProtKB/TrEMBL;Acc:A0A178V017]
AT2G29980	4414.18	2985.07	5843.29	-0.969018	8.21e-10	2.7e-08	down	1597	FAD3	FAD3 [Source:UniProtKB/TrEMBL;Acc:A0A178VX43]
AT5G54960	2181.6	822.299	3540.9	-2.10638	2.5e-27	3.26e-25	down	2280	PDC2	Pyruvate decarboxylase 2 [Source:UniProtKB/Swiss-Prot;Acc:Q9FFT4]
AT4G23500	932.965	722.895	1143.03	-0.661012	0.00012063	0.00165753	down	1877		Pectin lyase-like superfamily protein [Source:UniProtKB/TrEMBL;Acc:O81746]
AT2G01610	646.079	379.329	912.829	-1.26689	0.000118819	0.0016374	down	1108		At2g01610 [Source:UniProtKB/TrEMBL;Acc:Q9ZNU5]
AT2G43540	436.159	335.921	536.396	-0.675176	0.00028967	0.00361719	down	974		At2g43540 [Source:UniProtKB/TrEMBL;Acc:O22868]
AT5G44390	312.809	214.182	411.435	-0.941826	1.17e-06	2.4e-05	down	1985		Berberine bridge enzyme-like 25 [Source:UniProtKB/Swiss-Prot;Acc:Q9FKU9]
AT3G16000	271.907	154.717	389.098	-1.33051	1.48e-10	5.29e-09	down	2702	MFP1	MAR-binding filament-like protein 1 [Source:UniProtKB/Swiss-Prot;Acc:Q9LW85]
AT4G15480	541.223	6.81373	1075.63	-7.30253	7.81e-08	1.95e-06	down	1716	UGT84A1	UDP-glycosyltransferase 84A1 [Source:UniProtKB/Swiss-Prot;Acc:Q5XF20]
AT2G01110	325.537	219.656	431.417	-0.973837	1.04e-06	2.16e-05	down	1719	TATC	UNE3 [Source:UniProtKB/TrEMBL;Acc:A0A178VUB7]
AT5G43260	271.449	205.739	337.159	-0.712617	0.000470201	0.00547772	down	964		Chaperone protein dnaJ-like protein [Source:UniProtKB/TrEMBL;Acc:Q94CB5]
AT5G03885	33.0487	17.5125	48.5849	-1.47212	0.000579747	0.00651714	down	1204
AT5G03880	754.329	626.88	881.777	-0.492224	0.0045637	0.0376724	down	1340		Thioredoxin family protein [Source:UniProtKB/TrEMBL;Acc:Q940I2]
AT1G20450	7012.37	5613.36	8411.39	-0.58348	0.000230555	0.00295422	down	1562	ERD10	Dehydrin ERD10 [Source:UniProtKB/Swiss-Prot;Acc:P42759]
AT3G48690	1031.71	268.718	1794.7	-2.73958	9.83e-09	2.8e-07	down	1189	CXE12	Probable carboxylesterase 12 [Source:UniProtKB/Swiss-Prot;Acc:Q9SMN0]
AT4G15810	188.864	138.18	239.547	-0.793757	0.000373819	0.00451471	down	2922		P-loop containing nucleoside triphosphate hydrolases superfamily protein [Source:UniProtKB/TrEMBL;Acc:F4JKW7]
AT4G24240	1622.61	1266.11	1979.11	-0.644452	0.00010091	0.00142516	down	1864	WRKY7	Probable WRKY transcription factor 7 [Source:UniProtKB/Swiss-Prot;Acc:Q9STX0]
AT2G24820	192.727	65.3208	320.132	-2.29306	1.85e-16	1.12e-14	down	1825	TIC55	Protein TIC 55, chloroplastic [Source:UniProtKB/Swiss-Prot;Acc:Q9SK50]
AT4G22160	339.5	271.091	407.909	-0.589469	0.00262665	0.0238487	down	852		Uncharacterized protein At4g22160 [Source:UniProtKB/Swiss-Prot;Acc:Q8L8L9]
AT2G36870	236.82	68.4243	405.216	-2.56611	3.05e-06	5.85e-05	down	1268	XTH32	Probable xyloglucan endotransglucosylase/hydrolase protein 32 [Source:UniProtKB/Swiss-Prot;Acc:Q9SJL9]
AT1G02300	264.786	146.485	383.086	-1.38692	3.96e-06	7.42e-05	down	1464	CATHB1	Cathepsin B-like protease 1 [Source:UniProtKB/Swiss-Prot;Acc:F4HVZ1]
AT3G27925	401.822	285.493	518.152	-0.859919	6.87e-06	0.000123501	down	1623	DEGP1	DEGP1 [Source:UniProtKB/TrEMBL;Acc:A0A178V823]
AT1G06680	593.41	30.2379	1156.58	-5.25737	1.7e-116	1.06e-112	down	1210	PSBP1	Oxygen-evolving enhancer protein 2-1, chloroplastic [Source:UniProtKB/Swiss-Prot;Acc:Q42029]
AT5G57800	486.331	378.503	594.16	-0.650546	0.000438383	0.00516966	down	2589	CER3	Protein ECERIFERUM 3 [Source:UniProtKB/Swiss-Prot;Acc:Q8H1Z0]
AT1G74370	78.2153	50.4423	105.988	-1.0712	0.000353188	0.00430504	down	1159		At1g74370 [Source:UniProtKB/TrEMBL;Acc:Q9CA76]
AT1G47128	17684.9	12013.1	23356.7	-0.959226	0.000226898	0.00291184	down	1919	RD21A	RD21A [Source:UniProtKB/TrEMBL;Acc:A0A178WIH7]
AT2G18790	2742.15	2252.34	3231.96	-0.520983	0.000701168	0.00772242	down	4321	PHYB	Phytochrome [Source:UniProtKB/TrEMBL;Acc:A0A178W0V4]
AT2G02950	95.5403	33.6187	157.462	-2.22767	2.83e-06	5.44e-05	down	2649	PKS1	Protein PHYTOCHROME KINASE SUBSTRATE 1 [Source:UniProtKB/Swiss-Prot;Acc:Q9SWI1]
AT2G03390	593.834	452.738	734.93	-0.69893	9.37e-05	0.00133383	down	1404	CLPF	Clp protease adapter protein ClpF, chloroplastic [Source:UniProtKB/Swiss-Prot;Acc:Q67Y99]
AT1G45191	39.5189	10.8011	68.2367	-2.65937	0.00369094	0.0316265	down	1766	BGLU1	Glycosyl hydrolase superfamily protein [Source:TAIR;Acc:AT1G45191]
AT1G65260	864.278	701.666	1026.89	-0.549427	0.00133047	0.0133004	down	1611	VIPP1	Membrane-associated protein VIPP1, chloroplastic [Source:UniProtKB/Swiss-Prot;Acc:O80796]
AT1G15500	7504.67	4995.53	10013.8	-1.00328	9.34e-11	3.4e-09	down	2180	AATP2	ADP,ATP carrier protein [Source:UniProtKB/TrEMBL;Acc:A0A178WDN7]
AT5G04000	104.852	31.9627	177.742	-2.47532	2.09e-08	5.67e-07	down	776		unknown protein; Ha. [Source:TAIR;Acc:AT5G04000]
AT5G09230	363.511	230.563	496.458	-1.10651	1.21e-08	3.39e-07	down	1406	SRT2	sirtuin 2 [Source:TAIR;Acc:AT5G09230]
AT4G00030	1037.76	861.184	1214.34	-0.495774	0.00404206	0.0340519	down	724	PAP11	Probable plastid-lipid-associated protein 11, chloroplastic [Source:UniProtKB/Swiss-Prot;Acc:O81304]
AT1G50290	85.2553	48.6199	121.891	-1.32597	5.28e-06	9.68e-05	down	902		At1g50290/F14I3_12 [Source:UniProtKB/TrEMBL;Acc:Q944R3]
AT3G62930	226.261	160.898	291.625	-0.85797	0.00369063	0.0316265	down	486	GRXS6	Monothiol glutaredoxin-S6 [Source:UniProtKB/Swiss-Prot;Acc:Q9LYC8]
AT3G17930	215.626	130.38	300.872	-1.20643	2.72e-08	7.28e-07	down	819		AT3g17930/MEB5_15 [Source:UniProtKB/TrEMBL;Acc:Q94BY7]
AT5G06130	717.179	546.257	888.101	-0.701145	8.17e-05	0.00117913	down	1539	ORLIKE	Protein ORANGE-LIKE, chloroplastic [Source:UniProtKB/Swiss-Prot;Acc:Q8VYD8]
AT1G53670	588.606	335.622	841.589	-1.32628	3.32e-08	8.78e-07	down	815	MSRB1	Peptide methionine sulfoxide reductase B1, chloroplastic [Source:UniProtKB/Swiss-Prot;Acc:Q9C8M2]
AT4G13590	872.037	730.423	1013.65	-0.472758	0.00574574	0.0459439	down	1457	PAM71-HL	Protein PAM71-homolog, chloroplastic [Source:UniProtKB/Swiss-Prot;Acc:Q9T0H9]
AT1G52100	142.716	3.25086	282.181	-6.43966	3.22e-08	8.53e-07	down	1832		Mannose-binding lectin superfamily protein [Source:TAIR;Acc:AT1G52100]
AT2G40080	3533.69	1707.59	5359.79	-1.65022	1.59e-24	1.67e-22	down	660	ELF4	Protein EARLY FLOWERING 4 [Source:UniProtKB/Swiss-Prot;Acc:O04211]
AT1G54500	258.477	70.4752	446.479	-2.6634	3.88e-32	6.34e-30	down	926		At1g54500/F20D21_31 [Source:UniProtKB/TrEMBL;Acc:Q9SLI4]
AT4G02725	193.695	152.926	234.464	-0.616527	0.00475656	0.0390325	down	2792		At4g02725 [Source:UniProtKB/TrEMBL;Acc:Q6DBF6]
AT5G16715	645.483	503.545	787.422	-0.645018	0.000302822	0.00375704	down	3394	EMB2247	Valine--tRNA ligase, chloroplastic/mitochondrial 2 [Source:UniProtKB/Swiss-Prot;Acc:F4KE63]
AT2G37970	48.6645	14.3364	82.9927	-2.5333	0.00235694	0.0217843	down	836	SOUL-1	SOUL heme-binding family protein [Source:TAIR;Acc:AT2G37970]
AT4G09010	58.6652	11.2528	106.078	-3.23677	1.21e-17	7.99e-16	down	1300	APX4	ascorbate peroxidase 4 [Source:TAIR;Acc:AT4G09010]
AT5G30510	982.895	655.307	1310.48	-0.999857	6.37e-09	1.86e-07	down	1588	RPS1	30S ribosomal protein S1, chloroplastic [Source:UniProtKB/Swiss-Prot;Acc:Q93VC7]
AT1G26761	8.86921	0.331537	17.4069	-5.71434	2.01e-06	3.97e-05	down	1619		Arabinanase/levansucrase/invertase [Source:UniProtKB/TrEMBL;Acc:Q93ZE3]
AT3G23805	247.208	177.65	316.765	-0.834373	0.00123986	0.0125858	down	913	RALFL24	Protein RALF-like 24 [Source:UniProtKB/Swiss-Prot;Acc:Q9LK37]
AT5G08280	776.507	644.805	908.21	-0.494164	0.00297296	0.0263874	down	1643	HEMC	Porphobilinogen deaminase, chloroplastic [Source:UniProtKB/Swiss-Prot;Acc:Q43316]
AT1G05140	289.354	179.495	399.213	-1.15322	1.21e-08	3.39e-07	down	1514	ARASP2	Probable membrane metalloprotease ARASP2, chloroplastic [Source:UniProtKB/Swiss-Prot;Acc:O23053]
AT3G16420	64888.4	50797.2	78979.7	-0.636732	0.000734014	0.00804873	down	1299	PBP1	PYK10-binding protein 1 [Source:UniProtKB/Swiss-Prot;Acc:O04314]
AT2G34860	235.464	121.543	349.385	-1.52335	7.37e-10	2.45e-08	down	947	PSA2	Protein PHOTOSYSTEM I ASSEMBLY 2, chloroplastic [Source:UniProtKB/Swiss-Prot;Acc:O64750]
AT2G22590	730.232	1.28923	1459.17	-10.1444	9.12e-10	2.97e-08	down	1624	UGT91A1	UDP-glycosyltransferase 91A1 [Source:UniProtKB/Swiss-Prot;Acc:Q940V3]
AT1G03590	842.025	682.797	1001.25	-0.552278	0.00139249	0.013821	down	2219	PPC6-6	Probable protein phosphatase 2C 1 [Source:UniProtKB/Swiss-Prot;Acc:Q9LR65]
AT3G51750	48.4639	14.4281	82.4997	-2.51551	1.13e-06	2.33e-05	down	592		Uncharacterized protein At3g51750 [Source:UniProtKB/TrEMBL;Acc:Q9SCT3]
AT3G10060	113.196	69.8604	156.533	-1.16392	6.06e-06	0.000109936	down	1123	FKBP16-4	Peptidylprolyl isomerase [Source:UniProtKB/TrEMBL;Acc:A0A178V516]
AT3G56010	162.047	88.824	235.269	-1.40529	3.79e-07	8.55e-06	down	1119		Transmembrane protein [Source:UniProtKB/TrEMBL;Acc:Q9LY44]
AT2G39730	986.507	98.6092	1874.4	-4.24857	4.59e-102	1.27e-98	down	1964	RCA	Ribulose bisphosphate carboxylase/oxygenase activase, chloroplastic [Source:UniProtKB/Swiss-Prot;Acc:P10896]
AT1G06190	553.769	424.392	683.146	-0.686795	0.000173008	0.00229564	down	1641		Rho termination factor [Source:TAIR;Acc:AT1G06190]
AT5G44574	43.3855	10.0646	76.7064	-2.93006	1.1e-09	3.56e-08	down	1022		unknown protein; FUNCTIONS IN: molecular_function unknown; INVOLVED IN: biological_process unknown; LOCATED IN: endomembrane system; Ha. [Source:TAIR;Acc:AT5G44574]
AT5G44572	31.8697	13.5549	50.1845	-1.88843	2.67e-05	0.000428038	down	1376		Transmembrane protein [Source:UniProtKB/TrEMBL;Acc:Q0WML3]
AT1G66330	781.643	445.073	1118.21	-1.32908	1.93e-14	9.96e-13	down	1661	AAF	Senescence-associated protein AAF, chlorolplastic [Source:UniProtKB/Swiss-Prot;Acc:Q9C8Y4]
AT2G47450	305.199	43.9533	566.445	-3.68789	6.09e-10	2.06e-08	down	1815	CAO	Signal recognition particle 43 kDa protein, chloroplastic [Source:UniProtKB/Swiss-Prot;Acc:O22265]
AT5G17670	124.532	73.5935	175.471	-1.25358	1.07e-06	2.21e-05	down	1179		Alpha/beta-Hydrolases superfamily protein [Source:UniProtKB/TrEMBL;Acc:Q9FN84]
AT3G61870	220.9	38.7582	403.043	-3.37836	1.43e-43	3.98e-41	down	1299		AT3g61870/F21F14_40 [Source:UniProtKB/TrEMBL;Acc:Q9M277]
AT3G53920	333.616	257.474	409.757	-0.670339	0.000506356	0.00581496	down	2175	SIGC	RNA polymerase sigma factor sigC [Source:UniProtKB/Swiss-Prot;Acc:O24621]
AT4G13280	1846.95	1107.88	2586.02	-1.22293	1.13e-13	5.46e-12	down	1643	TPS12	(Z)-gamma-bisabolene synthase 1 [Source:UniProtKB/Swiss-Prot;Acc:Q9T0J9]
AT4G12480	3127.4	1472.93	4781.87	-1.69888	0.000452217	0.00530031	down	930	EARLI1	PEARLI 1 [Source:UniProtKB/TrEMBL;Acc:A0A178V1J0]
AT4G24770	1154.25	698.566	1609.93	-1.20453	1.53e-12	6.74e-11	down	1582	CP31A	31 kDa ribonucleoprotein, chloroplastic [Source:UniProtKB/Swiss-Prot;Acc:Q04836]
AT2G26870	35.8617	20.653	51.0704	-1.30613	0.00137144	0.01365	down	1862	NPC2	Non-specific phospholipase C2 [Source:UniProtKB/Swiss-Prot;Acc:O81020]
AT1G32540	8.46414	1.9523	14.976	-2.9394	0.00132291	0.013246	down	1645	LOL1	lsd one like 1 [Source:TAIR;Acc:AT1G32540]
AT1G01470	2058.23	1421.02	2695.43	-0.923588	0.00325617	0.0285365	down	1348	LEA14	LSR3 [Source:UniProtKB/TrEMBL;Acc:A0A178W160]
AT5G17010	1691.14	670.016	2712.26	-2.01723	3.15e-10	1.09e-08	down	2053		D-xylose-proton symporter-like 2 [Source:UniProtKB/Swiss-Prot;Acc:Q6AWX0]
AT4G37760	978.106	63.338	1892.87	-4.90136	1.21e-47	3.88e-45	down	2196	SQE3	Squalene epoxidase 3 [Source:UniProtKB/Swiss-Prot;Acc:Q8VYH2]
AT5G54770	1385.18	186.438	2583.92	-3.7928	8.28e-09	2.38e-07	down	1606	THI1	Thiamine thiazole synthase, chloroplastic [Source:UniProtKB/TrEMBL;Acc:A0A178UNL2]
AT5G15410	440.932	335.151	546.714	-0.705975	0.000271897	0.00343123	down	2553	CNGC2	Cyclic nucleotide-gated ion channel 2 [Source:UniProtKB/Swiss-Prot;Acc:O65718]
AT4G15560	3242.47	1842.78	4642.17	-1.33292	3.37e-07	7.69e-06	down	2960	DXS	DXS1 [Source:UniProtKB/TrEMBL;Acc:A0A178V5I0]
AT3G29290	153.115	116.137	190.094	-0.710888	0.00244124	0.0224238	down	2399	EMB2076	Pentatricopeptide repeat-containing protein At3g29290 [Source:UniProtKB/Swiss-Prot;Acc:Q84J46]
AT1G18060	216.571	69.4686	363.673	-2.38821	1.58e-25	1.87e-23	down	1191		AT1g18060/T10F20.23 [Source:UniProtKB/TrEMBL;Acc:Q9LM40]
AT2G01900	274.359	176.295	372.423	-1.07895	1.07e-07	2.61e-06	down	1840		DNAse I-like superfamily protein [Source:TAIR;Acc:AT2G01900]
AT1G32060	230.593	2.32076	458.865	-7.62733	8.62e-99	1.96e-95	down	1890	PRK	Phosphoribulokinase [Source:UniProtKB/TrEMBL;Acc:A0A178WLP9]
AT4G18422	35.216	1.67594	68.7561	-5.35844	4.06e-07	9.11e-06	down	489		unknown protein; FUNCTIONS IN: molecular_function unknown; INVOLVED IN: biological_process unknown; LOCATED IN: cellular_component unknown; Ha. [Source:TAIR;Acc:AT4G18422]
AT5G21920	113.234	74.2948	152.173	-1.03438	0.000154293	0.00207148	down	812	YLMG2	YlmG homolog protein 2, chloroplastic [Source:UniProtKB/Swiss-Prot;Acc:Q9C595]
AT5G42810	582.948	472.705	693.19	-0.55231	0.00147595	0.0145455	down	1849	IPK1	Inositol-pentakisphosphate 2-kinase [Source:UniProtKB/Swiss-Prot;Acc:Q93YN9]
AT2G22990	108.509	30.7452	186.273	-2.59898	0.00148042	0.0145838	down	1730	SNG1	sinapoylglucose 1 [Source:TAIR;Acc:AT2G22990]
AT5G24160	193.929	49.4336	338.424	-2.77527	6.38e-15	3.44e-13	down	1894	SQE6	Squalene epoxidase 6 [Source:UniProtKB/Swiss-Prot;Acc:O65402]
AT3G58010	396.468	318.001	474.935	-0.578697	0.00213534	0.0200034	down	1371	PAP9	Probable plastid-lipid-associated protein 9, chloroplastic [Source:UniProtKB/Swiss-Prot;Acc:Q9M2P7]
AT2G30695	123.536	87.4536	159.619	-0.868043	0.000350983	0.00428233	down	1085		At2g30700/T11J7.9 [Source:UniProtKB/TrEMBL;Acc:Q945Q5]
AT5G26280	19364.4	12961	25767.9	-0.991395	0.00113456	0.0117118	down	1324		TRAF-like family protein [Source:TAIR;Acc:AT5G26280]
AT2G16740	1342.92	1129.46	1556.38	-0.462562	0.00372506	0.0318643	down	923	UBC29	UBC29 [Source:UniProtKB/TrEMBL;Acc:A0A178VQZ9]
AT2G39310	14468.6	9100.39	19836.9	-1.12418	3.97e-09	1.19e-07	down	1704	JAL22	Jacalin-related lectin 22 [Source:UniProtKB/Swiss-Prot;Acc:O80950]
AT4G32190	413.114	260.432	565.797	-1.11937	6.02e-09	1.76e-07	down	2772		Myosin heavy chain-related protein [Source:UniProtKB/TrEMBL;Acc:Q8H1E5]
AT1G36160	11020.5	7842.38	14198.6	-0.85639	3.05e-08	8.12e-07	down	7410	ACC1	Acetyl-CoA carboxylase 1 [Source:UniProtKB/Swiss-Prot;Acc:Q38970]
AT5G52060	2886.89	2259.25	3514.53	-0.637487	5.8e-05	0.000867659	down	2121	BAG1	BAG family molecular chaperone regulator 1 [Source:UniProtKB/Swiss-Prot;Acc:Q0WUQ1]
AT1G72645	12.6567	0.708921	24.6044	-5.11715	3e-08	8.02e-07	down	959		At1g72645 [Source:UniProtKB/TrEMBL;Acc:Q8RXY2]
AT2G46930	845.012	595.935	1094.09	-0.876503	3.74e-07	8.45e-06	down	1730	PAE3	Pectin acetylesterase 3 [Source:UniProtKB/Swiss-Prot;Acc:O80731]
AT5G13360	344.484	188.849	500.119	-1.40504	1.16e-12	5.16e-11	down	2235		Auxin-responsive GH3 family protein [Source:UniProtKB/TrEMBL;Acc:F4K2J2]
AT1G65960	4953.02	3818.52	6087.53	-0.672844	1.69e-05	0.000282044	down	2971	GAD2	Glutamate decarboxylase 2 [Source:UniProtKB/Swiss-Prot;Acc:Q42472]
AT1G64380	285.949	102.262	469.636	-2.19927	7.45e-05	0.00108841	down	1624	ERF061	Ethylene-responsive transcription factor ERF061 [Source:UniProtKB/Swiss-Prot;Acc:Q9C7W2]
AT2G42300	461.018	371.766	550.27	-0.565743	0.00227281	0.0211093	down	2466	BHLH48	Transcription factor bHLH48 [Source:UniProtKB/Swiss-Prot;Acc:Q8VZ02]
AT4G37480	416.702	323.791	509.613	-0.65434	0.00054173	0.00616857	down	1730		Chaperone DnaJ-domain superfamily protein [Source:UniProtKB/TrEMBL;Acc:F4JS27]
AT2G21330	101.772	1.39025	202.154	-7.18396	4.68e-36	9.52e-34	down	1699	FBA1	Fructose-bisphosphate aldolase 1, chloroplastic [Source:UniProtKB/Swiss-Prot;Acc:Q9SJU4]
AT1G60600	74.1239	22.6342	125.614	-2.47242	2.05e-14	1.05e-12	down	1842	ABC4	2-carboxy-1,4-naphthoquinone phytyltransferase, chloroplastic [Source:UniProtKB/Swiss-Prot;Acc:Q0WUA3]
AT5G46390	157.574	115.81	199.338	-0.783456	0.00072958	0.00800714	down	1788	CTPA1	Carboxyl-terminal-processing peptidase 1, chloroplastic [Source:UniProtKB/Swiss-Prot;Acc:F4KHG6]
AT5G65870	160.751	94.745	226.756	-1.25902	1.04e-07	2.53e-06	down	1102	PSK5	Phytosulfokines 5 [Source:UniProtKB/Swiss-Prot;Acc:Q9FEB4]
AT3G27110	601.6	439.13	764.07	-0.799055	6.43e-06	0.000115939	down	1170		AT3G27110 protein [Source:UniProtKB/TrEMBL;Acc:Q9LSC4]
AT3G46530	86.766	44.6214	128.911	-1.53056	7.38e-08	1.84e-06	down	3163	RPP13	Disease resistance protein RPP13 [Source:UniProtKB/Swiss-Prot;Acc:Q9M667]
AT1G07985	67.8954	28.3892	107.402	-1.9196	2.24e-09	6.96e-08	down	942		Expressed protein [Source:UniProtKB/TrEMBL;Acc:Q3EDG6]
AT5G63580	221.847	112.818	330.875	-1.55229	1.34e-12	5.9e-11	down	1334	FLS2	Putative inactive flavonol synthase 2 [Source:UniProtKB/Swiss-Prot;Acc:B2GVM7]
AT4G36530	290.384	42.2646	538.504	-3.67144	1.79e-41	4.58e-39	down	1590		Alpha/beta-Hydrolases superfamily protein [Source:UniProtKB/TrEMBL;Acc:O23227]
AT5G66400	35.2232	17.7337	52.7126	-1.57165	0.00319543	0.028083	down	975	RAB18	RAB18 [Source:UniProtKB/TrEMBL;Acc:A0A178UN24]
AT3G18960	53.1754	30.9384	75.4124	-1.2854	0.00262687	0.0238487	down	736		B3 domain-containing protein At3g18960 [Source:UniProtKB/Swiss-Prot;Acc:Q84R27]
AT1G08980	414.165	230.808	597.522	-1.3723	5.5e-05	0.000827863	down	1573	AMI1	Amidase 1 [Source:UniProtKB/Swiss-Prot;Acc:Q9FR37]
AT5G59720	57.8367	36.679	78.9944	-1.1068	0.00130713	0.0131249	down	978	HSP18.1	18.1 kDa class I heat shock protein [Source:UniProtKB/Swiss-Prot;Acc:P19037]
AT5G20070	1555.63	1016.22	2095.03	-1.04376	1.69e-10	6.02e-09	down	1562	NUDT19	Nudix hydrolase 19, chloroplastic [Source:UniProtKB/Swiss-Prot;Acc:Q94A82]
AT1G07700	287.389	164.621	410.158	-1.31703	5.95e-11	2.22e-09	down	1328		Thioredoxin superfamily protein [Source:TAIR;Acc:AT1G07700]
AT4G33010	2915.01	2446.36	3383.66	-0.467949	0.0028756	0.025724	down	3530	GLDP1	Glycine cleavage system P protein [Source:UniProtKB/TrEMBL;Acc:A0A178UTF1]
AT1G74940	682.03	561.307	802.753	-0.516166	0.00303624	0.0268727	down	1395	FLZ13	FCS-Like Zinc finger 13 [Source:UniProtKB/Swiss-Prot;Acc:Q8GRN0]
AT5G20380	428.854	303.28	554.427	-0.870345	3.06e-06	5.85e-05	down	2004	PHT4;5	phosphate transporter 4;5 [Source:TAIR;Acc:AT5G20380]
AT4G32940	6075.36	4795.84	7354.89	-0.61692	0.00411224	0.0345153	down	2134	GAMMA-VPE	GAMMAVPE [Source:UniProtKB/TrEMBL;Acc:A0A178UU68]
AT1G68010	229.938	9.91771	449.958	-5.50364	3.3e-79	3.44e-76	down	1486	HPR	hydroxypyruvate reductase [Source:TAIR;Acc:AT1G68010]
AT1G71810	352.147	240.693	463.601	-0.945691	9.14e-05	0.00130527	down	2487		Uncharacterized aarF domain-containing protein kinase At1g71810, chloroplastic [Source:UniProtKB/Swiss-Prot;Acc:Q94BU1]
AT5G53490	107.952	35.47	180.434	-2.3468	2.55e-09	7.86e-08	down	980		Tetratricopeptide repeat (TPR)-like superfamily protein [Source:TAIR;Acc:AT5G53490]
AT2G30150	175.059	133.155	216.963	-0.704336	0.00125904	0.0127236	down	1547		UDP-Glycosyltransferase superfamily protein [Source:TAIR;Acc:AT2G30150]
AT5G17700	725.936	396.031	1055.84	-1.41471	3.04e-05	0.000482195	down	2349	DTX25	Protein DETOXIFICATION [Source:UniProtKB/TrEMBL;Acc:A0A178UJQ3]
AT2G40400	766.362	610.933	921.791	-0.593426	0.000504172	0.00580052	down	2469	RER5	Protein RETICULATA-RELATED 5, chloroplastic [Source:UniProtKB/Swiss-Prot;Acc:Q9SIY5]
AT5G02790	1035.42	695.929	1374.91	-0.982324	4.21e-09	1.26e-07	down	1171	GSTL3	Glutathione S-transferase L3 [Source:UniProtKB/Swiss-Prot;Acc:Q9LZ06]
AT1G50250	1095.2	194.655	1995.74	-3.35793	3.79e-44	1.09e-41	down	2573	FTSH1	ATP-dependent zinc metalloprotease FTSH 1, chloroplastic [Source:UniProtKB/Swiss-Prot;Acc:Q39102]
AT2G01420	1385.8	1086.38	1685.22	-0.633406	0.000113753	0.00157367	down	2929	PIN4	Auxin efflux carrier component [Source:UniProtKB/TrEMBL;Acc:A0A178VZS2]
AT5G28840	2153.36	1627.55	2679.16	-0.719081	8.01e-06	0.000141687	down	1721	GME	GDP-mannose 3,5-epimerase [Source:UniProtKB/Swiss-Prot;Acc:Q93VR3]
AT1G06540	40.8387	15.4617	66.2156	-2.09847	0.00138113	0.0137355	down	1933		F12K11.13 [Source:UniProtKB/TrEMBL;Acc:Q9SHJ7]
AT1G13610	69.1348	28.7653	109.504	-1.92858	1.58e-09	5.04e-08	down	1357		Alpha/beta-Hydrolases superfamily protein [Source:UniProtKB/TrEMBL;Acc:Q9FZ68]
AT3G01060	41.1205	18.8035	63.4375	-1.75434	8.92e-06	0.000156509	down	1615		Lysine-tRNA ligase [Source:UniProtKB/TrEMBL;Acc:Q8RWI4]
AT3G47560	178.552	130.524	226.579	-0.795703	0.000433503	0.00512418	down	1046		Alpha/beta-Hydrolases superfamily protein [Source:UniProtKB/TrEMBL;Acc:F4JBL2]
AT1G54290	358.55	287.697	429.402	-0.577778	0.00250969	0.0229636	down	855		Protein translation factor SUI1 homolog 2 [Source:UniProtKB/Swiss-Prot;Acc:Q94JV4]
AT1G73650	1318.92	329.543	2308.3	-2.80829	3.04e-24	3.2e-22	down	1241		Protein of unknown function (DUF1295) [Source:TAIR;Acc:AT1G73650]
AT2G30790	15.0266	1.84107	28.2121	-3.9377	7.93e-08	1.97e-06	down	1010	PSBP2	Putative oxygen-evolving enhancer protein 2-2 [Source:UniProtKB/Swiss-Prot;Acc:O49344]
AT3G57180	96.775	67.9391	125.611	-0.886647	0.00123804	0.0125724	down	2232	BPG2	P-loop containing nucleoside triphosphate hydrolases superfamily protein [Source:TAIR;Acc:AT3G57180]
AT1G78476	16.2461	2.044	30.4482	-3.89689	3.98e-08	1.04e-06	down	638		unknown protein. [Source:TAIR;Acc:AT1G78476]
AT3G09650	316.751	204.882	428.621	-1.06491	6.67e-08	1.68e-06	down	2624	HCF152	HCF152 [Source:UniProtKB/TrEMBL;Acc:A0A178V9F2]
AT1G63610	300.99	243.423	358.556	-0.558736	0.00472788	0.0388481	down	1556		At1g63610 [Source:UniProtKB/TrEMBL;Acc:Q9CAC8]
AT3G20100	917.76	511.264	1324.26	-1.37304	1.77e-15	9.93e-14	down	1982	CYP705A19	AT3g20100/MAL21_14 [Source:UniProtKB/TrEMBL;Acc:Q9LJY8]
AT5G13730	10.5221	0.303948	20.7403	-6.09247	1.35e-07	3.24e-06	down	1454	SIGD	RNA polymerase sigma factor sigD, chloroplastic [Source:UniProtKB/Swiss-Prot;Acc:Q9ZSL6]
AT5G42070	17.1339	8.45275	25.8151	-1.61072	0.00510626	0.0415207	down	705		Uncharacterized protein At5g42070 [Source:UniProtKB/TrEMBL;Acc:Q8RWR9]
AT2G02980	47.0416	27.5517	66.5316	-1.2719	0.000499304	0.00575777	down	2074	PCMP-H26	Pentatricopeptide repeat-containing protein At2g02980, chloroplastic [Source:UniProtKB/Swiss-Prot;Acc:Q8LK93]
AT2G15970	5677.23	4060.71	7293.76	-0.84493	4.13e-08	1.07e-06	down	919	COR413PM1	WCOR413-like protein [Source:UniProtKB/TrEMBL;Acc:A0A178VY40]
AT5G24690	2206.11	1859.37	2552.84	-0.457285	0.00542345	0.0437442	down	2135		AT5g24690/MXC17_8 [Source:UniProtKB/TrEMBL;Acc:Q93W02]
AT3G51420	18.5268	0.663074	36.3905	-5.77825	3.62e-12	1.52e-10	down	2064	SSL4	SSL4 [Source:UniProtKB/TrEMBL;Acc:A0A178VDG6]
AT4G13010	1240.89	760.741	1721.04	-1.17781	2.28e-12	9.88e-11	down	1349	CEQORH	Chloroplast envelope quinone oxidoreductase homolog [Source:UniProtKB/Swiss-Prot;Acc:Q9SV68]
AT5G08720	213.952	161.659	266.246	-0.719806	0.000976126	0.0103016	down	2483		At5g08720 [Source:UniProtKB/TrEMBL;Acc:Q9C5A5]
AT5G53890	944.578	675.446	1213.71	-0.84551	9.91e-07	2.07e-05	down	3792	PSKR2	Leucine-rich repeat receptor-like protein kinase (Fragment) [Source:UniProtKB/TrEMBL;Acc:C0LGV8]
AT1G10522	125.778	95.2688	156.288	-0.714127	0.00463982	0.038225	down	1047	PRIN2	Protein PLASTID REDOX INSENSITIVE 2, chloroplastic [Source:UniProtKB/Swiss-Prot;Acc:Q9XIK0]
AT4G02020	1424.56	1192.61	1656.51	-0.474022	0.00452319	0.0373749	down	3128	EZA1	Histone-lysine N-methyltransferase EZA1 [Source:UniProtKB/Swiss-Prot;Acc:Q9ZSM8]
AT3G26710	167.07	79.6704	254.469	-1.67537	0.000170786	0.00226955	down	1277	CCB1	Protein COFACTOR ASSEMBLY OF COMPLEX C SUBUNIT B CCB1, chloroplastic [Source:UniProtKB/Swiss-Prot;Acc:Q9LSE4]
AT4G16770	391.075	308.047	474.103	-0.622051	0.000923811	0.00985766	down	1717		2-oxoglutarate (2OG) and Fe(II)-dependent oxygenase superfamily protein [Source:TAIR;Acc:AT4G16770]
AT1G22630	11.7374	0.331537	23.1433	-6.12528	1.7e-08	4.71e-07	down	734		At1g22630/F12K8_2 [Source:UniProtKB/TrEMBL;Acc:Q9SKA5]
AT3G23530	2417.91	615.375	4220.44	-2.77786	1.29e-19	9.91e-18	down	3413		AT3g23510/MEE5_5 [Source:UniProtKB/TrEMBL;Acc:Q8VZH1]
AT1G48870	109.112	53.7844	164.439	-1.61229	8.5e-05	0.00122455	down	2300		Transducin/WD40 repeat-like superfamily protein [Source:UniProtKB/TrEMBL;Acc:Q9FVP7]
AT5G60920	6946.5	5752.05	8140.96	-0.501121	0.00120485	0.0123065	down	2099	COB	Protein COBRA [Source:UniProtKB/Swiss-Prot;Acc:Q94KT8]
AT2G16890	675.721	130.254	1221.19	-3.22888	3.32e-06	6.31e-05	down	1896	UGT90A1	UDP-glycosyltransferase 90A1 [Source:UniProtKB/Swiss-Prot;Acc:Q9ZVX4]
AT1G15100	1815.67	1469.63	2161.71	-0.556726	0.000909168	0.00972215	down	931	RHA2A	E3 ubiquitin-protein ligase RHA2A [Source:UniProtKB/Swiss-Prot;Acc:Q9ZT50]
AT3G49760	354.272	240.282	468.262	-0.962585	1.02e-06	2.12e-05	down	895	AtbZIP5	At3g49760 [Source:UniProtKB/TrEMBL;Acc:Q29PT3]
AT2G32390	394.475	283.483	505.468	-0.834359	7.07e-06	0.000126756	down	3040	GLR3.5	Glutamate receptor 3.5 [Source:UniProtKB/Swiss-Prot;Acc:Q9SW97]
AT2G32640	113.677	23.9791	203.376	-3.0843	3.24e-26	3.97e-24	down	2255		Lycopene beta/epsilon cyclase protein [Source:UniProtKB/TrEMBL;Acc:Q0WVA1]
AT1G78570	8222	4341.05	12102.9	-1.47924	9.36e-07	1.97e-05	down	2572	RHM1	Trifunctional UDP-glucose 4,6-dehydratase/UDP-4-keto-6-deoxy-D-glucose 3,5-epimerase/UDP-4-keto-L-rhamnose-reductase RHM1 [Source:UniProtKB/Swiss-Prot;Acc:Q9SYM5]
AT1G22430	552.837	208.702	896.973	-2.10362	1.36e-08	3.81e-07	down	1639		Alcohol dehydrogenase-like 1 [Source:UniProtKB/Swiss-Prot;Acc:Q9SK86]
AT2G41530	2364.57	1935.79	2793.35	-0.529077	0.000831539	0.00896515	down	1446	SFGH	S-formylglutathione hydrolase [Source:UniProtKB/Swiss-Prot;Acc:Q8LAS8]
AT2G40480	1420.26	1136.63	1703.88	-0.584067	0.000441272	0.00520127	down	1987		WEB family protein At2g40480 [Source:UniProtKB/Swiss-Prot;Acc:Q5XVC7]
AT5G17780	78.2271	25.0348	131.419	-2.39217	1.32e-14	6.9e-13	down	1541		alpha/beta-Hydrolases superfamily protein [Source:TAIR;Acc:AT5G17780]
AT1G56500	251.373	135.304	367.442	-1.44131	5.94e-12	2.44e-10	down	3496	SOQ1	Protein SUPPRESSOR OF QUENCHING 1, chloroplastic [Source:UniProtKB/Swiss-Prot;Acc:Q8VZ10]
AT3G08940	213.993	50.5191	377.467	-2.90145	0.000105847	0.00148483	down	1238	LHCB4.2	Chlorophyll a-b binding protein CP29.2, chloroplastic [Source:UniProtKB/Swiss-Prot;Acc:Q9XF88]
AT2G38870	606.899	487.407	726.392	-0.575622	0.00296872	0.0263685	down	732		Putative protease inhibitor [Source:UniProtKB/TrEMBL;Acc:Q9ZV18]
AT5G47900	8.94025	1.76764	16.1129	-3.18832	0.000347146	0.00424379	down	1589		Protein of unknown function (DUF1624) [Source:TAIR;Acc:AT5G47900]
AT5G55220	300.655	180.739	420.571	-1.21844	1.43e-09	4.58e-08	down	2042	TIG	Trigger factor-like protein TIG, Chloroplastic [Source:UniProtKB/Swiss-Prot;Acc:Q8S9L5]
AT1G20810	154.582	100.473	208.692	-1.05457	1.16e-05	0.000200637	down	1048	FKBP18	Peptidyl-prolyl cis-trans isomerase FKBP18, chloroplastic [Source:UniProtKB/Swiss-Prot;Acc:Q9LM71]
AT3G11050	88.828	43.9677	133.688	-1.60436	1.52e-08	4.23e-07	down	1148	FER2	Ferritin-2, chloroplastic [Source:UniProtKB/Swiss-Prot;Acc:Q9SRL5]
AT3G51870	133.442	88.8549	178.029	-1.00259	8.9e-05	0.00127584	down	1547	EAAC	Probable envelope ADP,ATP carrier protein, chloroplastic [Source:UniProtKB/Swiss-Prot;Acc:O65023]
AT3G06510	1342.82	974.954	1710.68	-0.811165	1.11e-06	2.29e-05	down	2496	SFR2	Glycosyl hydrolase superfamily protein [Source:TAIR;Acc:AT3G06510]
AT3G17040	343.249	23.2047	663.293	-4.83716	1.66e-85	2.07e-82	down	2373	HCF107	Protein high chlorophyll fluorescent 107 [Source:UniProtKB/Swiss-Prot;Acc:Q8RWG2]
AT3G61220	1021.71	100.62	1942.81	-4.27115	1.01e-20	8.43e-19	down	1133		NAD(P)-binding Rossmann-fold superfamily protein [Source:UniProtKB/TrEMBL;Acc:A0A1I9LNT2]
AT3G12490	2950.31	2461.29	3439.34	-0.482719	0.00332238	0.0290455	down	701	CYS6	Cysteine proteinase inhibitor 6 [Source:UniProtKB/Swiss-Prot;Acc:Q8H0X6]
AT2G24120	792.229	622.916	961.541	-0.62631	0.00029398	0.00366187	down	3647	RPOT3	DNA-directed RNA polymerase 3, chloroplastic [Source:UniProtKB/Swiss-Prot;Acc:O24600]
AT5G66720	1128.27	923.175	1333.37	-0.530401	0.00156557	0.0153321	down	1641		Probable protein phosphatase 2C 80 [Source:UniProtKB/Swiss-Prot;Acc:Q9LVQ8]
AT3G62750	59.6957	29.9467	89.4447	-1.5786	0.00125104	0.0126633	down	1797	BGLU8	Beta glucosidase 8 [Source:UniProtKB/TrEMBL;Acc:A0A1I9LTV6]
AT1G54740	788.05	290.906	1285.19	-2.14336	0.000925336	0.00986972	down	1218		Protein of unknown function (DUF3049) [Source:TAIR;Acc:AT1G54740]
AT5G51040	2954.42	1762.49	4146.34	-1.23422	8.82e-15	4.68e-13	down	1014		Succinate dehydrogenase assembly factor [Source:UniProtKB/TrEMBL;Acc:F4KBT8]
AT3G30460	4.46854	0	8.93708	#NAME?	0.000733064	0.00804184	down	754		RING/U-box superfamily protein [Source:UniProtKB/TrEMBL;Acc:A0A1I9LPW5]
AT4G04350	366.499	261.748	471.25	-0.848313	9.55e-06	0.000166836	down	3081	EMB2369	Leucine--tRNA ligase, chloroplastic/mitochondrial [Source:UniProtKB/Swiss-Prot;Acc:Q9XEA0]
AT1G35420	101.987	3.2326	200.742	-5.9565	4.16e-50	1.53e-47	down	1270		Alpha/beta-Hydrolases superfamily protein [Source:UniProtKB/TrEMBL;Acc:F4HYC8]
AT2G32560	747.175	587.284	907.066	-0.627149	0.000427605	0.00506404	down	1924		F-box protein At2g32560 [Source:UniProtKB/Swiss-Prot;Acc:Q8RY82]
AT1G63880	72.5811	27.0248	118.137	-2.12811	1.01e-11	4.09e-10	down	3413	RLM1B	Disease resistance protein RML1B [Source:UniProtKB/Swiss-Prot;Acc:Q9CAK1]
AT4G02510	3925.64	3295.97	4555.31	-0.466845	0.0032607	0.0285663	down	5694	TOC159	Translocase of chloroplast 159, chloroplastic [Source:UniProtKB/Swiss-Prot;Acc:O81283]
AT4G10180	827.387	693.83	960.944	-0.469871	0.00493833	0.0403125	down	1932	DET1	Light-mediated development protein DET1 [Source:UniProtKB/Swiss-Prot;Acc:P48732]
AT3G62190	799.915	408.607	1191.22	-1.54366	1.68e-18	1.19e-16	down	823		AT3g62190/T17J13_150 [Source:UniProtKB/TrEMBL;Acc:Q9M1Q5]
AT1G08550	201.07	121.432	280.708	-1.20892	3.5e-06	6.63e-05	down	2212	VDE1	NPQ1 [Source:UniProtKB/TrEMBL;Acc:A0A384K8V4]
AT4G38970	408.425	10.3783	806.472	-6.27999	2.84e-28	3.84e-26	down	1632	FBA2	Fructose-bisphosphate aldolase [Source:UniProtKB/TrEMBL;Acc:A0A178UW98]
AT1G14687	49.4079	31.098	67.7178	-1.12271	0.00206708	0.0194661	down	972	ZHD14	ZHD14 [Source:UniProtKB/TrEMBL;Acc:A0A178W745]
AT4G04750	511.546	80.7973	942.296	-3.5438	4.15e-19	3.11e-17	down	1829		Major facilitator superfamily protein [Source:TAIR;Acc:AT4G04750]
AT5G19875	407.519	325.924	489.113	-0.585631	0.00576837	0.0460947	down	1098		At5g19875 [Source:UniProtKB/TrEMBL;Acc:Q8L9M7]
AT3G26080	175.14	76.208	274.073	-1.84654	2.55e-12	1.1e-10	down	1150		Plastid-lipid associated protein PAP / fibrillin family protein [Source:UniProtKB/TrEMBL;Acc:A0A1I9LP70]
AT3G14415	751.413	418.795	1084.03	-1.37209	1.02e-09	3.32e-08	down	1654		GOX2 [Source:UniProtKB/TrEMBL;Acc:A0A384L6X3]
AT2G30520	2092.34	838.791	3345.88	-1.996	1.57e-25	1.86e-23	down	2169	RPT2	Root phototropism protein 2 [Source:UniProtKB/Swiss-Prot;Acc:Q682S0]
AT3G44020	14.7856	5.18363	24.3876	-2.23411	0.000422942	0.00502547	down	784		Thylakoid lumenal P17.1 protein [Source:UniProtKB/TrEMBL;Acc:Q9LXV9]
AT5G17460	1365.64	819.674	1911.6	-1.22166	1.73e-13	8.29e-12	down	1952		Glutamyl-tRNA (Gln) amidotransferase subunit C [Source:UniProtKB/TrEMBL;Acc:Q949X1]
AT3G19184	57.2131	38.4249	76.0013	-0.983981	0.0055163	0.0443788	down	1194		AP2/B3-like transcriptional factor family protein [Source:UniProtKB/TrEMBL;Acc:A0A1I9LPB7]
AT1G02475	150.103	94.3395	205.867	-1.12578	2.57e-06	4.99e-05	down	1091		Polyketide cyclase/dehydrase and lipid transport superfamily protein [Source:UniProtKB/TrEMBL;Acc:Q94K52]
AT4G29080	1687.25	1354.67	2019.84	-0.576293	0.000415064	0.00494361	down	1435	IAA27	Auxin-responsive protein IAA27 [Source:UniProtKB/Swiss-Prot;Acc:Q9ZSY8]
AT3G57640	24.8282	12.2011	37.4553	-1.61815	0.000963166	0.0101993	down	1528		At3g57640 [Source:UniProtKB/TrEMBL;Acc:Q9SVX8]
AT5G16400	105.863	43.9698	167.756	-1.93178	1.75e-05	0.00029186	down	1185	TRXF2	TRXF2 [Source:UniProtKB/TrEMBL;Acc:A0A178UDV9]
AT1G45474	175.69	10.3112	341.07	-5.04778	3.33e-15	1.83e-13	down	950	LHCA5	Photosystem I chlorophyll a/b-binding protein 5, chloroplastic [Source:UniProtKB/Swiss-Prot;Acc:Q9C639]
AT4G28025	440.126	328.648	551.604	-0.747091	7.55e-05	0.00110311	down	856		Uncharacterized protein At4g28025 [Source:UniProtKB/TrEMBL;Acc:Q9C5F3]
AT5G50100	312.893	39.6882	586.099	-3.88436	3.22e-17	2.06e-15	down	1032		Uncharacterized protein At5g50100, chloroplastic [Source:UniProtKB/Swiss-Prot;Acc:Q8W485]
AT1G33810	408.018	314.862	501.174	-0.670592	0.000396074	0.00474454	down	824		Zinc finger/BTB domain protein [Source:UniProtKB/TrEMBL;Acc:Q8L9M8]
AT4G09040	375.164	234.974	515.354	-1.13306	0.000538166	0.00613799	down	1436		At4g09040 [Source:UniProtKB/TrEMBL;Acc:Q6NPL0]
AT1G66970	80.7859	46.2251	115.347	-1.31923	1.22e-05	0.000208658	down	2899	SVL2	SHV3-like 2 [Source:UniProtKB/TrEMBL;Acc:F4HQ30]
AT1G50020	356.379	196.852	515.906	-1.39	1.09e-12	4.89e-11	down	1009		F2J10.10 protein [Source:UniProtKB/TrEMBL;Acc:Q9LPM3]
AT1G01320	1020.68	621.197	1420.16	-1.19293	3e-12	1.28e-10	down	6038		Tetratricopeptide repeat (TPR)-like superfamily protein [Source:UniProtKB/TrEMBL;Acc:F4HS99]
AT1G14270	142.561	43.5844	241.538	-2.47037	1.88e-21	1.65e-19	down	1436		CAAX amino terminal protease family protein [Source:UniProtKB/TrEMBL;Acc:F4HUI0]
AT2G21385	345.657	278.787	412.527	-0.565323	0.00362414	0.0311823	down	1283		Expressed protein [Source:UniProtKB/TrEMBL;Acc:Q94AU3]
AT5G24000	252.215	202.25	302.181	-0.579278	0.00568943	0.0455373	down	1610		Keratin-associated protein (DUF819) [Source:UniProtKB/TrEMBL;Acc:Q9FLW1]
AT5G17000	1230.94	768.647	1693.23	-1.13939	0.00189294	0.0180377	down	1676		AT5g16970/F2K13_120 [Source:UniProtKB/TrEMBL;Acc:Q93Z72]
AT2G34810	391.73	48.2395	735.219	-3.92989	1.81e-40	4.27e-38	down	2047		Berberine bridge enzyme-like 16 [Source:UniProtKB/Swiss-Prot;Acc:O64745]
AT3G14595	1160.56	826.581	1494.54	-0.854475	2.21e-05	0.000361053	down	1000		At3g14595 [Source:UniProtKB/TrEMBL;Acc:Q1H563]
AT3G01480	367.306	123.591	611.02	-2.30564	1.2e-10	4.32e-09	down	1771	CYP38	Peptidyl-prolyl cis-trans isomerase CYP38, chloroplastic [Source:UniProtKB/Swiss-Prot;Acc:Q9SSA5]
AT1G78060	2169.61	1492.37	2846.84	-0.931755	1.17e-08	3.29e-07	down	2499	BXL7	Probable beta-D-xylosidase 7 [Source:UniProtKB/Swiss-Prot;Acc:Q9SGZ5]
AT5G58800	934.76	693.142	1176.38	-0.763129	7.91e-06	0.000140198	down	900		Probable NAD(P)H dehydrogenase (quinone) FQR1-like 3 [Source:UniProtKB/Swiss-Prot;Acc:Q9LUX9]
AT2G33860	680.088	547.88	812.295	-0.568144	0.00162579	0.0158597	down	2308	ARF3	Auxin response factor 3 [Source:UniProtKB/Swiss-Prot;Acc:O23661]
AT4G32770	193.023	56.9966	329.049	-2.52935	1.18e-26	1.49e-24	down	1958	VTE1	Tocopherol cyclase, chloroplastic [Source:UniProtKB/Swiss-Prot;Acc:Q94FY7]
AT3G05625	27.5169	14.0528	40.9811	-1.5441	0.00231336	0.0214382	down	1262		At3g05625 [Source:UniProtKB/TrEMBL;Acc:Q8GUK5]
AT1G06430	1037.59	318.046	1757.12	-2.46591	5.41e-16	3.15e-14	down	2468	FTSH8	ATP-dependent zinc metalloprotease FTSH 8, chloroplastic [Source:UniProtKB/Swiss-Prot;Acc:Q8W585]
AT4G31870	4.73051	0	9.46102	#NAME?	0.000280421	0.00352104	down	1705	GPX7	Putative glutathione peroxidase 7, chloroplastic [Source:UniProtKB/Swiss-Prot;Acc:Q9SZ54]
AT5G22340	333.181	239.219	427.143	-0.836386	2.25e-05	0.000367875	down	1564		unknown protein; FUNCTIONS IN: molecular_function unknown; INVOLVED IN: biological_process unknown; LOCATED IN: chloroplast; EXPRESSED IN: 22 plant structures; EXPRESSED DURING: 13 growth stages; Ha. [Source:TAIR;Acc:AT5G22340]
AT4G04840	656.473	11.5555	1301.39	-6.81534	1.16e-10	4.2e-09	down	1036	MSRB6	MSRB6 [Source:UniProtKB/TrEMBL;Acc:A0A178V4R5]
AT1G24530	575.371	428.17	722.571	-0.754958	0.000889862	0.00953608	down	2076		F21J9.19 [Source:UniProtKB/TrEMBL;Acc:Q9FYL1]
AT5G66055	908.033	725.639	1090.43	-0.58757	0.000868623	0.00932447	down	1745	AKRP	AT5G66055 protein [Source:UniProtKB/TrEMBL;Acc:B9DF91]
AT1G28170	14.9692	6.8787	23.0597	-1.74516	0.00561354	0.0450596	down	1167	SOT7	Cytosolic sulfotransferase 7 [Source:UniProtKB/Swiss-Prot;Acc:Q9FZ91]
AT2G20340	572.415	287.373	857.457	-1.57714	4.98e-11	1.87e-09	down	1826	ELI5	Tyrosine decarboxylase 1 [Source:UniProtKB/Swiss-Prot;Acc:Q8RY79]
AT4G10340	577.84	33.5274	1122.15	-5.06479	2.8e-107	8.76e-104	down	1389	LHCB5	Chlorophyll a-b binding protein, chloroplastic [Source:UniProtKB/TrEMBL;Acc:A0A178UW55]
AT3G59120	113.443	82.7972	144.089	-0.799309	0.00157527	0.015421	down	1833		Cysteine/Histidine-rich C1 domain family protein [Source:UniProtKB/TrEMBL;Acc:Q9LYS4]
AT1G20020	139.498	12.7899	266.207	-4.37947	1.09e-19	8.4e-18	down	1569	LFNR2	Ferredoxin--NADP reductase, leaf isozyme 2, chloroplastic [Source:UniProtKB/Swiss-Prot;Acc:Q8W493]
AT1G80640	472.59	363.129	582.051	-0.680666	0.000205782	0.00266823	down	1839		Probable receptor-like protein kinase At1g80640 [Source:UniProtKB/Swiss-Prot;Acc:Q0V7T5]
AT1G44446	102.741	57.9943	147.488	-1.34661	7.09e-07	1.52e-05	down	2024	CAO	CH1 [Source:UniProtKB/TrEMBL;Acc:A0A178W6L1]
AT4G27560	1019.82	320.293	1719.34	-2.42439	1.52e-09	4.85e-08	down	1804	UGT79B2	UDP-glycosyltransferase 79B2 [Source:UniProtKB/Swiss-Prot;Acc:Q9T080]
AT3G54890	331.114	27.7172	634.511	-4.51679	1.58e-77	1.46e-74	down	1107	LHCA1	Chlorophyll a-b binding protein, chloroplastic [Source:UniProtKB/TrEMBL;Acc:A0A178VBT7]
AT1G07320	698.891	411.294	986.488	-1.26213	1.03e-11	4.15e-10	down	1229	RPL4	RPL4 [Source:UniProtKB/TrEMBL;Acc:A0A384KN11]
AT3G10200	114.734	37.4219	192.047	-2.35951	8.09e-18	5.42e-16	down	2430		S-adenosyl-L-methionine-dependent methyltransferases superfamily protein [Source:UniProtKB/TrEMBL;Acc:A0A1I9LQ25]
AT4G25050	152.102	15.1298	289.074	-4.25597	4.41e-16	2.6e-14	down	1019	ACP4	Acyl carrier protein 4 [Source:UniProtKB/TrEMBL;Acc:F4JRT7]
AT5G65320	137.309	60.4928	214.126	-1.82362	1.54e-13	7.37e-12	down	1050	BHLH99	Transcription factor bHLH99 [Source:UniProtKB/Swiss-Prot;Acc:Q9FKQ6]
AT4G12470	898.774	243.816	1553.73	-2.67187	4.54e-06	8.41e-05	down	865	AZI1	pEARLI1-like lipid transfer protein 1 [Source:UniProtKB/Swiss-Prot;Acc:Q9SU35]
AT1G74520	622.669	501.656	743.682	-0.567989	0.00124396	0.0126172	down	913	HVA22A	HVA22-like protein a [Source:UniProtKB/Swiss-Prot;Acc:Q9S7V4]
AT2G26800	1305.31	1004.12	1606.5	-0.677986	4.59e-05	0.000700919	down	1729	HMGCL	Hydroxymethylglutaryl-CoA lyase, mitochondrial [Source:UniProtKB/Swiss-Prot;Acc:O81027]
AT1G73170	660.778	495.915	825.641	-0.735422	2.59e-05	0.00041727	down	2205		P-loop containing nucleoside triphosphate hydrolases superfamily protein [Source:TAIR;Acc:AT1G73170]
AT5G23920	844.597	647.584	1041.61	-0.685677	5.91e-05	0.000881891	down	999		At5g23920 [Source:UniProtKB/TrEMBL;Acc:Q9FF88]
AT4G26860	450.152	363.002	537.301	-0.565755	0.00234987	0.0217443	down	1106		Pyridoxal phosphate homeostasis protein [Source:UniProtKB/TrEMBL;Acc:F4JVS4]
AT1G71720	238.141	155.769	320.514	-1.04098	2.3e-05	0.000374111	down	1711		F14O23.10 protein [Source:UniProtKB/TrEMBL;Acc:Q9M9H4]
AT1G65230	13.129	5.77327	20.4847	-1.82708	0.00628412	0.0496614	down	1103		Transmembrane protein, putative (DUF2358) [Source:UniProtKB/TrEMBL;Acc:Q8L604]
AT1G70890	1001.27	570.637	1431.9	-1.32729	4.63e-05	0.000706635	down	1031	MLP43	MLP-like protein 43 [Source:UniProtKB/Swiss-Prot;Acc:Q9SSK5]
AT4G18370	121.783	55.0678	188.499	-1.77528	1.9e-11	7.4e-10	down	1139	DEGP5	Protease Do-like 5, chloroplastic [Source:UniProtKB/Swiss-Prot;Acc:Q9SEL7]
AT4G01680	183.988	84.6773	283.299	-1.74228	2.72e-14	1.37e-12	down	1328	MYB55	Myb domain protein 55 [Source:UniProtKB/TrEMBL;Acc:Q9ZSI4]
AT4G00370	729.787	269.153	1190.42	-2.14497	3.95e-19	2.97e-17	down	2128	PHT4;4	Ascorbate transporter, chloroplastic [Source:UniProtKB/Swiss-Prot;Acc:Q8GX78]
AT1G22700	250.633	165.106	336.159	-1.02575	1.3e-06	2.64e-05	down	1207	PYG7	Tetratricopeptide repeat domain-containing protein PYG7, chloroplastic [Source:UniProtKB/Swiss-Prot;Acc:B9DHG0]
AT2G47850	1155.06	936.333	1373.79	-0.55307	0.000915836	0.00978509	down	2359		Zinc finger CCCH domain-containing protein 32 [Source:UniProtKB/Swiss-Prot;Acc:Q84W91]
AT3G06410	1155.43	922.684	1388.18	-0.589285	0.000348216	0.0042548	down	2236		Zinc finger CCCH domain-containing protein 34 [Source:UniProtKB/Swiss-Prot;Acc:Q9SQU4]
AT2G47890	4499.17	2738.42	6259.93	-1.1928	1.37e-05	0.000232587	down	1740	COL13	Zinc finger protein CONSTANS-LIKE 13 [Source:UniProtKB/Swiss-Prot;Acc:O82256]
AT5G66190	378.096	53.8671	702.325	-3.70466	1.59e-63	9.67e-61	down	1506	LFNR1	Ferredoxin--NADP reductase, leaf isozyme 1, chloroplastic [Source:UniProtKB/Swiss-Prot;Acc:Q9FKW6]
AT5G05740	159.265	64.4947	254.036	-1.97778	4.48e-16	2.63e-14	down	1990	EGY2	Probable zinc metalloprotease EGY2, chloroplastic [Source:UniProtKB/Swiss-Prot;Acc:Q9FFK3]
AT3G02885	1059.86	700.712	1419.01	-1.01799	1.3e-09	4.18e-08	down	835	GASA5	Gibberellin-regulated protein 5 [Source:UniProtKB/Swiss-Prot;Acc:Q84J95]
AT5G66570	1083.85	98.1439	2069.55	-4.39827	1.85e-108	6.62e-105	down	1508	PSBO1	Oxygen-evolving enhancer protein 1-1, chloroplastic [Source:UniProtKB/Swiss-Prot;Acc:P23321]
AT3G56890	26.0944	1.41784	50.771	-5.16223	2.18e-13	1.02e-11	down	850		F-box associated ubiquitination effector family protein [Source:UniProtKB/TrEMBL;Acc:Q9LER9]
AT5G20140	106.338	70.6789	141.997	-1.00651	9.7e-05	0.00137673	down	1389		SOUL heme-binding family protein [Source:UniProtKB/TrEMBL;Acc:F4K452]
AT5G51720	4.67204	0	9.34408	#NAME?	0.000294502	0.00366516	down	743	NEET	NEET [Source:UniProtKB/TrEMBL;Acc:A0A178UGQ5]
AT2G32480	212.694	159.811	265.576	-0.732755	0.000495213	0.0057185	down	1503	ARASP	Membrane metalloprotease ARASP, chloroplastic [Source:UniProtKB/Swiss-Prot;Acc:O80885]
AT2G30390	287.134	180.456	393.812	-1.12586	3.34e-08	8.82e-07	down	1934	FC2	Ferrochelatase [Source:UniProtKB/TrEMBL;Acc:F4IMT3]
AT5G52960	161.888	116.908	206.868	-0.823336	0.00217099	0.0202842	down	912		At5g52960 [Source:UniProtKB/TrEMBL;Acc:Q9LVV6]
AT5G26270	283.536	93.2868	473.784	-2.34449	2.67e-05	0.000427233	down	1094		unknown protein; Ha. [Source:TAIR;Acc:AT5G26270]
AT2G36490	937.174	736.023	1138.32	-0.62909	0.00146448	0.0144439	down	4827	ROS1	Protein ROS1 [Source:UniProtKB/Swiss-Prot;Acc:Q9SJQ6]
AT1G77060	87.1244	50.9602	123.289	-1.2746	0.000486539	0.00563394	down	1312		Carboxyvinyl-carboxyphosphonate phosphorylmutase, chloroplastic [Source:UniProtKB/Swiss-Prot;Acc:O49290]
AT3G02690	181.055	119.348	242.763	-1.02438	4.77e-05	0.000725819	down	1458		WAT1-related protein At3g02690, chloroplastic [Source:UniProtKB/Swiss-Prot;Acc:Q93V85]
AT5G52030	329.766	256.004	403.528	-0.656503	0.000499109	0.00575777	down	1574		TraB family protein [Source:UniProtKB/TrEMBL;Acc:Q9FJ89]
AT5G40060	96.6133	62.2918	130.935	-1.07173	7.18e-05	0.00105462	down	3868		Disease resistance protein (NBS-LRR class) family [Source:UniProtKB/TrEMBL;Acc:F4KFY1]
AT2G44650	502.318	409.607	595.03	-0.538723	0.00301354	0.0267191	down	1171	CPN10-2	10 kDa chaperonin 2, chloroplastic [Source:UniProtKB/Swiss-Prot;Acc:O80504]
AT5G14910	245.856	130.057	361.654	-1.47547	4.95e-10	1.69e-08	down	1099		AT5g14910/F2G14_30 [Source:UniProtKB/TrEMBL;Acc:Q93VK7]
AT1G64355	121.583	55.8777	187.288	-1.74492	5.53e-10	1.88e-08	down	1063		1-acyl-sn-glycerol-3-phosphate acyltransferase [Source:UniProtKB/TrEMBL;Acc:Q8S9I8]
AT2G27820	1278.03	888.015	1668.05	-0.909508	7.24e-06	0.000129425	down	1718	ADT3	Arogenate dehydratase 3, chloroplastic [Source:UniProtKB/Swiss-Prot;Acc:Q9ZUY3]
AT5G18200	612.592	494.283	730.901	-0.564338	0.00139362	0.0138268	down	1535		ADP-glucose phosphorylase [Source:UniProtKB/Swiss-Prot;Acc:Q9FK51]
AT3G16470	12332.7	9199.11	15466.3	-0.749561	1.94e-06	3.84e-05	down	1726	JAL35	Jacalin-related lectin 35 [Source:UniProtKB/Swiss-Prot;Acc:O04309]
AT3G49140	916.301	627.09	1205.51	-0.942902	9.85e-07	2.06e-05	down	2010		Uncharacterized protein At3g49140 [Source:UniProtKB/Swiss-Prot;Acc:Q0WMN5]
AT4G13190	131.244	91.2296	171.259	-0.90861	0.000306754	0.00379628	down	2037	PBL24	Probable serine/threonine-protein kinase PBL24 [Source:UniProtKB/Swiss-Prot;Acc:Q1PE89]
AT4G13195	156.485	119.08	193.891	-0.70332	0.00277654	0.0250349	down	1470	CLE44	CLAVATA3/ESR (CLE)-related protein 44 [Source:UniProtKB/Swiss-Prot;Acc:Q941C5]
AT3G48730	430.297	313.482	547.111	-0.803452	1.63e-05	0.000272796	down	1773	GSA2	Glutamate-1-semialdehyde 2,1-aminomutase 2, chloroplastic [Source:UniProtKB/Swiss-Prot;Acc:Q42522]
AT5G67385	101.505	65.5436	137.467	-1.06856	0.000956272	0.0101392	down	2631	SR1IP1	BTB/POZ domain-containing protein SR1IP1 [Source:UniProtKB/Swiss-Prot;Acc:Q66GP0]
AT2G40150	609.27	437.732	780.807	-0.83492	3.24e-06	6.17e-05	down	1464	TBL28	Protein trichome birefringence-like 28 [Source:UniProtKB/Swiss-Prot;Acc:Q94K00]
AT4G08150	478.62	193.823	763.417	-1.97773	7.33e-06	0.000130813	down	2016	KNAT1	Homeobox protein knotted-1-like 1 [Source:UniProtKB/Swiss-Prot;Acc:P46639]
AT3G09540	482.524	389.978	575.071	-0.560347	0.00203905	0.0192455	down	1662		Pectate lyase [Source:UniProtKB/TrEMBL;Acc:Q9SF49]
AT1G49010	15.9473	4.5023	27.3924	-2.60504	4.05e-05	0.000626388	down	1353		At1g49010 [Source:UniProtKB/TrEMBL;Acc:Q9M9A3]
AT5G64120	4346.47	1411.45	7281.49	-2.36705	0.00138247	0.013738	down	1342	PER71	Peroxidase [Source:UniProtKB/TrEMBL;Acc:A0A178UAR8]
AT5G48590	223.239	166.755	279.722	-0.746264	0.000510917	0.00585868	down	1452		Gb [Source:UniProtKB/TrEMBL;Acc:Q9FJL1]
AT5G47650	336.995	228.351	445.64	-0.964627	7.07e-07	1.52e-05	down	1107	ATNUDT2	nudix hydrolase homolog 2 [Source:TAIR;Acc:AT5G47650]
AT5G15960	321.475	26.8504	616.1	-4.52015	6.25e-11	2.31e-09	down	829	KIN1	Stress-induced protein KIN1 [Source:UniProtKB/Swiss-Prot;Acc:P18612]
AT2G47400	971.015	213.941	1728.09	-3.01389	3.95e-07	8.89e-06	down	913	CP12-1	Calvin cycle protein CP12-1, chloroplastic [Source:UniProtKB/Swiss-Prot;Acc:O22914]
AT2G18560	668.417	494.502	842.332	-0.768414	0.000120309	0.00165522	down	1968		UDP-Glycosyltransferase superfamily protein [Source:UniProtKB/TrEMBL;Acc:F4IQK7]
AT1G49970	1336.86	1125.58	1548.15	-0.459876	0.00506	0.0411981	down	1722	CLPR1	ATP-dependent Clp protease proteolytic subunit-related protein 1, chloroplastic [Source:UniProtKB/Swiss-Prot;Acc:Q9XJ35]
AT1G49975	27.2611	0	54.5222	#NAME?	1.42e-20	1.17e-18	down	1231		At1g49975 [Source:UniProtKB/TrEMBL;Acc:Q8LFL5]
AT5G44530	872.697	705.121	1040.27	-0.56102	0.000920892	0.00983491	down	2672		Subtilase family protein [Source:TAIR;Acc:AT5G44530]
AT1G67700	358.483	151.725	565.242	-1.89741	6.97e-12	2.85e-10	down	1079	HHL1	Protein HHL1, chloroplastic [Source:UniProtKB/Swiss-Prot;Acc:Q8LDL0]
AT1G76160	3377.84	2570.31	4185.36	-0.703411	1.07e-05	0.000185671	down	2290	sks5	Sks5 [Source:UniProtKB/TrEMBL;Acc:A0A178WJJ9]
AT4G17600	77.4479	10.2858	144.61	-3.81345	6.73e-27	8.59e-25	down	1620	LIL3.1	Light-harvesting complex-like protein 3 isotype 1, chloroplastic [Source:UniProtKB/Swiss-Prot;Acc:Q9SYX1]
AT1G20225	1783.62	1302.98	2264.26	-0.797222	8.02e-07	1.7e-05	down	974		Thioredoxin superfamily protein [Source:UniProtKB/TrEMBL;Acc:Q8W456]
AT5G16550	1039.27	838.643	1239.9	-0.564092	0.000810991	0.00878118	down	1176		Voltage-dependent L-type calcium channel subunit [Source:UniProtKB/TrEMBL;Acc:Q9FFC9]
AT4G34060	55.468	37.1828	73.7533	-0.988071	0.00302695	0.026819	down	3445	DML3	demeter-like protein 3 [Source:TAIR;Acc:AT4G34060]
AT1G31330	423.928	33.2056	814.651	-4.61668	5.78e-77	5.16e-74	down	1203	PSAF	Photosystem I reaction center subunit III, chloroplastic [Source:UniProtKB/Swiss-Prot;Acc:Q9SHE8]
AT1G13640	1848.85	1388.73	2308.98	-0.733494	0.000829973	0.00896342	down	2527	PI4KG6	Phosphatidylinositol 4-kinase gamma 6 [Source:UniProtKB/Swiss-Prot;Acc:Q8W4R8]
AT3G06980	470.152	337.135	603.169	-0.839234	6.34e-06	0.000114477	down	2954	RH50	DEAD-box ATP-dependent RNA helicase 50 [Source:UniProtKB/Swiss-Prot;Acc:Q8GUG7]
AT5G58250	309.462	142.462	476.461	-1.74178	2.04e-17	1.32e-15	down	1126		YCF54 [Source:UniProtKB/TrEMBL;Acc:Q9LVM3]
AT5G11330	521.09	368.171	674.009	-0.872393	1.68e-06	3.35e-05	down	1532		At5g11330 [Source:UniProtKB/TrEMBL;Acc:Q9LFM4]
AT5G05260	7.58255	0	15.1651	#NAME?	1.66e-06	3.31e-05	down	1720	CYP79A2	Phenylalanine N-monooxygenase [Source:UniProtKB/Swiss-Prot;Acc:Q9FLC8]
AT1G78480	5.40748	1.01287	9.8021	-3.27464	0.00604516	0.0479244	down	609		F3F9.1 [Source:UniProtKB/TrEMBL;Acc:Q9M9G0]
AT5G17040	269.994	0.331537	539.656	-10.6687	4.33e-71	3.18e-68	down	1596	UGT78D4	UDP-glycosyltransferase 78D4 [Source:UniProtKB/Swiss-Prot;Acc:Q9LFJ9]
AT2G36270	49.7369	20.5724	78.9013	-1.93934	3.24e-05	0.000509949	down	1853	ABI5	Basic-leucine zipper (bZIP) transcription factor family protein [Source:TAIR;Acc:AT2G36270]
AT5G61410	1198.27	794.623	1601.92	-1.01146	1.43e-09	4.58e-08	down	1463	RPE	RPE [Source:UniProtKB/TrEMBL;Acc:A0A178UPG9]
AT1G09340	237.725	63.9793	411.47	-2.68511	1.5e-12	6.59e-11	down	1944	CRB	chloroplast RNA binding [Source:TAIR;Acc:AT1G09340]
AT1G30520	111.094	69.7598	152.428	-1.12766	1.8e-05	0.000298566	down	2312	AAE14	2-succinylbenzoate--CoA ligase, chloroplastic/peroxisomal [Source:UniProtKB/Swiss-Prot;Acc:Q8VYJ1]
AT4G34881	655.012	422.393	887.63	-1.07137	0.000176962	0.00234189	down	966		Transmembrane protein [Source:UniProtKB/TrEMBL;Acc:Q0WQ74]
AT1G73890	17.6751	2.76225	32.5879	-3.56042	0.000298388	0.00370938	down	582		Bifunctional inhibitor/lipid-transfer protein/seed storage 2S albumin superfamily protein [Source:UniProtKB/TrEMBL;Acc:Q9C9B1]
AT5G11070	163.991	114.728	213.253	-0.894349	0.000137359	0.0018682	down	944		Uncharacterized protein At5g11070 [Source:UniProtKB/TrEMBL;Acc:Q9FY58]
AT2G22240	527.629	321.598	733.661	-1.18985	1.19e-07	2.87e-06	down	2139	IPS2	Inositol-3-phosphate synthase isozyme 2 [Source:UniProtKB/Swiss-Prot;Acc:Q38862]
AT3G50970	5370.83	3467.32	7274.34	-1.069	0.000296828	0.00369182	down	969	XERO2	Dehydrin Xero 2 [Source:UniProtKB/Swiss-Prot;Acc:P42758]
AT3G55800	140.992	4.35542	277.628	-5.99419	1.53e-34	2.85e-32	down	1747	SBPASE	Sedoheptulose-1,7-bisphosphatase, chloroplastic [Source:UniProtKB/Swiss-Prot;Acc:P46283]
AT4G39710	50.9984	26.1152	75.8816	-1.53886	1.93e-05	0.000318166	down	1132	PNSL4	Photosynthetic NDH subunit of lumenal location 4, chloroplastic [Source:UniProtKB/Swiss-Prot;Acc:Q9SCY3]
AT2G17695	78.4366	43.0567	113.817	-1.4024	2.27e-06	4.44e-05	down	1320		FUNCTIONS IN: molecular_function unknown; INVOLVED IN: biological_process unknown; LOCATED IN: chloroplast; CONTAINS InterPro DOMAIN/s: Domain of unknown function DUF1990 (InterPro:IPR018960); Ha. [Source:TAIR;Acc:AT2G17695]
AT3G63520	3507.12	1225.64	5788.6	-2.23968	2.04e-35	4.12e-33	down	1931	CCD1	Carotenoid 9,10(9',10')-cleavage dioxygenase 1 [Source:UniProtKB/Swiss-Prot;Acc:O65572]
AT3G54990	307.851	238.319	377.383	-0.663133	0.00181155	0.0173604	down	892	SMZ	AP2-like ethylene-responsive transcription factor SMZ [Source:UniProtKB/Swiss-Prot;Acc:Q6PV68]
AT4G25640	7004.66	3057.07	10952.2	-1.84101	0.000285745	0.00357531	down	1958	ATDTX35	Protein DETOXIFICATION [Source:UniProtKB/TrEMBL;Acc:F4JTB2]
AT3G52870	1736.95	1436.7	2037.2	-0.503826	0.00189958	0.018093	down	1811	IQM3	IQ domain-containing protein IQM3 [Source:UniProtKB/Swiss-Prot;Acc:Q9LFA4]
AT5G11270	379.698	296.935	462.46	-0.639182	0.000578139	0.00650199	down	1509	OCP3	OCP3 [Source:UniProtKB/TrEMBL;Acc:A0A178UCN6]
AT2G29710	148.416	115.578	181.254	-0.649141	0.00512506	0.041643	down	1771	UGT71D2	UDP-glycosyltransferase 71D2 [Source:UniProtKB/Swiss-Prot;Acc:O82385]
AT3G45050	94.4704	63.6274	125.313	-0.977822	0.000360169	0.00437946	down	859		AT3G45050 protein [Source:UniProtKB/TrEMBL;Acc:B9DG54]
AT3G08700	45.6227	19.7247	71.5207	-1.85836	1.03e-06	2.14e-05	down	743	UBC12	Probable ubiquitin-conjugating enzyme E2 12 [Source:UniProtKB/Swiss-Prot;Acc:Q9C9Y7]
AT2G19590	426.022	318.031	534.014	-0.747708	4.02e-05	0.000622418	down	2225	ACO1	1-aminocyclopropane-1-carboxylate oxidase 1 [Source:UniProtKB/Swiss-Prot;Acc:Q9ZUN4]
AT3G07970	535.552	379.44	691.663	-0.8662	1.35e-06	2.75e-05	down	1656	QRT2	Polygalacturonase QRT2 [Source:UniProtKB/Swiss-Prot;Acc:Q9SFB7]
AT2G01620	158.997	100.806	217.187	-1.10736	1.23e-05	0.000210411	down	1029	SKIP28	F-box protein SKIP28 [Source:UniProtKB/Swiss-Prot;Acc:Q9ZU90]
AT5G12280	346.531	277.962	415.099	-0.578568	0.0028707	0.0256894	down	1418		SWAP (Suppressor-of-White-APricot)/surp RNA-binding domain-containing protein [Source:UniProtKB/TrEMBL;Acc:Q94CL4]
AT3G11210	269.614	207.047	332.181	-0.68201	0.000853857	0.00918172	down	1689	CPRD49	GDSL esterase/lipase CPRD49 [Source:UniProtKB/Swiss-Prot;Acc:Q9SRM5]
AT5G64330	945.638	787.012	1104.26	-0.488628	0.0030302	0.0268383	down	2494	RPT3	Root phototropism protein 3 [Source:UniProtKB/Swiss-Prot;Acc:Q9FMF5]
AT5G42780	245.224	194.595	295.852	-0.604401	0.00374754	0.0320128	down	1040	ZHD13	Zinc-finger homeodomain protein 13 [Source:UniProtKB/Swiss-Prot;Acc:Q9FMY7]
AT1G32172	7.14843	1.65768	12.6392	-2.93066	0.00360066	0.0310351	down	2042		other RNA [Source:TAIR;Acc:AT1G32172]
AT3G62820	52.2003	25.9682	78.4324	-1.5947	0.00184272	0.0176185	down	1195		Plant invertase/pectin methylesterase inhibitor superfamily protein [Source:UniProtKB/TrEMBL;Acc:Q9LZI3]
AT1G16460	1373.69	991.074	1756.3	-0.825474	4.81e-07	1.07e-05	down	1481	STR2	Thiosulfate/3-mercaptopyruvate sulfurtransferase 2 [Source:UniProtKB/Swiss-Prot;Acc:Q24JL3]
AT4G21570	1842.88	1563.58	2122.18	-0.440694	0.00584028	0.0465362	down	1558		Protein of unknown function (DUF300) [Source:TAIR;Acc:AT4G21570]
AT5G28640	880.821	736.731	1024.91	-0.476291	0.00559389	0.0449452	down	1592	GIF1	GRF1-interacting factor 1 [Source:UniProtKB/Swiss-Prot;Acc:Q8L8A5]
AT3G17170	225.891	170.922	280.86	-0.716511	0.000789527	0.00858594	down	1125	RFC3	AT3g17170/K14A17_29 [Source:UniProtKB/TrEMBL;Acc:Q948R9]
AT3G55630	84.2399	9.7789	158.701	-4.02049	1.34e-30	2.04e-28	down	1756	FPGS3	Folylpolyglutamate synthase [Source:UniProtKB/Swiss-Prot;Acc:Q8W035]
AT1G19700	1634.43	1351.57	1917.29	-0.504434	0.00314524	0.0277101	down	2176	BLH10	BEL1-like homeodomain protein 10 [Source:UniProtKB/Swiss-Prot;Acc:Q9FXG8]
AT2G48090	352.921	252.215	453.628	-0.846857	0.000766893	0.00837988	down	995		unknown protein; FUNCTIONS IN: molecular_function unknown; INVOLVED IN: biological_process unknown; LOCATED IN: chloroplast; EXPRESSED IN: male gametophyte, root, flower, carpel; EXPRESSED DURING: 4 anthesis, petal differentiation and expansion stage. [Source:TAIR;Acc:AT2G48090]
AT2G26340	229.445	148.95	309.939	-1.05715	7.52e-07	1.6e-05	down	1022		unknown protein; FUNCTIONS IN: molecular_function unknown; INVOLVED IN: biological_process unknown; LOCATED IN: chloroplast thylakoid membrane, chloroplast thylakoid lumen, chloroplast; EXPRESSED IN: 22 plant structures; EXPRESSED DURING: 13 growth /.../; Ha. [Source:TAIR;Acc:AT2G26340]
AT1G34340	673.064	554.27	791.858	-0.514652	0.00286883	0.0256819	down	1989		Alpha/beta-Hydrolases superfamily protein [Source:UniProtKB/TrEMBL;Acc:Q9XID7]
AT2G36990	332.749	111.196	554.302	-2.31757	1.52e-15	8.58e-14	down	2044	SIGF	RNA polymerase sigma factor sigF, chloroplastic [Source:UniProtKB/Swiss-Prot;Acc:Q9LD95]
AT1G69310	1182.78	323.791	2041.78	-2.65669	4.13e-09	1.23e-07	down	1582	WRKY57	At1g69310 [Source:UniProtKB/TrEMBL;Acc:Q147N6]
AT1G73990	1283.45	925.771	1641.13	-0.825963	7.27e-07	1.55e-05	down	2399	SPPA	Serine protease SPPA, chloroplastic [Source:UniProtKB/Swiss-Prot;Acc:Q9C9C0]
AT4G31390	608.435	434.819	782.051	-0.846847	1.67e-06	3.34e-05	down	2551	ABC1K1	AtACDO1 [Source:UniProtKB/TrEMBL;Acc:A0A178V5V0]
AT1G70710	2294.23	1626.68	2961.77	-0.864526	0.000994567	0.0104697	down	2081	CEL1	Endoglucanase 8 [Source:UniProtKB/Swiss-Prot;Acc:Q9CAC1]
AT5G25140	87.523	27.8467	147.199	-2.40219	2.05e-09	6.4e-08	down	1915	CYP71B13	Cytochrome P450 71B13 [Source:UniProtKB/Swiss-Prot;Acc:P58050]
AT1G31320	687.751	553.362	822.141	-0.571162	0.0012331	0.0125324	down	1203	LBD4	LOB domain-containing protein 4 [Source:UniProtKB/Swiss-Prot;Acc:Q9SHE9]
AT4G33660	100.035	11.2986	188.771	-4.06242	1.25e-34	2.36e-32	down	1333		Adhesive/proline-rich-like protein [Source:UniProtKB/TrEMBL;Acc:Q8LG30]
AT1G19140	984.847	547.336	1422.36	-1.37778	7.38e-16	4.25e-14	down	1399		FUNCTIONS IN: molecular_function unknown; INVOLVED IN: ubiquinone biosynthetic process; LOCATED IN: mitochondrion; EXPRESSED IN: 24 plant structures; EXPRESSED DURING: 15 growth stages; CONTAINS InterPro DOMAIN/s: COQ9 (InterPro:IPR013718), Ubiquino /.../synthesis protein COQ9 (InterPro:IPR012762); Ha. [Source:TAIR;Acc:AT1G19140]
AT5G04140	427.209	58.2756	796.142	-3.77206	1.28e-18	9.2e-17	down	5308	GLU1	glutamate synthase 1 [Source:TAIR;Acc:AT5G04140]
AT5G19940	365.399	79.5642	651.234	-3.03299	8.64e-47	2.67e-44	down	1036	PAP8	Probable plastid-lipid-associated protein 8, chloroplastic [Source:UniProtKB/Swiss-Prot;Acc:Q941D3]
AT5G43740	28.455	14.1806	42.7295	-1.59132	0.000429159	0.00507764	down	3073		Probable disease resistance protein At5g43740 [Source:UniProtKB/Swiss-Prot;Acc:Q9FG90]
AT5G01530	1061.35	298.649	1824.05	-2.61062	1.63e-47	5.09e-45	down	1396	LHCB4.1	Chlorophyll a-b binding protein CP29.1, chloroplastic [Source:UniProtKB/Swiss-Prot;Acc:Q07473]
AT5G47110	914.028	92.5549	1735.5	-4.2289	5.86e-35	1.14e-32	down	1185	LIL3.2	Light-harvesting complex-like protein 3 isotype 2, chloroplastic [Source:UniProtKB/Swiss-Prot;Acc:Q6NKS4]
AT5G02840	890.667	624.29	1157.04	-0.890155	0.000112524	0.00156358	down	1395	RVE4	LCL1 [Source:UniProtKB/TrEMBL;Acc:A0A178U8Z5]
AT5G61640	745.558	541.825	949.291	-0.809024	0.000209214	0.00270153	down	959	PMSR1	peptidemethionine sulfoxide reductase 1 [Source:TAIR;Acc:AT5G61640]
AT4G13250	501.706	397.911	605.5	-0.605681	0.00104564	0.0109338	down	1958	NYC1	Probable chlorophyll(ide) b reductase NYC1, chloroplastic [Source:UniProtKB/Swiss-Prot;Acc:Q93ZA0]
AT5G37260	2904.4	1980.82	3827.98	-0.950487	0.00039098	0.00468802	down	980	RVE2	Protein REVEILLE 2 [Source:UniProtKB/Swiss-Prot;Acc:F4K5X6]
AT5G38520	110.041	0.635485	219.446	-8.43179	7.09e-51	2.77e-48	down	1478		Alpha/beta-Hydrolases superfamily protein [Source:UniProtKB/TrEMBL;Acc:F4KBJ3]
AT5G64040	204.094	31.8061	376.382	-3.56482	7.15e-45	2.15e-42	down	936	PSAN	Photosystem I reaction center subunit PSI-N, chloroplast, putative / PSI-N, putative (PSAN) [Source:UniProtKB/TrEMBL;Acc:F4KC80]
AT1G03630	163.892	83.198	244.585	-1.55572	2.89e-08	7.74e-07	down	1583	PORC	Protochlorophyllide reductase C, chloroplastic [Source:UniProtKB/Swiss-Prot;Acc:O48741]
AT1G70480	929.51	716.24	1142.78	-0.674033	0.000593512	0.00665627	down	1593		Domain of unknown function (DUF220) [Source:TAIR;Acc:AT1G70480]
AT2G18480	335.23	210.611	459.849	-1.12658	0.000885502	0.00949343	down	2042	PLT3	Probable polyol transporter 3 [Source:UniProtKB/Swiss-Prot;Acc:Q9ZNS0]
AT1G12240	3320.26	2603.4	4037.12	-0.632931	4.24e-05	0.000651468	down	2249	BFRUCT4	Acid beta-fructofuranosidase 4, vacuolar [Source:UniProtKB/Swiss-Prot;Acc:Q39041]
AT2G35820	20.5532	4.80625	36.3002	-2.91699	0.00020795	0.00268732	down	1159		ureidoglycolate hydrolases [Source:TAIR;Acc:AT2G35820]
AT1G29070	347.265	216.934	477.596	-1.13854	7.2e-09	2.08e-07	down	819	RPL34	50S ribosomal protein L34, chloroplastic [Source:UniProtKB/Swiss-Prot;Acc:Q9LP37]
AT3G61470	567.283	31.1154	1103.45	-5.14825	3.83e-70	2.74e-67	down	1408	LHCA2	Photosystem I chlorophyll a/b-binding protein 2, chloroplastic [Source:UniProtKB/Swiss-Prot;Acc:Q9SYW8]
AT1G18660	1666.37	888.25	2444.48	-1.46049	3.22e-17	2.06e-15	down	2174		Zinc finger (C3HC4-type RING finger) family protein [Source:UniProtKB/TrEMBL;Acc:F4ICB5]
AT3G12955	143.955	41.0055	246.905	-2.59006	7.72e-19	5.63e-17	down	738		At3g12955 [Source:UniProtKB/TrEMBL;Acc:Q9LSI2]
AT2G04842	389.082	264.942	513.223	-0.953907	4.07e-07	9.13e-06	down	2344	EMB2761	Threonine--tRNA ligase, chloroplastic/mitochondrial 2 [Source:UniProtKB/Swiss-Prot;Acc:F4IFC5]
AT4G00050	19.575	0.377384	38.7727	-6.68286	1.71e-11	6.69e-10	down	1525	UNE10	Transcription factor UNE10 [Source:UniProtKB/Swiss-Prot;Acc:Q8GZ38]
AT4G15630	100.672	72.7267	128.617	-0.822528	0.00243732	0.0223961	down	1032		CASP-like protein 1E1 [Source:UniProtKB/Swiss-Prot;Acc:Q8L8Z1]
AT3G53830	106.468	77.597	135.339	-0.802508	0.0019468	0.0184871	down	2076		Regulator of chromosome condensation (RCC1) family protein [Source:UniProtKB/TrEMBL;Acc:A0A1I9LSN7]
AT3G26300	688.568	484.846	892.289	-0.879983	2.92e-05	0.000463926	down	1800	CYP71B34	Cytochrome P450 71B34 [Source:UniProtKB/Swiss-Prot;Acc:Q9LIP6]
AT4G28530	133.193	99.4211	166.966	-0.747928	0.00289024	0.0258387	down	1475	anac074	At4g28530 [Source:UniProtKB/TrEMBL;Acc:Q8GUJ6]
AT4G12917	7.30117	0	14.6023	#NAME?	2.83e-06	5.44e-05	down	553		other RNA [Source:TAIR;Acc:AT4G12917]
AT2G41040	328.822	181.83	475.815	-1.38781	0.000458463	0.00535594	down	1389		Uncharacterized methyltransferase At2g41040, chloroplastic [Source:UniProtKB/Swiss-Prot;Acc:Q0WPT7]
AT5G17490	198.079	141.062	255.095	-0.854709	0.00115902	0.0119249	down	2258	RGL3	DELLA protein RGL3 [Source:UniProtKB/Swiss-Prot;Acc:Q9LF53]
AT5G04400	4.31642	0.331537	8.3013	-4.6461	0.00550855	0.0443307	down	735	anac077	NAC domain containing protein 77 [Source:TAIR;Acc:AT5G04400]
AT1G70000	661.064	448.143	873.984	-0.963648	8.09e-06	0.000142938	down	1558		At1g70000 [Source:UniProtKB/TrEMBL;Acc:O04544]
AT5G16980	252.116	88.1261	416.105	-2.23931	0.000192661	0.00251505	down	1701		Zinc-binding dehydrogenase family protein [Source:UniProtKB/TrEMBL;Acc:F4KFK3]
AT2G29180	20.6661	4.23487	37.0974	-3.13093	0.000112989	0.00156743	down	791		Transmembrane protein [Source:UniProtKB/TrEMBL;Acc:Q9ZW05]
AT4G31650	278.549	205.89	351.207	-0.770446	0.000105403	0.00147943	down	1776		Transcriptional factor B3 family protein [Source:TAIR;Acc:AT4G31650]
AT2G29450	1181.04	420.29	1941.8	-2.20793	2.15e-09	6.7e-08	down	1270	GSTU5	GSTU5 [Source:UniProtKB/TrEMBL;Acc:A0A178VPP0]
AT5G50130	268.039	158.142	377.936	-1.25692	4.49e-09	1.34e-07	down	2080		NAD(P)-binding Rossmann-fold superfamily protein [Source:UniProtKB/TrEMBL;Acc:Q8RWK2]
AT4G34830	229.203	21.2159	437.191	-4.36504	2.66e-62	1.59e-59	down	3790	MRL1	Pentatricopeptide repeat-containing protein MRL1, chloroplastic [Source:UniProtKB/Swiss-Prot;Acc:Q0WLC6]
AT1G67090	2400.9	24.926	4776.88	-7.58227	4.66e-236	1.17e-231	down	1143	RBCS-1A	Ribulose bisphosphate carboxylase small chain [Source:UniProtKB/TrEMBL;Acc:A0A178WD57]
AT2G21180	312.963	241.646	384.28	-0.669265	0.00530868	0.042874	down	972		At2g21180/F26H11.6 [Source:UniProtKB/TrEMBL;Acc:Q9SKP5]
AT4G37310	884.145	324.627	1443.66	-2.15288	7.93e-14	3.87e-12	down	2081	CYP81H1	Cytochrome P450, family 81, subfamily H, polypeptide 1 [Source:UniProtKB/TrEMBL;Acc:Q9SW67]
AT2G14910	2132.3	1713.43	2551.17	-0.574268	0.00519466	0.0420481	down	1919		MAR-binding filament-like protein [Source:UniProtKB/TrEMBL;Acc:O82329]
AT2G17240	438.191	348.642	527.741	-0.598084	0.00130108	0.0130799	down	835		Arginine/serine-rich-like splicing factor [Source:UniProtKB/TrEMBL;Acc:Q9SII4]
AT3G52540	59.4885	40.4422	78.5348	-0.95747	0.00313248	0.0276268	down	1348	OFP18	Transcription repressor OFP18 [Source:UniProtKB/Swiss-Prot;Acc:Q9SVD5]
AT3G50790	256.919	198.475	315.363	-0.668056	0.00145704	0.0143762	down	1610		Esterase/lipase/thioesterase family protein [Source:UniProtKB/TrEMBL;Acc:Q9SVL9]
AT4G25290	171.885	121.649	222.122	-0.868631	0.000136406	0.00185625	down	2381		DNA photolyase [Source:UniProtKB/TrEMBL;Acc:F4JSJ6]
AT3G56650	103.545	41.9534	165.137	-1.97681	1.57e-12	6.87e-11	down	1356	PPD6	PPD6 [Source:UniProtKB/TrEMBL;Acc:A0A384KSV2]
AT3G44200	2393.43	1882.71	2904.15	-0.62531	7.98e-05	0.00115558	down	3811	NEK5	Serine/threonine-protein kinase Nek5 [Source:UniProtKB/Swiss-Prot;Acc:Q0WPH8]
AT1G64680	28.0781	1.24338	54.9129	-5.4648	1e-16	6.14e-15	down	1262		At1g64680 [Source:UniProtKB/TrEMBL;Acc:Q9SGU7]
AT1G72130	1228.97	986.885	1471.05	-0.575888	0.000475311	0.00553468	down	1809	NPF5.11	Protein NRT1/ PTR FAMILY 5.11 [Source:UniProtKB/Swiss-Prot;Acc:Q8RX67]
AT2G40230	826.53	602.6	1050.46	-0.801749	0.000898854	0.00962832	down	1744		HXXXD-type acyl-transferase family protein [Source:UniProtKB/TrEMBL;Acc:Q9XEF2]
AT1G55000	405.085	262.879	547.291	-1.05791	0.00053845	0.00613842	down	1083		F-box protein At1g55000 [Source:UniProtKB/Swiss-Prot;Acc:Q9FZ32]
AT4G29400	85.6457	61.0133	110.278	-0.853952	0.00224546	0.0209015	down	1279		Oxidoreductase/transition metal ion-binding protein (DUF3531) [Source:UniProtKB/TrEMBL;Acc:Q5XV66]
AT2G42690	187.509	114.284	260.734	-1.18995	1.54e-07	3.64e-06	down	1389		Phospholipase A1-IIdelta [Source:UniProtKB/Swiss-Prot;Acc:Q9SJI7]
AT3G51820	461.406	27.6442	895.169	-5.01711	4.82e-100	1.21e-96	down	1729	CHLG	Chlorophyll synthase, chloroplastic [Source:UniProtKB/Swiss-Prot;Acc:Q38833]
AT5G47190	366.558	242.948	490.167	-1.01263	4.09e-06	7.64e-05	down	1009		50S ribosomal protein L19-2, chloroplastic [Source:UniProtKB/Swiss-Prot;Acc:Q8RXX5]
AT1G13250	395.131	301.47	488.792	-0.697207	0.000177374	0.00234404	down	1738	GATL3	Probable galacturonosyltransferase-like 3 [Source:UniProtKB/Swiss-Prot;Acc:Q0V7R1]
AT1G13930	17204.6	7270	27139.2	-1.90035	6.94e-32	1.11e-29	down	823		At1g13930/F16A14.27 [Source:UniProtKB/TrEMBL;Acc:Q9XI93]
AT5G38030	2834.58	2251.38	3417.79	-0.602255	0.000139084	0.00188961	down	2104	DTX30	Protein DETOXIFICATION 30 [Source:UniProtKB/Swiss-Prot;Acc:Q9LS19]
AT1G72490	531.529	246.742	816.315	-1.72612	5.66e-05	0.000848696	down	1605		unknown protein; BEST Arabidopsis thaliana protein match is: unknown protein (TAIR:AT1G17400.1); Ha. [Source:TAIR;Acc:AT1G72490]
AT2G32090	397.662	307.579	487.745	-0.665171	0.000425359	0.0050494	down	853		At2g32090/F22D22.16 [Source:UniProtKB/TrEMBL;Acc:Q9SKZ0]
AT1G54730	531.188	435.339	627.037	-0.526411	0.00348129	0.0301607	down	1845		Sugar transporter ERD6-like 5 [Source:UniProtKB/Swiss-Prot;Acc:Q3ECP7]
AT5G65310	4991.47	3940.85	6042.08	-0.616539	6.13e-05	0.000914143	down	1849	ATHB-5	Homeobox-leucine zipper protein ATHB-5 [Source:UniProtKB/Swiss-Prot;Acc:P46667]
AT2G32530	109.984	13.8503	206.117	-3.89548	5.01e-35	9.79e-33	down	2617	CSLB3	Cellulose synthase-like protein B3 [Source:UniProtKB/Swiss-Prot;Acc:Q8RX83]
AT1G30380	315.231	18.8489	611.612	-5.02007	1.79e-85	2.13e-82	down	769	PSAK	Photosystem I reaction center subunit psaK, chloroplastic [Source:UniProtKB/Swiss-Prot;Acc:Q9SUI5]
AT1G78200	276.399	221.136	331.663	-0.58478	0.00447618	0.0370845	down	1434		Probable protein phosphatase 2C 17 [Source:UniProtKB/Swiss-Prot;Acc:Q8L7I4]
AT2G40880	146.369	95.5149	197.223	-1.04603	1.13e-05	0.00019511	down	645	CYS3	Cysteine proteinase inhibitor [Source:UniProtKB/TrEMBL;Acc:A0A178VXG7]
AT4G20820	801.47	542.995	1059.95	-0.96498	0.000593721	0.00665627	down	1955		Berberine bridge enzyme-like 18 [Source:UniProtKB/Swiss-Prot;Acc:Q9SVG5]
AT4G03410	180.983	135.187	226.78	-0.746342	0.00111429	0.0115263	down	1894		Peroxisomal membrane 22 kDa (Mpv17/PMP22) family protein [Source:UniProtKB/TrEMBL;Acc:F4JI90]
AT3G21520	210.332	129.845	290.819	-1.16333	0.000164754	0.00219895	down	835	DMP1	Protein DMP1 [Source:UniProtKB/Swiss-Prot;Acc:Q9LVF4]
AT5G08610	878.573	727.394	1029.75	-0.501486	0.00401844	0.0338871	down	2811	RH26	PDE340 [Source:UniProtKB/TrEMBL;Acc:A0A178UFQ6]
AT1G08520	1093.44	667.918	1518.96	-1.18534	1.25e-06	2.56e-05	down	2643	CHLD	Mg-protoporphyrin IX chelatase [Source:UniProtKB/TrEMBL;Acc:A0A178W355]
AT4G15500	811.779	652.399	971.159	-0.573952	0.00050406	0.00580052	down	1717	UGT84A4	UDP-glycosyltransferase 84A4 [Source:UniProtKB/Swiss-Prot;Acc:O23402]
AT3G29185	279.257	171.77	386.745	-1.1709	1.37e-08	3.82e-07	down	1694		Glutamate NMDA receptor subunit epsilon-1, putative (DUF3598) [Source:UniProtKB/TrEMBL;Acc:F4J1U2]
AT1G67830	209.363	130.576	288.151	-1.14193	5.16e-05	0.000779942	down	1394	FXG1	Alpha-L-fucosidase 3 [Source:UniProtKB/Swiss-Prot;Acc:Q9FXE5]
AT1G28570	264.635	181.376	347.893	-0.939658	5.73e-06	0.000104293	down	1225		GDSL esterase/lipase At1g28570 [Source:UniProtKB/Swiss-Prot;Acc:Q9FXJ1]
AT4G18480	370.569	131.018	610.119	-2.21932	7.21e-28	9.54e-26	down	1608	CHLI1	Magnesium-chelatase subunit ChlI-1, chloroplastic [Source:UniProtKB/Swiss-Prot;Acc:P16127]
AT3G62910	186.425	102.431	270.419	-1.40055	5.12e-10	1.74e-08	down	1620	APG3	Peptide chain release factor APG3, chloroplastic [Source:UniProtKB/Swiss-Prot;Acc:Q8RX79]
AT2G30570	270.145	6.12347	534.168	-6.4468	1.41e-98	2.94e-95	down	958	PSBW	PSBW [Source:UniProtKB/TrEMBL;Acc:A0A178VQ32]
AT4G21190	111.053	78.75	143.357	-0.864257	0.00102275	0.0107213	down	1313	EMB1417	Pentatricopeptide repeat-containing protein At4g21190 [Source:UniProtKB/Swiss-Prot;Acc:Q8LG95]
AT1G20620	15158.8	10313.3	20004.3	-0.955803	0.000199184	0.00259343	down	2339	CAT3	catalase 3 [Source:TAIR;Acc:AT1G20620]
AT3G44630	171.805	132.957	210.654	-0.663913	0.00317885	0.0279569	down	4375		Disease resistance protein (TIR-NBS-LRR class) family [Source:UniProtKB/TrEMBL;Acc:F4J359]
AT5G64940	762.249	151.385	1373.11	-3.18115	2.91e-26	3.58e-24	down	2828	ATATH13	Protein ACTIVITY OF BC1 COMPLEX KINASE 8, chloroplastic [Source:UniProtKB/Swiss-Prot;Acc:Q93Y08]
AT1G49650	145.946	89.1873	202.705	-1.18447	6.6e-07	1.42e-05	down	1481	CXE4	Probable carboxylesterase 4, mitochondrial [Source:UniProtKB/Swiss-Prot;Acc:Q9FX93]
AT1G49380	152.523	89.0778	215.968	-1.27768	5.75e-08	1.46e-06	down	2123	CCS1	Cytochrome c biogenesis protein CCS1, chloroplastic [Source:UniProtKB/Swiss-Prot;Acc:Q9XIA4]
AT4G23670	32646.9	23324.4	41969.4	-0.847501	4.49e-08	1.16e-06	down	1121		AT4G23670 protein [Source:UniProtKB/TrEMBL;Acc:Q9SUR0]
AT2G35940	1197.74	729.44	1666.04	-1.19156	8.53e-06	0.000150008	down	2806	BLH1	BEL1-like homeodomain protein 1 [Source:UniProtKB/Swiss-Prot;Acc:Q9SJ56]
AT2G43900	507.256	283.374	731.138	-1.36744	2.08e-13	9.83e-12	down	4478		Endonuclease/exonuclease/phosphatase family protein [Source:TAIR;Acc:AT2G43900]
AT2G16385	258.095	198.617	317.573	-0.677098	0.000982729	0.0103669	down	658	CIF1	Protein CASPARIAN STRIP INTEGRITY FACTOR 1 [Source:UniProtKB/Swiss-Prot;Acc:Q84MD2]
AT5G65470	1259.26	1044.73	1473.79	-0.496405	0.00272016	0.0245797	down	2166	OFUT39	O-fucosyltransferase 39 [Source:UniProtKB/Swiss-Prot;Acc:Q0WUZ5]
AT5G56760	4121.33	3146.43	5096.23	-0.695716	0.000553571	0.00627933	down	1339	SAT5	Serine acetyltransferase 5 [Source:UniProtKB/Swiss-Prot;Acc:Q42538]
AT5G58140	283.568	158.07	409.065	-1.37177	2.27e-11	8.73e-10	down	4489	PHOT2	Phototropin-2 [Source:UniProtKB/Swiss-Prot;Acc:P93025]
AT3G48700	27.9008	9.50254	46.299	-2.2846	1.71e-06	3.4e-05	down	1232	CXE13	Probable carboxylesterase 13 [Source:UniProtKB/Swiss-Prot;Acc:Q9SMM9]
AT2G31380	37.9226	11.8951	63.9502	-2.42659	7.56e-05	0.00110311	down	1268	BBX25	B-box zinc finger protein 25 [Source:UniProtKB/Swiss-Prot;Acc:Q9SID1]
AT2G40100	87.9805	20.1105	155.85	-2.95414	3.56e-21	3.04e-19	down	1096	LHCB4.3	Chlorophyll a-b binding protein, chloroplastic [Source:UniProtKB/TrEMBL;Acc:A0A178VTY4]
AT4G11570	833.472	672.477	994.467	-0.564439	0.0012502	0.0126599	down	1696	PYRP2	5-amino-6-(5-phospho-D-ribitylamino)uracil phosphatase, chloroplastic [Source:UniProtKB/Swiss-Prot;Acc:Q9LDD5]
AT1G54350	287.023	201.013	373.033	-0.892016	1.05e-05	0.000181164	down	2338	ABCC2	ABC transporter D family member 2, chloroplastic [Source:UniProtKB/Swiss-Prot;Acc:Q6NLC1]
AT3G57020	4811.25	651.787	8970.71	-3.78275	4.28e-38	9.38e-36	down	1478	SSL9	Protein STRICTOSIDINE SYNTHASE-LIKE 9 [Source:UniProtKB/Swiss-Prot;Acc:Q9M1J6]
AT5G51100	176.115	137.395	214.835	-0.644902	0.00433783	0.0361418	down	1153	FSD2	Superoxide dismutase [Fe] 2, chloroplastic [Source:UniProtKB/Swiss-Prot;Acc:Q9LU64]
AT1G06460	68.809	44.3468	93.2712	-1.0726	0.000509781	0.00585161	down	1321	ACD32.1	Alpha-crystallin domain 32.1 [Source:UniProtKB/TrEMBL;Acc:Q208N7]
AT2G40920	206.015	132.115	279.915	-1.0832	1.04e-06	2.16e-05	down	1575		F-box/LRR-repeat protein At2g40920 [Source:UniProtKB/Swiss-Prot;Acc:Q2V414]
AT5G10230	578.889	403.8	753.979	-0.900885	0.0017682	0.0170166	down	1279	ANNAT7	Annexin D7 [Source:UniProtKB/Swiss-Prot;Acc:Q9LX07]
AT5G18840	568.782	462.767	674.797	-0.544168	0.00192919	0.0183541	down	1890		Sugar transporter ERD6-like 16 [Source:UniProtKB/Swiss-Prot;Acc:Q8LBI9]
AT5G36870	194.577	136.544	252.61	-0.887546	4.66e-05	0.000710053	down	5714	CALS4	Callose synthase 4 [Source:UniProtKB/Swiss-Prot;Acc:Q9LTG5]
AT5G46270	217.006	76.9763	357.036	-2.21358	5.01e-23	4.87e-21	down	4126		Disease resistance protein (TIR-NBS-LRR class) family [Source:TAIR;Acc:AT5G46270]
AT1G67740	196.007	9.56832	382.445	-5.32084	6.31e-29	8.86e-27	down	1219	PSBY	Putative uncharacterized protein [Source:UniProtKB/TrEMBL;Acc:Q549N8]
AT1G03050	7.57316	0.377384	14.7689	-5.29039	1.71e-05	0.000285425	down	2222		Putative clathrin assembly protein At1g03050 [Source:UniProtKB/Swiss-Prot;Acc:Q9SA65]
AT3G18390	755.894	546.338	965.451	-0.821409	2.23e-06	4.36e-05	down	3126	EMB1865	CRS1 / YhbY (CRM) domain-containing protein [Source:UniProtKB/TrEMBL;Acc:Q9LS51]
AT5G58260	8.6116	0	17.2232	#NAME?	2.87e-07	6.59e-06	down	1059	ndhN	NdhN [Source:UniProtKB/TrEMBL;Acc:A0A178UG88]
AT1G75460	20.3915	0.377384	40.4056	-6.74238	1.33e-14	6.97e-13	down	2067		ATP-dependent protease La (LON) domain protein [Source:UniProtKB/TrEMBL;Acc:Q9FWT4]
AT4G24750	454.996	372.031	537.96	-0.532073	0.00482988	0.0395305	down	1528	STR11	Rhodanese-like domain-containing protein 11, chloroplastic [Source:UniProtKB/Swiss-Prot;Acc:Q0WWT7]
AT4G30580	778.037	617.482	938.592	-0.604101	0.000596891	0.00668582	down	1520	LPAT1	1-acyl-sn-glycerol-3-phosphate acyltransferase 1, chloroplastic [Source:UniProtKB/Swiss-Prot;Acc:Q8GXU8]
AT1G69480	166.792	121.415	212.169	-0.805263	0.00469492	0.03859	down	2773	PHO1-H10	Phosphate transporter PHO1 homolog 10 [Source:UniProtKB/Swiss-Prot;Acc:Q6R8G0]
AT1G64625	132.017	93.6044	170.429	-0.864524	0.000604991	0.00676745	down	1972	BHLH157	Transcription factor bHLH157 [Source:UniProtKB/Swiss-Prot;Acc:Q7XJU0]
AT5G48910	236.024	132.154	339.894	-1.36287	1.28e-10	4.58e-09	down	2364	PCMP-H38	Pentatricopeptide repeat-containing protein At5g48910 [Source:UniProtKB/Swiss-Prot;Acc:Q9FI80]
AT5G13790	65.8348	40.8463	90.8234	-1.15286	0.0002381	0.00304778	down	1158	AGL15	AGL15 [Source:UniProtKB/TrEMBL;Acc:A0A384LKZ8]
AT5G54790	110.979	61.1105	160.848	-1.3962	1.53e-05	0.000256591	down	937	VUP4	Vascular-related unknown protein 4 [Source:UniProtKB/Swiss-Prot;Acc:Q5BPG5]
AT5G18660	91.8194	39.0052	144.634	-1.89066	4.64e-11	1.74e-09	down	1591	DVR	Divinyl chlorophyllide a 8-vinyl-reductase, chloroplastic [Source:UniProtKB/Swiss-Prot;Acc:Q1H537]
AT2G38330	167.214	90.9686	243.46	-1.42025	1.76e-09	5.55e-08	down	1753	DTX44	Protein DETOXIFICATION [Source:UniProtKB/TrEMBL;Acc:A0A178VTF1]
AT3G26070	240.614	33.3962	447.832	-3.7452	3.04e-53	1.38e-50	down	1450	PAP4	Probable plastid-lipid-associated protein 4, chloroplastic [Source:UniProtKB/Swiss-Prot;Acc:Q9LU85]
AT4G11600	10497.7	7223.72	13771.6	-0.930884	1.43e-09	4.58e-08	down	1027	GPX6	Probable phospholipid hydroperoxide glutathione peroxidase 6, mitochondrial [Source:UniProtKB/Swiss-Prot;Acc:O48646]
AT1G22750	1006.36	511.919	1500.79	-1.55174	9.88e-20	7.68e-18	down	1115		AT1G22750 protein [Source:UniProtKB/TrEMBL;Acc:O64379]
AT3G20820	262.972	128.112	397.832	-1.63475	2.36e-14	1.2e-12	down	1586		Leucine-rich repeat (LRR) family protein [Source:UniProtKB/TrEMBL;Acc:Q9LT39]
AT3G62990	14.717	6.39137	23.0426	-1.85011	0.00435934	0.0362969	down	786		At3g62990 [Source:UniProtKB/TrEMBL;Acc:A0JPZ2]
AT1G11430	536.446	424.992	647.9	-0.608337	0.000614685	0.00686293	down	1038	MORF9	Multiple organellar RNA editing factor 9, chloroplastic [Source:UniProtKB/Swiss-Prot;Acc:Q9LPZ1]
AT3G47030	9.89738	2.09917	17.6956	-3.07549	0.000495722	0.00572173	down	1476		F-box protein At3g47030 [Source:UniProtKB/Swiss-Prot;Acc:Q9SD70]
AT5G28500	166.884	10.0357	323.733	-5.01159	3.83e-61	2.23e-58	down	1558	RAF1.1	Rubisco accumulation factor 1.1, chloroplastic [Source:UniProtKB/Swiss-Prot;Acc:Q9LKR8]
AT3G02830	355.17	170.199	540.14	-1.66611	5.51e-17	3.44e-15	down	1774	ZFN1	Zinc finger CCCH domain-containing protein 33 [Source:UniProtKB/Swiss-Prot;Acc:Q8GXX7]
AT5G25810	1496.11	576.899	2415.32	-2.06583	8.76e-27	1.11e-24	down	1357	TINY	Tny [Source:UniProtKB/TrEMBL;Acc:A0A178URN2]
AT3G59780	452.834	202.897	702.771	-1.79231	4.01e-21	3.41e-19	down	2734		Rhodanese/Cell cycle control phosphatase superfamily protein [Source:UniProtKB/TrEMBL;Acc:F4J9G2]
AT5G05270	3687.16	250.574	7123.74	-4.82932	1.83e-22	1.72e-20	down	1239	CHI3	Probable chalcone--flavonone isomerase 3 [Source:UniProtKB/Swiss-Prot;Acc:Q8VZW3]
AT1G42970	380.099	9.13448	751.063	-6.36147	5.06e-116	2.53e-112	down	1854	GAPB	Glyceraldehyde-3-phosphate dehydrogenase GAPB, chloroplastic [Source:UniProtKB/Swiss-Prot;Acc:P25857]
AT2G23600	621.21	373.148	869.271	-1.22006	1.01e-06	2.1e-05	down	1292	ACL	acetone-cyanohydrin lyase [Source:TAIR;Acc:AT2G23600]
AT4G27700	122.478	36.7244	208.231	-2.50337	8.64e-20	6.77e-18	down	1097		Rhodanese-like domain-containing protein 14, chloroplastic [Source:UniProtKB/Swiss-Prot;Acc:Q94A65]
AT4G02770	325.309	16.8978	633.72	-5.22893	2.21e-39	5.07e-37	down	1134	PSAD1	Photosystem I reaction center subunit II-1, chloroplastic [Source:UniProtKB/Swiss-Prot;Acc:Q9S7H1]
AT5G24850	655.919	168.288	1143.55	-2.76452	5.63e-28	7.5e-26	down	1917	CRYD	Cryptochrome DASH, chloroplastic/mitochondrial [Source:UniProtKB/Swiss-Prot;Acc:Q84KJ5]
AT2G35490	521.005	407.009	635.001	-0.641698	0.00266302	0.0241419	down	1439	PAP3	Probable plastid-lipid-associated protein 3, chloroplastic [Source:UniProtKB/Swiss-Prot;Acc:O82291]
AT1G14345	54.8572	7.16352	102.551	-3.83953	2.86e-21	2.47e-19	down	1010		NAD(P)-linked oxidoreductase superfamily protein [Source:UniProtKB/TrEMBL;Acc:Q949S6]
AT2G46915	708.419	589.194	827.645	-0.490268	0.00435915	0.0362969	down	2186		Protein of unknown function (DUF3754) [Source:TAIR;Acc:AT2G46915]
AT2G46910	205.84	148.998	262.681	-0.818015	0.000164128	0.00219176	down	1055	PAP10	Probable plastid-lipid-associated protein 10, chloroplastic [Source:UniProtKB/Swiss-Prot;Acc:Q8W4F1]
AT3G09260	310558	211698	409419	-0.951567	8.86e-07	1.87e-05	down	1806	BGLU23	PYK10 [Source:UniProtKB/TrEMBL;Acc:A0A178VCN3]
AT1G27030	4431.79	3592.03	5271.55	-0.553427	0.000477929	0.00556257	down	1596		At1g27030/T7N9_9 [Source:UniProtKB/TrEMBL;Acc:Q9LFY3]
AT5G02710	58.7234	32.7251	84.7218	-1.37234	0.000635098	0.00706632	down	1440		At5g02710 [Source:UniProtKB/TrEMBL;Acc:Q9LZ14]
AT5G16970	1888.08	1150.27	2625.89	-1.19083	0.0013181	0.0132137	down	1441	AER	NADPH-dependent oxidoreductase 2-alkenal reductase [Source:UniProtKB/Swiss-Prot;Acc:Q39172]
AT3G11170	648.103	505.937	790.269	-0.643386	0.000287653	0.00359559	down	2089	FAD7	sn-2 acyl-lipid omega-3 desaturase (ferredoxin), chloroplastic [Source:UniProtKB/Swiss-Prot;Acc:P46310]
AT1G23010	536.552	190.73	882.375	-2.20986	2.69e-06	5.2e-05	down	2292	LPR1	Multicopper oxidase LPR1 [Source:UniProtKB/Swiss-Prot;Acc:F4I4K5]
AT5G62210	965.936	7.96541	1923.91	-7.91607	5.37e-52	2.2e-49	down	1233		Embryo-specific protein 3, (ATS3) [Source:UniProtKB/TrEMBL;Acc:Q9LVB5]
AT3G06270	441.997	341.057	542.938	-0.670776	0.000299257	0.0037165	down	2126		Probable protein phosphatase 2C 35 [Source:UniProtKB/Swiss-Prot;Acc:Q7XJ53]
AT2G25950	607.434	484.889	729.978	-0.590196	0.000958268	0.010156	down	956		At2g25950 [Source:UniProtKB/TrEMBL;Acc:O82808]
AT3G49780	2858.34	764.351	4952.33	-2.6958	0.00253378	0.0231464	down	1642	PSK3	Phytosulfokines 3 [Source:UniProtKB/Swiss-Prot;Acc:Q9M2Y0]
AT3G12080	599.656	415.069	784.242	-0.917948	3.19e-06	6.08e-05	down	2231	emb2738	Emb2738 [Source:UniProtKB/TrEMBL;Acc:A0A384LJ95]
AT2G24020	388.366	315.891	460.841	-0.544839	0.00356448	0.0307643	down	907	STIC2	Nucleoid-associated protein At2g24020, chloroplastic [Source:UniProtKB/Swiss-Prot;Acc:O82230]
AT3G62030	734.089	534.824	933.353	-0.803358	3.62e-06	6.84e-05	down	1139	ROC4	Rotamase CYP 4 [Source:UniProtKB/TrEMBL;Acc:F4IX26]
AT1G14700	43.1409	13.2513	73.0304	-2.46236	7.73e-05	0.00112519	down	1456	PAP3	Purple acid phosphatase 3 [Source:UniProtKB/Swiss-Prot;Acc:Q8H129]
AT2G30950	1719.51	906.198	2532.83	-1.48285	2.74e-19	2.08e-17	down	2386	VAR2	FtsH extracellular protease family [Source:TAIR;Acc:AT2G30950]
AT3G57530	2710.53	2306.05	3115.01	-0.433809	0.00564959	0.0453054	down	2418	CPK32	Calcium-dependent protein kinase 32 [Source:UniProtKB/Swiss-Prot;Acc:Q6NLQ6]
AT5G44660	267.789	168.808	366.77	-1.11949	8.03e-07	1.7e-05	down	1552		At5g44650 [Source:UniProtKB/TrEMBL;Acc:Q9LU00]
AT3G04940	1389.98	1075.29	1704.66	-0.664754	7.2e-05	0.00105645	down	1480	CYSD1	Bifunctional L-3-cyanoalanine synthase/cysteine synthase D1 [Source:UniProtKB/Swiss-Prot;Acc:Q9S6Z7]
AT5G65220	871.319	530.286	1212.35	-1.19297	8.29e-09	2.38e-07	down	834	RPL29	AT5G65220 protein [Source:UniProtKB/TrEMBL;Acc:B9DH43]
AT5G58750	238.947	190.391	287.503	-0.594613	0.00418567	0.0350441	down	1439		At5g58750 [Source:UniProtKB/TrEMBL;Acc:Q9LUY6]
AT2G30170	117.738	81.6337	153.842	-0.914214	0.000463718	0.00541227	down	1102		Probable protein phosphatase 2C 26 [Source:UniProtKB/Swiss-Prot;Acc:O64730]
AT1G78510	378.169	169.005	587.333	-1.79711	3.9e-20	3.11e-18	down	1747	SPS1	Solanesyl diphosphate synthase 1 [Source:UniProtKB/Swiss-Prot;Acc:Q8S948]
AT1G22490	36.6071	21.3161	51.898	-1.28374	0.00132709	0.013272	down	1523		basic helix-loop-helix (bHLH) DNA-binding superfamily protein [Source:TAIR;Acc:AT1G22490]
AT3G04000	19.7186	1.57492	37.8623	-4.58741	8.37e-11	3.07e-09	down	1318	ChlADR2	NADPH-dependent aldehyde reductase 2, chloroplastic [Source:UniProtKB/Swiss-Prot;Acc:Q9SQR2]
AT5G37550	142.868	58.2838	227.452	-1.96439	0.000138526	0.00188304	down	1125		At5g37550 [Source:UniProtKB/TrEMBL;Acc:Q9FGI2]
AT4G18010	1491.55	685.947	2297.16	-1.74368	7.11e-25	7.87e-23	down	2571	IP5P2	Type I inositol polyphosphate 5-phosphatase 2 [Source:UniProtKB/Swiss-Prot;Acc:Q9FUR2]
AT3G25410	488.548	258.82	718.276	-1.47259	1.67e-14	8.63e-13	down	1915	BASS3	Probable sodium/metabolite cotransporter BASS3, chloroplastic [Source:UniProtKB/Swiss-Prot;Acc:Q8RXE8]
AT1G13090	585.155	454.322	715.989	-0.656222	0.000534628	0.00610321	down	1691	CYP71B28	Cytochrome P450 71B28 [Source:UniProtKB/Swiss-Prot;Acc:Q9SAE3]
AT4G25080	786.564	452.391	1120.74	-1.3088	0.000567062	0.00639466	down	1321	CHLM	magnesium-protoporphyrin IX methyltransferase [Source:TAIR;Acc:AT4G25080]
AT3G24430	223.972	93.3487	354.596	-1.92548	1.41e-18	1.01e-16	down	1939	HCF101	Fe-S cluster assembly factor HCF101, chloroplastic [Source:UniProtKB/Swiss-Prot;Acc:Q6STH5]
AT3G12780	1607.15	1117.37	2096.94	-0.908174	2.86e-08	7.67e-07	down	1819	PGK1	Phosphoglycerate kinase [Source:UniProtKB/TrEMBL;Acc:A0A178V5M8]
AT2G34460	157.39	49.4222	265.359	-2.42471	3.69e-22	3.42e-20	down	1146		Uncharacterized protein At2g34460, chloroplastic [Source:UniProtKB/Swiss-Prot;Acc:Q8H124]
AT3G13784	59.6254	8.6009	110.65	-3.68537	8.08e-07	1.71e-05	down	1824	CWINV5	Beta-fructofuranosidase, insoluble isoenzyme CWINV5 [Source:UniProtKB/Swiss-Prot;Acc:Q9LIB9]
AT2G28605	26.6741	2.70707	50.6412	-4.22551	3.88e-13	1.79e-11	down	956	PPD2	PsbP domain-containing protein 2, chloroplastic [Source:UniProtKB/Swiss-Prot;Acc:Q8VY52]
AT5G38510	77.8918	45.0201	110.764	-1.29884	1.47e-05	0.00024727	down	1640	RBL9	RHOMBOID-like protein 9, chloroplastic [Source:UniProtKB/Swiss-Prot;Acc:Q9FFX0]
AT1G78450	159.667	0	319.334	#NAME?	1e-85	1.32e-82	down	954		F3F9.4 [Source:UniProtKB/TrEMBL;Acc:Q9SYN6]
AT3G56940	405.988	24.2723	787.703	-5.02027	1.04e-95	1.63e-92	down	1454	CRD1	Magnesium-protoporphyrin IX monomethyl ester [oxidative] cyclase, chloroplastic [Source:UniProtKB/Swiss-Prot;Acc:Q9M591]
AT1G30840	1074.77	731.793	1417.75	-0.954091	0.000169312	0.00225257	down	1529	PUP4	Probable purine permease 4 [Source:UniProtKB/Swiss-Prot;Acc:Q9SY29]
AT5G15210	109.886	77.6798	142.093	-0.871219	0.000768212	0.00839052	down	1743	ZHD8	Zinc-finger homeodomain protein 8 [Source:UniProtKB/Swiss-Prot;Acc:Q9LXG0]
AT4G00500	648.433	523.508	773.357	-0.562923	0.00117216	0.0120254	down	1887		Alpha/beta-Hydrolases superfamily protein [Source:UniProtKB/TrEMBL;Acc:Q8W495]
AT1G35680	478.134	274.013	682.255	-1.31607	2.62e-12	1.12e-10	down	939	RPL21	50S ribosomal protein L21, chloroplastic [Source:UniProtKB/Swiss-Prot;Acc:P51412]
AT1G32080	21.0779	0.994611	41.1613	-5.37101	0.00343095	0.0298495	down	2009	PLGG1	Plastidal glycolate/glycerate translocator 1, chloroplastic [Source:UniProtKB/Swiss-Prot;Acc:Q9FVQ4]
AT5G07990	1681.13	5.73675	3356.53	-9.19252	5.58e-34	1.01e-31	down	1929	CYP75B1	TT7 [Source:UniProtKB/TrEMBL;Acc:A0A178UNZ9]
AT4G37150	412.768	93.8065	731.729	-2.96355	4.39e-10	1.51e-08	down	1107	MES9	MES9 [Source:UniProtKB/TrEMBL;Acc:A0A178V387]
AT3G15840	26.0005	0.331537	51.6696	-7.284	1.19e-11	4.77e-10	down	1079	PIFI	Post-illumination chlorophyll fluorescence increase [Source:UniProtKB/TrEMBL;Acc:Q9LVZ5]
AT1G12740	1525.49	957.093	2093.88	-1.12945	0.000975798	0.0103016	down	1951	CYP87A2	Cytochrome P450, family 87, subfamily A, polypeptide 2 [Source:UniProtKB/TrEMBL;Acc:Q9LN73]
AT1G11210	432.662	322.88	542.445	-0.748479	0.0014049	0.0139221	down	1222		At1g11210/T28P6_5 [Source:UniProtKB/TrEMBL;Acc:Q9SXA7]
AT1G15820	175.911	24.3012	327.521	-3.75249	6.2e-26	7.46e-24	down	1204	LHCB6	Chlorophyll a-b binding protein, chloroplastic [Source:UniProtKB/TrEMBL;Acc:Q9LMQ2]
AT4G35440	153.618	50.1409	257.095	-2.35824	3e-05	0.00047607	down	2611	CLC-E	Chloride channel protein [Source:UniProtKB/TrEMBL;Acc:F4JN11]
AT3G48350	713.605	341.355	1085.86	-1.66949	3.34e-15	1.83e-13	down	1237	CEP3	KDEL-tailed cysteine endopeptidase CEP3 [Source:UniProtKB/Swiss-Prot;Acc:Q9STL5]
AT1G02280	575.933	384.469	767.397	-0.997108	3.52e-08	9.28e-07	down	1192	TOC33	Translocase of chloroplast 33, chloroplastic [Source:UniProtKB/Swiss-Prot;Acc:O23680]
AT5G46420	685.429	537.231	833.626	-0.633858	0.000362641	0.00439883	down	2692		16S rRNA processing protein RimM family [Source:UniProtKB/TrEMBL;Acc:Q9FHG3]
AT2G25450	9726.51	5873.95	13579.1	-1.20898	7.25e-15	3.9e-13	down	1604	GSL-OH	Probable 2-oxoacid dependent dioxygenase [Source:UniProtKB/Swiss-Prot;Acc:Q9SKK4]
AT1G06690	271.246	73.79	468.703	-2.66717	7.49e-25	8.25e-23	down	1607		Uncharacterized oxidoreductase At1g06690, chloroplastic [Source:UniProtKB/Swiss-Prot;Acc:Q94A68]
AT1G79700	286.787	229.119	344.455	-0.588218	0.00382768	0.0326083	down	1086		Integrase-type DNA-binding superfamily protein [Source:UniProtKB/TrEMBL;Acc:A8MQS2]
AT3G53130	121.44	19.3371	223.543	-3.53111	5.23e-16	3.06e-14	down	3355	CYP97C1	Carotene epsilon-monooxygenase, chloroplastic [Source:UniProtKB/Swiss-Prot;Acc:Q6TBX7]
AT1G74070	84.4593	41.8885	127.03	-1.60054	5.83e-08	1.48e-06	down	1659	CYP26-2	Peptidyl-prolyl cis-trans isomerase CYP26-2, chloroplastic [Source:UniProtKB/Swiss-Prot;Acc:F4HTT6]
AT3G19290	905.221	684.814	1125.63	-0.716945	0.00584435	0.0465537	down	1801	ABF4	ABRE binding factor 4 [Source:UniProtKB/TrEMBL;Acc:F4JB53]
AT4G31730	1456.37	1157.56	1755.17	-0.60053	0.000200002	0.00260273	down	1063	GDU1	Protein GLUTAMINE DUMPER 1 [Source:UniProtKB/Swiss-Prot;Acc:O81775]
AT2G35410	326.028	201.427	450.628	-1.16168	4.15e-08	1.08e-06	down	1172		Putative chloroplast RNA binding protein [Source:UniProtKB/TrEMBL;Acc:O82299]
AT2G36145	33.0381	3.29671	62.7795	-4.2512	1.12e-15	6.41e-14	down	740		Expressed protein [Source:UniProtKB/TrEMBL;Acc:Q8VXY0]
AT1G68890	448.47	213.26	683.679	-1.6807	4.12e-19	3.09e-17	down	4905	PHYLLO	Protein PHYLLO, chloroplastic [Source:UniProtKB/Swiss-Prot;Acc:Q15KI9]
AT4G32410	18904.1	14944.8	22863.4	-0.613398	8.2e-05	0.00118222	down	4221	CESA1	Cellulose synthase A catalytic subunit 1 [UDP-forming] [Source:UniProtKB/Swiss-Prot;Acc:O48946]
AT2G02410	312.995	171.181	454.809	-1.40973	2.66e-12	1.14e-10	down	1321		unknown protein; CONTAINS InterPro DOMAIN/s: Protein of unknown function DUF901 (InterPro:IPR010298); Ha. [Source:TAIR;Acc:AT2G02410]
AT4G05780	6.69081	0	13.3816	#NAME?	0.00038732	0.00465529	down	567
AT4G19530	60.993	26.5116	95.4743	-1.84849	1.61e-07	3.78e-06	down	3947		disease resistance protein (TIR-NBS-LRR class) family [Source:TAIR;Acc:AT4G19530]
AT5G53500	1077.77	832.418	1323.11	-0.668555	5.59e-05	0.000839345	down	3187		Similarity to unknown protein [Source:UniProtKB/TrEMBL;Acc:Q9FJD3]
AT1G32120	31.2755	15.7182	46.8329	-1.57509	0.000582995	0.00654776	down	3886		FUNCTIONS IN: molecular_function unknown; INVOLVED IN: biological_process unknown; LOCATED IN: membrane; EXPRESSED IN: 14 plant structures; EXPRESSED DURING: 4 anthesis, C globular stage, F mature embryo stage, petal differentiation and expansion st /.../ expanded cotyledon stage; CONTAINS InterPro DOMAIN/s: Aminotransferase-like, plant mobile domain (InterPro:IPR019557), Protein of unknown funct…
AT3G23510	1367.59	573.699	2161.48	-1.91365	4.56e-08	1.17e-06	down	3191		Cyclopropane-fatty-acyl-phospholipid synthase [Source:UniProtKB/TrEMBL;Acc:Q8GZ28]
AT1G17100	166.735	26.5757	306.894	-3.52956	1.42e-26	1.78e-24	down	941		HBP1 [Source:UniProtKB/TrEMBL;Acc:A0A178W6J0]
AT1G66910	7.73379	0.708921	14.7587	-4.37979	6.82e-05	0.00100874	down	2001	LRK10L-2.5	LEAF RUST 10 DISEASE-RESISTANCE LOCUS RECEPTOR-LIKE PROTEIN KINASE-like 2.5 [Source:UniProtKB/Swiss-Prot;Acc:F4HQ20]
AT1G64510	389.051	183.657	594.446	-1.69453	4.99e-18	3.42e-16	down	892		Translation elongation factor EF1B/ribosomal protein S6 family protein [Source:TAIR;Acc:AT1G64510]
AT3G15110	117.236	85.6019	148.87	-0.798343	0.00205816	0.019404	down	1036		At3g15110 [Source:UniProtKB/TrEMBL;Acc:Q2HIU0]
AT3G01795	152.465	110.539	194.39	-0.814401	0.000666434	0.00738213	down	262
AT5G22800	280.374	194.581	366.167	-0.912129	7.35e-06	0.000131003	down	3510	EMB86	Alanyl-tRNA synthetase, class IIc [Source:TAIR;Acc:AT5G22800]
AT1G78590	285.391	226.627	344.155	-0.602737	0.00294277	0.0261938	down	1516	NADK3	NAD(H) kinase 3 [Source:TAIR;Acc:AT1G78590]
AT3G56080	243.263	98.2993	388.227	-1.98165	0.00202919	0.0191669	down	2182		Probable methyltransferase PMT22 [Source:UniProtKB/Swiss-Prot;Acc:Q9LYN3]
AT2G26690	487.95	194.723	781.178	-2.00423	5.81e-07	1.26e-05	down	2025	NPF6.2	Protein NRT1/ PTR FAMILY 6.2 [Source:UniProtKB/Swiss-Prot;Acc:Q9SZY4]
AT2G23120	2922.1	2296.8	3547.41	-0.627142	0.000160386	0.00214638	down	793		Expressed protein [Source:UniProtKB/TrEMBL;Acc:Q8S8R1]
AT5G17810	35.569	15.4719	55.6662	-1.84715	1.56e-05	0.000262255	down	1153	WOX12	WUSCHEL-related homeobox 12 [Source:UniProtKB/Swiss-Prot;Acc:Q8GY25]
AT5G22640	1722.94	1187.94	2257.93	-0.926537	1.74e-08	4.8e-07	down	2885	TIC100	Protein TIC 100 [Source:UniProtKB/Swiss-Prot;Acc:Q8LPR8]
AT5G08050	381.085	8.50793	753.663	-6.46897	2.8e-41	6.94e-39	down	925		Wiskott-aldrich syndrome family protein, putative (DUF1118) [Source:UniProtKB/TrEMBL;Acc:Q9SD79]
AT4G35090	7606.36	6387.87	8824.85	-0.466237	0.00297986	0.0264393	down	2416	CAT2	catalase 2 [Source:TAIR;Acc:AT4G35090]
AT4G11110	1466.61	1162.42	1770.81	-0.607279	0.0002162	0.00278598	down	3964	SPA2	Protein SPA1-RELATED 2 [Source:UniProtKB/Swiss-Prot;Acc:Q9T014]
AT4G16690	31.3895	8.18659	54.5924	-2.73737	0.000204474	0.00265265	down	1456	PPD	Probable pheophorbidase [Source:UniProtKB/Swiss-Prot;Acc:O23512]
AT5G02830	136.517	99.7587	173.275	-0.796551	0.000793863	0.00862184	down	2855		Pentatricopeptide repeat-containing protein At5g02830, chloroplastic [Source:UniProtKB/Swiss-Prot;Acc:Q8GYL7]
AT4G17870	2530.34	2112.68	2948	-0.480665	0.0029626	0.0263328	down	1289	PYR1	Abscisic acid receptor PYR1 [Source:UniProtKB/Swiss-Prot;Acc:O49686]
AT1G17220	1059.69	349.608	1769.77	-2.33975	2.26e-27	2.96e-25	down	3792	FUG1	Translation initiation factor IF-2, chloroplastic [Source:UniProtKB/Swiss-Prot;Acc:Q9SHI1]
AT5G02160	151.676	11.9069	291.444	-4.61335	5.94e-09	1.74e-07	down	993		AT5g02160 [Source:UniProtKB/TrEMBL;Acc:Q9FPH2]
AT4G22890	451.422	303.004	599.84	-0.985239	1e-07	2.44e-06	down	1417	PGRL1A	PGR5-LIKE A [Source:UniProtKB/TrEMBL;Acc:A0A178UU76]
AT1G01420	181.117	37.9924	324.242	-3.09329	7.13e-35	1.35e-32	down	1666	UGT72B3	UDP-glucosyl transferase 72B3 [Source:TAIR;Acc:AT1G01420]
AT1G60260	137.5	1.74938	273.25	-7.28724	6.83e-70	4.75e-67	down	1634	BGLU5	beta glucosidase 5 [Source:TAIR;Acc:AT1G60260]
AT2G34850	99.1569	72.0004	126.313	-0.810931	0.00294917	0.0262279	down	1470	MEE25	NAD(P)-binding Rossmann-fold superfamily protein [Source:TAIR;Acc:AT2G34850]
AT4G16860	130.364	49.004	211.723	-2.11121	3.72e-16	2.21e-14	down	3559	RPP4	Disease resistance protein RPP4 [Source:UniProtKB/Swiss-Prot;Acc:F4JNA9]
AT2G47800	4618.84	3799.02	5438.66	-0.517624	0.0009664	0.0102256	down	5061	ABCC4	ABC transporter C family member 4 [Source:UniProtKB/Swiss-Prot;Acc:Q7DM58]
AT5G20860	541.726	402.148	681.304	-0.760572	2.34e-05	0.000380123	down	1732		Plant invertase/pectin methylesterase inhibitor superfamily [Source:TAIR;Acc:AT5G20860]
AT4G02530	230.689	122.921	338.458	-1.46125	9.34e-12	3.79e-10	down	935		chloroplast thylakoid lumen protein [Source:TAIR;Acc:AT4G02530]
AT3G05800	252.024	190.568	313.48	-0.718067	0.000386704	0.00465011	down	1215	BHLH150	Transcription factor bHLH150 [Source:UniProtKB/Swiss-Prot;Acc:Q9M9L6]
AT5G08710	589.678	330.481	848.876	-1.36099	4.42e-14	2.21e-12	down	1893		RUG1 [Source:UniProtKB/TrEMBL;Acc:A0A178UAH3]
AT4G26850	1267.58	357.545	2177.62	-2.60656	8.27e-25	9.08e-23	down	2191	VTC2	GDP-L-galactose phosphorylase 1 [Source:UniProtKB/Swiss-Prot;Acc:Q8RWE8]
AT3G21510	3261.56	2523.62	3999.49	-0.664318	5.62e-05	0.000843231	down	1437	AHP1	AHP1 [Source:UniProtKB/TrEMBL;Acc:A0A178V856]
AT3G55250	153.138	97.8163	208.459	-1.09161	2.16e-05	0.000354053	down	1430	PSA3	PDE329 [Source:UniProtKB/TrEMBL;Acc:A0A178VJJ9]
AT4G04630	184.842	98.4551	271.229	-1.46197	3.78e-07	8.55e-06	down	1138		Putative uncharacterized protein [Source:UniProtKB/TrEMBL;Acc:Q8LFI5]
AT1G08570	2764.55	1810.56	3718.55	-1.03831	0.00269414	0.0243798	down	1411	ACHT4	Thioredoxin-like 1-1, chloroplastic [Source:UniProtKB/Swiss-Prot;Acc:O64654]
AT3G22150	89.4803	52.516	126.445	-1.26768	0.00255178	0.0232769	down	3069	PCMP-E95	Tetratricopeptide repeat (TPR)-like superfamily protein [Source:UniProtKB/TrEMBL;Acc:A0A178VER0]
AT5G09225	412.891	290.437	535.345	-0.882243	0.000445891	0.00524185	down	780		Transmembrane protein [Source:UniProtKB/TrEMBL;Acc:Q8GYQ7]
AT3G06470	365.384	282.663	448.105	-0.664754	0.000448823	0.00526793	down	1600		F24P17.3 protein [Source:UniProtKB/TrEMBL;Acc:Q9SQV0]
AT2G14880	326.369	232.055	420.683	-0.858265	1.82e-05	0.00030174	down	1072		Expressed protein [Source:UniProtKB/TrEMBL;Acc:O82326]
AT1G50280	15.5822	5.0826	26.0818	-2.3594	0.000206767	0.00267822	down	1849		BTB/POZ domain-containing protein At1g50280 [Source:UniProtKB/Swiss-Prot;Acc:Q8RXR6]
AT1G57770	60.8722	3.68342	118.061	-5.00234	7.48e-30	1.11e-27	down	2048		FAD/NAD(P)-binding oxidoreductase family protein [Source:UniProtKB/TrEMBL;Acc:Q9FVR9]
AT1G20650	462.726	352.714	572.739	-0.699378	0.0047619	0.0390507	down	2310	PBL21	ASG5 [Source:UniProtKB/TrEMBL;Acc:A0A178W8H8]
AT1G73060	436.878	333.497	540.258	-0.695974	0.000211191	0.00272565	down	1437	LPA3	Protein LOW PSII ACCUMULATION 3, chloroplastic [Source:UniProtKB/Swiss-Prot;Acc:Q8H0W0]
AT5G06220	789.08	410.579	1167.58	-1.50779	1.16e-17	7.73e-16	down	2936		LETM1-like protein [Source:UniProtKB/TrEMBL;Acc:F4K2D7]
AT3G49320	241.598	189.457	293.739	-0.632665	0.00231506	0.021446	down	1379		Metal-dependent protein hydrolase [Source:UniProtKB/TrEMBL;Acc:Q9SG17]
AT4G30950	1244.94	816.182	1673.7	-1.03608	7.19e-10	2.39e-08	down	1823	FAD6	SFD4 [Source:UniProtKB/TrEMBL;Acc:A0A178V0M7]
AT2G37900	14.9733	6.17911	23.7676	-1.94352	0.00268096	0.0242869	down	2362	NPF5.6	Protein NRT1/ PTR FAMILY 5.6 [Source:UniProtKB/Swiss-Prot;Acc:P0CI03]
AT1G26230	37.3201	18.8302	55.8099	-1.56747	0.000103372	0.001455	down	1787	CPN60B4	Cpn60beta4 [Source:UniProtKB/TrEMBL;Acc:A0A178WH16]
AT5G44600	98.0451	60.813	135.277	-1.15347	3.04e-05	0.000482195	down	1274		S-adenosyl-L-methionine-dependent methyltransferases superfamily protein [Source:UniProtKB/TrEMBL;Acc:F4KAB4]
AT5G53580	339.053	133.705	544.402	-2.02562	5e-08	1.28e-06	down	1470	PLR1	Pyridoxal reductase, chloroplastic [Source:UniProtKB/Swiss-Prot;Acc:Q56Y42]
AT4G31270	129.199	98.5103	159.887	-0.698707	0.00550654	0.0443288	down	1080		At4g31270 [Source:UniProtKB/TrEMBL;Acc:Q8GWR8]
AT1G77330	6940.91	4105.28	9776.53	-1.25184	6.71e-05	0.000993664	down	1384		1-aminocyclopropane-1-carboxylate oxidase 5 [Source:UniProtKB/Swiss-Prot;Acc:Q0WPW4]
AT2G42750	493.936	385.572	602.3	-0.64348	0.000576394	0.00648527	down	1483		At2g42750/F7D19.25 [Source:UniProtKB/TrEMBL;Acc:Q9SJI1]
AT4G34610	517.525	255.26	779.789	-1.61112	1.7e-18	1.2e-16	down	2329	BLH6	BEL1-like homeodomain protein 6 [Source:UniProtKB/Swiss-Prot;Acc:O65685]
AT3G28100	248.143	169.728	326.557	-0.944107	7.68e-06	0.000136602	down	1761		WAT1-related protein At3g28100 [Source:UniProtKB/Swiss-Prot;Acc:Q9LRS5]
AT5G12110	318.531	248.602	388.46	-0.643927	0.00229245	0.0212681	down	1866		At5g12110 [Source:UniProtKB/TrEMBL;Acc:Q29PY2]
AT3G15190	184.267	126.613	241.921	-0.934109	3.56e-05	0.000555629	down	1007	RPS20	PRPS20 [Source:UniProtKB/TrEMBL;Acc:A0A178VMN1]
AT2G33060	302.253	161.51	442.996	-1.45567	2.42e-07	5.59e-06	down	2779	AtRLP27	Receptor like protein 27 [Source:UniProtKB/Swiss-Prot;Acc:F4IUU1]
AT1G07440	16.9183	1.01287	32.8238	-5.01822	2.48e-10	8.68e-09	down	965		Tropinone reductase homolog At1g07440 [Source:UniProtKB/Swiss-Prot;Acc:P0DKI3]
AT1G73290	171.907	105.559	238.255	-1.17446	4.7e-07	1.05e-05	down	1711	SCPL5	Serine carboxypeptidase-like 5 [Source:UniProtKB/Swiss-Prot;Acc:Q9CAU2]
AT4G24930	57.3101	18.2045	96.4157	-2.40498	1.01e-11	4.07e-10	down	1104		Thylakoid lumenal 17.9 kDa protein, chloroplastic [Source:UniProtKB/Swiss-Prot;Acc:Q9SW33]
AT4G33500	276.391	215.599	337.183	-0.645178	0.00134777	0.0134412	down	2526		Probable protein phosphatase 2C 62 [Source:UniProtKB/Swiss-Prot;Acc:Q93V88]
AT3G04550	92.7926	46.6565	138.929	-1.57419	2.04e-08	5.54e-07	down	1518	RAF1.2	Rubisco accumulation factor 1.2, chloroplastic [Source:UniProtKB/Swiss-Prot;Acc:Q9SR19]
AT2G33800	697.147	431.933	962.361	-1.15577	6.91e-07	1.49e-05	down	1309	RPS5	30S ribosomal protein S5, chloroplastic [Source:UniProtKB/Swiss-Prot;Acc:P93014]
AT3G09520	15.6025	1.66661	29.5385	-4.14761	0.000878254	0.00941977	down	2372	ATEXO70H4	Exocyst subunit Exo70 family protein [Source:UniProtKB/TrEMBL;Acc:Q9SF51]
AT2G36350	591.527	489.344	693.711	-0.503484	0.00584907	0.0465617	down	3414	KIPK2	Serine/threonine-protein kinase KIPK2 [Source:UniProtKB/Swiss-Prot;Acc:Q9SJM3]
AT2G05440	63368.6	37568.2	89169	-1.24703	7.25e-16	4.19e-14	down	675	ATGRP9	Glycine-rich protein 9 [Source:UniProtKB/TrEMBL;Acc:Q9SL23]
AT1G10370	652.565	53.2694	1251.86	-4.55462	4.92e-12	2.04e-10	down	1160	GSTU17	Glutathione S-transferase U17 [Source:UniProtKB/Swiss-Prot;Acc:Q9FUS8]
AT2G42620	961.948	626.303	1297.59	-1.0509	0.00502577	0.0409594	down	2400	MAX2	F-box protein MAX2 [Source:UniProtKB/Swiss-Prot;Acc:Q9SIM9]
AT4G39620	234.338	172.132	296.544	-0.784732	0.000257802	0.00327649	down	1709	EMB2453	Pentatricopeptide repeat-containing protein At4g39620, chloroplastic [Source:UniProtKB/Swiss-Prot;Acc:Q9SV96]
AT2G29360	14.6039	1.4361	27.7717	-4.27339	3.56e-08	9.37e-07	down	1076	SDR	Tropinone reductase homolog At2g29360 [Source:UniProtKB/Swiss-Prot;Acc:Q9ZW19]
AT5G11110	1381.59	1082.41	1680.78	-0.634886	0.00115321	0.0118797	down	3629	SPS2	Glycosyltransferase (Fragment) [Source:UniProtKB/TrEMBL;Acc:W8QNB0]
AT1G61890	1876.59	1553.79	2199.4	-0.501319	0.00214154	0.0200464	down	2199	DTX37	Protein DETOXIFICATION 37 [Source:UniProtKB/Swiss-Prot;Acc:O80695]
AT4G17560	404.046	223.525	584.568	-1.38693	1.81e-09	5.72e-08	down	1228		50S ribosomal protein L19-1, chloroplastic [Source:UniProtKB/Swiss-Prot;Acc:Q8W463]
AT1G28150	217.926	159.659	276.194	-0.790689	0.0056111	0.0450545	down	1065		UPF0426 protein At1g28150, chloroplastic [Source:UniProtKB/Swiss-Prot;Acc:Q9FZ89]
AT5G23000	154.622	85.6345	223.609	-1.38472	1.5e-06	3.02e-05	down	1399	RAX1	Transcription factor RAX1 [Source:UniProtKB/Swiss-Prot;Acc:Q9FG68]
AT1G05690	59.925	38.6665	81.1836	-1.0701	0.0012276	0.0124816	down	1948	BT3	BTB/POZ and TAZ domain-containing protein 3 [Source:UniProtKB/Swiss-Prot;Acc:Q9SYL0]
AT4G24810	142.336	83.1292	201.542	-1.27766	1.37e-07	3.27e-06	down	1962		Protein kinase superfamily protein [Source:UniProtKB/TrEMBL;Acc:F4JRQ4]
AT2G31890	123.241	81.426	165.055	-1.01938	4.53e-05	0.000693627	down	2781	RAP	RAP domain-containing protein, chloroplastic [Source:UniProtKB/Swiss-Prot;Acc:Q8VZE7]
AT2G34620	35.5276	1.372	69.6831	-5.66646	6.69e-17	4.15e-15	down	1204		Mitochondrial transcription termination factor family protein [Source:UniProtKB/TrEMBL;Acc:O64685]
AT3G05880	6523.93	4950.01	8097.84	-0.710105	0.000327931	0.00403851	down	879	RCI2A	RCI2A [Source:UniProtKB/TrEMBL;Acc:A0A178V7D5]
AT4G12490	8.23797	0	16.4759	#NAME?	5.27e-07	1.16e-05	down	786		pEARLI1-like lipid transfer protein 2 [Source:UniProtKB/Swiss-Prot;Acc:Q9SU34]
AT3G43600	2217.32	1672.29	2762.35	-0.724077	5.07e-06	9.34e-05	down	5082	AAO2	Indole-3-acetaldehyde oxidase [Source:UniProtKB/Swiss-Prot;Acc:Q7G192]
AT2G04790	19.0373	3.22327	34.8514	-3.43462	0.000195927	0.00255502	down	906		unknown protein; Ha. [Source:TAIR;Acc:AT2G04790]
AT3G04450	92.6427	67.4981	117.787	-0.803267	0.00419357	0.0350918	down	1721	PHL13	Myb family transcription factor PHL13 [Source:UniProtKB/Swiss-Prot;Acc:F4J3P7]
AT1G32550	73.9404	45.5155	102.365	-1.1693	0.000109461	0.00152611	down	828	FdC1	2Fe-2S ferredoxin-like superfamily protein [Source:UniProtKB/TrEMBL;Acc:F4IE99]
AT4G09760	466.048	321.442	610.654	-0.925798	2.69e-05	0.000430455	down	1260		Probable choline kinase 3 [Source:UniProtKB/Swiss-Prot;Acc:Q9SZ92]
AT1G78970	142.344	16.593	268.095	-4.0141	2.39e-32	3.93e-30	down	2781	LUP1	Lupeol synthase 1 [Source:UniProtKB/Swiss-Prot;Acc:Q9C5M3]
AT5G55120	1162.51	980.155	1344.86	-0.456371	0.0044815	0.037104	down	1962	VTC5	VTC5 [Source:UniProtKB/TrEMBL;Acc:A0A178UIM1]
AT3G05410	120.691	81.9469	159.434	-0.960202	0.000203222	0.00263914	down	815	PPD7	PsbP domain-containing protein 7, chloroplastic [Source:UniProtKB/Swiss-Prot;Acc:F4J7A7]
AT5G54290	225.966	156.808	295.124	-0.912323	2.04e-05	0.000335665	down	1206	CcdA	Cytochrome c biogenesis protein family [Source:UniProtKB/TrEMBL;Acc:F4K0A8]
AT5G08640	8739.9	144.468	17335.3	-6.90682	4.72e-27	6.05e-25	down	1418	FLS1	Flavonol synthase/flavanone 3-hydroxylase [Source:UniProtKB/Swiss-Prot;Acc:Q96330]
AT1G68830	363.506	218.99	508.022	-1.21402	4.44e-10	1.52e-08	down	2120	STN7	Serine/threonine-protein kinase STN7, chloroplastic [Source:UniProtKB/Swiss-Prot;Acc:Q9S713]
AT4G14550	550.432	440.316	660.549	-0.585127	0.000772345	0.00842472	down	1090	IAA14	indole-3-acetic acid inducible 14 [Source:TAIR;Acc:AT4G14550]
AT1G28580	3616.73	2787.77	4445.69	-0.673294	0.00052041	0.00595176	down	1743		GDSL esterase/lipase At1g28580 [Source:UniProtKB/Swiss-Prot;Acc:Q9FXJ2]
AT3G24770	538.633	444.964	632.303	-0.506926	0.0058971	0.0468844	down	1171	CLE41	CLAVATA3/ESR (CLE)-related protein 41 [Source:UniProtKB/Swiss-Prot;Acc:Q84W98]
AT2G21970	969.601	402.081	1537.12	-1.93467	1.15e-28	1.58e-26	down	907	2019-09-02	SEP2 [Source:UniProtKB/TrEMBL;Acc:A0A178VQ84]
AT1G13820	139.813	78.348	201.278	-1.36122	4.54e-08	1.17e-06	down	1461		Alpha/beta-Hydrolases superfamily protein [Source:UniProtKB/TrEMBL;Acc:Q6NL07]
AT1G11460	144.637	99.6123	189.661	-0.929031	0.00208485	0.0196112	down	1274		WAT1-related protein At1g11460 [Source:UniProtKB/Swiss-Prot;Acc:F4I8W6]
AT4G29060	1006	436.25	1575.75	-1.85281	1.94e-26	2.4e-24	down	3001	emb2726	Elongation factor Ts, mitochondrial [Source:UniProtKB/TrEMBL;Acc:Q9SZD6]
AT4G28080	456.604	287.75	625.458	-1.1201	2.7e-09	8.3e-08	down	6117	TSS	Protein TSS [Source:UniProtKB/Swiss-Prot;Acc:F4JKH6]
AT5G58660	148.523	104.477	192.568	-0.882188	0.000257703	0.00327649	down	1535		2-oxoglutarate (2OG) and Fe(II)-dependent oxygenase superfamily protein [Source:UniProtKB/TrEMBL;Acc:Q9LUZ1]
AT1G62780	70.7072	41.1948	100.22	-1.28263	1.94e-05	0.000319972	down	1047		Dimethylallyl, adenosine tRNA methylthiotransferase [Source:UniProtKB/TrEMBL;Acc:Q8VY70]
AT2G04230	95.6599	66.5374	124.782	-0.907179	0.000784572	0.00854691	down	1999		F-box/FBD/LRR-repeat protein At2g04230 [Source:UniProtKB/Swiss-Prot;Acc:Q6NKX3]
AT5G03190	435.758	174.408	697.108	-1.99892	1.13e-24	1.21e-22	down	1918	CPUORF47	Peptide upstream protein [Source:UniProtKB/TrEMBL;Acc:A8MQH8]
AT5G38410	160.913	2.69814	319.129	-6.88603	2.5e-09	7.74e-08	down	1119		Ribulose bisphosphate carboxylase small chain [Source:UniProtKB/TrEMBL;Acc:B3H5S2]
AT4G37925	8.42438	0	16.8488	#NAME?	3.89e-07	8.76e-06	down	1003	NDHM	NAD(P)H-quinone oxidoreductase subunit M, chloroplastic [Source:UniProtKB/Swiss-Prot;Acc:Q2V2S7]
AT4G37920	230.473	134.257	326.689	-1.28293	2.85e-09	8.75e-08	down	1693		Uncharacterized protein At4g37920 [Source:UniProtKB/Swiss-Prot;Acc:Q84WN0]
AT1G08380	171.57	8.84879	334.292	-5.23948	2.39e-64	1.49e-61	down	819	PSAO	PSAO [Source:UniProtKB/TrEMBL;Acc:A0A178W5Y5]
AT3G61080	38.6981	17.237	60.1592	-1.80327	7.72e-06	0.000137004	down	1308		Protein kinase superfamily protein [Source:UniProtKB/TrEMBL;Acc:A0A1I9LR17]
AT5G52310	677.953	192.758	1163.15	-2.59317	3.05e-09	9.33e-08	down	2663	RD29A	Low-temperature-induced 78 kDa protein [Source:UniProtKB/Swiss-Prot;Acc:Q06738]
AT1G44000	219.58	152.072	287.088	-0.916742	1.52e-05	0.000255648	down	1172	SGRL	Protein STAY-GREEN LIKE, chloroplastic [Source:UniProtKB/Swiss-Prot;Acc:Q94AQ9]
AT5G25630	544.126	249.777	838.476	-1.74713	1.59e-06	3.19e-05	down	2219		Tetratricopeptide repeat (TPR)-like superfamily protein [Source:UniProtKB/TrEMBL;Acc:F4JY71]
AT5G44650	313.185	162.355	464.015	-1.51502	9.69e-14	4.69e-12	down	1232	Y3IP1	Ycf3-interacting protein 1, chloroplastic [Source:UniProtKB/Swiss-Prot;Acc:Q9LU01]
AT3G01210	317.835	207.248	428.422	-1.04768	1.19e-07	2.87e-06	down	1135		RNA-binding (RRM/RBD/RNP motifs) family protein [Source:UniProtKB/TrEMBL;Acc:Q9MAD0]
AT5G58780	99.3117	48.5617	150.062	-1.62767	1.49e-06	3e-05	down	1095		Dehydrodolichyl diphosphate synthase 3 [Source:UniProtKB/Swiss-Prot;Acc:Q8RX73]
AT5G57960	245.135	195.831	294.44	-0.588366	0.00498285	0.0406494	down	2221		GTP binding protein-like [Source:UniProtKB/TrEMBL;Acc:Q9FJM0]
AT1G49990	11.2475	2.28384	20.2112	-3.14562	0.000103674	0.00145843	down	1476		F-box protein At1g49990 [Source:UniProtKB/Swiss-Prot;Acc:Q9LPM2]
AT3G20370	10385.8	7643.63	13128	-0.780319	0.00170393	0.0164806	down	1525		AT3g20370/MQC12_13 [Source:UniProtKB/TrEMBL;Acc:Q9LTQ5]
AT4G37680	1116.25	938.491	1294	-0.463426	0.0051684	0.0419034	down	1870	HHP4	heptahelical protein 4 [Source:TAIR;Acc:AT4G37680]
AT5G04830	2516.97	1744.27	3289.67	-0.915319	7.97e-09	2.3e-07	down	1088		Nuclear transport factor 2 (NTF2) family protein [Source:UniProtKB/TrEMBL;Acc:Q9FMC7]
AT5G03435	174.105	121.661	226.549	-0.896951	4.73e-05	0.000720521	down	2432		Anthranilate phosphoribosyltransferase-like protein [Source:UniProtKB/TrEMBL;Acc:Q9LZE5]
AT2G21280	142.626	63.1307	222.121	-1.81493	2.12e-13	1e-11	down	1421	GC1	NAD(P)-binding Rossmann-fold superfamily protein [Source:TAIR;Acc:AT2G21280]
AT4G39100	1517	1190.92	1843.07	-0.630033	0.000207406	0.00268234	down	1536	SHL	SHL1 [Source:UniProtKB/TrEMBL;Acc:A0A178UWF3]
AT2G45450	109.313	77.3789	141.247	-0.868212	0.00322983	0.0283554	down	967	ZPR1	Protein LITTLE ZIPPER 1 [Source:UniProtKB/Swiss-Prot;Acc:F4IG60]
AT3G15090	1041.9	594.725	1489.07	-1.32412	5.23e-15	2.83e-13	down	1613		AT3g15090/K15M2_24 [Source:UniProtKB/TrEMBL;Acc:Q9LK96]
AT4G21940	30.484	15.8561	45.1119	-1.50847	0.000561838	0.00635007	down	2092	CPK15	Calcium-dependent protein kinase 15 [Source:UniProtKB/TrEMBL;Acc:F4JKC7]
AT2G34490	730.975	547.329	914.621	-0.740765	0.0035246	0.0304621	down	2051	CYP710A2	Cytochrome P450 710A2 [Source:UniProtKB/Swiss-Prot;Acc:O64698]
AT1G78460	171.036	14.4026	327.67	-4.50784	1.21e-18	8.74e-17	down	1050		AT1G78460 protein [Source:UniProtKB/TrEMBL;Acc:Q9SYN5]
AT5G65510	83.0822	51.5099	114.655	-1.15437	5.73e-05	0.000858069	down	1559	AIL7	AP2-like ethylene-responsive transcription factor AIL7 [Source:UniProtKB/Swiss-Prot;Acc:Q6J9N8]
AT1G55480	116.539	34.3289	198.749	-2.53345	6e-20	4.75e-18	down	1591	ZKT	Protein MET1, chloroplastic [Source:UniProtKB/Swiss-Prot;Acc:Q94BS2]
AT5G44190	154.01	103.866	204.154	-0.974928	0.000663038	0.00735428	down	1630	GLK2	Transcription activator GLK2 [Source:UniProtKB/Swiss-Prot;Acc:Q9FFH0]
AT5G13720	52.3123	23.9875	80.6371	-1.74916	8.5e-07	1.8e-05	down	1232		Uncharacterized protein At5g13720 [Source:UniProtKB/TrEMBL;Acc:Q9FNA1]
AT4G34240	450.13	275.272	624.987	-1.18297	0.00155273	0.0152361	down	1968	ALDH3I1	Aldehyde dehydrogenase [Source:UniProtKB/TrEMBL;Acc:A0A178UV01]
AT1G27940	6.07785	0.681332	11.4744	-4.07391	0.000690472	0.00761803	down	4047	ABCB13	PGP13 [Source:UniProtKB/TrEMBL;Acc:A0A178W4F4]
AT4G01660	1486.38	1067.42	1905.34	-0.83592	9.95e-06	0.000173193	down	2328	ABC1	Protein ABC transporter 1, mitochondrial [Source:UniProtKB/Swiss-Prot;Acc:Q9SBB2]
AT2G35500	188.576	139.706	237.446	-0.765202	0.00055113	0.00625732	down	2024	SKL2	Probable inactive shikimate kinase like 2, chloroplastic [Source:UniProtKB/Swiss-Prot;Acc:O82290]
AT3G29200	1552.48	1189.25	1915.71	-0.687823	0.00505429	0.041165	down	1966	CM1	Chorismate mutase 1, chloroplastic [Source:UniProtKB/Swiss-Prot;Acc:P42738]
AT1G12770	448.436	353.363	543.508	-0.621149	0.00105847	0.0110356	down	2382	RH47	DEAD-box ATP-dependent RNA helicase 47, mitochondrial [Source:UniProtKB/Swiss-Prot;Acc:Q8W4E1]
AT5G38780	26.7429	5.07455	48.4113	-3.25399	1.43e-09	4.58e-08	down	1528		Probable S-adenosylmethionine-dependent methyltransferase At5g38780 [Source:UniProtKB/Swiss-Prot;Acc:Q9FKR0]
AT4G38460	973.812	671.128	1276.5	-0.92753	5.4e-08	1.38e-06	down	1339	GGR	Heterodimeric geranylgeranyl pyrophosphate synthase small subunit, chloroplastic [Source:UniProtKB/Swiss-Prot;Acc:Q39108]
AT4G39730	2885.45	2031.46	3739.45	-0.880308	1.51e-08	4.2e-07	down	1009	PLAT1	PLAT1 [Source:UniProtKB/TrEMBL;Acc:A0A178V098]
AT3G12930	145.443	98.3839	192.501	-0.968374	0.000360777	0.00438047	down	1188	IJ	Protein Iojap, chloroplastic [Source:UniProtKB/Swiss-Prot;Acc:Q9LDY9]
AT1G55130	720.418	593.941	846.896	-0.511865	0.0028506	0.0255644	down	2218	TMN6	Transmembrane 9 superfamily member 6 [Source:UniProtKB/Swiss-Prot;Acc:Q9C720]
AT3G23700	232.123	68.5542	395.691	-2.52906	3.26e-07	7.45e-06	down	1586		AT3g23700/MYM9_3 [Source:UniProtKB/TrEMBL;Acc:Q9LK47]
AT5G64550	506.186	320.232	692.14	-1.11195	1.19e-09	3.85e-08	down	2533		Emb [Source:UniProtKB/TrEMBL;Acc:Q9FLG3]
AT1G06550	4049.49	2773.29	5325.68	-0.941365	2.13e-09	6.65e-08	down	1584		3-hydroxyisobutyryl-CoA hydrolase-like protein 5 [Source:UniProtKB/Swiss-Prot;Acc:Q9SHJ8]
AT5G26742	2501.32	1165.86	3836.77	-1.7185	1.27e-25	1.51e-23	down	2907	RH3	RH3 [Source:UniProtKB/TrEMBL;Acc:A0A178UT03]
AT5G58000	1558.71	1312.87	1804.55	-0.458918	0.00527935	0.0426785	down	1911		Reticulon-like protein [Source:UniProtKB/TrEMBL;Acc:A0A178UL80]
AT3G18680	274.373	153.294	395.451	-1.36719	6.2e-11	2.3e-09	down	1285		Amino acid kinase family protein [Source:UniProtKB/TrEMBL;Acc:A0A1I9LRT3]
AT5G11250	316.427	238.018	394.837	-0.73019	0.000180054	0.00237402	down	3948		Disease resistance protein (TIR-NBS-LRR class) [Source:UniProtKB/TrEMBL;Acc:Q9LFN1]
AT5G39410	1160.56	975.232	1345.9	-0.46475	0.00509391	0.0414338	down	2064		Probable mitochondrial saccharopine dehydrogenase-like oxidoreductase At5g39410 [Source:UniProtKB/Swiss-Prot;Acc:Q8LGI2]
AT4G28660	199.619	20.296	378.943	-4.22271	2.88e-19	2.18e-17	down	915	PSB28	Photosystem II reaction center Psb28 protein [Source:UniProtKB/TrEMBL;Acc:F4JM05]
AT2G26900	1337.55	951.881	1723.23	-0.856258	1.58e-07	3.73e-06	down	1906	BASS2	BASS2 [Source:UniProtKB/TrEMBL;Acc:A0A178VXV9]
AT1G73360	63.2612	38.1575	88.3649	-1.21151	0.000108121	0.00150911	down	3506	HDG11	Homeobox-leucine zipper protein HDG11 [Source:UniProtKB/Swiss-Prot;Acc:Q9FX31]
AT3G26570	283.985	70.0378	497.932	-2.82974	1.23e-26	1.55e-24	down	2422	PHT2;1	phosphate transporter 2;1 [Source:TAIR;Acc:AT3G26570]
AT1G35340	319.042	241.391	396.693	-0.71665	0.000262691	0.00333233	down	1297		ATP-dependent protease La (LON) domain protein [Source:UniProtKB/TrEMBL;Acc:Q682J5]
AT5G51545	131.759	83.4828	180.034	-1.10872	0.00338398	0.0295016	down	915	LPA2	Protein LOW PSII ACCUMULATION 2, chloroplastic [Source:UniProtKB/Swiss-Prot;Acc:F4KDA6]
AT1G77990	213.886	134.631	293.142	-1.12259	2.07e-07	4.84e-06	down	2335	SULTR2;2	Sulfate transporter 2.2 [Source:UniProtKB/Swiss-Prot;Acc:P92946]
AT1G55670	6.19424	0	12.3885	#NAME?	2.06e-05	0.000338963	down	780	PSAG	Photosystem I reaction center subunit V, chloroplastic [Source:UniProtKB/Swiss-Prot;Acc:Q9S7N7]
AT5G17050	1443.94	163.75	2724.12	-4.05622	6.98e-12	2.85e-10	down	1620	UGT78D2	Glycosyltransferase (Fragment) [Source:UniProtKB/TrEMBL;Acc:W8PUE7]
AT4G01580	37.5552	23.2586	51.8519	-1.15663	0.00340204	0.0296281	down	912		B3 domain-containing protein At4g01580 [Source:UniProtKB/Swiss-Prot;Acc:Q9ZSH7]
AT1G47530	3633.34	1115.19	6151.49	-2.46364	7.06e-24	7.24e-22	down	2089	DTX33	Protein DETOXIFICATION 33 [Source:UniProtKB/Swiss-Prot;Acc:Q9SX83]
AT3G46610	189.887	110.755	269.019	-1.28034	1.02e-08	2.91e-07	down	2424		Pentatricopeptide repeat-containing protein At3g46610 [Source:UniProtKB/Swiss-Prot;Acc:Q9SNB7]
AT1G53210	5966.39	4862.61	7070.16	-0.540011	0.000645928	0.00717086	down	2421	NCL	Sodium/calcium exchanger NCL [Source:UniProtKB/Swiss-Prot;Acc:Q8L636]
AT4G21510	80.8806	57.1389	104.622	-0.872645	0.00341444	0.0297258	down	1416	SKIP27	F-box protein SKIP27 [Source:UniProtKB/Swiss-Prot;Acc:O65416]
AT3G48420	52.1257	22.939	81.3124	-1.82567	4.77e-07	1.06e-05	down	1284	CBBY	CBBY-like protein [Source:UniProtKB/Swiss-Prot;Acc:Q94K71]
AT3G52380	387.525	267.643	507.407	-0.922834	9.95e-07	2.08e-05	down	1454	CP33	RNA-binding protein CP33, chloroplastic [Source:UniProtKB/Swiss-Prot;Acc:Q39061]
AT1G19720	221.294	76.6601	365.929	-2.25501	2.3e-23	2.28e-21	down	3069	DYW7	Pentatricopeptide repeat-containing protein At1g19720 [Source:UniProtKB/Swiss-Prot;Acc:Q9FXH1]
AT2G48070	237.201	177.572	296.83	-0.741232	0.000434009	0.00512774	down	913	RPH1	Resistance to phytophthora 1 [Source:UniProtKB/TrEMBL;Acc:F4IN59]
AT3G57540	578.845	403.558	754.132	-0.90204	0.00263158	0.0238828	down	1423	REM4.1	Remorin 4.1 [Source:UniProtKB/Swiss-Prot;Acc:Q93YN8]
AT1G30130	2295.33	1209.06	3381.59	-1.48382	1.25e-07	3.01e-06	down	1734		AT1G30130 protein [Source:UniProtKB/TrEMBL;Acc:Q9C6Z4]
AT5G50280	233.945	184.544	283.346	-0.618605	0.00375873	0.0320864	down	2677	EMB1006	Pentatricopeptide repeat-containing protein At5g50280, chloroplastic [Source:UniProtKB/Swiss-Prot;Acc:Q9FGR7]
AT1G68520	38.7977	3.45291	74.1424	-4.42441	0.00100497	0.0105614	down	2617	COL6	Zinc finger protein CONSTANS-LIKE 6 [Source:UniProtKB/Swiss-Prot;Acc:Q8LG76]
AT1G02813	6.62509	1.4361	11.8141	-3.04028	0.0034353	0.0298657	down	652		Protein of unknown function, DUF538 [Source:TAIR;Acc:AT1G02813]
AT1G29530	209.204	153.614	264.794	-0.785561	0.000371691	0.00449552	down	1240		At1g29530 [Source:UniProtKB/TrEMBL;Acc:Q6NL08]
AT1G60550	232.954	94.3146	371.593	-1.97817	8.52e-10	2.79e-08	down	1419	MENB	1,4-dihydroxy-2-naphthoyl-CoA synthase, peroxisomal [Source:UniProtKB/Swiss-Prot;Acc:Q8GYN9]
AT1G10090	1444.12	1065.86	1822.39	-0.773822	7.85e-05	0.00113981	down	2910		Hyperosmolality-gated Ca2+ permeable channel 2.2 [Source:UniProtKB/TrEMBL;Acc:A0A097NUS5]
AT1G16080	401.066	282.345	519.786	-0.880458	4.61e-06	8.53e-05	down	1340		Nuclear protein [Source:UniProtKB/TrEMBL;Acc:Q9S9M7]
AT3G47860	294.236	173.736	414.735	-1.25529	8.4e-10	2.76e-08	down	1322	CHL	CHL [Source:UniProtKB/TrEMBL;Acc:A0A178VKZ0]
AT5G02860	324.91	256.701	393.118	-0.614872	0.00124971	0.0126599	down	3049		Pentatricopeptide repeat-containing protein At5g02860 [Source:UniProtKB/Swiss-Prot;Acc:Q9LYZ9]
AT3G04760	118.648	31.3926	205.904	-2.71347	3.41e-12	1.44e-10	down	2411		Pentatricopeptide repeat-containing protein At3g04760, chloroplastic [Source:UniProtKB/Swiss-Prot;Acc:Q9SR00]
AT3G50820	410.441	39.0078	781.874	-4.3251	4.58e-33	7.84e-31	down	1327	PSBO2	Oxygen-evolving enhancer protein 1-2, chloroplastic [Source:UniProtKB/Swiss-Prot;Acc:Q9S841]
AT1G20490	496.455	400.571	592.34	-0.564366	0.00626329	0.0495281	down	2173		AMP-dependent synthetase and ligase family protein [Source:TAIR;Acc:AT1G20490]
AT1G74670	64.4545	13.5735	115.335	-3.08697	1.28e-17	8.39e-16	down	910	GASA6	Gibberellin-regulated protein 6 [Source:UniProtKB/Swiss-Prot;Acc:Q6NMQ7]
AT4G14760	1903.33	1513.18	2293.48	-0.599955	0.000183511	0.00241577	down	5564	NET1B	Protein NETWORKED 1B [Source:UniProtKB/Swiss-Prot;Acc:F4JIF4]
AT5G57180	140.063	43.8667	236.259	-2.42917	1.33e-07	3.19e-06	down	2332	CIA2	CIA2 [Source:UniProtKB/TrEMBL;Acc:A0A178UDY1]
AT5G56850	28.4989	3.47117	53.5266	-3.94676	4.24e-07	9.5e-06	down	1829		unknown protein; EXPRESSED IN: 21 plant structures; EXPRESSED DURING: 13 growth stages; Ha. [Source:TAIR;Acc:AT5G56850]
AT3G62740	2004.43	972.897	3035.97	-1.6418	5.11e-23	4.95e-21	down	1858	BGLU7	Beta-glucosidase 7 [Source:UniProtKB/Swiss-Prot;Acc:Q9LZJ1]
AT1G04420	171.274	107.13	235.419	-1.13586	1.09e-06	2.25e-05	down	1539		NAD(P)-linked oxidoreductase superfamily protein [Source:UniProtKB/TrEMBL;Acc:Q8VZ23]
AT5G44110	1619.79	580.883	2658.7	-2.1944	2.51e-07	5.79e-06	down	1151	ABCI21	ABC transporter I family member 21 [Source:UniProtKB/Swiss-Prot;Acc:Q9XF19]
AT1G30360	13392.1	8784.8	17999.4	-1.03486	3.32e-11	1.26e-09	down	2783	ERD4	Hyperosmolality-gated Ca2+ permeable channel 3.1 [Source:UniProtKB/TrEMBL;Acc:A0A097NUQ9]
AT1G67400	89.6132	52.139	127.087	-1.28539	9.39e-06	0.000164141	down	1554		ELMO/CED-12 family protein [Source:UniProtKB/TrEMBL;Acc:F4HRW0]
AT1G31800	351.891	74.1797	629.603	-3.08535	1.54e-47	4.89e-45	down	2070	CYP97A3	Protein LUTEIN DEFICIENT 5, chloroplastic [Source:UniProtKB/Swiss-Prot;Acc:Q93VK5]
AT1G68590	112.18	24.7151	199.646	-3.01398	2.08e-25	2.41e-23	down	837		30S ribosomal protein 3-1, chloroplastic [Source:UniProtKB/Swiss-Prot;Acc:Q9SX22]
AT3G20230	160.686	117.903	203.468	-0.787196	0.000831518	0.00896515	down	1018		AT3G20230 protein [Source:UniProtKB/TrEMBL;Acc:Q9LJX6]
AT2G19400	60.3561	40.6366	80.0757	-0.978585	0.00280539	0.0252768	down	2190		AGC (cAMP-dependent, cGMP-dependent and protein kinase C) kinase family protein [Source:UniProtKB/TrEMBL;Acc:O64573]
AT1G11790	645.565	519.149	771.981	-0.572416	0.00105444	0.0110019	down	1752	ADT1	Arogenate dehydratase [Source:UniProtKB/TrEMBL;Acc:A0A178W336]
AT2G42220	65.0277	7.94715	122.108	-3.94158	1.56e-24	1.66e-22	down	967	STR9	Rhodanese-like domain-containing protein 9, chloroplastic [Source:UniProtKB/Swiss-Prot;Acc:O48529]
AT3G03990	1641.22	971.112	2311.32	-1.25101	0.000668385	0.00740047	down	1659	D14	Strigolactone esterase D14 [Source:UniProtKB/Swiss-Prot;Acc:Q9SQR3]
AT1G08540	356.337	227.705	484.969	-1.09073	0.000361913	0.00439213	down	2049	SIGB	RNA polymerase sigma factor sigB [Source:UniProtKB/Swiss-Prot;Acc:O22056]
AT3G16650	103.891	68.5932	139.189	-1.02091	0.000599244	0.00670917	down	1887	PRL2	Protein pleiotropic regulator PRL2 [Source:UniProtKB/Swiss-Prot;Acc:Q39190]
AT1G66725	666.081	207.202	1124.96	-2.44077	7.65e-10	2.53e-08	down	331	MIR163	MIR163; miRNA [Source:TAIR;Acc:AT1G66725]
AT5G08540	722.847	549.774	895.921	-0.704534	7.96e-05	0.00115303	down	1435		Ribosomal RNA small subunit methyltransferase J [Source:UniProtKB/TrEMBL;Acc:Q93VT6]
AT2G31840	199.618	139.551	259.684	-0.895961	5.78e-05	0.000865199	down	1380	MRL7L	Thioredoxin-like fold domain-containing protein MRL7L, chloroplastic [Source:UniProtKB/Swiss-Prot;Acc:Q9SKB6]
AT3G15354	433.534	119.366	747.701	-2.64707	1.91e-25	2.24e-23	down	3125	SPA3	Protein SPA1-RELATED 3 [Source:UniProtKB/Swiss-Prot;Acc:Q9LJR3]
AT4G19100	16.8203	5.47952	28.1611	-2.36158	0.000154905	0.00207747	down	725	PAM68	Protein PAM68, chloroplastic [Source:UniProtKB/Swiss-Prot;Acc:O49668]
AT3G27830	580.485	305.532	855.437	-1.48534	2.58e-16	1.55e-14	down	993	RPL12A	RPL12-A [Source:UniProtKB/TrEMBL;Acc:A0A178VJ19]
AT4G21860	715.228	576.128	854.328	-0.568399	0.000926798	0.00987689	down	1080	MSRB2	Peptide methionine sulfoxide reductase B2, chloroplastic [Source:UniProtKB/Swiss-Prot;Acc:Q9C5C8]
AT2G27290	169.909	128.409	211.408	-0.719286	0.00204232	0.0192692	down	1041		At2g27290 [Source:UniProtKB/TrEMBL;Acc:Q9XIN6]
AT4G21280	277.295	18.3246	536.265	-4.87109	1.18e-77	1.14e-74	down	949	PSBQ1	Oxygen-evolving enhancer protein 3-1, chloroplastic [Source:UniProtKB/Swiss-Prot;Acc:Q9XFT3]
AT4G24420	18.9785	9.0148	28.9423	-1.68281	0.00256003	0.0233436	down	690		RNA-binding (RRM/RBD/RNP motifs) family protein [Source:UniProtKB/TrEMBL;Acc:Q9STV2]
AT1G64810	190.791	149.298	232.284	-0.637694	0.00349322	0.0302327	down	1820	APO1	APO RNA-binding protein (DUF794) [Source:UniProtKB/TrEMBL;Acc:F4I896]
AT3G25870	232.734	185.773	279.695	-0.590314	0.00476033	0.0390506	down	1372		unknown protein; BEST Arabidopsis thaliana protein match is: unknown protein (TAIR:AT1G13360.1); Ha. [Source:TAIR;Acc:AT3G25870]
AT1G78630	731.406	414.609	1048.2	-1.33809	4.88e-14	2.43e-12	down	1391	RPL13	50S ribosomal protein L13, chloroplastic [Source:UniProtKB/Swiss-Prot;Acc:Q9SYL9]
AT1G79520	372.33	264.508	480.151	-0.860177	7.23e-06	0.000129356	down	2543		Cation efflux family protein [Source:UniProtKB/TrEMBL;Acc:F4IF62]
AT5G10690	252.667	175.336	329.997	-0.912327	1.69e-05	0.000282044	down	2239	CBSPPR1	Pentatricopeptide repeat-containing protein At5g10690 [Source:UniProtKB/Swiss-Prot;Acc:Q8VYD6]
AT1G32870	305.468	244.739	366.198	-0.58138	0.00572774	0.0458146	down	1836	ANAC13	NAC domain protein 13 [Source:TAIR;Acc:AT1G32870]
AT1G76570	115.253	63.3185	167.187	-1.40076	1.53e-07	3.63e-06	down	1215	LHCB7	Chlorophyll a-b binding protein 7, chloroplastic [Source:UniProtKB/Swiss-Prot;Acc:Q9C9K1]
AT2G37240	129.466	58.2039	200.728	-1.78605	2.08e-12	9.02e-11	down	1262		Thioredoxin-like protein AAED1, chloroplastic [Source:UniProtKB/Swiss-Prot;Acc:Q9ZUU2]
AT4G35250	309.436	86.3558	532.515	-2.62446	4.64e-30	6.95e-28	down	1703		HCF244 [Source:UniProtKB/TrEMBL;Acc:A0A178UXV2]
AT1G72640	72.3256	29.9824	114.669	-1.93529	1.6e-09	5.1e-08	down	1290		At1g72640 [Source:UniProtKB/TrEMBL;Acc:Q6NMC1]
AT2G35260	186.925	12.0717	361.779	-4.90541	7.07e-53	3.05e-50	down	1878		At2g35260/T4C15.7 [Source:UniProtKB/TrEMBL;Acc:O82167]
AT2G28700	159.18	106.411	211.95	-0.994077	0.00198405	0.018776	down	1274	AGL46	AGAMOUS-like 46 [Source:UniProtKB/TrEMBL;Acc:F4IIT6]
AT5G34850	7019.92	4715.95	9323.89	-0.983383	2.53e-10	8.86e-09	down	2583	PAP26	Purple acid phosphatase [Source:UniProtKB/TrEMBL;Acc:A0A178UD94]
AT3G26650	784.604	22.514	1546.69	-6.10222	9.55e-148	7.96e-144	down	1752	GAPA1	Glyceraldehyde-3-phosphate dehydrogenase GAPA1, chloroplastic [Source:UniProtKB/Swiss-Prot;Acc:P25856]
AT2G23910	2140.26	391.753	3888.77	-3.3113	7.15e-05	0.00105037	down	1386		At2g23910 [Source:UniProtKB/TrEMBL;Acc:O82219]
AT5G45930	54.1078	20.5316	87.684	-2.09447	1.76e-09	5.57e-08	down	1534	CHLI2	Magnesium-chelatase subunit ChlI-2, chloroplastic [Source:UniProtKB/Swiss-Prot;Acc:Q5XF33]
AT2G20250	14.7946	5.9486	23.6406	-1.99065	0.00176325	0.0169755	down	2429		unknown protein; Ha. [Source:TAIR;Acc:AT2G20250]
AT5G13630	1143.09	45.7638	2240.42	-5.61342	4.69e-81	5.1e-78	down	4638	CHLH	Magnesium-chelatase subunit ChlH, chloroplastic [Source:UniProtKB/Swiss-Prot;Acc:Q9FNB0]
AT4G39070	988.086	388.762	1587.41	-2.02972	3.74e-06	7.05e-05	down	1422	BBX20	B-box zinc finger protein 20 [Source:UniProtKB/Swiss-Prot;Acc:Q0IGM7]
AT3G19170	2581.06	1604.08	3558.04	-1.14934	6.67e-13	3.01e-11	down	3595	PREP1	Presequence protease 1, chloroplastic/mitochondrial [Source:UniProtKB/Swiss-Prot;Acc:Q9LJL3]
AT3G48200	29.5451	3.44445	55.6458	-4.01393	6.54e-06	0.000117923	down	4073		Transmembrane protein [Source:UniProtKB/TrEMBL;Acc:Q0WV86]
AT4G02290	5053.45	3242.19	6864.71	-1.08223	0.00118983	0.0121818	down	2132	AtGH9B13	Endoglucanase 17 [Source:UniProtKB/Swiss-Prot;Acc:O81416]
AT5G46350	19.4692	9.62269	29.3156	-1.60716	0.00364867	0.0313825	down	1375	WRKY8	WRKY transcription factor 8 [Source:UniProtKB/Swiss-Prot;Acc:Q9FL26]
AT3G25730	949.443	742.046	1156.84	-0.640607	0.00169596	0.0164184	down	1495	ARF14	AP2/ERF and B3 domain-containing transcription factor ARF14 [Source:UniProtKB/Swiss-Prot;Acc:Q9LS06]
AT1G54030	3816.26	2990.58	4641.94	-0.634306	0.00185508	0.0177164	down	1585	MVP1	Inactive GDSL esterase/lipase-like protein 25 [Source:UniProtKB/Swiss-Prot;Acc:Q7XA74]
AT4G26520	30.3545	7.31127	53.3977	-2.86859	3.17e-09	9.67e-08	down	1636		Aldolase superfamily protein [Source:TAIR;Acc:AT4G26520]
AT3G25130	348.097	268.341	427.853	-0.673046	0.00438602	0.036422	down	1775		Acidic leucine-rich nuclear phosphoprotein 32 family B protein [Source:UniProtKB/TrEMBL;Acc:Q9LSG4]
AT5G59250	333.71	202.351	465.069	-1.20058	1.3e-09	4.19e-08	down	2021		D-xylose-proton symporter-like 3, chloroplastic [Source:UniProtKB/Swiss-Prot;Acc:Q0WWW9]
AT1G78010	429.056	307.984	550.129	-0.836917	0.000125209	0.0017156	down	1993		At1g78010 [Source:UniProtKB/TrEMBL;Acc:Q66GQ1]
AT1G80030	582.169	424.389	739.95	-0.80204	7.71e-06	0.000136887	down	2006		Molecular chaperone Hsp40/DnaJ family protein [Source:UniProtKB/TrEMBL;Acc:Q0WN54]
AT4G28740	192.068	13.1227	371.013	-4.82133	1.97e-44	5.72e-42	down	1416		FUNCTIONS IN: molecular_function unknown; INVOLVED IN: biological_process unknown; LOCATED IN: chloroplast; EXPRESSED IN: 21 plant structures; EXPRESSED DURING: 13 growth stages; CONTAINS InterPro DOMAIN/s: Protein of unknown function DUF3493 (Inter /.../R021883); BEST Arabidopsis thaliana protein match is: tetratricopeptide repeat (TPR)-containing protein (TAIR:AT1G02910.1); Ha. [Source:TAIR;Acc…
AT1G04990	822.608	624.476	1020.74	-0.708897	3.05e-05	0.000482604	down	1892		Zinc finger CCCH domain-containing protein 3 [Source:UniProtKB/Swiss-Prot;Acc:Q94AD9]
AT3G06125	483.087	255.087	711.088	-1.47904	5.56e-05	0.000836871	down	450		other RNA [Source:TAIR;Acc:AT3G06125]
AT1G04330	32.0344	16.74	47.3289	-1.49943	0.00101487	0.0106477	down	694		At1g04330 [Source:UniProtKB/TrEMBL;Acc:O22691]
AT5G57345	114.803	39.5397	190.067	-2.26513	7.66e-05	0.00111572	down	1000		At5g57345 [Source:UniProtKB/TrEMBL;Acc:Q8LAD4]
AT1G22550	1212.59	902.956	1522.22	-0.753451	0.000270092	0.00341361	down	1943	NPF5.16	Protein NRT1/ PTR FAMILY 5.16 [Source:UniProtKB/Swiss-Prot;Acc:Q9SK96]
AT2G33850	2205.13	1756.4	2653.86	-0.595473	0.000227154	0.00291363	down	1218		E6-like protein [Source:UniProtKB/TrEMBL;Acc:P93019]
AT2G33855	55.5742	12.5411	98.6073	-2.97503	1.77e-15	9.93e-14	down	897		At2g33855 [Source:UniProtKB/TrEMBL;Acc:Q29Q74]
AT1G55020	9363.77	7196.55	11531	-0.680139	0.00189062	0.0180283	down	3049	LOX1	Linoleate 9S-lipoxygenase 1 [Source:UniProtKB/Swiss-Prot;Acc:Q06327]
AT1G64720	3084.15	1651.71	4516.6	-1.45128	9.15e-05	0.00130666	down	1777	CP5	Polyketide cyclase/dehydrase and lipid transport superfamily protein [Source:UniProtKB/TrEMBL;Acc:Q9XIR9]
AT5G42900	239.592	159.891	319.294	-0.997796	0.0037365	0.0319328	down	1169	COR27	Cold regulated protein 27 [Source:UniProtKB/TrEMBL;Acc:Q8L8T7]
AT1G10360	193.151	60.7918	325.511	-2.42076	9.72e-25	1.06e-22	down	1018	GSTU18	Glutathione S-transferase U18 [Source:UniProtKB/Swiss-Prot;Acc:Q9FUS9]
AT4G02260	686.841	556.558	817.123	-0.554021	0.00133819	0.0133616	down	3304	RSH1	RSH1 [Source:UniProtKB/TrEMBL;Acc:A0A178V5K1]
AT3G26900	355.234	254.499	455.97	-0.841282	0.00117703	0.0120655	down	1179	SKL1	Probable inactive shikimate kinase like 1, chloroplastic [Source:UniProtKB/Swiss-Prot;Acc:Q9LW20]
AT3G14420	73.3236	5.91208	140.735	-4.57317	0.00122465	0.0124567	down	1515	GLO1	(S)-2-hydroxy-acid oxidase GLO1 [Source:UniProtKB/Swiss-Prot;Acc:Q9LRR9]
AT1G53887	36.4944	21.3157	51.6731	-1.2775	0.00145509	0.0143626	down	639		Putative uncharacterized protein [Source:UniProtKB/TrEMBL;Acc:Q0WN95]
AT5G06340	569.193	444.365	694.02	-0.643231	0.00044615	0.00524185	down	1035	NUDT27	Nudix hydrolase 27, chloroplastic [Source:UniProtKB/Swiss-Prot;Acc:Q9FNH4]
AT5G22090	3869.06	2721.78	5016.34	-0.882085	2.11e-08	5.72e-07	down	2064		Protein FAF-like, chloroplastic [Source:UniProtKB/Swiss-Prot;Acc:Q0V865]
AT4G14100	173.507	69.2177	277.797	-2.00482	1.98e-10	6.99e-09	down	782		Uncharacterized protein At4g14100 [Source:UniProtKB/Swiss-Prot;Acc:Q67YC9]
AT3G16360	6.33092	1.24338	11.4185	-3.19903	0.00399116	0.0337025	down	641	AHP4	AHP4 [Source:UniProtKB/TrEMBL;Acc:A0A384KT90]
AT5G24930	873.254	458.899	1287.61	-1.48845	1.8e-17	1.17e-15	down	1089	COL4	Zinc finger protein CONSTANS-LIKE 4 [Source:UniProtKB/Swiss-Prot;Acc:Q940T9]
AT1G14030	79.475	50.7386	108.212	-1.0927	0.000246367	0.00315038	down	1713	LSMT-L	[Fructose-bisphosphate aldolase]-lysine N-methyltransferase, chloroplastic [Source:UniProtKB/Swiss-Prot;Acc:Q9XI84]
AT5G05550	136.054	101.183	170.925	-0.7564	0.00259867	0.023627	down	1651		Sequence-specific DNA binding transcription factor [Source:UniProtKB/TrEMBL;Acc:F4K0Q7]
AT1G02340	212.864	26.2998	399.427	-3.92481	1.68e-06	3.35e-05	down	1428	HFR1	Transcription factor HFR1 [Source:UniProtKB/Swiss-Prot;Acc:Q9FE22]
AT2G34610	461.53	324.169	598.891	-0.885549	0.000745219	0.00815358	down	1136		Cotton fiber protein [Source:UniProtKB/TrEMBL;Acc:Q8VYN4]
AT1G70430	97.8995	69.0904	126.709	-0.874958	0.00153497	0.0150737	down	2104		Protein kinase superfamily protein [Source:TAIR;Acc:AT1G70430]
AT3G44450	41.1521	4.23614	78.0681	-4.20391	9.51e-18	6.34e-16	down	1165	BIC2	Protein BIC2 [Source:UniProtKB/Swiss-Prot;Acc:Q9M280]
AT2G05070	5.47165	0.377384	10.5659	-4.80724	0.000549091	0.00623983	down	1143	LHCB2.2	Chlorophyll a-b binding protein 2.2, chloroplastic [Source:UniProtKB/Swiss-Prot;Acc:Q9S7J7]
AT2G05075	44.4611	29.0429	59.8792	-1.04387	0.00464595	0.0382629	down	530
AT1G16720	713.787	280.631	1146.94	-2.03105	3.07e-29	4.37e-27	down	2142	HCF173	high chlorophyll fluorescence phenotype 173 [Source:TAIR;Acc:AT1G16720]
AT3G21890	21.7448	11.4926	31.997	-1.47723	0.00425095	0.0354817	down	1101	MIP1B	BBX31 [Source:UniProtKB/TrEMBL;Acc:A0A178VEW7]
AT4G04640	700.651	112.44	1288.86	-3.51888	2.79e-52	1.16e-49	down	1528	ATPC1	ATP synthase gamma chain 1, chloroplastic [Source:UniProtKB/Swiss-Prot;Acc:Q01908]
AT5G16810	104.224	78.7356	129.713	-0.720234	0.00625661	0.0494909	down	1606		Protein kinase superfamily protein [Source:UniProtKB/TrEMBL;Acc:Q8GWD0]
AT5G65683	1333	1017.43	1648.57	-0.696293	2.9e-05	0.000461839	down	2956	WAVH2	Probable E3 ubiquitin-protein ligase WAVH2 [Source:UniProtKB/Swiss-Prot;Acc:Q0WQX9]
AT1G11450	877.806	637.379	1118.23	-0.810997	0.000172931	0.00229564	down	1307		WAT1-related protein [Source:UniProtKB/TrEMBL;Acc:A0A178WNM5]
AT1G74730	31.9316	5.45999	58.4031	-3.41908	3.79e-12	1.59e-10	down	896		Transmembrane protein, putative (DUF1118) [Source:UniProtKB/TrEMBL;Acc:Q94F10]
AT4G25450	662.49	543.405	781.574	-0.524354	0.00343272	0.0298537	down	2407	ABCB28	ABC transporter B family member 28 [Source:UniProtKB/Swiss-Prot;Acc:Q8LPQ6]
AT2G24270	152.999	11.6764	294.322	-4.65572	8.12e-50	2.94e-47	down	2092	ALDH11A3	aldehyde dehydrogenase 11A3 [Source:TAIR;Acc:AT2G24270]
AT5G36700	4.76457	0	9.52913	#NAME?	0.000709905	0.00780833	down	1586	PGLP1A	Phosphoglycolate phosphatase 1B, chloroplastic [Source:UniProtKB/Swiss-Prot;Acc:P0DKC4]
AT5G07020	241.9	142.441	341.358	-1.26092	2.15e-09	6.7e-08	down	1130	MPH1	Protein MAINTENANCE OF PSII UNDER HIGH LIGHT 1 [Source:UniProtKB/Swiss-Prot;Acc:Q9FL44]
AT4G22240	1558.12	1210.4	1905.83	-0.654933	6.62e-05	0.00098238	down	1415	PAP2	Probable plastid-lipid-associated protein 2, chloroplastic [Source:UniProtKB/Swiss-Prot;Acc:O49629]
AT5G21222	232.429	77.7995	387.059	-2.31472	9.22e-17	5.68e-15	down	3108	ATC401	Pentatricopeptide repeat-containing protein At5g21222 [Source:UniProtKB/Swiss-Prot;Acc:Q8S9D1]
AT5G52970	66.2225	13.6283	118.817	-3.12406	1.01e-12	4.51e-11	down	1135		Thylakoid lumenal 15.0 kDa protein 2, chloroplastic [Source:UniProtKB/Swiss-Prot;Acc:Q9LVV5]
AT2G35155	452.55	332.414	572.687	-0.784763	2.02e-05	0.000332832	down	2429		Expressed protein [Source:UniProtKB/TrEMBL;Acc:Q8S8Q2]
AT1G69200	195.06	149.144	240.976	-0.692181	0.00138882	0.01379	down	1845	FLN2	Fructokinase-like 2, chloroplastic [Source:UniProtKB/Swiss-Prot;Acc:F4I0K2]
AT2G41720	297.243	198.747	395.739	-0.993617	6.97e-07	1.5e-05	down	2670	EMB2654	EMB2654 [Source:UniProtKB/TrEMBL;Acc:A0A178VXZ9]
AT1G62770	1295.29	717.903	1872.68	-1.38324	0.000418832	0.00498374	down	978	PMEI9	Pectinesterase inhibitor 9 [Source:UniProtKB/Swiss-Prot;Acc:Q9SI72]
AT4G18910	558.638	457.916	659.359	-0.52598	0.00368177	0.0315804	down	1128	NIP1-2	Aquaporin NIP1-2 [Source:UniProtKB/Swiss-Prot;Acc:Q8LFP7]
AT5G02270	3726.45	1548.1	5904.8	-1.93139	4.87e-07	1.08e-05	down	1336	ATNAP9	Non-intrinsic ABC protein 9 [Source:UniProtKB/TrEMBL;Acc:F4KCB8]
AT2G43030	548.306	331.948	764.663	-1.20387	5.5e-11	2.06e-09	down	1087	RPL3A	50S ribosomal protein L3-1, chloroplastic [Source:UniProtKB/Swiss-Prot;Acc:Q9SKX4]
AT4G33110	172.046	37.1931	306.899	-3.04466	1.24e-32	2.08e-30	down	1280		S-adenosyl-L-methionine-dependent methyltransferases superfamily protein [Source:UniProtKB/TrEMBL;Acc:Q8L788]
AT1G64340	6.84237	0.303948	13.3808	-5.4602	0.000360423	0.00438042	down	1253		unknown protein; BEST Arabidopsis thaliana protein match is: unknown protein (TAIR:AT5G41810.1); Ha. [Source:TAIR;Acc:AT1G64340]
AT2G21370	158.989	114.23	203.749	-0.834851	0.000419736	0.00499213	down	1633	XK-1	D-ribulose kinase [Source:UniProtKB/Swiss-Prot;Acc:Q8L794]
AT4G18280	55.3577	31.3722	79.3433	-1.33862	0.000389337	0.00467279	down	972		Glycine-rich cell wall protein-like protein [Source:UniProtKB/TrEMBL;Acc:F4JQT4]
AT5G37670	22.8427	11.0966	34.5888	-1.64019	0.0035223	0.0304527	down	834	HSP15.7	15.7 kDa heat shock protein, peroxisomal [Source:UniProtKB/Swiss-Prot;Acc:Q9FHQ3]
AT5G04360	210.571	122.529	298.612	-1.28515	3.59e-09	1.09e-07	down	3322	PU1	Pullulanase 1, chloroplastic [Source:UniProtKB/Swiss-Prot;Acc:Q8GTR4]
AT2G45850	28.0349	14.3648	41.7049	-1.53768	0.000845058	0.00910275	down	1878	AHL9	AT-hook motif nuclear-localized protein 9 [Source:UniProtKB/Swiss-Prot;Acc:O80834]
AT1G12800	661.377	468.734	854.02	-0.8655	8.59e-07	1.82e-05	down	2756		Nucleic acid-binding, OB-fold-like protein [Source:UniProtKB/TrEMBL;Acc:Q94AJ9]
AT3G14690	4351.01	2344.54	6357.49	-1.43915	1.1e-08	3.1e-07	down	2232	CYP72A15	Cytochrome P450, family 72, subfamily A, polypeptide 15 [Source:UniProtKB/TrEMBL;Acc:A0A1I9LLM3]
AT2G16365	738.873	337.221	1140.53	-1.75793	1.82e-11	7.12e-10	down	2266		F-box protein At2g16365 [Source:UniProtKB/Swiss-Prot;Acc:Q84V03]
AT4G12830	9.3292	0.303948	18.3545	-5.91616	0.000928255	0.00988399	down	1490		AT4g12830/T20K18_180 [Source:UniProtKB/TrEMBL;Acc:Q93ZN4]
AT1G23560	605.088	399.636	810.541	-1.0202	0.000922074	0.00984333	down	1302		F5O8.12 protein [Source:UniProtKB/TrEMBL;Acc:Q9ZUD8]
AT1G33560	709.026	324.599	1093.45	-1.75216	2.08e-22	1.94e-20	down	2929	ADR1	Disease resistance protein ADR1 [Source:UniProtKB/Swiss-Prot;Acc:Q9FW44]
AT3G52370	1546.24	1230.68	1861.8	-0.597246	0.00017786	0.00234881	down	1824	FLA15	FASCICLIN-like arabinogalactan protein 15 [Source:UniProtKB/TrEMBL;Acc:A0A1I9LLN6]
ATCG00020	3.88868	0	7.77737	#NAME?	0.00123684	0.0125653	down	1062	PSBA	Photosystem II protein D1 [Source:UniProtKB/Swiss-Prot;Acc:P83755]
AT1G74290	18.5717	6.47286	30.6705	-2.24438	7.94e-05	0.00115063	down	1116		Alpha/beta-Hydrolases superfamily protein [Source:UniProtKB/TrEMBL;Acc:Q9C914]
AT1G11530	50.828	29.0158	72.6402	-1.32393	0.00246023	0.0225652	down	652	CXXS1	Thioredoxin-like protein CXXS1 [Source:UniProtKB/Swiss-Prot;Acc:Q8LDI5]
AT5G64840	1107.12	837.369	1376.87	-0.717453	1.71e-05	0.000285406	down	2874	ABCF5	GCN5 [Source:UniProtKB/TrEMBL;Acc:A0A178UAA3]
AT5G60540	1388.46	966.113	1810.82	-0.906375	3.81e-08	9.96e-07	down	1174	PDX2	PDX2 [Source:UniProtKB/TrEMBL;Acc:A0A178UA48]
AT5G17220	43.7684	1.64835	85.8885	-5.70337	1.91e-05	0.000314433	down	1096	GSTF12	Glutathione S-transferase F12 [Source:UniProtKB/Swiss-Prot;Acc:Q9FE46]
AT4G35060	1055.96	856.101	1255.82	-0.552777	0.0025366	0.0231468	down	1123	HIPP25	HIPP25 [Source:UniProtKB/TrEMBL;Acc:A0A178V323]
AT5G50250	305.489	246.844	364.134	-0.560874	0.00465722	0.0383305	down	1136	CP31B	RNA-binding protein CP31B, chloroplastic [Source:UniProtKB/Swiss-Prot;Acc:Q9FGS0]
AT2G35340	368.918	293.401	444.435	-0.599097	0.00194516	0.0184849	down	3144	MEE29	Probable pre-mRNA-splicing factor ATP-dependent RNA helicase DEAH6 [Source:UniProtKB/Swiss-Prot;Acc:F4IJV4]
AT2G41312	94.1402	57.9853	130.295	-1.16802	0.00316446	0.0278401	down	563		other RNA [Source:TAIR;Acc:AT2G41312]
AT1G66840	31.9964	3.52722	60.4656	-4.09951	1.4e-14	7.32e-13	down	2402	PMI2	WEB2 [Source:UniProtKB/TrEMBL;Acc:A0A178WIG7]
AT3G15900	63.7022	35.785	91.6194	-1.3563	9.18e-05	0.00130917	down	738		At3g15900 [Source:UniProtKB/TrEMBL;Acc:Q9LSC1]
AT5G35170	470.639	382.566	558.713	-0.5464	0.00479678	0.0392853	down	2257		Adenylate kinase 5, chloroplastic [Source:UniProtKB/Swiss-Prot;Acc:Q8VYL1]
AT1G11330	689.161	487.628	890.694	-0.869149	5.13e-07	1.13e-05	down	3314		G-type lectin S-receptor-like serine/threonine-protein kinase At1g11330 [Source:UniProtKB/Swiss-Prot;Acc:Q9SXB8]
AT2G42130	157.758	118.51	197.006	-0.733233	0.00144474	0.0142717	down	1216	PAP13	Probable plastid-lipid-associated protein 13, chloroplastic [Source:UniProtKB/Swiss-Prot;Acc:Q8S9M1]
AT1G60870	489.527	328.076	650.979	-0.988582	8.7e-08	2.14e-06	down	1485	MEE9	Maternal effect embryo arrest 9 [Source:UniProtKB/TrEMBL;Acc:Q9C529]
AT3G55330	52.4891	13.5366	91.4415	-2.75598	4e-13	1.84e-11	down	1102	PPL1	PPL1 [Source:UniProtKB/TrEMBL;Acc:A0A178VEI8]
AT1G52230	50.5682	4.96245	96.174	-4.27652	2.75e-11	1.05e-09	down	702	PSAH2	Photosystem I reaction center subunit VI-2, chloroplastic [Source:UniProtKB/Swiss-Prot;Acc:Q9SUI6]
AT3G11630	1737.24	1434.59	2039.9	-0.507859	0.00163687	0.0159429	down	1176	BAS1	2-Cys peroxiredoxin BAS1, chloroplastic [Source:UniProtKB/Swiss-Prot;Acc:Q96291]
AT1G65070	495.867	396.026	595.708	-0.58901	0.00128984	0.0129877	down	2995		DNA mismatch repair protein MutS, type 2 [Source:UniProtKB/TrEMBL;Acc:Q9SS53]
AT1G09415	154.72	106.055	203.385	-0.939402	0.000101664	0.00143338	down	655	NIMIN-3	Protein NIM1-INTERACTING 3 [Source:UniProtKB/Swiss-Prot;Acc:Q9FNZ4]
AT2G25530	726.157	138.701	1313.61	-3.24349	6.02e-33	1.03e-30	down	2273		AFG1-like ATPase family protein [Source:UniProtKB/TrEMBL;Acc:Q9SKJ6]
AT1G06645	10.6994	0.708921	20.6898	-4.86715	6.47e-07	1.4e-05	down	1499		2-oxoglutarate (2OG) and Fe(II)-dependent oxygenase superfamily protein [Source:TAIR;Acc:AT1G06645]
AT5G25120	94.9541	21.9987	167.909	-2.93219	3.93e-06	7.35e-05	down	2017	CYP71B11	Cytochrome P450 71B11 [Source:UniProtKB/Swiss-Prot;Acc:P58049]
AT3G44100	1442.88	1146.65	1739.11	-0.60093	0.000208006	0.00268732	down	949		At3g44100 [Source:UniProtKB/TrEMBL;Acc:Q9LXQ2]
AT1G42550	539.67	111.892	967.448	-3.11208	1.6e-14	8.3e-13	down	3076	PMI1	Protein PLASTID MOVEMENT IMPAIRED 1 [Source:UniProtKB/Swiss-Prot;Acc:Q9C8E6]
AT5G45870	22.1236	0	44.2471	#NAME?	4.38e-17	2.76e-15	down	714	PYL12	Abscisic acid receptor PYL12 [Source:UniProtKB/Swiss-Prot;Acc:Q9FJ49]
AT1G49210	36.9399	23.0939	50.7858	-1.13691	0.00480962	0.0393775	down	876	ATL76	E3 ubiquitin-protein ligase ATL76 [Source:UniProtKB/Swiss-Prot;Acc:Q6NML0]
AT5G13770	89.4105	5.09193	173.729	-5.09248	1.34e-40	3.25e-38	down	2054		Pentatricopeptide repeat-containing protein At5g13770, chloroplastic [Source:UniProtKB/Swiss-Prot;Acc:Q66GP4]
AT1G30530	387.509	49.6412	725.376	-3.86912	1.65e-08	4.58e-07	down	1908	UGT78D1	Glycosyltransferase (Fragment) [Source:UniProtKB/TrEMBL;Acc:W8PVA4]
AT2G01850	1325.66	1121.2	1530.11	-0.448593	0.00577596	0.0461265	down	1545	XTH27	Probable xyloglucan endotransglucosylase/hydrolase protein 27 [Source:UniProtKB/Swiss-Prot;Acc:Q8LDS2]
AT5G42030	763.652	598.995	928.309	-0.63206	0.000264411	0.00335107	down	1152	ABIL4	ABL interactor-like protein 4 [Source:TAIR;Acc:AT5G42030]
AT1G27480	22.0543	1.84107	42.2674	-4.52093	3.57e-12	1.51e-10	down	1613	LCAT1	Lecithin-cholesterol acyltransferase-like 1 [Source:UniProtKB/Swiss-Prot;Acc:Q9FZI8]
AT1G29930	2566.15	103.464	5028.85	-5.60302	2.54e-160	3.18e-156	down	1230	LHCB1.3	Chlorophyll a-b binding protein 1, chloroplastic [Source:UniProtKB/Swiss-Prot;Acc:P04778]
AT3G25920	563.181	298.38	827.982	-1.47245	1.44e-15	8.1e-14	down	1144	RPL15	50S ribosomal protein L15, chloroplastic [Source:UniProtKB/Swiss-Prot;Acc:P25873]
AT1G77410	209.77	145.154	274.387	-0.918628	0.000632172	0.00704315	down	2572	BGAL16	beta-galactosidase 16 [Source:TAIR;Acc:AT1G77410]
AT1G52410	751.499	469.95	1033.05	-1.13633	0.00568564	0.0455215	down	2664	TSA1	TSK-associating protein 1 [Source:UniProtKB/Swiss-Prot;Acc:F4ICX9]
AT4G13550	638.52	354.732	922.308	-1.37852	1.03e-14	5.44e-13	down	2796		triglyceride lipases;triglyceride lipases [Source:TAIR;Acc:AT4G13550]
AT4G37200	191.178	150.775	231.581	-0.619119	0.0052212	0.042222	down	1135	HCF164	Thioredoxin-like protein HCF164, chloroplastic [Source:UniProtKB/Swiss-Prot;Acc:O23166]
AT3G13120	458.972	257.437	660.508	-1.35936	7.51e-10	2.49e-08	down	1212	RPS10	30S ribosomal protein S10, chloroplastic [Source:UniProtKB/Swiss-Prot;Acc:Q9LK61]
AT1G10760	1649.98	1159.43	2140.52	-0.884544	6.78e-08	1.71e-06	down	4845	GWD1	Alpha-glucan water dikinase 1, chloroplastic [Source:UniProtKB/Swiss-Prot;Acc:Q9SAC6]
AT5G57790	74.4883	53.1956	95.7809	-0.848432	0.00536733	0.0433057	down	2538		unknown protein; Ha. [Source:TAIR;Acc:AT5G57790]
AT2G14080	55.3412	31.5399	79.1425	-1.32727	0.000188923	0.0024727	down	3840		Disease resistance protein (TIR-NBS-LRR class) family [Source:UniProtKB/TrEMBL;Acc:F4IFF6]
AT5G24120	520.761	122.945	918.576	-2.90138	1.46e-26	1.82e-24	down	2128	SIGE	RNA polymerase sigma factor sigE, chloroplastic/mitochondrial [Source:UniProtKB/Swiss-Prot;Acc:Q9ZNX9]
AT2G21710	106.58	78.2562	134.904	-0.785654	0.00235767	0.0217843	down	2153	MTERF2	Transcription termination factor MTERF2, chloroplastic [Source:UniProtKB/Swiss-Prot;Acc:F4IHL3]
AT3G50685	204.608	145.769	263.448	-0.853834	0.000105921	0.00148503	down	680		AT3g50680/T3A5_60 [Source:UniProtKB/TrEMBL;Acc:Q941E5]
AT1G03130	85.3032	25.7272	144.879	-2.49349	6.86e-11	2.53e-09	down	956	PSAD2	Photosystem I reaction center subunit II-2, chloroplastic [Source:UniProtKB/Swiss-Prot;Acc:Q9SA56]
AT4G25650	711.539	568.304	854.773	-0.588877	0.00175959	0.0169472	down	1878	PTC52	Protochlorophyllide-dependent translocon component 52, chloroplastic [Source:UniProtKB/Swiss-Prot;Acc:Q8W496]
AT1G30080	594.758	331.652	857.864	-1.37108	6.91e-14	3.39e-12	down	1942		Glycosyl hydrolase superfamily protein [Source:UniProtKB/TrEMBL;Acc:F4I4R0]
AT2G26975	32.8459	8.84879	56.843	-2.68343	3.44e-09	1.04e-07	down	969	COPT6	Copper transporter 6 [Source:UniProtKB/Swiss-Prot;Acc:Q8GWP3]
AT3G19450	7668.39	6217.12	9119.65	-0.552731	0.000330994	0.00407423	down	1813	CAD4	Cinnamyl alcohol dehydrogenase 4 [Source:UniProtKB/Swiss-Prot;Acc:P48523]
AT2G31160	195.291	132.04	258.543	-0.969432	8.29e-06	0.000146371	down	1789	LSH3	Protein LIGHT-DEPENDENT SHORT HYPOCOTYLS 3 [Source:UniProtKB/Swiss-Prot;Acc:O82268]
AT3G44310	5464.87	3009.09	7920.65	-1.39629	2.49e-09	7.69e-08	down	1508	NIT1	NITI [Source:UniProtKB/TrEMBL;Acc:A0A384KJ08]
AT2G05620	197.427	39.6399	355.215	-3.16367	1.88e-18	1.32e-16	down	1080	PGR5	Protein PROTON GRADIENT REGULATION 5, chloroplastic [Source:UniProtKB/Swiss-Prot;Acc:Q9SL05]
AT5G20220	30.3934	4.54814	56.2386	-3.62821	1.29e-12	5.74e-11	down	1427		zinc knuckle (CCHC-type) family protein [Source:TAIR;Acc:AT5G20220]
AT5G67480	901.209	712.448	1089.97	-0.61343	0.00145199	0.0143376	down	1819	BT4	BTB and TAZ domain protein 4 [Source:TAIR;Acc:AT5G67480]
AT2G47370	138.837	95.267	182.407	-0.937116	9.95e-05	0.001407	down	1352		At2g47370 [Source:UniProtKB/TrEMBL;Acc:O22911]
AT3G16750	131.027	99.0635	162.99	-0.718361	0.00423354	0.0353908	down	1251		Putative uncharacterized protein [Source:UniProtKB/TrEMBL;Acc:Q9LUQ8]
AT4G01800	1162.18	693.192	1631.16	-1.23457	5.37e-05	0.000810035	down	3331	AGY1	Albino or Glassy Yellow 1 [Source:UniProtKB/TrEMBL;Acc:F4JG57]
AT3G26280	6.78653	0.994611	12.5784	-3.66068	0.00079923	0.0086726	down	1816	CYP71B4	Cytochrome P450, family 71, subfamily B, polypeptide 4 [Source:UniProtKB/TrEMBL;Acc:A0A1I9LMQ2]
AT5G35220	286.342	208.292	364.392	-0.806888	6.85e-05	0.00101187	down	1898	EGY1	Probable zinc metalloprotease EGY1, chloroplastic [Source:UniProtKB/Swiss-Prot;Acc:Q949Y5]
AT2G04795	111.893	75.6651	148.121	-0.969076	0.000225761	0.00290172	down	759		AT2g04793 [Source:UniProtKB/TrEMBL;Acc:Q94JV8]
AT1G52590	80.4965	48.2509	112.742	-1.2244	3.06e-05	0.000484161	down	784		DCC family protein At1g52590, chloroplastic [Source:UniProtKB/Swiss-Prot;Acc:Q9SSR1]
AT2G25930	3402.18	2392.6	4411.76	-0.882774	1.21e-05	0.000208319	down	2749	ELF3	Protein EARLY FLOWERING 3 [Source:UniProtKB/Swiss-Prot;Acc:O82804]
AT3G44880	140.596	75.6015	205.591	-1.44329	6.14e-09	1.8e-07	down	2017	PAO	Pheophorbide a oxygenase, chloroplastic [Source:UniProtKB/Swiss-Prot;Acc:Q9FYC2]
AT1G14720	1324.29	1084.37	1564.21	-0.528578	0.00125994	0.0127276	down	1491	XTH28	Xyloglucan endotransglucosylase/hydrolase [Source:UniProtKB/TrEMBL;Acc:A0A178W9E1]
AT1G05200	461.151	304.667	617.634	-1.01952	4.39e-06	8.15e-05	down	2867	GLR3.4	Glutamate receptor [Source:UniProtKB/TrEMBL;Acc:Q53YX3]
AT1G31650	299.084	229.555	368.613	-0.683267	0.00155365	0.0152392	down	2254	ROPGEF14	Rop guanine nucleotide exchange factor 14 [Source:UniProtKB/Swiss-Prot;Acc:Q56WM6]
AT4G26370	154.481	87.8544	221.108	-1.33157	2.12e-08	5.74e-07	down	1518		Antitermination NusB domain-containing protein [Source:UniProtKB/TrEMBL;Acc:Q93XY7]
AT3G19800	50.5336	2.07159	98.9955	-5.57856	2.92e-25	3.33e-23	down	948		Large ribosomal RNA subunit accumulation protein YCED homolog 2, chloroplastic [Source:UniProtKB/Swiss-Prot;Acc:Q9C5M1]
AT5G58770	300.377	100.629	500.126	-2.31324	1.7e-12	7.45e-11	down	1328		Dehydrodolichyl diphosphate synthase 2 [Source:UniProtKB/Swiss-Prot;Acc:Q56Y11]
AT1G75350	342.16	188.798	495.523	-1.39211	2.54e-12	1.09e-10	down	849	RPL31	50S ribosomal protein L31, chloroplastic [Source:UniProtKB/Swiss-Prot;Acc:Q9FWS4]
AT5G58480	232.834	162.566	303.102	-0.898773	1.68e-05	0.000280835	down	1712		Glucan endo-1,3-beta-glucosidase 9 [Source:UniProtKB/Swiss-Prot;Acc:Q9FGH4]
AT1G78530	105.592	66.6265	144.558	-1.11748	0.000113556	0.00157219	down	1484		Receptor-like serine/threonine-protein kinase At1g78530 [Source:UniProtKB/Swiss-Prot;Acc:Q9SYM9]
AT5G15910	751.631	394.819	1108.44	-1.48927	5.29e-12	2.18e-10	down	1240		NAD(P)-binding Rossmann-fold superfamily protein [Source:UniProtKB/TrEMBL;Acc:Q949S7]
AT2G47940	931.089	706.549	1155.63	-0.709815	4.17e-05	0.000642024	down	2320	DEGP2	EMB3117 [Source:UniProtKB/TrEMBL;Acc:A0A178VUR8]
AT1G68570	160.676	121.973	199.379	-0.708951	0.00233893	0.0216511	down	1976	NPF3.1	Protein NRT1/ PTR FAMILY 3.1 [Source:UniProtKB/Swiss-Prot;Acc:Q9SX20]
AT3G08010	173.126	96.5422	249.709	-1.37102	4.14e-08	1.08e-06	down	1280	ATAB2	ATAB2 [Source:UniProtKB/TrEMBL;Acc:A0A178V658]
AT4G18810	82.8731	15.4409	150.305	-3.28306	3.94e-23	3.85e-21	down	2298		NAD(P)-binding Rossmann-fold superfamily protein [Source:UniProtKB/TrEMBL;Acc:F4JRN8]
AT5G35790	275.407	27.3577	523.457	-4.25805	2.81e-16	1.69e-14	down	2082	G6PD1	Glucose-6-phosphate 1-dehydrogenase 1, chloroplastic [Source:UniProtKB/Swiss-Prot;Acc:Q43727]
AT5G19025	162.059	125.359	198.759	-0.66496	0.00390863	0.0331736	down	1147		Ribosomal protein L34e superfamily protein [Source:TAIR;Acc:AT5G19025]
AT5G43750	124.713	92.0358	157.39	-0.774074	0.00247601	0.0226767	down	1002	PNSB5	PnsB5 [Source:UniProtKB/TrEMBL;Acc:A0A178UJI2]
AT4G18350	70.7743	49.3203	92.2284	-0.90303	0.00313818	0.0276673	down	2392	NCED2	9-cis-epoxycarotenoid dioxygenase NCED2, chloroplastic [Source:UniProtKB/Swiss-Prot;Acc:O49505]
AT3G27850	507.194	222.198	792.19	-1.834	2.52e-18	1.76e-16	down	959	RPL12C	50S ribosomal protein L12-3, chloroplastic [Source:UniProtKB/Swiss-Prot;Acc:P36212]
AT2G45740	160.027	89.4055	230.649	-1.36726	1.09e-08	3.08e-07	down	1208	PEX11D	Peroxisomal membrane protein 11D [Source:UniProtKB/Swiss-Prot;Acc:O80845]
AT5G65590	61.3482	34.401	88.2954	-1.35989	2.78e-05	0.000443118	down	1488	DOF5.7	Dof zinc finger protein DOF5.7 [Source:UniProtKB/Swiss-Prot;Acc:Q9LSL6]
AT2G26740	160.434	61.2735	259.594	-2.08292	1.73e-09	5.48e-08	down	1371	ATSEH	At2g26740/F18A8.11 [Source:UniProtKB/TrEMBL;Acc:Q42566]
AT5G56860	16.283	0	32.566	#NAME?	7.14e-13	3.22e-11	down	1790	GATA21	GATA transcription factor 21 [Source:UniProtKB/Swiss-Prot;Acc:Q5HZ36]
AT3G19480	19.8369	5.28465	34.3891	-2.70207	2.09e-06	4.11e-05	down	2070	PGDH3	D-3-phosphoglycerate dehydrogenase 3, chloroplastic [Source:UniProtKB/Swiss-Prot;Acc:Q9LT69]
AT1G01080	208.164	142.438	273.89	-0.943266	1.03e-05	0.000178158	down	1592		RNA-binding (RRM/RBD/RNP motifs) family protein [Source:UniProtKB/TrEMBL;Acc:F4HQH8]
AT5G66760	10533.9	7906.96	13160.8	-0.735053	1.9e-06	3.76e-05	down	2546	SDH1-1	Succinate dehydrogenase [ubiquinone] flavoprotein subunit, mitochondrial [Source:UniProtKB/TrEMBL;Acc:A0A178UAN3]
AT1G66540	68.4967	20.83	116.163	-2.47942	1.02e-13	4.91e-12	down	1962		At1g66540 [Source:UniProtKB/TrEMBL;Acc:A2RVN3]
AT1G48650	1617.92	1330.63	1905.2	-0.517826	0.00167025	0.0162112	down	4100		DEA(D/H)-box RNA helicase family protein [Source:UniProtKB/TrEMBL;Acc:F4HYJ6]
AT1G54780	102.545	4.01496	201.074	-5.6462	1.86e-48	6.22e-46	down	1214	TLP18.3	TLP18.3 [Source:UniProtKB/TrEMBL;Acc:A0A178WHT4]
AT1G31190	176.708	139.697	213.72	-0.613419	0.00609918	0.048322	down	1335	IMPL1	Phosphatase IMPL1, chloroplastic [Source:UniProtKB/Swiss-Prot;Acc:Q94F00]
AT3G57720	23.374	11.7677	34.9804	-1.57171	0.00172974	0.0167027	down	4069		At3g57720 [Source:UniProtKB/TrEMBL;Acc:A1A6H5]
AT3G02060	527.269	411.715	642.823	-0.642776	0.000397719	0.00475968	down	2915		ATP-dependent DNA helicase At3g02060, chloroplastic [Source:UniProtKB/Swiss-Prot;Acc:F4JFJ3]
AT5G51820	400.434	295.47	505.398	-0.774406	3.95e-05	0.000611687	down	2499	PGMP	Phosphoglucomutase, chloroplastic [Source:UniProtKB/Swiss-Prot;Acc:Q9SCY0]
AT2G36000	302.044	186.101	417.987	-1.16737	9.76e-09	2.78e-07	down	1885		At2g36000/F11F19.9 [Source:UniProtKB/TrEMBL;Acc:Q9SJ50]
AT4G03200	1190.6	948.28	1432.93	-0.595581	0.000279076	0.00350767	down	2871		catalytics [Source:TAIR;Acc:AT4G03200]
AT1G77490	102.364	57.2747	147.453	-1.36428	4.04e-05	0.00062502	down	2073	APXT	L-ascorbate peroxidase T, chloroplastic [Source:UniProtKB/Swiss-Prot;Acc:Q42593]
AT1G60950	782.734	198.833	1366.63	-2.781	8.83e-51	3.34e-48	down	985	FD2	Ferredoxin [Source:UniProtKB/TrEMBL;Acc:A0A178W2W5]
AT1G23400	288.734	199.378	378.09	-0.923221	3.2e-05	0.000503868	down	3046	CAF2	CAF2 [Source:UniProtKB/TrEMBL;Acc:A0A178WC04]
AT5G27300	36.8474	23.3873	50.3075	-1.10505	0.00448965	0.0371592	down	1769		Pentatricopeptide (PPR) repeat-containing protein [Source:UniProtKB/TrEMBL;Acc:F4K2V9]
AT3G61460	654.962	506.862	803.061	-0.663917	0.00485599	0.0396921	down	1262	BRH1	BRH1 RING finger protein [Source:UniProtKB/TrEMBL;Acc:Q9XF92]
AT4G34730	376.215	203.543	548.888	-1.43118	9.21e-14	4.46e-12	down	1622		Probable ribosome-binding factor A, chloroplastic [Source:UniProtKB/Swiss-Prot;Acc:O65693]
AT4G01310	523.651	292.51	754.792	-1.36759	1.48e-09	4.73e-08	down	1130	RPL5	50S ribosomal protein L5, chloroplastic [Source:UniProtKB/Swiss-Prot;Acc:O04603]
AT5G08510	215.331	172.615	258.046	-0.580073	0.00587008	0.0467141	down	2661	PCMP-E20	Pentatricopeptide repeat-containing protein At5g08510 [Source:UniProtKB/Swiss-Prot;Acc:Q9FNN7]
AT4G00040	1636.13	1321.86	1950.4	-0.561201	0.000786102	0.00855985	down	1366		Type III polyketide synthase C [Source:UniProtKB/Swiss-Prot;Acc:O81305]
AT3G25640	520.395	361.31	679.481	-0.911199	7.08e-07	1.52e-05	down	1161		Protein of unknown function, DUF617 [Source:TAIR;Acc:AT3G25640]
AT3G15360	391.519	270.645	512.393	-0.920849	4.18e-06	7.78e-05	down	1168	ATHM4	TRX-M4 [Source:UniProtKB/TrEMBL;Acc:A0A178VJ83]
AT3G01180	609.417	483.028	735.806	-0.60722	0.000693333	0.00764623	down	3023	SS2	Starch synthase, chloroplastic/amyloplastic (Fragment) [Source:UniProtKB/TrEMBL;Acc:W8QNS2]
AT4G01050	465.527	117.398	813.657	-2.79301	5.7e-44	1.62e-41	down	1934	TROL	thylakoid rhodanese-like [Source:TAIR;Acc:AT4G01050]
AT1G23360	228.234	177.8	278.667	-0.64829	0.00214025	0.0200419	down	1244	MENG	2-phytyl-1,4-beta-naphthoquinone methyltransferase, chloroplastic [Source:UniProtKB/Swiss-Prot;Acc:Q3ED65]
AT5G57360	1186.12	855.413	1516.82	-0.826356	7.67e-06	0.000136549	down	2333	ZTL	Galactose oxidase/kelch repeat superfamily protein [Source:UniProtKB/TrEMBL;Acc:F4KAN2]
AT2G17033	311.779	248.188	375.37	-0.596884	0.00257145	0.0234136	down	2036		Pentatricopeptide repeat-containing protein At2g17033 [Source:UniProtKB/Swiss-Prot;Acc:Q8GWA9]
AT5G63380	504.944	335.725	674.163	-1.00582	2.41e-08	6.5e-07	down	2060	4CLL9	4-coumarate--CoA ligase-like 9 [Source:UniProtKB/Swiss-Prot;Acc:Q84P23]
AT3G25820	200.633	125.774	275.492	-1.13117	0.00327407	0.0286636	down	2107	TPS27	1,8-cineole synthase 2, chloroplastic [Source:UniProtKB/Swiss-Prot;Acc:P0DI77]
AT1G78600	1274.61	725.286	1823.94	-1.33044	1.36e-15	7.7e-14	down	1526	LZF1	Light-regulated zinc finger protein 1 [Source:UniProtKB/TrEMBL;Acc:F4IBS4]
AT1G48440	1586.84	1319.58	1854.11	-0.49065	0.002522	0.0230641	down	801		At1g48440 [Source:UniProtKB/TrEMBL;Acc:Q8LDS7]
AT4G36190	855.697	709.739	1001.65	-0.497024	0.00335769	0.0292929	down	1910		At4g36190 [Source:UniProtKB/TrEMBL;Acc:A4VCL8]
AT4G02790	245.551	181.366	309.735	-0.77213	0.000215687	0.00278081	down	1497	DGP3	DAR GTPase 3, chloroplastic [Source:UniProtKB/Swiss-Prot;Acc:Q8H1F6]
AT4G29590	416.196	207.703	624.69	-1.58862	4.42e-17	2.78e-15	down	1912		S-adenosyl-L-methionine-dependent methyltransferases superfamily protein [Source:UniProtKB/TrEMBL;Acc:Q9SU88]
AT1G54570	1338.41	679.131	1997.68	-1.55657	1.38e-20	1.14e-18	down	2756		Acyltransferase-like protein At1g54570, chloroplastic [Source:UniProtKB/Swiss-Prot;Acc:Q9ZVN2]
AT1G69870	327.323	192.452	462.194	-1.264	1.83e-06	3.62e-05	down	2420	NPF2.13	Protein NRT1/ PTR FAMILY 2.13 [Source:UniProtKB/Swiss-Prot;Acc:Q8RX77]
AT2G44920	51.6144	3.05687	100.172	-5.03428	1.62e-14	8.38e-13	down	1134		Thylakoid lumenal 15 kDa protein 1, chloroplastic [Source:UniProtKB/Swiss-Prot;Acc:O22160]
AT5G45060	675.167	474.687	875.647	-0.883374	3.35e-07	7.65e-06	down	4397	RPS4B	Disease resistance protein RPS4B [Source:UniProtKB/Swiss-Prot;Acc:Q9FHF0]
AT2G38210	27.1309	8.47101	45.7908	-2.43445	6.15e-07	1.33e-05	down	974	PDX1L4	Pyridoxal 5'-phosphate synthase PDX1-like 4 [Source:UniProtKB/Swiss-Prot;Acc:O80446]
AT5G16990	196.694	154.743	238.644	-0.62499	0.00422498	0.0353311	down	1956	P2	NADP-dependent alkenal double bond reductase P2 [Source:UniProtKB/Swiss-Prot;Acc:Q39173]
AT3G27400	427.164	235.535	618.792	-1.39351	1.03e-05	0.00017822	down	1514		Pectate lyase [Source:UniProtKB/TrEMBL;Acc:A0A1I9LNU6]
AT3G24190	1624.9	649.299	2600.5	-2.00183	1.83e-23	1.82e-21	down	2786		AT3g24190/MUJ8_17 [Source:UniProtKB/TrEMBL;Acc:Q9LRN0]
AT5G39760	172.792	128.248	217.336	-0.760992	0.000559144	0.0063282	down	1511	ZHD10	Zinc-finger homeodomain protein 10 [Source:UniProtKB/Swiss-Prot;Acc:Q9FIW9]
AT1G50060	534.697	426.145	643.249	-0.594034	0.00105108	0.010986	down	765		CAP (Cysteine-rich secretory proteins, Antigen 5, and Pathogenesis-related 1 protein) superfamily protein [Source:UniProtKB/TrEMBL;Acc:Q9LPM7]
AT1G52510	59.8649	26.5193	93.2106	-1.81345	6.91e-08	1.74e-06	down	1384		Alpha/beta-Hydrolases superfamily protein [Source:UniProtKB/TrEMBL;Acc:Q8VZ57]
AT5G57930	457.415	278.823	636.007	-1.18969	2.3e-09	7.15e-08	down	1588	APO2	Emb1629 [Source:UniProtKB/TrEMBL;Acc:A0A178UP75]
AT4G39040	211.557	132.085	291.028	-1.13969	2.5e-05	0.000404719	down	1142		At4g39040 [Source:UniProtKB/TrEMBL;Acc:Q9SVI9]
AT1G04620	196.217	130.83	261.605	-0.999696	5.71e-06	0.000104032	down	2222	HCAR	7-hydroxymethyl chlorophyll a reductase, chloroplastic [Source:UniProtKB/Swiss-Prot;Acc:Q8GS60]
AT1G78020	985.531	655.714	1315.35	-1.00431	3.72e-09	1.12e-07	down	1015	FLZ6	FCS-Like Zinc finger 6 [Source:UniProtKB/Swiss-Prot;Acc:Q9SGZ8]
AT3G01440	5.36638	0	10.7328	#NAME?	0.000103787	0.0014592	down	988	PNSL3	Photosynthetic NDH subunit of lumenal location 3, chloroplastic [Source:UniProtKB/Swiss-Prot;Acc:Q9SGH4]
AT2G33080	14.7673	3.24153	26.2931	-3.01994	0.00628831	0.0496631	down	2436	AtRLP28
AT2G36690	582.268	231.49	933.045	-2.011	5.25e-12	2.17e-10	down	1292		2-oxoglutarate (2OG) and Fe(II)-dependent oxygenase superfamily protein [Source:UniProtKB/TrEMBL;Acc:F4INZ9]
AT5G17870	597.449	381.929	812.969	-1.0899	1.72e-09	5.46e-08	down	745	PSRP6	plastid-specific 50S ribosomal protein 6 [Source:TAIR;Acc:AT5G17870]
AT5G10470	1715.04	829.519	2600.57	-1.64848	1.77e-10	6.29e-09	down	4077	KCA1	kinesin like protein for actin based chloroplast movement 1 [Source:TAIR;Acc:AT5G10470]
AT1G64770	44.475	2.90999	86.0399	-4.88592	1.78e-22	1.68e-20	down	1658	NDF2	NDH-dependent cyclic electron flow 1 [Source:UniProtKB/TrEMBL;Acc:F4I890]
AT5G52440	352.671	232.641	472.701	-1.02282	5.61e-06	0.000102487	down	1244	TATB	Sec-independent protein translocase protein TATB, chloroplastic [Source:UniProtKB/Swiss-Prot;Acc:Q9XH75]
AT5G35970	1046.1	540.604	1551.6	-1.52112	6.84e-19	5.03e-17	down	3475		P-loop containing nucleoside triphosphate hydrolases superfamily protein [Source:UniProtKB/TrEMBL;Acc:F4K1G7]
AT1G62540	562.43	327.839	797.021	-1.28163	7.25e-08	1.81e-06	down	1868	FMO GS-OX2	flavin-monooxygenase glucosinolate S-oxygenase 2 [Source:TAIR;Acc:AT1G62540]
AT4G15490	98.1476	13.0369	183.258	-3.8132	2.5e-11	9.58e-10	down	2051	UGT84A3	UDP-glycosyltransferase 84A3 [Source:UniProtKB/Swiss-Prot;Acc:O23401]
AT3G63160	21.7898	7.84485	35.7347	-2.18751	0.000389952	0.00467793	down	636		OEP6 [Source:UniProtKB/TrEMBL;Acc:A0A384KZL8]
AT4G21445	10.3755	0	20.7511	#NAME?	7.46e-06	0.000132917	down	826		At4g21445 [Source:UniProtKB/TrEMBL;Acc:Q8W1B3]
AT1G20440	24538.6	16534.1	32543.1	-0.976908	3.86e-06	7.24e-05	down	2320	COR47	RD17 [Source:UniProtKB/TrEMBL;Acc:A0A384KK16]
AT3G14067	6248.27	5055.86	7440.69	-0.55748	0.00396777	0.0335277	down	2907	SBT1.4	Subtilisin-like protease SBT1.4 [Source:UniProtKB/Swiss-Prot;Acc:Q9LVJ1]
AT5G03230	456.491	244.912	668.07	-1.44774	2.21e-14	1.13e-12	down	1126		Arabidopsis thaliana genomic DNA, chromosome 5, P1 clone:MOK16 [Source:UniProtKB/TrEMBL;Acc:Q9LYW2]
AT4G37510	515.584	392.465	638.703	-0.702582	0.000119427	0.00164398	down	1985	RNC1	Ribonuclease III domain-containing protein RNC1, chloroplastic [Source:UniProtKB/Swiss-Prot;Acc:Q9SZV0]
AT1G05850	12927.5	10638.5	15216.5	-0.516348	0.000990004	0.0104261	down	1762	CTL1	Chitinase-like protein 1 [Source:UniProtKB/Swiss-Prot;Acc:Q9MA41]
AT3G16350	587.106	174.74	999.473	-2.51596	1.12e-08	3.15e-07	down	1965		At3g16350 [Source:UniProtKB/TrEMBL;Acc:Q84TG2]
AT2G28800	1776.4	1237.51	2315.29	-0.903751	0.000121477	0.00166761	down	1745	ALB3	ALB3 [Source:UniProtKB/TrEMBL;Acc:A0A178VUV3]
AT5G23060	94.8786	32.1011	157.656	-2.29609	6.48e-08	1.64e-06	down	1568	CAS	Calcium sensing receptor, chloroplastic [Source:UniProtKB/Swiss-Prot;Acc:Q9FN48]
AT2G41000	462.149	229.329	694.97	-1.59953	1.8e-14	9.3e-13	down	1032		Chaperone DnaJ-domain superfamily protein [Source:UniProtKB/TrEMBL;Acc:B3H694]
AT2G26540	191.195	148.525	233.864	-0.654957	0.00307347	0.0271542	down	1505	UROS	Uroporphyrinogen-III synthase, chloroplastic [Source:UniProtKB/Swiss-Prot;Acc:O48721]
AT2G34640	430.173	351.425	508.921	-0.534224	0.00476531	0.0390587	down	2084	PTAC12	Protein PLASTID TRANSCRIPTIONALLY ACTIVE 12, chloroplastic [Source:UniProtKB/Swiss-Prot;Acc:F4IHY7]
AT2G39190	771.328	449.381	1093.28	-1.28265	4.79e-13	2.19e-11	down	2892	ATATH8	Protein kinase superfamily protein [Source:UniProtKB/TrEMBL;Acc:O80962]
AT2G36080	667.74	500.042	835.439	-0.740485	0.000112332	0.00156178	down	1733	ARF31	B3 domain-containing protein At2g36080 [Source:UniProtKB/Swiss-Prot;Acc:Q8GYJ2]
AT5G66040	4430.11	3353.83	5506.39	-0.715299	6.3e-06	0.000114068	down	770	STR16	Thiosulfate sulfurtransferase 16, chloroplastic [Source:UniProtKB/Swiss-Prot;Acc:Q39129]
AT4G23496	434.172	94.5429	773.801	-3.03292	2.95e-18	2.05e-16	down	1074	SP1L5	Protein SPIRAL1-like 5 [Source:UniProtKB/Swiss-Prot;Acc:Q8LGD1]
AT4G23493	243.251	138.958	347.545	-1.32255	7.33e-07	1.56e-05	down	730		Putative uncharacterized protein [Source:UniProtKB/TrEMBL;Acc:Q8LC94]
AT1G67360	1511.68	1053.02	1970.34	-0.903912	3.66e-08	9.63e-07	down	1171		REF/SRPP-like protein At1g67360 [Source:UniProtKB/Swiss-Prot;Acc:Q9FYF7]
AT4G03280	388.24	20.5524	755.928	-5.20087	1.49e-97	2.86e-94	down	1034	PETC	Cytochrome b6-f complex iron-sulfur subunit, chloroplastic [Source:UniProtKB/Swiss-Prot;Acc:Q9ZR03]
AT1G48350	314.228	195.882	432.574	-1.14296	4.37e-08	1.13e-06	down	897	RPL18	Uncharacterized protein At1g48350 [Source:UniProtKB/TrEMBL;Acc:Q0WWC5]
AT3G08860	924.255	769.989	1078.52	-0.486143	0.00514627	0.0417646	down	1986	PYD4	Alanine--glyoxylate aminotransferase 2 homolog 3, mitochondrial [Source:UniProtKB/Swiss-Prot;Acc:Q9SR86]
AT4G38225	308.699	229.602	387.795	-0.756159	0.000465494	0.00543048	down	1286		unknown protein; FUNCTIONS IN: molecular_function unknown; INVOLVED IN: biological_process unknown; LOCATED IN: chloroplast; EXPRESSED IN: 21 plant structures; EXPRESSED DURING: 13 growth stages; Ha. [Source:TAIR;Acc:AT4G38225]
AT1G45230	290.37	137.479	443.261	-1.68894	2.32e-08	6.26e-07	down	1132	DCL	Protein DCL homolog, chloroplastic [Source:UniProtKB/Swiss-Prot;Acc:Q9C642]
AT1G15510	116.381	81.6218	151.14	-0.888859	0.000541834	0.00616857	down	2648	PCMP-H73	Pentatricopeptide repeat-containing protein At1g15510, chloroplastic [Source:UniProtKB/Swiss-Prot;Acc:Q9M9E2]
AT4G15510	130.913	100.367	161.459	-0.685879	0.00408447	0.034312	down	1257	PPD1	PPD1 [Source:UniProtKB/TrEMBL;Acc:A0A178UV94]
AT4G14540	56.5361	11.17	101.902	-3.18948	7.7e-17	4.76e-15	down	976	NFYB3	Nuclear transcription factor Y subunit B-3 [Source:UniProtKB/Swiss-Prot;Acc:O23310]
AT5G65165	23.8321	5.32245	42.3418	-2.99192	1.82e-05	0.000301809	down	1198	SDH2-3	Succinate dehydrogenase [ubiquinone] iron-sulfur subunit 3, mitochondrial [Source:UniProtKB/Swiss-Prot;Acc:Q9FJP9]
AT3G50350	1479.65	1096.41	1862.89	-0.764752	6.13e-05	0.000914143	down	740		Membrane insertase, putative (DUF1685) [Source:UniProtKB/TrEMBL;Acc:Q9SND2]
AT5G42310	248.437	112.508	384.365	-1.77245	7.91e-11	2.9e-09	down	2593	CRP1	Pentatricopeptide repeat-containing protein At5g42310, chloroplastic [Source:UniProtKB/Swiss-Prot;Acc:Q8L844]
AT3G04140	160.87	78.3313	243.408	-1.63572	1.28e-06	2.6e-05	down	2828		Ankyrin repeat family protein [Source:UniProtKB/TrEMBL;Acc:Q9M8X0]
AT2G37210	114.967	85.1681	144.766	-0.76534	0.00367707	0.0315725	down	1128		Cytokinin riboside 5'-monophosphate phosphoribohydrolase [Source:UniProtKB/TrEMBL;Acc:F4IQ18]
AT5G12270	288.129	196.728	379.53	-0.948008	3.32e-06	6.31e-05	down	1440		1-AMINOCYCLOPROPANE-1-CARBOXYLATE OXIDASE-like protein [Source:UniProtKB/TrEMBL;Acc:Q94CL5]
AT1G07110	1445.96	1119.45	1772.47	-0.662971	6.85e-05	0.00101187	down	2789	FKFBP	FKFBP [Source:UniProtKB/TrEMBL;Acc:A0A178W4F2]
AT5G50140	12.5707	5.13651	20.0049	-1.9615	0.00590754	0.0469525	down	1608		Ankyrin repeat family protein [Source:UniProtKB/TrEMBL;Acc:Q9FG97]
AT1G12370	450.215	166.711	733.719	-2.13787	2.5e-28	3.39e-26	down	1701	PHR1	Deoxyribodipyrimidine photo-lyase [Source:UniProtKB/Swiss-Prot;Acc:Q9SB00]
AT1G26770	264.989	87.3373	442.641	-2.34147	3.62e-27	4.69e-25	down	1172	ATEXPA10	Expansin [Source:UniProtKB/TrEMBL;Acc:F4HPC1]
AT3G23810	8676.67	3169.05	14184.3	-2.16217	4.35e-06	8.09e-05	down	1932	SAHH2	Adenosylhomocysteinase [Source:UniProtKB/TrEMBL;Acc:A0A178VEP9]
AT1G51820	55.1344	14.4752	95.7936	-2.72635	1.62e-06	3.25e-05	down	2802		Probable LRR receptor-like serine/threonine-protein kinase At1g51820 [Source:UniProtKB/Swiss-Prot;Acc:C0LGG3]
AT1G20340	453.829	16.3732	891.284	-5.76648	1.65e-114	6.88e-111	down	1347	DRT112	Plastocyanin major isoform, chloroplastic [Source:UniProtKB/Swiss-Prot;Acc:P42699]
AT3G16430	8102.81	6344.34	9861.29	-0.636306	0.00256112	0.023345	down	1311	PBP2	PYK10-binding protein 2 [Source:UniProtKB/Swiss-Prot;Acc:O04313]
AT3G23030	2177.58	1724.31	2630.86	-0.609516	0.000154728	0.00207621	down	1209	IAA2	Auxin-responsive protein [Source:UniProtKB/TrEMBL;Acc:A0A1I9LQ54]
AT1G79600	1277.56	841.548	1713.57	-1.02589	5.95e-08	1.51e-06	down	2541	ABC1K3	ABC1K3 [Source:UniProtKB/TrEMBL;Acc:A0A178WNJ7]
AT3G12345	150.908	66.3383	235.478	-1.82768	3.85e-10	1.32e-08	down	982		FKBP-type peptidyl-prolyl cis-trans isomerase [Source:UniProtKB/TrEMBL;Acc:Q9LHH3]
AT1G72140	759.227	602.611	915.844	-0.603874	0.00035382	0.00431064	down	1924	NPF5.12	Protein NRT1/ PTR FAMILY 5.12 [Source:UniProtKB/Swiss-Prot;Acc:Q9C7U1]
AT2G24090	367.258	228.2	506.316	-1.14974	3.75e-09	1.13e-07	down	859	RPL35	50S ribosomal protein L35, chloroplastic [Source:UniProtKB/Swiss-Prot;Acc:Q8VZ55]
AT3G57030	829.112	677.521	980.703	-0.533551	0.00199828	0.0188964	down	1839	SSL10	Protein STRICTOSIDINE SYNTHASE-LIKE 10 [Source:UniProtKB/Swiss-Prot;Acc:Q4V3D9]
AT4G35030	1066.21	837.922	1294.49	-0.627495	0.000122232	0.00167706	down	2068		Protein kinase superfamily protein [Source:UniProtKB/TrEMBL;Acc:F4JM74]
AT2G35370	171.033	25.112	316.954	-3.65782	1.5e-42	3.99e-40	down	944	GDH1	Glycine cleavage system H protein [Source:UniProtKB/TrEMBL;Acc:A0A178VV72]
AT1G32220	194.535	140.172	248.898	-0.828355	0.000149885	0.0020189	down	1452		Uncharacterized protein At1g32220, chloroplastic [Source:UniProtKB/Swiss-Prot;Acc:Q9FVR6]
AT3G15950	33024.4	25326.6	40722.1	-0.685158	0.00628804	0.0496631	down	2267	NAI2	TSA1-like protein [Source:UniProtKB/Swiss-Prot;Acc:Q9LSB4]
AT3G47650	137.56	39.6722	235.448	-2.56921	3.83e-22	3.54e-20	down	908		DnaJ/Hsp40 cysteine-rich domain superfamily protein [Source:UniProtKB/TrEMBL;Acc:Q9SN73]
AT2G23840	26.4594	4.53076	48.388	-3.41682	1.89e-09	5.96e-08	down	1350		At2g23840 [Source:UniProtKB/TrEMBL;Acc:Q6NMJ9]
AT1G64430	488.313	279.964	696.663	-1.31522	1.39e-07	3.32e-06	down	2020		Pentatricopeptide repeat (PPR) superfamily protein [Source:UniProtKB/TrEMBL;Acc:Q8VYZ8]
AT5G13140	115.502	72.0988	158.905	-1.14012	0.000467243	0.00544834	down	1142		Pollen Ole e 1 allergen and extensin family protein [Source:UniProtKB/TrEMBL;Acc:Q9FY96]
AT3G52610	120.583	89.1652	152.002	-0.769534	0.0027274	0.0246363	down	1662		GATA zinc finger protein [Source:UniProtKB/TrEMBL;Acc:Q8H1S5]
AT4G25830	93.4136	37.865	148.962	-1.97601	3.22e-09	9.82e-08	down	1349		CASP-like protein [Source:UniProtKB/TrEMBL;Acc:A0A178UTE2]
AT4G34020	379.329	276.177	482.481	-0.804876	0.00282492	0.0254253	down	1568	DJ1C	Protein DJ-1 homolog C [Source:UniProtKB/Swiss-Prot;Acc:Q8VY09]
AT1G06650	283.791	129.172	438.41	-1.76298	4.68e-07	1.04e-05	down	1406		1-aminocyclopropane-1-carboxylate oxidase homolog 3 [Source:UniProtKB/Swiss-Prot;Acc:Q8H1S4]
AT2G16400	1063.1	884.129	1242.07	-0.490413	0.00387764	0.0329554	down	2224	BLH7	BEL1-like homeodomain protein 7 [Source:UniProtKB/Swiss-Prot;Acc:Q9SIW1]
AT4G27520	1493.73	1124.83	1862.63	-0.727641	0.000408408	0.00487129	down	1846	ENODL2	Early nodulin-like protein 2 [Source:UniProtKB/Swiss-Prot;Acc:Q9T076]
AT1G48500	632.982	249.492	1016.47	-2.0265	2.66e-08	7.14e-07	down	1494	TIFY6A	Protein TIFY 6A [Source:UniProtKB/Swiss-Prot;Acc:Q58G47]
AT3G50440	3.92233	0	7.84466	#NAME?	0.00120248	0.012294	down	828	MES10	Methylesterase 10 [Source:UniProtKB/Swiss-Prot;Acc:Q8S9K8]
AT1G09420	166.056	116.456	215.656	-0.888948	0.00011177	0.00155483	down	2198	G6PD4	Glucose-6-phosphate 1-dehydrogenase [Source:UniProtKB/TrEMBL;Acc:F4I0Y8]
AT4G13290	1558.91	1015.98	2101.84	-1.04879	2.2e-08	5.95e-07	down	2336	CYP71A19	Cytochrome P450 71A19 [Source:UniProtKB/Swiss-Prot;Acc:Q9T0K0]
AT1G78140	474.05	250.114	697.986	-1.48061	4.01e-08	1.04e-06	down	1393		Uncharacterized methyltransferase At1g78140, chloroplastic [Source:UniProtKB/Swiss-Prot;Acc:Q8LBV4]
AT5G53170	1453.48	1111.92	1795.04	-0.690962	3.48e-05	0.000544028	down	2827	FTSH11	ATP-dependent zinc metalloprotease FTSH 11, chloroplastic/mitochondrial [Source:UniProtKB/Swiss-Prot;Acc:Q9FGM0]
AT4G14210	682.088	521.161	843.015	-0.693829	7.24e-05	0.00106063	down	2196	PDS	15-cis-phytoene desaturase, chloroplastic/chromoplastic [Source:UniProtKB/Swiss-Prot;Acc:Q07356]
AT1G59740	792.622	542.886	1042.36	-0.941129	0.00584729	0.0465617	down	2208	NPF4.3	Protein NRT1/ PTR FAMILY 4.3 [Source:UniProtKB/Swiss-Prot;Acc:Q93VV5]
AT2G40300	285.368	171.719	399.016	-1.2164	1.71e-08	4.74e-07	down	1252	FER4	Ferritin-4, chloroplastic [Source:UniProtKB/Swiss-Prot;Acc:Q9S756]
AT1G22740	457.287	343.046	571.529	-0.736427	6.18e-05	0.00092092	down	1059	RABG3B	Ras-related protein RABG3b [Source:UniProtKB/Swiss-Prot;Acc:O04157]
AT3G23400	668.888	391.474	946.302	-1.27338	8.17e-13	3.67e-11	down	1430	PAP6	Plastid-lipid-associated protein 6, chloroplastic [Source:UniProtKB/Swiss-Prot;Acc:Q9LW57]
AT5G01045	23.0072	0	46.0144	#NAME?	2.68e-08	7.2e-07	down	317
AT3G10405	53.6863	10.5519	96.8207	-3.19781	5.78e-09	1.7e-07	down	2331		At3g10405 [Source:UniProtKB/TrEMBL;Acc:A0JQ78]
AT1G21500	18.4238	0	36.8477	#NAME?	2.45e-14	1.25e-12	down	877		F24J8.11 protein [Source:UniProtKB/TrEMBL;Acc:Q9LPK9]
AT4G24350	33.8664	17.257	50.4759	-1.54842	0.00215995	0.0202112	down	1321		Phosphorylase superfamily protein [Source:UniProtKB/TrEMBL;Acc:Q94K59]
AT5G60120	1213.91	916.711	1511.11	-0.721066	1.02e-05	0.000176581	down	2427	TOE2	Target of early activation tagged (EAT) 2 [Source:UniProtKB/TrEMBL;Acc:F4JXG9]
AT5G61290	106.617	38.7199	174.515	-2.1722	5.26e-14	2.61e-12	down	1625		Flavin-containing monooxygenase FMO GS-OX-like 8 [Source:UniProtKB/Swiss-Prot;Acc:Q9FLK4]
AT2G23610	1265.94	1017.42	1514.47	-0.573891	0.000643222	0.00715034	down	1309	MES3	MES3 [Source:UniProtKB/TrEMBL;Acc:A0A178VT29]
AT3G15620	354.143	145.105	563.182	-1.95651	5.07e-12	2.1e-10	down	2113	UVR3	(6-4)DNA photolyase [Source:UniProtKB/Swiss-Prot;Acc:O48652]
AT1G68660	457.265	350.022	564.509	-0.68955	0.000284814	0.00356724	down	764	CPLS1	ATP-dependent Clp protease adapter protein CLPS1, chloroplastic [Source:UniProtKB/Swiss-Prot;Acc:Q9SX29]
AT1G76080	119.609	75.1426	164.076	-1.12666	0.000151264	0.00203628	down	1424	CDSP32	CDSP32 [Source:UniProtKB/TrEMBL;Acc:A0A178WHK1]
AT2G03750	6.4145	1.32615	11.5028	-3.11668	0.00388158	0.0329776	down	1488	SOT11	Sulfotransferase [Source:UniProtKB/TrEMBL;Acc:A0A178VL58]
AT3G09210	271.857	184.708	359.005	-0.958757	3.78e-06	7.11e-05	down	1354	PTAC13	AT3g09210/F3L24_8 [Source:UniProtKB/TrEMBL;Acc:Q94AA3]
AT1G27020	1538.56	850.618	2226.51	-1.3882	3.11e-15	1.71e-13	down	1529		Plant/protein [Source:UniProtKB/TrEMBL;Acc:O04551]
AT1G07010	35.3667	1.72179	69.0117	-5.32486	1.3e-15	7.38e-14	down	1573		Calcineurin-like metallo-phosphoesterase superfamily protein [Source:UniProtKB/TrEMBL;Acc:F4HNW0]
AT4G10060	23.2308	7.33671	39.1248	-2.41488	0.00129341	0.0130184	down	3172		Non-lysosomal glucosylceramidase [Source:UniProtKB/TrEMBL;Acc:F4JLJ2]
AT5G54040	879.149	632.479	1125.82	-0.831886	0.00118885	0.0121767	down	1791		CHP-rich zinc finger protein-like [Source:UniProtKB/TrEMBL;Acc:Q9FN23]
AT3G17470	265.139	150.843	379.435	-1.3308	0.000271572	0.00342885	down	1986	ATCRSH	Ca2+-activated RelA/spot-like protein [Source:UniProtKB/TrEMBL;Acc:A0A1I9LR76]
AT4G16250	754.201	627.496	880.907	-0.489383	0.0049768	0.0406133	down	4204	PHYD	Phytochrome D [Source:UniProtKB/Swiss-Prot;Acc:P42497]
AT1G69935	147.438	89.1121	205.764	-1.2073	3.77e-06	7.09e-05	down	1171	SHW1	Protein SHORT HYPOCOTYL IN WHITE LIGHT 1 [Source:UniProtKB/Swiss-Prot;Acc:F4I3V6]
AT1G29750	513.802	423.664	603.941	-0.511488	0.0056741	0.0454437	down	3580	RKF1	Probable LRR receptor-like serine/threonine-protein kinase RFK1 [Source:UniProtKB/Swiss-Prot;Acc:Q9FXF2]
AT3G17130	29.7415	0.967022	58.5161	-5.91914	6.17e-11	2.3e-09	down	944		Plant invertase/pectin methylesterase inhibitor superfamily protein [Source:UniProtKB/TrEMBL;Acc:Q9LSN4]
AT2G25940	295.86	231.624	360.097	-0.6366	0.0032741	0.0286636	down	1796	ALPHA-VPE	Vacuolar-processing enzyme alpha-isozyme [Source:UniProtKB/Swiss-Prot;Acc:P49047]
AT5G66470	303.407	199.293	407.52	-1.03198	2.18e-07	5.06e-06	down	1679		GTPase ERA-like, chloroplastic [Source:UniProtKB/Swiss-Prot;Acc:Q8VZ74]
AT1G19740	287.183	215.21	359.155	-0.738864	0.000344374	0.00421403	down	1214		ATP-dependent protease La (LON) domain protein [Source:UniProtKB/TrEMBL;Acc:Q9FXH3]
AT3G03980	219.533	171.686	267.38	-0.639116	0.00285964	0.0256272	down	1095		NADPH-dependent aldehyde reductase-like protein, chloroplastic [Source:UniProtKB/Swiss-Prot;Acc:Q9SQR4]
AT1G74970	501.159	294.246	708.071	-1.26687	8.21e-09	2.36e-07	down	1117	RPS9	30S ribosomal protein S9, chloroplastic [Source:UniProtKB/Swiss-Prot;Acc:Q9XJ27]
AT5G26570	1199.08	959.492	1438.68	-0.5844	0.000420301	0.00499647	down	3840	GWD3	Phosphoglucan, water dikinase, chloroplastic [Source:UniProtKB/Swiss-Prot;Acc:Q6ZY51]
AT2G05380	3189.76	1006.64	5372.89	-2.41616	8.63e-06	0.000151527	down	696	GRP3S	glycine-rich protein 3 short isoform [Source:TAIR;Acc:AT2G05380]
AT5G47610	7.46676	0.911844	14.0217	-3.94273	0.000306896	0.00379628	down	988	ATL79	At5g47610 [Source:UniProtKB/TrEMBL;Acc:Q1H5E6]
AT3G09390	2531.39	1487.16	3575.63	-1.26563	8.9e-15	4.72e-13	down	885	MT2A	Metallothionein-like protein 2A [Source:UniProtKB/Swiss-Prot;Acc:P25860]
AT1G10960	684.619	55.3432	1313.89	-4.5693	1.18e-44	3.52e-42	down	854	FD1	Ferredoxin-1, chloroplastic [Source:UniProtKB/Swiss-Prot;Acc:O04090]
AT3G21400	178.981	133.423	224.54	-0.75096	0.000554653	0.00628874	down	1041		Dynein beta chain, ciliary protein [Source:UniProtKB/TrEMBL;Acc:Q9LIF6]
AT5G04810	1399.82	760.291	2039.34	-1.42348	9.69e-06	0.00016905	down	3145	PPR4	Pentatricopeptide repeat-containing protein At5g04810, chloroplastic [Source:UniProtKB/Swiss-Prot;Acc:Q0WMY5]
AT1G64110	356.781	166.005	547.557	-1.72178	5.49e-09	1.62e-07	down	2825		p-loop containing nucleoside triphosphate hydrolases superfamily protein [Source:UniProtKB/TrEMBL;Acc:F4I5A3]
AT1G61190	79.4903	57.2941	101.686	-0.827668	0.00450028	0.0372108	down	3938		Probable disease resistance protein At1g61190 [Source:UniProtKB/Swiss-Prot;Acc:O22727]
AT4G18020	887.257	438.712	1335.8	-1.60636	3.78e-20	3.02e-18	down	2474	APRR2	Two-component response regulator-like APRR2 [Source:UniProtKB/Swiss-Prot;Acc:Q6LA43]
AT3G63190	569.224	442.847	695.6	-0.651449	0.000267632	0.00338594	down	1300	RRF	Ribosome-recycling factor, chloroplastic [Source:UniProtKB/Swiss-Prot;Acc:Q9M1X0]
AT5G41460	253.324	151.212	355.436	-1.23302	1.65e-07	3.86e-06	down	2093		At5g41460 [Source:UniProtKB/TrEMBL;Acc:Q9FN55]
AT3G22840	677.112	19.7518	1334.47	-6.07814	5.47e-07	1.2e-05	down	1035	ELIP1	ELIP1 [Source:UniProtKB/TrEMBL;Acc:A0A178VCA8]
AT3G18490	2168.28	1590.19	2746.37	-0.788327	0.000566489	0.00639108	down	2205	ASPG1	Protein ASPARTIC PROTEASE IN GUARD CELL 1 [Source:UniProtKB/Swiss-Prot;Acc:Q9LS40]
AT1G80300	1996.94	1690.25	2303.64	-0.446684	0.00533035	0.0430351	down	2616	AATP1	ADP,ATP carrier protein 1, chloroplastic [Source:UniProtKB/Swiss-Prot;Acc:Q39002]
AT4G03205	405.095	311.935	498.256	-0.67564	0.000481912	0.00560022	down	1572	hemf2	Coproporphyrinogen III oxidase [Source:TAIR;Acc:AT4G03205]
AT1G53060	68.4801	46.7299	90.2303	-0.949264	0.00366192	0.0314634	down	1108		Lectin-like protein At1g53060 [Source:UniProtKB/Swiss-Prot;Acc:Q9LNN1]
AT5G03860	74.7463	19.7709	129.722	-2.71397	2.31e-05	0.000375238	down	1964	MLS	Malate synthase [Source:UniProtKB/Swiss-Prot;Acc:Q9LZC3]
AT4G31115	242.725	193.302	292.148	-0.595843	0.00564382	0.0452882	down	1145		Protein of unknown function (DUF1997) [Source:TAIR;Acc:AT4G31115]
AT4G20760	146.998	106.558	187.438	-0.814772	0.000787879	0.00857547	down	1202		NAD(P)-binding Rossmann-fold superfamily protein [Source:TAIR;Acc:AT4G20760]
AT1G79110	265.12	204.631	325.61	-0.67012	0.000581787	0.00653713	down	1502	BRG2	Probable BOI-related E3 ubiquitin-protein ligase 2 [Source:UniProtKB/Swiss-Prot;Acc:F4IDI6]
AT1G78440	52.51	13.4992	91.5209	-2.76122	4.27e-07	9.55e-06	down	1311	GA2OX1	Gibberellin 2-beta-dioxygenase 1 [Source:UniProtKB/Swiss-Prot;Acc:Q8LEA2]
AT2G24190	181.989	35.8083	328.17	-3.19608	3.12e-37	6.67e-35	down	1138		NAD(P)-binding Rossmann-fold superfamily protein [Source:TAIR;Acc:AT2G24190]
AT1G78995	5.71764	0	11.4353	#NAME?	4.87e-05	0.000738933	down	1017		At1g78995 [Source:UniProtKB/TrEMBL;Acc:Q8L5A1]
AT1G44920	213.683	143.178	284.188	-0.989031	5.45e-06	9.98e-05	down	1138		T12C22.21 protein [Source:UniProtKB/TrEMBL;Acc:Q9LPD7]
AT2G47600	851.088	578.672	1123.5	-0.957188	3.19e-08	8.48e-07	down	2357	MHX	Magnesium/proton exchanger [Source:UniProtKB/Swiss-Prot;Acc:O22252]
AT3G07700	904.834	602.602	1207.07	-1.00223	1.35e-07	3.24e-06	down	2494		Protein kinase superfamily protein [Source:UniProtKB/TrEMBL;Acc:F4JFM1]
AT3G20110	448.229	307.69	588.768	-0.936225	1.35e-05	0.000229119	down	1951	CYP705A20	CYP705A20 [Source:UniProtKB/TrEMBL;Acc:A0A178V8F4]
AT1G76450	84.9297	50.5879	119.272	-1.23739	1.62e-05	0.000271418	down	946	PPD3	PsbP domain-containing protein 3, chloroplastic [Source:UniProtKB/Swiss-Prot;Acc:Q9S720]
AT5G54270	118.831	6.32639	231.335	-5.19246	6.42e-48	2.08e-45	down	1242	LHCB3	Chlorophyll a-b binding protein 3, chloroplastic [Source:UniProtKB/Swiss-Prot;Acc:Q9S7M0]
AT2G06520	438.994	51.4488	826.539	-4.00587	7.9e-74	6.58e-71	down	720	PSBX	PSBX [Source:UniProtKB/TrEMBL;Acc:A0A178W0Y5]
AT4G17370	370.415	292.384	448.446	-0.617071	0.0015111	0.0148684	down	1613		At4g17370 [Source:UniProtKB/TrEMBL;Acc:Q66GR2]
AT2G01990	371.209	276.043	466.376	-0.756601	0.000348922	0.00426135	down	1026		unknown protein; BEST Arabidopsis thaliana protein match is: unknown protein (TAIR:AT1G14630.1); Ha. [Source:TAIR;Acc:AT2G01990]
AT3G15850	317.06	202.856	431.265	-1.08812	3.99e-08	1.04e-06	down	1789	ADS3	JB67 [Source:UniProtKB/TrEMBL;Acc:A0A178VBZ6]
AT4G19985	98.1822	63.9233	132.441	-1.05094	0.000116913	0.00161292	down	1392		Acyl-CoA N-acyltransferases (NAT) superfamily protein [Source:TAIR;Acc:AT4G19985]
AT3G14810	604.717	361.531	847.903	-1.22978	0.00132224	0.0132447	down	3161	MSL5	Mechanosensitive ion channel protein 5 [Source:UniProtKB/Swiss-Prot;Acc:Q9LH74]
AT1G19570	12513.9	7987.66	17040.2	-1.0931	2.71e-12	1.16e-10	down	912	DHAR1	Glutathione S-transferase DHAR1, mitochondrial [Source:UniProtKB/Swiss-Prot;Acc:Q9FWR4]
AT5G56090	1391.53	1020.71	1762.35	-0.787936	1.48e-06	2.99e-05	down	1929	COX15	Cytochrome c oxidase assembly protein COX15 [Source:UniProtKB/Swiss-Prot;Acc:Q9FKT8]
AT4G08685	382.367	305.989	458.746	-0.584218	0.00206546	0.0194582	down	750	SAH7	SAH7 [Source:UniProtKB/TrEMBL;Acc:A0A178UVW6]
AT2G32440	403.214	313.812	492.616	-0.650561	0.0025735	0.0234237	down	1870	KAO2	Ent-kaurenoic acid oxidase 2 [Source:UniProtKB/Swiss-Prot;Acc:Q9C5Y2]
AT1G03160	395.452	315.854	475.049	-0.588816	0.00166661	0.0161885	down	2899	FZL	Probable transmembrane GTPase FZO-like, chloroplastic [Source:UniProtKB/Swiss-Prot;Acc:Q1KPV0]
AT4G30470	1141.55	726.523	1556.59	-1.09931	0.00197174	0.0186737	down	1440		Cinnamoyl-CoA reductase-like protein [Source:UniProtKB/TrEMBL;Acc:Q9M0B3]
AT5G27810	7.41563	0.708921	14.1223	-4.31621	0.000106007	0.0014854	down	788		At5g27810 [Source:UniProtKB/TrEMBL;Acc:Q3E8Z9]
AT5G39530	71.5617	18.6842	124.439	-2.73555	4.05e-16	2.4e-14	down	1549		Uncharacterized protein At5g39530/MUL8_210 [Source:UniProtKB/TrEMBL;Acc:Q8GWM5]
AT1G62030	21.7549	3.9861	39.5236	-3.30967	8.58e-09	2.46e-07	down	2587		Cysteine/Histidine-rich C1 domain family protein [Source:UniProtKB/TrEMBL;Acc:O80707]
AT1G72030	25.6032	0.303948	50.9025	-7.38777	8.08e-14	3.93e-12	down	933		Acyl-CoA N-acyltransferases (NAT) superfamily protein [Source:UniProtKB/TrEMBL;Acc:Q9C7G6]
AT5G53880	317.137	226.141	408.134	-0.851819	1.37e-05	0.000231884	down	754		Putative uncharacterized protein [Source:UniProtKB/TrEMBL;Acc:Q9FN38]
AT5G60600	1294.93	1093.57	1496.28	-0.452331	0.00583096	0.0464767	down	2820	ISPG	4-hydroxy-3-methylbut-2-en-1-yl diphosphate synthase (ferredoxin), chloroplastic [Source:UniProtKB/Swiss-Prot;Acc:F4K0E8]
AT3G54360	1787.9	1507.62	2068.17	-0.456081	0.00543272	0.0437768	down	1651	NCA1	Protein NCA1 [Source:UniProtKB/Swiss-Prot;Acc:Q9M2V1]
AT2G02400	439.605	266.471	612.739	-1.20129	2.49e-10	8.73e-09	down	1418		NAD(P)-binding Rossmann-fold superfamily protein [Source:UniProtKB/TrEMBL;Acc:Q9ZVQ2]
AT4G39510	128.55	48.1495	208.95	-2.11757	4.96e-16	2.91e-14	down	2014	CYP96A12	CYP96A12 [Source:UniProtKB/TrEMBL;Acc:A0A178V036]
AT3G21055	183.304	3.86809	362.741	-6.55117	7.8e-79	7.8e-76	down	673	PSBTN	Photosystem II subunit T [Source:UniProtKB/TrEMBL;Acc:A0A1I9LS90]
AT5G04440	780.833	587.222	974.444	-0.730674	2.61e-05	0.000419388	down	1544		At5g04440 [Source:UniProtKB/TrEMBL;Acc:Q500X2]
AT1G64500	158.47	17.8462	299.095	-4.06691	2.19e-25	2.52e-23	down	1512		F1N19.7 [Source:UniProtKB/TrEMBL;Acc:Q9SGW5]
AT3G27380	3997.7	3227.41	4767.99	-0.563002	0.000264473	0.00335107	down	2535	SDH2-1	Succinate dehydrogenase [ubiquinone] iron-sulfur subunit 1, mitochondrial [Source:UniProtKB/Swiss-Prot;Acc:Q8LBZ7]
AT2G20890	703.19	396.472	1009.91	-1.34893	2.18e-14	1.12e-12	down	1333	THF1	THF1 [Source:UniProtKB/TrEMBL;Acc:A0A178VVV5]
AT5G08260	1069.69	797.584	1341.8	-0.75046	8.95e-06	0.000156891	down	1790	SCPL35	Serine carboxypeptidase-like 35 [Source:UniProtKB/Swiss-Prot;Acc:Q9LEY1]
AT5G57785	659.917	23.279	1296.56	-5.79951	4.19e-35	8.26e-33	down	874		At5g57785 [Source:UniProtKB/TrEMBL;Acc:Q8GY06]
AT3G18080	845.614	661.646	1029.58	-0.637926	0.00520373	0.0420944	down	1992	BGLU44	Beta-glucosidase 44 [Source:UniProtKB/Swiss-Prot;Acc:Q9LV33]
AT1G44575	294.724	2.43071	587.017	-7.91588	3.43e-33	5.92e-31	down	1346	PSBS	Photosystem II 22 kDa protein, chloroplastic [Source:UniProtKB/Swiss-Prot;Acc:Q9XF91]
AT5G59770	350.264	234.635	465.893	-0.989582	4.04e-07	9.08e-06	down	1032		Very-long-chain (3R)-3-hydroxyacyl-CoA dehydratase [Source:UniProtKB/TrEMBL;Acc:Q8GW27]
AT1G55320	1573.52	691.658	2455.39	-1.82782	1.43e-22	1.36e-20	down	2560	AAE18	AAE18 [Source:UniProtKB/TrEMBL;Acc:A0A178WMT3]
AT5G54600	640.726	389.619	891.833	-1.19471	4.14e-11	1.56e-09	down	889	RPL24	SVR8 [Source:UniProtKB/TrEMBL;Acc:A0A178U954]
AT5G53370	961.081	562.524	1359.64	-1.27324	1.88e-13	8.96e-12	down	1979	ATPMEPCRF	pectin methylesterase PCR fragment F [Source:TAIR;Acc:AT5G53370]
AT3G30180	489.369	386.471	592.267	-0.615886	0.000559424	0.0063285	down	1913	CYP85A2	Cytochrome P450 85A2 [Source:UniProtKB/Swiss-Prot;Acc:Q940V4]
AT5G11790	2518.4	1705.64	3331.16	-0.965713	1.32e-09	4.24e-08	down	2378	NDL2	Protein NDL2 [Source:UniProtKB/Swiss-Prot;Acc:Q9ASU8]
AT2G47910	111.331	72.9771	149.684	-1.03641	0.000101986	0.00143711	down	1120	CRR6	Protein CHLORORESPIRATORY REDUCTION 6, chloroplastic [Source:UniProtKB/Swiss-Prot;Acc:O82258]
AT1G68500	118.208	52.578	183.838	-1.80591	6.76e-12	2.77e-10	down	1009		Uncharacterized protein At1g68500 [Source:UniProtKB/TrEMBL;Acc:Q84K42]
AT2G40490	646.133	510.349	781.916	-0.61553	0.00045535	0.00532547	down	1555	HEME2	Uroporphyrinogen decarboxylase 2, chloroplastic [Source:UniProtKB/Swiss-Prot;Acc:O22886]
AT1G78820	34.3491	18.2401	50.4581	-1.46797	0.00028967	0.00361719	down	1836		EP1-like glycoprotein 1 [Source:UniProtKB/Swiss-Prot;Acc:Q9ZVA1]
AT1G64290	7.7524	0.635485	14.8693	-4.54834	6.36e-05	0.000946152	down	1367		F-box protein-like protein [Source:UniProtKB/TrEMBL;Acc:Q9C7V3]
AT3G20680	53.5641	9.96356	97.1647	-3.2857	0.000375951	0.00453607	down	1127		AT3g20680/F3H11_7 [Source:UniProtKB/TrEMBL;Acc:Q9LHQ4]
AT2G43560	128.153	63.0675	193.239	-1.61542	2.6e-10	9.05e-09	down	1017	FKBP16-3	Peptidylprolyl isomerase [Source:UniProtKB/TrEMBL;Acc:A0A178VVY6]
AT4G01150	459.364	183.844	734.884	-1.99903	4.51e-25	5.06e-23	down	884	CURT1A	Protein CURVATURE THYLAKOID 1A, chloroplastic [Source:UniProtKB/Swiss-Prot;Acc:O04616]
AT3G25480	158.985	96.547	221.422	-1.1975	3.67e-07	8.32e-06	down	1188	STR4A	Rhodanese-like domain-containing protein 4A, chloroplastic [Source:UniProtKB/Swiss-Prot;Acc:Q56XR7]
AT1G53800	158.752	115.092	202.411	-0.814499	0.000369068	0.00446596	down	1961		AT1G53800 protein [Source:UniProtKB/TrEMBL;Acc:B9DHC9]
AT5G14370	363.359	173.864	552.854	-1.66894	4.83e-17	3.03e-15	down	1550		CCT motif family protein [Source:UniProtKB/TrEMBL;Acc:Q949T9]
AT3G56290	303.446	7.25609	599.635	-6.36875	5.86e-12	2.42e-10	down	1061		Potassium transporter [Source:UniProtKB/TrEMBL;Acc:Q9LYL4]
AT5G22740	5569.94	4652.68	6487.21	-0.479536	0.00281547	0.0253585	down	2619	CSLA2	Glycosyltransferase (Fragment) [Source:UniProtKB/TrEMBL;Acc:W8PUD8]
AT1G60270	477.303	136.912	817.693	-2.57831	7.93e-14	3.87e-12	down	1735	BGLU6	Putative beta-glucosidase 6 [Source:UniProtKB/Swiss-Prot;Acc:Q682B4]
AT5G36170	534.175	415.879	652.471	-0.649749	0.000381689	0.00459644	down	1671	PRFB1	Peptide chain release factor PrfB1, chloroplastic [Source:UniProtKB/Swiss-Prot;Acc:Q9LVY0]
AT1G59700	121.73	57.7348	185.726	-1.68566	6.61e-09	1.92e-07	down	1124	GSTU16	Glutathione S-transferase U16 [Source:UniProtKB/Swiss-Prot;Acc:Q9XIF8]
AT5G44130	297.793	168.676	426.91	-1.33967	1.92e-05	0.000315845	down	1225	FLA13	Fasciclin-like arabinogalactan protein 13 [Source:UniProtKB/Swiss-Prot;Acc:Q9FFH6]
AT4G04340	2251.09	1733.11	2769.07	-0.676036	2.62e-05	0.000420699	down	2981	OSCA1	Protein OSCA1 [Source:UniProtKB/Swiss-Prot;Acc:Q9XEA1]
AT5G01920	507.702	276.149	739.256	-1.42063	3.18e-08	8.44e-07	down	1751	STN8	Serine/threonine-protein kinase STN8, chloroplastic [Source:UniProtKB/Swiss-Prot;Acc:Q9LZV4]
AT2G03240	1419.62	1089.25	1749.99	-0.684018	3.19e-05	0.00050265	down	3603	PHO1-H5	Phosphate transporter PHO1 homolog 5 [Source:UniProtKB/Swiss-Prot;Acc:Q6R8G5]
AT1G76790	4886.96	3885.05	5888.88	-0.600061	0.000791947	0.00860477	down	1370	IGMT5	Indole glucosinolate O-methyltransferase 5 [Source:UniProtKB/Swiss-Prot;Acc:Q9SRD4]
AT4G37780	66.2644	38.7195	93.8092	-1.27667	4.81e-05	0.000731625	down	1310	MYB87	Transcription factor MYB87 [Source:UniProtKB/Swiss-Prot;Acc:F4JSU0]
AT1G64150	58.2217	19.4483	96.995	-2.31827	4.99e-11	1.87e-09	down	1471	PAM71	Protein PAM71, chloroplastic [Source:UniProtKB/Swiss-Prot;Acc:Q94AX5]
AT1G65820	5203.64	4002.5	6404.77	-0.678245	1.27e-05	0.000216635	down	866		Microsomal glutathione s-transferase [Source:UniProtKB/TrEMBL;Acc:F4IBL0]
AT3G21560	1832.69	38.197	3627.18	-6.56925	7.95e-12	3.23e-10	down	1928	UGT84A2	UGT84A2 [Source:UniProtKB/TrEMBL;Acc:A0A384L2P1]
AT5G03555	795.098	408.365	1181.83	-1.53309	1.41e-18	1.01e-16	down	2134	NCS1	Purine-uracil permease NCS1 [Source:UniProtKB/Swiss-Prot;Acc:Q9LZD0]
AT3G25690	379.092	296.41	461.775	-0.639593	0.000665947	0.00738	down	3628	CHUP1	Hydroxyproline-rich glycoprotein family protein [Source:UniProtKB/TrEMBL;Acc:A0A1I9LT48]
AT2G23340	1043.27	822.039	1264.49	-0.621282	0.000332987	0.00409473	down	1206	ERF008	Ethylene-responsive transcription factor ERF008 [Source:UniProtKB/Swiss-Prot;Acc:O22174]
AT3G18890	125.841	78.0296	173.653	-1.15411	0.000838479	0.00903578	down	2492	TIC62	Protein TIC 62, chloroplastic [Source:UniProtKB/Swiss-Prot;Acc:Q8H0U5]
AT4G27440	661.517	36.2518	1286.78	-5.14957	3.7e-53	1.65e-50	down	1543	PORB	Protochlorophyllide reductase B, chloroplastic [Source:UniProtKB/Swiss-Prot;Acc:P21218]
AT3G06483	405.575	329.38	481.77	-0.548591	0.00346498	0.0300335	down	1762	PDK	[Pyruvate dehydrogenase (acetyl-transferring)] kinase, mitochondrial [Source:UniProtKB/Swiss-Prot;Acc:Q9SBJ1]
AT3G14280	1535.23	1142.17	1928.3	-0.755548	0.00603949	0.0478995	down	819		At3g14280 [Source:UniProtKB/TrEMBL;Acc:Q9LUL9]
AT3G21720	89.0934	60.7903	117.396	-0.949474	0.000520727	0.00595267	down	2213	ICL	Isocitrate lyase [Source:UniProtKB/Swiss-Prot;Acc:P28297]
AT5G03940	707.65	397.186	1018.11	-1.35801	2.52e-14	1.28e-12	down	2022	FFC	SRP54CP [Source:UniProtKB/TrEMBL;Acc:A0A178UD49]
AT2G38140	371.64	221.9	521.381	-1.23243	2.16e-10	7.62e-09	down	610	RPS31	30S ribosomal protein S31, chloroplastic [Source:UniProtKB/Swiss-Prot;Acc:O80439]
AT5G10100	617.967	210.246	1025.69	-2.28644	1.43e-05	0.000241067	down	1487	TPPI	Trehalose 6-phosphate phosphatase [Source:UniProtKB/TrEMBL;Acc:A0A178UDH6]
AT5G50920	9191.66	7148.4	11234.9	-0.6523	0.00133799	0.0133616	down	3512	CLPC1	Chaperone protein ClpC1, chloroplastic [Source:UniProtKB/Swiss-Prot;Acc:Q9FI56]
AT2G37220	3109.48	1958.9	4260.07	-1.12083	4.79e-12	1.99e-10	down	1488	CP29B	RNA-binding protein CP29B, chloroplastic [Source:UniProtKB/Swiss-Prot;Acc:Q9ZUU4]
AT5G21280	174.942	60.9043	288.98	-2.24635	8.52e-21	7.13e-19	down	1720		At5g21280 [Source:UniProtKB/TrEMBL;Acc:Q9C589]
AT5G23730	304.068	155.445	452.691	-1.54212	2.82e-11	1.08e-09	down	1534	RUP2	WD repeat-containing protein RUP2 [Source:UniProtKB/Swiss-Prot;Acc:Q9FFA7]
AT5G43470	136.286	16.2899	256.282	-3.97568	2.39e-41	6.04e-39	down	3486	RPP8	Disease resistance protein RPP8 [Source:UniProtKB/Swiss-Prot;Acc:Q8W4J9]
AT1G77090	45.4627	12.4962	78.4292	-2.64991	3.53e-11	1.33e-09	down	1146	PPD4	PsbP domain-containing protein 4, chloroplastic [Source:UniProtKB/Swiss-Prot;Acc:O49292]
AT1G66980	21.1729	6.97973	35.366	-2.34112	1.83e-05	0.000303601	down	3932	SNC4	suppressor of npr1-1 constitutive 4 [Source:TAIR;Acc:AT1G66980]
AT1G65670	27.1222	13.9497	40.2948	-1.53036	0.000865265	0.0092924	down	1723	CYP702A1	Cytochrome P450 family protein [Source:UniProtKB/TrEMBL;Acc:Q1PFG4]
AT5G66690	10648	7695.4	13600.6	-0.821599	0.00120276	0.012294	down	1774	UGT72E2	Glycosyltransferase (Fragment) [Source:UniProtKB/TrEMBL;Acc:W8PUV8]
AT1G60000	102.896	11.7881	194.004	-4.04068	8.95e-16	5.15e-14	down	908		AT1G60000 protein [Source:UniProtKB/TrEMBL;Acc:Q9ZUJ3]
AT5G13650	2339	1312.68	3365.32	-1.35823	1.06e-14	5.6e-13	down	2516		Elongation factor family protein [Source:UniProtKB/TrEMBL;Acc:F4K409]
AT4G34620	1183.47	736.152	1630.79	-1.1475	1.03e-11	4.16e-10	down	703	RPS16-1	SSR16 [Source:UniProtKB/TrEMBL;Acc:A0A178UZA3]
AT3G62550	8.89059	0.607896	17.1733	-4.8202	9.64e-05	0.00136852	down	1152		Adenine nucleotide alpha hydrolases-like superfamily protein [Source:UniProtKB/TrEMBL;Acc:Q93W91]
AT1G14240	1197.16	916.527	1477.8	-0.689204	5.2e-05	0.00078454	down	1821	APY3	Probable apyrase 3 [Source:UniProtKB/Swiss-Prot;Acc:Q9XI62]
AT3G16400	35216.3	26888.5	43544	-0.695486	0.000910751	0.00973491	down	1863	NSP1	Nitrile-specifier protein 1 [Source:UniProtKB/Swiss-Prot;Acc:Q9SDM9]
AT1G78070	1045.58	673.784	1417.37	-1.07286	0.000452498	0.00530095	down	2073		At1g78070/F28K19_28 [Source:UniProtKB/TrEMBL;Acc:Q94JT6]
AT2G33585	253.44	203.732	303.148	-0.573347	0.00390437	0.0331487	down	810		unknown protein; Ha. [Source:TAIR;Acc:AT2G33585]
AT2G29650	78.0882	47.4508	108.726	-1.19619	5.46e-05	0.000822324	down	1970	ANTR1	Sodium-dependent phosphate transport protein 1, chloroplastic [Source:UniProtKB/Swiss-Prot;Acc:O82390]
AT4G34138	2197.47	898.277	3496.66	-1.96074	0.000512208	0.00586869	down	2082	UGT73B1	Glycosyltransferase (Fragment) [Source:UniProtKB/TrEMBL;Acc:W8PUI6]
AT4G13100	616.005	493.294	738.717	-0.582574	0.0011664	0.0119811	down	1179		RING/U-box superfamily protein [Source:UniProtKB/TrEMBL;Acc:F4JS86]
AT1G70200	269.413	201.963	336.862	-0.738068	0.00033581	0.00412741	down	2021		RNA-binding (RRM/RBD/RNP motifs) family protein [Source:UniProtKB/TrEMBL;Acc:Q84JK1]
AT3G06145	100.561	74.4565	126.665	-0.766552	0.00387323	0.032929	down	976		Putative RING zinc finger protein [Source:UniProtKB/TrEMBL;Acc:Q56XV3]
AT2G31560	115.756	75.3874	156.125	-1.05031	3.8e-05	0.000590738	down	1197		AT2G31560 protein [Source:UniProtKB/TrEMBL;Acc:Q8VZ71]
AT1G33590	1702.95	1427.06	1978.84	-0.471604	0.00425125	0.0354817	down	1889		Leucine-rich repeat (LRR) family protein [Source:TAIR;Acc:AT1G33590]
AT5G10730	797.169	626.519	967.819	-0.627379	0.000225572	0.00290077	down	1316		AT5g10730/MAJ23_90 [Source:UniProtKB/TrEMBL;Acc:Q93VH5]
AT3G08660	41.7149	15.6426	67.7871	-2.11553	4.39e-08	1.13e-06	down	2129		Putative BTB/POZ domain-containing protein At3g08660 [Source:UniProtKB/Swiss-Prot;Acc:Q9C9Z0]
AT1G32990	355.353	242.383	468.323	-0.950218	8.6e-07	1.82e-05	down	1103	RPL11	50S ribosomal protein L11, chloroplastic [Source:UniProtKB/Swiss-Prot;Acc:Q9MAP3]
AT5G17170	96.5416	0.663074	192.42	-8.18087	2.41e-56	1.2e-53	down	1232	ENH1	Rubredoxin family protein [Source:UniProtKB/TrEMBL;Acc:Q9FFJ2]
AT4G02280	1231.04	797.34	1664.74	-1.06203	1.03e-08	2.91e-07	down	3142	SUS3	Sucrose synthase (Fragment) [Source:UniProtKB/TrEMBL;Acc:W8Q6L8]
AT5G65840	430.761	208.123	653.399	-1.65053	1.5e-11	5.95e-10	down	1263		Thioredoxin superfamily protein [Source:UniProtKB/TrEMBL;Acc:Q8L5Y8]
AT4G05100	122.446	74.7066	170.185	-1.18779	3.76e-06	7.08e-05	down	1317	AtMYB74	Transcription factor MYB74 [Source:UniProtKB/Swiss-Prot;Acc:Q9M0Y5]
AT4G34350	2457.21	1784.64	3129.78	-0.810429	0.00357147	0.0308033	down	1781	ISPH	4-hydroxy-3-methylbut-2-enyl diphosphate reductase, chloroplastic [Source:UniProtKB/Swiss-Prot;Acc:Q94B35]
AT4G04850	519.833	95.4076	944.258	-3.30701	2.39e-31	3.76e-29	down	3009	KEA3	K(+) efflux antiporter 3, chloroplastic [Source:UniProtKB/Swiss-Prot;Acc:Q9M0Z3]
AT5G43780	9789.29	8180.47	11398.1	-0.478541	0.00208607	0.0196154	down	1904	APS4	ATP sulfurylase 4, chloroplastic [Source:UniProtKB/Swiss-Prot;Acc:Q9S7D8]
AT5G14660	140.333	106.207	174.46	-0.716025	0.00291523	0.0260135	down	1156	PDF1B	Peptide deformylase 1B, chloroplastic/mitochondrial [Source:UniProtKB/Swiss-Prot;Acc:Q9FUZ2]
AT1G28140	446.978	330.426	563.529	-0.770161	2.54e-05	0.000410334	down	2116		F3H9.20 protein [Source:UniProtKB/TrEMBL;Acc:Q9FZ88]
AT3G63410	1102.73	690.898	1514.56	-1.13235	2.17e-11	8.36e-10	down	1361	VTE3	2-methyl-6-phytyl-1,4-hydroquinone methyltransferase, chloroplastic [Source:UniProtKB/Swiss-Prot;Acc:Q9LY74]
AT2G16430	988.794	747.575	1230.01	-0.718381	0.000226072	0.00290421	down	1738	PAP10	Purple acid phosphatase [Source:UniProtKB/TrEMBL;Acc:A0A178VZQ7]
AT3G50410	123.04	80.8046	165.276	-1.03236	0.000184082	0.00242202	down	1224	DOF3.4	OBP1 [Source:UniProtKB/TrEMBL;Acc:A0A178VFT5]
AT1G03010	169.774	209.646	129.901	0.690539	0.00231145	0.0214284	up	2313		BTB/POZ domain-containing protein At1g03010 [Source:UniProtKB/Swiss-Prot;Acc:Q9SA69]
AT3G56710	72.5649	109.224	35.9062	1.60498	2.71994e-07	6.26438e-06	up	1327	SIB1	SIB1 [Source:UniProtKB/TrEMBL;Acc:A0A178VMX5]
AT1G74360	687.719	1002	373.442	1.42392	1.10944e-15	6.34997e-14	up	3694		Probable LRR receptor-like serine/threonine-protein kinase At1g74360 [Source:UniProtKB/Swiss-Prot;Acc:C0LGJ1]
AT2G19710	900.706	1085.57	715.847	0.600722	0.000589951	0.00661995	up	3287		Regulator of Vps4 activity in the MVB pathway protein [Source:UniProtKB/TrEMBL;Acc:F4ITF9]
AT3G45700	376.807	445.111	308.504	0.528876	0.00529862	0.0428204	up	1899	NPF2.4	Protein NRT1/ PTR FAMILY 2.4 [Source:UniProtKB/Swiss-Prot;Acc:Q9M173]
AT2G35710	348.842	450.24	247.444	0.86359	0.00173024	0.0167027	up	1829	PGSIP8	Putative glucuronosyltransferase PGSIP8 [Source:UniProtKB/Swiss-Prot;Acc:Q8VZP6]
AT1G49450	1028.64	1258.57	798.708	0.656046	0.00027867	0.00350432	up	2113		F13F21.11 protein [Source:UniProtKB/TrEMBL;Acc:Q9XIB2]
AT5G14780	1359.26	1819.18	899.329	1.01637	0.00105211	0.0109922	up	2033	FDH1	Formate dehydrogenase, mitochondrial [Source:UniProtKB/TrEMBL;Acc:A0A178UHK7]
AT3G29410	1796.29	2696.27	896.298	1.58892	6.54848e-08	1.65112e-06	up	2104	TPS25	Terpenoid synthase 25 [Source:UniProtKB/Swiss-Prot;Acc:Q9LIA1]
AT3G57450	651.746	810.857	492.635	0.71893	0.00324354	0.0284358	up	1718		At3g57450 [Source:UniProtKB/TrEMBL;Acc:Q9SCM7]
AT1G73805	98.1784	180.009	16.3476	3.46092	5.73326e-23	5.53669e-21	up	2397	SARD1	Protein SAR DEFICIENT 1 [Source:UniProtKB/Swiss-Prot;Acc:Q9C9T2]
AT5G09290	439.713	781.364	98.0616	2.99424	5.79026e-49	2.01147e-46	up	1301	SAL4	3'(2'),5'-bisphosphate nucleotidase-like protein [Source:UniProtKB/TrEMBL;Acc:Q0WTK9]
AT3G50480	405.424	651.496	159.353	2.03153	9.91018e-25	1.07771e-22	up	998	HR4	RPW8-like protein 4 [Source:UniProtKB/Swiss-Prot;Acc:Q9SCS6]
AT3G20860	905.175	1080.38	729.969	0.565633	0.00104257	0.0109107	up	1251	NEK6	Serine/threonine-protein kinase Nek6 [Source:UniProtKB/Swiss-Prot;Acc:Q9LT35]
AT3G27070	190.186	270.841	109.531	1.30611	5.13587e-09	1.51842e-07	up	942	TOM20-1	Translocase outer membrane 20-1 [Source:UniProtKB/TrEMBL;Acc:F4JEW8]
AT1G74710	329.647	422.985	236.308	0.839935	1.859e-05	0.000307318	up	2102	EDS16	ADC synthase superfamily protein [Source:TAIR;Acc:AT1G74710]
AT3G10986	35.6933	53.6901	17.6964	1.6012	0.000126782	0.00173472	up	820		Protein LURP-one-related 9 [Source:UniProtKB/Swiss-Prot;Acc:B3H5L1]
AT5G01820	2439.52	2949.4	1929.64	0.612089	0.000139542	0.00189481	up	2216	CIPK14	CBL-interacting serine/threonine-protein kinase 14 [Source:UniProtKB/Swiss-Prot;Acc:Q9LZW4]
AT2G16970	340.965	424.258	257.672	0.719406	0.000216704	0.00279103	up	1475	MEE15	Major facilitator superfamily protein [Source:TAIR;Acc:AT2G16970]
AT1G03730	590.936	729.625	452.248	0.690042	0.000129151	0.00176136	up	1271		At1g03730 [Source:UniProtKB/TrEMBL;Acc:Q1ECK0]
AT2G36255	130.364	220.932	39.7959	2.47291	3.16409e-05	0.000498993	up	496		Putative defensin-like protein 203 [Source:UniProtKB/Swiss-Prot;Acc:Q2V424]
AT3G05937	288.331	342.167	234.495	0.545142	0.00566888	0.0454164	up	1075		unknown protein; Ha. [Source:TAIR;Acc:AT3G05937]
AT2G30670	22.4715	44.5861	0.356807	6.96531	5.09064e-06	9.36229e-05	up	1027		Tropinone reductase homolog At2g30670 [Source:UniProtKB/Swiss-Prot;Acc:O49332]
AT1G78360	142.94	204.49	81.3909	1.32909	2.22867e-07	5.17101e-06	up	907	ATGSTU21	glutathione S-transferase TAU 21 [Source:TAIR;Acc:AT1G78360]
AT3G55090	480.565	778.728	182.403	2.09399	1.6765e-05	0.000280111	up	2728	ABCG16	ABC transporter G family member 16 [Source:UniProtKB/Swiss-Prot;Acc:Q9M2V7]
AT4G35985	765.554	907.702	623.406	0.542046	0.00201245	0.0190232	up	1868	P85	Senescence/dehydration-associated protein At4g35985, chloroplastic [Source:UniProtKB/Swiss-Prot;Acc:F4JNX2]
AT5G39150	35.8917	57.7615	14.0219	2.04242	1.5357e-06	3.08274e-05	up	891		Germin-like protein subfamily 1 member 17 [Source:UniProtKB/Swiss-Prot;Acc:Q9FIC6]
AT1G16130	238.148	304.931	171.365	0.831412	5.66471e-05	0.000848925	up	2753	WAKL2	Wall-associated receptor kinase-like 2 [Source:UniProtKB/Swiss-Prot;Acc:Q7X8C5]
AT2G19500	65.9751	109.214	22.7362	2.26409	1.44922e-07	3.44235e-06	up	1667	CKX2	Cytokinin dehydrogenase 2 [Source:UniProtKB/Swiss-Prot;Acc:Q9FUJ3]
AT1G80840	157.463	256.981	57.9448	2.14891	0.00188064	0.0179399	up	1325	WRKY40	Probable WRKY transcription factor 40 [Source:UniProtKB/Swiss-Prot;Acc:Q9SAH7]
AT2G21880	342.744	467.533	217.955	1.10104	2.16888e-08	5.87099e-07	up	1025	RABG2	RAB7A [Source:UniProtKB/TrEMBL;Acc:A0A178VZI8]
AT3G01760	126.446	184.624	68.2671	1.43533	2.79885e-06	5.39329e-05	up	1453		Lysine histidine transporter-like 4 [Source:UniProtKB/Swiss-Prot;Acc:Q9SS86]
AT4G13180	5752.39	6705.98	4798.8	0.482773	0.00239124	0.0220375	up	1209		AT4g13180/F17N18_70 [Source:UniProtKB/TrEMBL;Acc:Q9SVQ9]
AT2G17120	1005.82	1214.57	797.076	0.607659	0.000293467	0.0036573	up	1450	LYM2	LysM domain-containing GPI-anchored protein 2 [Source:UniProtKB/Swiss-Prot;Acc:O23006]
AT2G32160	35.2672	65.0035	5.53096	3.55492	0.0013671	0.0136122	up	1583		AT2G32160 protein [Source:UniProtKB/TrEMBL;Acc:B3H6T0]
AT5G55560	430.159	512.012	348.306	0.555823	0.00300821	0.0266813	up	1328	WNK11	Probable serine/threonine-protein kinase WNK11 [Source:UniProtKB/Swiss-Prot;Acc:Q6ICW6]
AT1G62280	774.912	995.289	554.534	0.843841	0.00345441	0.0299902	up	1493	SLAH1	SLAH1 [Source:UniProtKB/TrEMBL;Acc:A0A178W8P4]
AT2G04400	1557.85	1986.81	1128.89	0.815545	1.06649e-06	2.21186e-05	up	1428	IGPS	Indole-3-glycerol phosphate synthase, chloroplastic [Source:UniProtKB/Swiss-Prot;Acc:P49572]
AT5G11180	20.5523	36.0201	5.08459	2.8246	5.84971e-05	0.000874555	up	2824	GLR2.6	Glutamate receptor 2.6 [Source:UniProtKB/Swiss-Prot;Acc:Q9LFN8]
AT1G17147	588.909	769.264	408.554	0.912953	7.77831e-05	0.00113045	up	951	VQ1	VQ motif-containing protein 1 [Source:UniProtKB/Swiss-Prot;Acc:Q1G3U8]
AT1G62380	8052.7	10506	5599.36	0.907884	2.08606e-08	5.6652e-07	up	1452	ACO2	1-aminocyclopropane-1-carboxylate oxidase 2 [Source:UniProtKB/Swiss-Prot;Acc:Q41931]
AT5G17720	5.60345	10.8835	0.323436	5.07251	0.000406125	0.00484637	up	1332	BDG5	Probable lysophospholipase BODYGUARD 5 [Source:UniProtKB/Swiss-Prot;Acc:Q9FN79]
AT2G16380	256.149	388.523	123.775	1.65028	0.000944006	0.0100261	up	2026	SFH7	Phosphatidylinositol/phosphatidylcholine transfer protein SFH7 [Source:UniProtKB/Swiss-Prot;Acc:Q9SIW3]
AT2G46740	2523.87	3014.72	2033.02	0.568395	0.000452696	0.00530095	up	1951	GULLO5	GulLO5 [Source:UniProtKB/TrEMBL;Acc:A0A178VXG4]
AT3G20360	45.9882	68.649	23.3275	1.55721	7.01537e-05	0.00103277	up	1321		AT3g20360/MQC12_11 [Source:UniProtKB/TrEMBL;Acc:Q8W0Z1]
AT1G15630	48.9931	78.3772	19.6091	1.99891	1.04505e-07	2.54517e-06	up	1102		Transmembrane protein [Source:UniProtKB/TrEMBL;Acc:Q5BQ07]
AT5G45500	4435.58	5559.6	3311.55	0.747475	2.27098e-06	4.43764e-05	up	2691		RNI-like superfamily protein [Source:UniProtKB/TrEMBL;Acc:Q9FHI6]
AT4G10530	100.917	185.487	16.3476	3.50417	1.28382e-05	0.00021859	up	2244		Subtilase family protein [Source:TAIR;Acc:AT4G10530]
AT4G11480	129.049	176.779	81.3201	1.12026	6.33899e-06	0.000114477	up	2094	CRK32	Putative cysteine-rich receptor-like protein kinase 32 [Source:UniProtKB/Swiss-Prot;Acc:Q9LDS6]
AT3G23123	3.02035	6.0407	0	Inf	0.00581818	0.0464044	up	246		Transmembrane protein [Source:UniProtKB/TrEMBL;Acc:A0A1I9LM80]
AT3G23120	12.1667	23.04	1.29347	4.15482	0.00559589	0.0449469	up	2398	AtRLP38	Receptor-like protein 38 [Source:UniProtKB/Swiss-Prot;Acc:Q9LS79]
AT4G27280	747.454	1257.32	237.587	2.40383	4.51311e-06	8.36782e-05	up	1207	KRP1	Calcium-binding protein KRP1 [Source:UniProtKB/Swiss-Prot;Acc:O81831]
AT2G25510	32.7302	48.3036	17.1567	1.49335	0.000643988	0.00715568	up	633		Expressed protein [Source:UniProtKB/TrEMBL;Acc:Q8S8H2]
AT5G63130	142.836	196.112	89.5593	1.13076	2.31019e-06	4.50539e-05	up	1631		At5g63130 [Source:UniProtKB/TrEMBL;Acc:Q9FML0]
AT1G01060	219.296	280.657	157.934	0.829491	0.000127618	0.00174426	up	2671	LHY	LHY1 [Source:UniProtKB/TrEMBL;Acc:A0A178W761]
AT4G22710	134.918	240.28	29.5563	3.02318	0.000901305	0.00965045	up	1855	CYP706A2	Cytochrome P450 - like protein [Source:UniProtKB/TrEMBL;Acc:O49652]
AT5G61050	5.46919	9.9347	1.00368	3.30718	0.00566686	0.0454148	up	759		Histone deacetylase-related / HD-like protein [Source:UniProtKB/TrEMBL;Acc:Q9FNQ9]
AT5G13750	6360.63	7803.55	4917.71	0.666144	0.000274014	0.00345272	up	1983	ZIFL1	ZIFL1 [Source:UniProtKB/TrEMBL;Acc:A0A178UFA6]
AT3G21340	490.24	649.275	331.205	0.971103	0.000387868	0.00465963	up	2970		Receptor-like protein kinase At3g21340 [Source:UniProtKB/Swiss-Prot;Acc:Q9LIG2]
AT2G29250	43.3188	84.0005	2.63713	4.99336	9.54258e-11	3.46917e-09	up	1872	LECRK32	Putative inactive L-type lectin-domain containing receptor kinase III.2 [Source:UniProtKB/Swiss-Prot;Acc:Q9ZW11]
AT5G11060	211.435	257.101	165.768	0.633168	0.00294824	0.0262279	up	2531	KNAT4	KNAT4 [Source:UniProtKB/TrEMBL;Acc:A0A178UC59]
AT1G14870	11912.3	15903.3	7921.34	1.00551	9.02307e-11	3.29467e-09	up	919	PCR2	PCR2 [Source:UniProtKB/TrEMBL;Acc:A0A178WDU8]
AT1G66160	272.771	370.79	174.753	1.08529	1.31454e-07	3.1554e-06	up	1389	PUB20	U-box domain-containing protein 20 [Source:UniProtKB/Swiss-Prot;Acc:Q9C8D1]
AT1G17750	226.584	275.637	177.53	0.634709	0.00224625	0.0209015	up	3712	PEPR2	Leucine-rich repeat receptor-like protein kinase PEPR2 [Source:UniProtKB/Swiss-Prot;Acc:Q9FZ59]
AT4G37220	79.7382	154.882	4.59402	5.07527	6.86699e-05	0.00101272	up	866		Cold-regulated 413 plasma membrane protein 4 [Source:UniProtKB/Swiss-Prot;Acc:O23164]
AT1G60130	136.189	186.047	86.3314	1.10771	6.31134e-06	0.000114143	up	1847	JAL18	Jacalin-related lectin 18 [Source:UniProtKB/Swiss-Prot;Acc:O80737]
AT1G51920	13.246	25.8451	0.646872	5.32027	9.47367e-08	2.32309e-06	up	315		unknown protein; FUNCTIONS IN: molecular_function unknown; INVOLVED IN: biological_process unknown; LOCATED IN: endomembrane system; EXPRESSED IN: stem, stamen; EXPRESSED DURING: 4 anthesis; Ha. [Source:TAIR;Acc:AT1G51920]
AT4G39700	96.43	132.991	59.8689	1.15145	3.58413e-05	0.000559589	up	836	HIPP23	Heavy metal-associated isoprenylated plant protein 23 [Source:UniProtKB/Swiss-Prot;Acc:O65657]
AT1G05010	1558.24	2027.55	1088.93	0.896825	4.31981e-08	1.11966e-06	up	1529	ACO4	1-aminocyclopropane-1-carboxylate oxidase 4 [Source:UniProtKB/Swiss-Prot;Acc:Q06588]
AT1G55120	360.784	429.648	291.919	0.557587	0.00417003	0.0349299	up	2060	CWINV3	Beta-fructofuranosidase, insoluble isoenzyme CWINV3 [Source:UniProtKB/Swiss-Prot;Acc:Q67XZ3]
AT3G54450	43.0412	71.7863	14.296	2.3281	7.86287e-08	1.95493e-06	up	1830	NPF5.4	Protein NRT1/ PTR FAMILY 5.4 [Source:UniProtKB/Swiss-Prot;Acc:Q9M1I2]
AT1G66200	154725	193532	115918	0.739465	0.00169619	0.0164184	up	1406	ATGSR2	Glutamine synthetase [Source:UniProtKB/TrEMBL;Acc:F4ID91]
AT5G01750	3739.73	4776.98	2702.49	0.821807	1.2409e-07	2.993e-06	up	1493		Protein LURP-one-related 15 [Source:UniProtKB/Swiss-Prot;Acc:Q9LZX1]
AT3G52800	3323.92	3899.85	2748	0.505037	0.00116361	0.0119574	up	1292	SAP6	A20/AN1-like zinc finger family protein [Source:UniProtKB/TrEMBL;Acc:A0A178VIF4]
AT1G68690	1550.03	2014.26	1085.8	0.891501	5.59662e-08	1.42694e-06	up	3243	PERK9	Proline-rich receptor-like protein kinase PERK9 [Source:UniProtKB/Swiss-Prot;Acc:Q9SX31]
AT4G23515	54.3666	73.7636	34.9695	1.07681	0.00189305	0.0180377	up	1254		Toll-Interleukin-Resistance (TIR) domain family protein [Source:TAIR;Acc:AT4G23515]
AT2G19050	111.985	140.785	83.1855	0.759094	0.00402476	0.033929	up	1119		GDSL esterase/lipase At2g19050 [Source:UniProtKB/Swiss-Prot;Acc:O64468]
AT2G35980	597.99	1007.22	188.758	2.41578	2.05601e-25	2.39186e-23	up	1048	NHL10	NDR1/HIN1-like protein 10 [Source:UniProtKB/Swiss-Prot;Acc:Q9SJ52]
AT5G52700	5.24901	10.498	0	Inf	9.20047e-05	0.00131124	up	1113		Copper transport protein family [Source:UniProtKB/TrEMBL;Acc:Q9LTE7]
AT5G11920	1014.95	1723.7	306.201	2.49296	9.94972e-30	1.45534e-27	up	2003	CWINV6	Beta-fructofuranosidase, insoluble isoenzyme CWINV6 [Source:UniProtKB/Swiss-Prot;Acc:Q8W4S6]
AT4G10010	7.85808	14.7125	1.00368	3.87367	0.00253651	0.0231468	up	2522		Protein kinase superfamily protein [Source:UniProtKB/TrEMBL;Acc:Q9T0F9]
AT3G22600	6496.31	7905.6	5087.02	0.636054	0.000252996	0.00322854	up	1414		AT3g22600/F16J14_17 [Source:UniProtKB/TrEMBL;Acc:Q9LJ86]
AT4G01820	53.6895	76.5344	30.8446	1.31109	0.000141795	0.0019233	up	3771	ABCB3	ABC transporter B family member 3 [Source:UniProtKB/Swiss-Prot;Acc:Q9SYI2]
AT4G19680	237.799	315.396	160.201	0.977277	9.50322e-05	0.00134977	up	1350	IRT2	Fe(2+) transport protein 2 [Source:UniProtKB/Swiss-Prot;Acc:O81850]
AT5G64250	5977.58	7288.87	4666.29	0.643418	3.40895e-05	0.000534239	up	1475		2-nitropropane dioxygenase-like protein [Source:UniProtKB/TrEMBL;Acc:Q9FMG0]
AT5G46950	12.1845	22.7352	1.63373	3.79869	3.09929e-06	5.93109e-05	up	650		At5g46950 [Source:UniProtKB/TrEMBL;Acc:Q9FJR6]
AT5G65800	109.848	147.676	72.0195	1.03597	0.00102001	0.0106971	up	1877	ACS5	ETO2 [Source:UniProtKB/TrEMBL;Acc:A0A178UQM2]
AT1G51680	7752.66	9511.55	5993.76	0.666219	2.6033e-05	0.000418738	up	2055	4CL1	4-coumarate--CoA ligase 1 [Source:UniProtKB/Swiss-Prot;Acc:Q42524]
AT3G10660	870.532	1015	726.06	0.483324	0.00519941	0.042073	up	3151	CPK2	Calcium-dependent protein kinase 2 [Source:UniProtKB/Swiss-Prot;Acc:Q38870]
AT3G45660	71.2754	97.2498	45.301	1.10215	0.00354734	0.0306375	up	1902		Major facilitator superfamily protein [Source:UniProtKB/TrEMBL;Acc:A0A1I9LN67]
AT4G22070	2224.87	3163.16	1286.58	1.29783	6.58493e-10	2.20485e-08	up	2009	WRKY31	Probable WRKY transcription factor 31 [Source:UniProtKB/Swiss-Prot;Acc:Q93WT0]
AT1G13210	1966.3	2396.8	1535.8	0.642123	4.78823e-05	0.000728487	up	4194	ALA11	Probable phospholipid-transporting ATPase 11 [Source:UniProtKB/Swiss-Prot;Acc:Q9SAF5]
AT3G56620	295.99	419.442	172.538	1.28156	3.43228e-06	6.51096e-05	up	1472		WAT1-related protein At3g56620 [Source:UniProtKB/Swiss-Prot;Acc:Q9LXX8]
AT4G39830	158.315	244.619	72.0121	1.76422	2.582e-13	1.20487e-11	up	2105		At4g39830 [Source:UniProtKB/TrEMBL;Acc:O65670]
AT4G20000	426.51	719.024	133.996	2.42385	5.43492e-34	9.92249e-32	up	1026		At4g20000 [Source:UniProtKB/TrEMBL;Acc:O49427]
AT3G28910	697.765	973.627	421.903	1.20646	1.1845e-11	4.74027e-10	up	1767	MYB30	Transcription factor MYB30 [Source:UniProtKB/Swiss-Prot;Acc:Q9SCU7]
AT4G11390	108.724	176.607	40.8399	2.11249	8.33839e-10	2.737e-08	up	1725		Cysteine/Histidine-rich C1 domain family protein [Source:TAIR;Acc:AT4G11390]
AT2G44290	106.37	154.199	58.5415	1.39727	2.06504e-07	4.82266e-06	up	1149	YLS3	Protein YLS3 [Source:UniProtKB/Swiss-Prot;Acc:O64864]
AT5G39580	1028.89	1850.44	207.352	3.15771	1.97791e-20	1.62202e-18	up	1267	PER62	Peroxidase 62 [Source:UniProtKB/Swiss-Prot;Acc:Q9FKA4]
AT5G45240	88.3785	171.415	5.34156	5.00409	4.39756e-25	4.977e-23	up	2566		Disease resistance protein (TIR-NBS-LRR class) [Source:UniProtKB/TrEMBL;Acc:F4KD49]
AT4G11290	2192.72	2667.02	1718.43	0.634133	0.000122626	0.00168153	up	1340	PER39	Peroxidase 39 [Source:UniProtKB/Swiss-Prot;Acc:Q9SUT2]
AT1G16670	715.249	906.294	524.204	0.789851	6.55207e-06	0.000117984	up	1929	CRPK1	Cold-responsive protein kinase 1 [Source:UniProtKB/Swiss-Prot;Acc:Q93YN1]
AT5G22555	171	325.373	16.6263	4.29056	6.52149e-17	4.0576e-15	up	595		unknown protein; Ha. [Source:TAIR;Acc:AT5G22555]
AT2G05940	1063.63	1274.39	852.88	0.57939	0.00056816	0.00640415	up	2031	RIPK	Serine/threonine-protein kinase RIPK [Source:UniProtKB/Swiss-Prot;Acc:Q9ZUF4]
AT2G43820	4657.1	5792.32	3521.87	0.717799	5.712e-06	0.000104056	up	1744	UGT74F2	UDP-glycosyltransferase 74F2 [Source:UniProtKB/Swiss-Prot;Acc:O22822]
AT5G39000	179.358	239.437	119.28	1.0053	9.13953e-06	0.000159859	up	2853		Putative receptor-like protein kinase At5g39000 [Source:UniProtKB/Swiss-Prot;Acc:Q9FID8]
AT5G37490	21.8711	37.2469	6.49527	2.51966	2.57648e-06	4.99557e-05	up	1723	PUB21	U-box domain-containing protein 21 [Source:UniProtKB/Swiss-Prot;Acc:Q5PNY6]
AT1G53830	1355.78	1687.81	1023.76	0.721282	4.30028e-05	0.00066068	up	2037	PME2	Pectinesterase 2 [Source:UniProtKB/Swiss-Prot;Acc:Q42534]
AT4G19720	441.951	594.607	289.296	1.03939	2.68197e-08	7.19825e-07	up	1445		Glycosyl hydrolase family protein with chitinase insertion domain [Source:TAIR;Acc:AT4G19720]
AT5G01380	24.988	36.4561	13.5199	1.43107	0.00196841	0.0186492	up	1296	GT-3A	Trihelix transcription factor GT-3a [Source:UniProtKB/Swiss-Prot;Acc:Q9SDW0]
AT5G40450	10021.6	12492.5	7550.71	0.726373	2.68074e-06	5.18566e-05	up	9096		unknown protein; FUNCTIONS IN: molecular_function unknown; INVOLVED IN: biological_process unknown; LOCATED IN: chloroplast, plasma membrane; EXPRESSED IN: 24 plant structures; EXPRESSED DURING: 13 growth stages; Ha. [Source:TAIR;Acc:AT5G40450]
AT3G13433	46.0159	87.2311	4.8008	4.1835	8.46651e-10	2.77179e-08	up	503		Transmembrane protein [Source:UniProtKB/TrEMBL;Acc:F4JDB5]
AT3G13432	137.913	197.087	78.7387	1.32369	1.35755e-07	3.23998e-06	up	621		Transmembrane protein [Source:UniProtKB/TrEMBL;Acc:Q56YQ1]
AT3G13435	436.247	561.515	310.979	0.852507	5.31252e-06	9.7417e-05	up	539		At3g13435 [Source:UniProtKB/TrEMBL;Acc:Q8GZ07]
AT2G34390	21.1594	32.45	9.86884	1.71727	0.00105382	0.0110009	up	1011	NIP2-1	Aquaporin NIP2-1 [Source:UniProtKB/Swiss-Prot;Acc:Q8W037]
AT5G38550	707.148	888.562	525.733	0.757142	0.000558553	0.00632436	up	2195	JAL44	Jacalin-related lectin 44 [Source:UniProtKB/Swiss-Prot;Acc:Q9FFW6]
AT1G78410	44.0056	81.6327	6.37861	3.67783	3.56347e-07	8.08065e-06	up	982	VQ10	VQ motif-containing protein 10 [Source:UniProtKB/Swiss-Prot;Acc:Q8VYI5]
AT1G21440	1988.72	2455.28	1522.15	0.68978	0.00360976	0.0310907	up	1350		At1g21440 [Source:UniProtKB/TrEMBL;Acc:Q501F7]
AT1G40087	6.86044	13.7209	0	Inf	1.28557e-05	0.000218739	up	1320		Plant transposase (Ptta/En/Spm family) [Source:UniProtKB/TrEMBL;Acc:F4I6H5]
AT4G16820	9.54184	18.4536	0.630049	4.8723	0.000280224	0.00352033	up	1914	PLA-I{beta]2	Phospholipase A1-Ibeta2, chloroplastic [Source:UniProtKB/Swiss-Prot;Acc:O23522]
AT4G23880	224.886	269.948	179.824	0.586092	0.00423666	0.0354051	up	1107		At4g23880 [Source:UniProtKB/TrEMBL;Acc:Q9T0A3]
AT4G28850	190.326	338.347	42.3052	2.9996	0.00273592	0.0247043	up	1181	XTH26	Probable xyloglucan endotransglucosylase/hydrolase protein 26 [Source:UniProtKB/Swiss-Prot;Acc:Q9SVV2]
AT3G26960	20.6327	36.1411	5.12424	2.81823	1.25067e-06	2.55779e-05	up	1320		Pollen Ole e 1 allergen and extensin family protein [Source:UniProtKB/TrEMBL;Acc:F4JEV5]
AT1G30370	443.104	686.594	199.614	1.78225	1.88211e-13	8.95541e-12	up	1779		DLAH [Source:UniProtKB/TrEMBL;Acc:A0A178W2K8]
AT2G36020	8.63428	16.962	0.306613	5.78974	2.31106e-06	4.50539e-05	up	1351	HVA22J	HVA22-like protein [Source:UniProtKB/TrEMBL;Acc:Q1PEW5]
AT1G26410	470.728	869.52	71.9361	3.59543	5.19877e-30	7.73997e-28	up	1836	FOX4	Berberine bridge enzyme-like 6 [Source:UniProtKB/Swiss-Prot;Acc:Q9FZC7]
AT1G64160	69.357	132.654	6.06007	4.45219	1.36496e-06	2.76888e-05	up	897	DIR5	Dirigent protein 5 [Source:UniProtKB/Swiss-Prot;Acc:Q9SH66]
AT3G52748	252.295	364.335	140.255	1.37722	1.27281e-09	4.10781e-08	up	436		other RNA [Source:TAIR;Acc:AT3G52748]
AT4G18390	425.673	548.282	303.063	0.855299	0.000162095	0.00216692	up	1733	TCP2	Transcription factor TCP2 [Source:UniProtKB/Swiss-Prot;Acc:Q93V43]
AT1G24100	2018.4	2397.54	1639.25	0.548525	0.00438282	0.0364197	up	1673	UGT74B1	Glycosyltransferase [Source:UniProtKB/TrEMBL;Acc:A0A178WKT6]
AT1G61480	390.421	532.349	248.493	1.09917	4.46259e-05	0.000683098	up	2816		G-type lectin S-receptor-like serine/threonine-protein kinase At1g61480 [Source:UniProtKB/Swiss-Prot;Acc:O64771]
AT3G04181	70.2421	93.0486	47.4357	0.972012	0.0018093	0.0173521	up	482		unknown protein; FUNCTIONS IN: molecular_function unknown; INVOLVED IN: biological_process unknown; LOCATED IN: cellular_component unknown; Ha. [Source:TAIR;Acc:AT3G04181]
AT2G25410	63.8426	92.047	35.6381	1.36895	0.00400296	0.0337908	up	1288	ATL22	RING-H2 finger protein ATL22 [Source:UniProtKB/Swiss-Prot;Acc:Q9SKK8]
AT3G15340	307.185	396.819	217.552	0.867124	1.02819e-05	0.00017822	up	2347	PPI2	PPI2 [Source:UniProtKB/TrEMBL;Acc:A0A178VC28]
AT1G67880	519.975	615.997	423.953	0.539019	0.00244213	0.0224238	up	1801		Beta-1,4-N-acetylglucosaminyltransferase family protein [Source:UniProtKB/TrEMBL;Acc:Q9C9V4]
AT4G26470	1163.72	1527.85	799.587	0.934173	3.22752e-08	8.55155e-07	up	1096		Calcium-binding EF-hand family protein [Source:TAIR;Acc:AT4G26470]
AT5G06900	469.071	843.796	94.3448	3.16088	0.00169703	0.0164201	up	1698	CYP93D1	Cytochrome P450, family 93, subfamily D, polypeptide 1 [Source:UniProtKB/TrEMBL;Acc:Q9FL56]
AT4G20450	65.6658	100.739	30.5928	1.71935	7.37301e-05	0.00107844	up	2866		Probable LRR receptor-like serine/threonine-protein kinase At4g20450 [Source:UniProtKB/Swiss-Prot;Acc:C0LGQ7]
AT4G10860	67.5612	127.584	7.53805	4.08112	0.0016796	0.016283	up	843		F8M12.2 protein [Source:UniProtKB/TrEMBL;Acc:O81627]
AT4G09300	136.893	197.173	76.6135	1.36379	2.8199e-07	6.48265e-06	up	1111		LisH and RanBPM domains containing protein [Source:TAIR;Acc:AT4G09300]
AT1G02450	22.7627	36.5375	8.98782	2.02334	0.000947019	0.0100538	up	623	NIMIN-1	NIMIN1 [Source:UniProtKB/TrEMBL;Acc:A0A178WC43]
AT4G32450	380.771	459.329	302.213	0.603963	0.00156306	0.0153134	up	1953	PCMP-H63	Pentatricopeptide repeat-containing protein At4g32450, mitochondrial [Source:UniProtKB/Swiss-Prot;Acc:Q9SUU7]
AT1G09560	17378.5	22142.1	12615	0.811654	1.85495e-05	0.000306851	up	1227	GLP4	Germin-like protein subfamily 2 member 1 [Source:UniProtKB/Swiss-Prot;Acc:P94014]
AT4G08850	3151.55	3656.63	2646.46	0.466451	0.0031527	0.0277562	up	3575	MIK2	MDIS1-interacting receptor like kinase 2 [Source:UniProtKB/Swiss-Prot;Acc:Q8VZG8]
AT4G30140	2319.91	3731.21	908.607	2.03791	5.41777e-31	8.41673e-29	up	1518	CDEF1	CDEF1 [Source:UniProtKB/TrEMBL;Acc:A0A178V2L8]
AT4G11230	471.419	705.76	237.079	1.57381	1.57809e-11	6.21593e-10	up	3184	RBOHI	Probable respiratory burst oxidase homolog protein I [Source:UniProtKB/Swiss-Prot;Acc:Q9SUT8]
AT1G12420	602.944	731.191	474.697	0.62324	0.000405899	0.00484599	up	1916	ACR8	ACT domain-containing protein ACR8 [Source:UniProtKB/Swiss-Prot;Acc:Q9LNA5]
AT5G38900	933.207	1662.35	204.06	3.02616	1.6502e-32	2.73343e-30	up	971		Thioredoxin superfamily protein [Source:TAIR;Acc:AT5G38900]
AT4G13890	401.94	642.626	161.255	1.99463	0.000205938	0.00266887	up	1637	SHM5	Serine hydroxymethyltransferase 5 [Source:UniProtKB/Swiss-Prot;Acc:Q9SVM4]
AT1G01340	2145.8	2697.53	1594.07	0.758922	3.03172e-06	5.81513e-05	up	2480	CNGC10	Probable cyclic nucleotide-gated ion channel 10 [Source:UniProtKB/Swiss-Prot;Acc:Q9LNJ0]
AT3G63380	3411.57	5102.74	1720.4	1.56853	2.04845e-12	8.91058e-11	up	3877	ACA12	Calcium-transporting ATPase [Source:UniProtKB/TrEMBL;Acc:A0A178VEV7]
AT2G23290	320.782	389.611	251.953	0.628883	0.00111624	0.0115414	up	1527	AtMYB70	At2g23280 [Source:UniProtKB/TrEMBL;Acc:O22179]
AT5G01490	740.366	1061.33	419.401	1.33947	2.7552e-14	1.38938e-12	up	1677	CAX4	cation exchanger 4 [Source:TAIR;Acc:AT5G01490]
AT1G55850	4374.22	5128.4	3620.03	0.502507	0.000937419	0.00997308	up	2570	CSLE1	Cellulose synthase-like protein E1 [Source:UniProtKB/Swiss-Prot;Acc:Q8VZK9]
AT5G64750	94.2471	137.144	51.3502	1.41725	3.50231e-07	7.95639e-06	up	1638	ABR1	Ethylene-responsive transcription factor ABR1 [Source:UniProtKB/Swiss-Prot;Acc:Q9FGF8]
AT1G78000	26575.8	35360.6	17791	0.990996	0.00178624	0.0171705	up	2746	SULTR1;2	Sulfate transporter 1.2 [Source:UniProtKB/Swiss-Prot;Acc:Q9MAX3]
AT1G73780	106.192	139.032	73.3523	0.922505	0.000608487	0.00680353	up	769		Bifunctional inhibitor/lipid-transfer protein/seed storage 2S albumin superfamily protein [Source:UniProtKB/TrEMBL;Acc:Q9C9T4]
AT1G70780	6339.71	7723.02	4956.41	0.63987	0.00108911	0.0113173	up	1136		At1g70780/F5A18_4 [Source:UniProtKB/TrEMBL;Acc:Q9S812]
AT1G72125	476.104	562.455	389.752	0.52918	0.00550021	0.0442921	up	1892	NPF5.13	Protein NRT1/ PTR FAMILY 5.13 [Source:UniProtKB/Swiss-Prot;Acc:Q0WSZ6]
AT2G03600	55.8474	74.4289	37.2659	0.998009	0.00293915	0.0261709	up	1260	ATUPS3	Ureide permease 3 [Source:UniProtKB/TrEMBL;Acc:F4IT87]
AT2G46160	88.3898	115.177	61.6027	0.902783	0.00130605	0.0131193	up	1272	ATL67	RING-H2 finger protein ATL67 [Source:UniProtKB/Swiss-Prot;Acc:O82353]
AT3G54500	236.412	358.323	114.501	1.64591	4.06157e-12	1.69879e-10	up	2297		BEST Arabidopsis thaliana protein match is: dentin sialophosphoprotein-related (TAIR:AT5G64170.1); Ha. [Source:TAIR;Acc:AT3G54500]
AT5G57480	1329.76	1637.78	1021.73	0.680731	5.15491e-05	0.000779532	up	2133		AAA-ATPase At5g57480 [Source:UniProtKB/Swiss-Prot;Acc:Q9FKM3]
AT4G15300	164.19	207.984	120.397	0.78867	0.000677946	0.00748644	up	1582	CYP702A2	Cytochrome P450 like protein [Source:UniProtKB/TrEMBL;Acc:O23384]
AT5G53460	116438	147494	85382.4	0.788647	0.00018634	0.00244658	up	7192	GLT1	Glutamate synthase 1 [NADH], chloroplastic [Source:UniProtKB/Swiss-Prot;Acc:Q9LV03]
AT3G21230	1050.43	1358.65	742.221	0.872249	2.75613e-07	6.34189e-06	up	2095	4CL4	4-coumarate--CoA ligase 4 [Source:UniProtKB/Swiss-Prot;Acc:Q9LU36]
AT3G16030	567.814	712.724	422.905	0.75301	3.23128e-05	0.000508627	up	2881	CES101	Lectin protein kinase family protein [Source:UniProtKB/TrEMBL;Acc:A0A1I9LPL5]
AT4G01700	425.448	552.195	298.701	0.886476	1.71037e-06	3.40024e-05	up	966		At4g01700 [Source:UniProtKB/TrEMBL;Acc:Q9ZSI6]
AT3G26180	21.6551	33.8144	9.49576	1.83228	0.000375807	0.00453608	up	1697	CYP71B20	Cytochrome P450 71B20 [Source:UniProtKB/Swiss-Prot;Acc:Q9LTM3]
AT1G18970	3927.26	6334.21	1520.3	2.05881	5.64672e-25	6.30517e-23	up	1115	GLP1	Germin-like protein subfamily T member 1 [Source:UniProtKB/Swiss-Prot;Acc:P92995]
AT4G21390	583.719	707.459	459.98	0.621076	0.000417437	0.0049695	up	3024	B120	B120 [Source:UniProtKB/TrEMBL;Acc:A0A178USE7]
AT1G79250	56.2733	79.3714	33.1752	1.25851	0.000384249	0.00462282	up	2087	AGC1-7	Serine/threonine-protein kinase AGC1-7 [Source:UniProtKB/Swiss-Prot;Acc:Q1PFB9]
AT4G13440	218.033	263.106	172.96	0.605203	0.00578089	0.0461511	up	754		Calcium-binding EF-hand family protein [Source:TAIR;Acc:AT4G13440]
AT1G64065	112.081	154.398	69.7641	1.14609	0.00108159	0.0112579	up	1275		Late embryogenesis abundant protein At1g64065 [Source:UniProtKB/Swiss-Prot;Acc:Q6DST1]
AT1G01680	163.712	304.28	23.1449	3.71663	1.17201e-29	1.70431e-27	up	1187	PUB54	U-box domain-containing protein 54 [Source:UniProtKB/Swiss-Prot;Acc:Q9LQ92]
AT1G01660	187.141	242.696	131.587	0.88314	0.000494474	0.0057126	up	1864		RING/U-box superfamily protein [Source:TAIR;Acc:AT1G01660]
AT1G13550	163.992	237.348	90.6357	1.38886	3.43654e-09	1.04393e-07	up	1270		Putative uncharacterized protein [Source:UniProtKB/TrEMBL;Acc:Q3EDD3]
AT5G24210	54.5575	74.3839	34.731	1.09876	0.00116036	0.0119338	up	1675		Alpha/beta-Hydrolases superfamily protein [Source:UniProtKB/TrEMBL;Acc:Q9FNG1]
AT1G55230	46.3672	85.1914	7.54295	3.49751	4.8505e-07	1.07269e-05	up	1215		Proteinase inhibitor I4, serpin (DUF716) [Source:UniProtKB/TrEMBL;Acc:Q9C893]
AT2G26560	2226.79	4045.16	408.421	3.30807	5.15063e-32	8.31145e-30	up	1644	PLP2	Patatin-like protein 2 [Source:UniProtKB/Swiss-Prot;Acc:O48723]
AT3G05155	211.246	270.936	151.556	0.838099	6.45859e-05	0.000959846	up	1655		Major facilitator superfamily protein [Source:TAIR;Acc:AT3G05155]
AT5G65300	175.757	229.747	121.768	0.915913	0.00153189	0.0150523	up	972		Uncharacterized protein At5g65300 [Source:UniProtKB/TrEMBL;Acc:Q9FKQ7]
AT4G25070	1624.98	1931.55	1318.42	0.550955	0.000973582	0.0102922	up	2636		Caldesmon-like protein [Source:UniProtKB/TrEMBL;Acc:A0MFT2]
AT1G70420	876.624	1045.49	707.755	0.562861	0.000808885	0.00876595	up	1277		At1g70420/F17O7_4 [Source:UniProtKB/TrEMBL;Acc:O64594]
AT2G26820	1631.81	2098.93	1164.68	0.849716	1.08291e-06	2.24035e-05	up	1697	ATPP2-A3	phloem protein 2-A3 [Source:TAIR;Acc:AT2G26820]
AT2G44390	49.3795	69.5272	29.2318	1.25004	0.00048514	0.00562295	up	630		Cysteine/Histidine-rich C1 domain family protein [Source:UniProtKB/TrEMBL;Acc:O64873]
AT2G37370	63.3943	89.8282	36.9603	1.28119	0.00191472	0.0182233	up	2367		unknown protein; BEST Arabidopsis thaliana protein match is: unknown protein (TAIR:AT5G13560.1); Ha. [Source:TAIR;Acc:AT2G37370]
AT4G33730	170.01	257.59	82.4301	1.64383	0.00110444	0.0114487	up	611		CAP (Cysteine-rich secretory proteins, Antigen 5, and Pathogenesis-related 1 protein) superfamily protein [Source:UniProtKB/TrEMBL;Acc:O81889]
AT4G19970	164.289	295.821	32.7568	3.17486	3.24868e-34	5.97471e-32	up	1349		CONTAINS InterPro DOMAIN/s: Nucleotide-diphospho-sugar transferase, predicted (InterPro:IPR005069); BEST Arabidopsis thaliana protein match is: Nucleotide-diphospho-sugar transferase family protein (TAIR:AT5G44820.1); Ha. [Source:TAIR;Acc:AT4G19970]
AT2G43700	136.827	184.691	88.9631	1.05383	0.000851441	0.00916756	up	2715	LECRK54	L-type lectin-domain containing receptor kinase V.4 [Source:UniProtKB/Swiss-Prot;Acc:O22833]
AT1G60750	2611.86	3302.4	1921.31	0.781425	1.54569e-06	3.1003e-05	up	993		Probable aldo-keto reductase 6 [Source:UniProtKB/Swiss-Prot;Acc:F4HPY8]
AT5G47220	92.8487	143.312	42.3857	1.7575	4.14366e-06	7.72865e-05	up	1314	ERF2	ERF2 [Source:UniProtKB/TrEMBL;Acc:A0A178UCP3]
AT1G67800	2398.97	3221.05	1576.88	1.03045	2.36597e-10	8.32316e-09	up	1928		Copine (Calcium-dependent phospholipid-binding protein) family [Source:UniProtKB/TrEMBL;Acc:F4HTR6]
AT3G23240	31.139	45.0443	17.2338	1.38611	0.00142179	0.0140727	up	988	ERF1B	Ethylene-responsive transcription factor 1B [Source:UniProtKB/Swiss-Prot;Acc:Q8LDC8]
AT2G24720	1020.56	1586.47	454.652	1.80299	6.28021e-25	6.98136e-23	up	3217	GLR2.2	Glutamate receptor 2.2 [Source:UniProtKB/Swiss-Prot;Acc:Q9SHV1]
AT1G42470	1630.99	1933.8	1328.18	0.541987	0.00069854	0.00769686	up	4533		Patched family protein [Source:TAIR;Acc:AT1G42470]
AT5G22520	13.0378	24.7151	1.36049	4.1832	2.70535e-07	6.23652e-06	up	684		At5g22520 [Source:UniProtKB/TrEMBL;Acc:Q9FK87]
AT4G23100	8001.2	9572.9	6429.5	0.574248	0.000254343	0.00324242	up	2320	GSH1	Glutamate--cysteine ligase, chloroplastic [Source:UniProtKB/Swiss-Prot;Acc:P46309]
AT1G08670	232.666	306.808	158.524	0.95264	8.38206e-06	0.000147642	up	1071		ENTH/VHS family protein [Source:UniProtKB/TrEMBL;Acc:Q9FRR8]
AT1G09070	3332.06	4165.75	2498.37	0.737591	0.00310177	0.0273753	up	1606	SRC2	Protein SRC2 homolog [Source:UniProtKB/Swiss-Prot;Acc:O04023]
AT1G58300	3.51765	7.03531	0	Inf	0.00360082	0.0310351	up	1231	HO4	Heme oxygenase 4, chloroplastic [Source:UniProtKB/Swiss-Prot;Acc:Q9LQC0]
AT5G44020	10420.4	13526.7	7314.22	0.887029	1.56455e-08	4.34323e-07	up	1409		HAD superfamily, subfamily IIIB acid phosphatase [Source:UniProtKB/TrEMBL;Acc:Q9FNC4]
AT1G50090	34.8667	65.156	4.57748	3.83127	1.12111e-14	5.90342e-13	up	1213	BCAT7	Putative branched-chain-amino-acid aminotransferase 7 [Source:UniProtKB/Swiss-Prot;Acc:Q9LPM8]
AT2G29110	75.5187	141.152	9.88566	3.83576	1.88839e-21	1.64573e-19	up	2922	ATGLR2.8	Glutamate receptor [Source:UniProtKB/TrEMBL;Acc:A0A178VW76]
AT5G44480	3128.56	3785.53	2471.59	0.615055	0.000166297	0.00221718	up	1544	DUR	Putative UDP-arabinose 4-epimerase 4 [Source:UniProtKB/Swiss-Prot;Acc:Q9FI17]
AT2G18660	29.7707	58.588	0.953486	5.94125	0.00113698	0.0117319	up	2106	EGC2	EG45-like domain containing protein 2 [Source:UniProtKB/Swiss-Prot;Acc:Q9ZV52]
AT5G39120	527.16	863.793	190.527	2.18069	5.57877e-05	0.000838558	up	830		Germin-like protein subfamily 1 member 15 [Source:UniProtKB/Swiss-Prot;Acc:Q9FIC9]
AT2G43000	373.929	718.396	29.4617	4.60787	3.31143e-58	1.72553e-55	up	1207	JUB1	Transcription factor JUNGBRUNNEN 1 [Source:UniProtKB/Swiss-Prot;Acc:Q9SK55]
AT4G07820	2184.19	3177.39	1190.99	1.41568	5.59218e-07	1.22052e-05	up	827		At4g07820 [Source:UniProtKB/TrEMBL;Acc:Q9ZPG2]
AT5G47850	30.022	58.1203	1.92379	4.91701	1.70681e-16	1.0387e-14	up	2522	CCR4	Serine/threonine-protein kinase-like protein CCR4 [Source:UniProtKB/Swiss-Prot;Acc:Q9FIJ6]
AT3G14940	37720.5	46541.3	28899.7	0.687455	0.00125542	0.0126974	up	3491	PPC3	Phosphoenolpyruvate carboxylase 3 [Source:UniProtKB/Swiss-Prot;Acc:Q84VW9]
AT1G07000	1277.23	1703.74	850.723	1.00194	1.26264e-09	4.08027e-08	up	2276	ATEXO70B2	Exocyst subunit Exo70 family protein [Source:UniProtKB/TrEMBL;Acc:A0A178WCB5]
AT5G04930	3919.39	4525.69	3313.1	0.449958	0.00516289	0.0418723	up	4659	ALA1	Phospholipid-transporting ATPase [Source:UniProtKB/TrEMBL;Acc:A0A178UBN1]
AT5G42510	392.415	586.118	198.711	1.56052	0.00508507	0.0413753	up	947	DIR1	Dirigent protein 1 [Source:UniProtKB/Swiss-Prot;Acc:Q9FIG6]
AT1G53940	632.969	774.655	491.283	0.656999	0.000878012	0.00941977	up	1505	GLIP2	GDSL esterase/lipase 2 [Source:UniProtKB/Swiss-Prot;Acc:Q9SYF0]
AT3G49830	49.8488	66.0224	33.6752	0.971268	0.00565818	0.0453597	up	1596		RuvB-like helicase [Source:UniProtKB/TrEMBL;Acc:Q9M2X5]
AT2G33020	61.1204	82.0535	40.1873	1.02982	0.00130039	0.0130781	up	2672	AtRLP24	Receptor like protein 24 [Source:UniProtKB/Swiss-Prot;Acc:O49329]
AT2G26390	71.7057	111.18	32.2317	1.78634	1.26984e-08	3.55669e-07	up	1539		Serpin-Z3 [Source:UniProtKB/Swiss-Prot;Acc:O48706]
AT3G16860	257.524	392.35	122.699	1.67701	4.15692e-15	2.26028e-13	up	2390	COBL8	COBRA-like protein 8 [Source:UniProtKB/Swiss-Prot;Acc:Q9LIB6]
AT5G57620	557.13	655.141	459.118	0.51294	0.0034572	0.0300039	up	1383	MYB36	Transcription factor MYB36 [Source:UniProtKB/Swiss-Prot;Acc:Q9FKL2]
AT1G32940	1047.82	1350.19	745.438	0.857007	5.08626e-07	1.11889e-05	up	2708	SBT3.5	Subtilisin-like protease SBT3.5 [Source:UniProtKB/Swiss-Prot;Acc:Q9MAP7]
AT5G57625	1563.43	2022.04	1104.81	0.872009	0.00346541	0.0300335	up	935		At5g57625 [Source:UniProtKB/TrEMBL;Acc:Q9FKL1]
AT5G57510	89.1329	167.577	10.6886	3.97069	3.54468e-31	5.54122e-29	up	751		Cotton fiber protein [Source:UniProtKB/TrEMBL;Acc:Q9FKM0]
AT1G76620	28.8006	42.1457	15.4554	1.44727	0.0015401	0.0151181	up	2092		At1g76620/F14G6_22 [Source:UniProtKB/TrEMBL;Acc:Q8W4R7]
AT1G49030	246.527	325.966	167.089	0.964104	3.20282e-06	6.10121e-05	up	1037	PCR6	Protein PLANT CADMIUM RESISTANCE 6 [Source:UniProtKB/Swiss-Prot;Acc:Q9M9A5]
AT5G44610	3918.15	5250.6	2585.7	1.02193	9.2895e-11	3.38701e-09	up	856	PCAP2	Plasma membrane-associated cation-binding protein 2 [Source:UniProtKB/Swiss-Prot;Acc:Q9LU05]
AT5G42610	40.9274	77.617	4.23777	4.195	1.25825e-18	9.04348e-17	up	1047		Calcium uniporter protein 4, mitochondrial [Source:UniProtKB/Swiss-Prot;Acc:Q9FJV7]
AT3G26470	2256.41	2921.12	1591.69	0.875962	6.80507e-08	1.71064e-06	up	1620		Powdery mildew resistance protein, RPW8 domain-containing protein [Source:UniProtKB/TrEMBL;Acc:Q9LIM8]
AT3G17600	40.9692	56.1404	25.798	1.12178	0.0038205	0.0325582	up	892	IAA31	IAA31 [Source:UniProtKB/TrEMBL;Acc:A0A384LMF0]
AT4G10500	523.408	938.995	107.82	3.12249	9.61349e-24	9.73493e-22	up	1358	DLO1	Protein DMR6-LIKE OXYGENASE 1 [Source:UniProtKB/Swiss-Prot;Acc:Q9ZSA8]
AT5G46260	217.92	267.3	168.539	0.665375	0.00247501	0.0226767	up	4166		Disease resistance protein (TIR-NBS-LRR class) family [Source:UniProtKB/TrEMBL;Acc:Q9FL35]
AT5G60800	235.119	290.55	179.687	0.693301	0.00100117	0.0105304	up	1202		Heavy metal transport/detoxification superfamily protein [Source:UniProtKB/TrEMBL;Acc:F4K0H3]
AT4G21903	364.769	516.094	213.443	1.27378	0.000316053	0.00390376	up	1827		Protein DETOXIFICATION [Source:UniProtKB/TrEMBL;Acc:F4JKB8]
AT4G28410	920.331	1141.2	699.46	0.706239	0.000626228	0.00698004	up	1750		Tyrosine transaminase family protein [Source:UniProtKB/TrEMBL;Acc:F4JL94]
AT1G75450	242.604	325.87	159.338	1.03221	0.000487723	0.00564504	up	2367	CKX5	Cytokinin dehydrogenase 5 [Source:UniProtKB/Swiss-Prot;Acc:Q67YU0]
AT1G68450	398.893	611.488	186.298	1.71471	2.74539e-12	1.1718e-10	up	790	VQ8	VQ motif-containing protein 8, chloroplastic [Source:UniProtKB/Swiss-Prot;Acc:Q9CA36]
AT5G23980	3141.72	4469.32	1814.13	1.30078	8.02348e-05	0.00116136	up	2337	FRO4	Ferric reduction oxidase 4 [Source:UniProtKB/Swiss-Prot;Acc:Q8W110]
AT1G01030	44.5988	61.3257	27.8719	1.13768	0.00213254	0.0199847	up	1870	NGA3	B3 domain-containing transcription factor NGA3 [Source:UniProtKB/Swiss-Prot;Acc:Q9MAN1]
AT5G60350	27.9948	53.1853	2.80426	4.24533	1.02019e-08	2.89965e-07	up	1305		unknown protein; Ha. [Source:TAIR;Acc:AT5G60350]
AT4G08450	238.164	325.669	150.659	1.11212	1.52654e-06	3.06928e-05	up	3817		Disease resistance protein (TIR-NBS-LRR class) family [Source:UniProtKB/TrEMBL;Acc:Q9SW60]
AT1G55775	154.223	281.706	26.7398	3.39713	4.6549e-37	9.86681e-35	up	711
AT4G03480	88.0024	134.317	41.6876	1.68796	5.49695e-09	1.61753e-07	up	2252		Ankyrin repeat family protein [Source:UniProtKB/TrEMBL;Acc:F4JG86]
AT1G06350	30.3536	46.2159	14.4913	1.6732	0.000120677	0.00165753	up	1238		Delta-9 desaturase-like 4 protein [Source:UniProtKB/Swiss-Prot;Acc:Q9LMI4]
AT5G52670	56.6615	112.386	0.936663	6.90672	2.98218e-13	1.38902e-11	up	721		Copper transport protein family [Source:UniProtKB/TrEMBL;Acc:Q9LTF0]
AT4G04900	48.5709	75.1522	21.9895	1.773	7.30294e-06	0.000130472	up	839	RIC10	CRIB domain-containing protein RIC10 [Source:UniProtKB/Swiss-Prot;Acc:Q9M0Y9]
AT2G42430	206.548	262.519	150.576	0.801929	0.000251864	0.00321573	up	1237	LBD16	LOB domain-containing protein 16 [Source:UniProtKB/Swiss-Prot;Acc:Q9SLB7]
AT5G41570	261.999	331.197	192.8	0.780581	0.00216962	0.0202842	up	891	WRKY24	Probable WRKY transcription factor 24 [Source:UniProtKB/Swiss-Prot;Acc:Q9FFS3]
AT5G53250	1858.77	2406.39	1311.15	0.876042	1.25483e-07	3.02076e-06	up	745	AGP22	ATAGP22 [Source:UniProtKB/TrEMBL;Acc:A0A178UC75]
AT3G28510	2278.98	4345.27	212.68	4.35269	9.04874e-10	2.95081e-08	up	1960		AAA-ATPase At3g28510 [Source:UniProtKB/Swiss-Prot;Acc:Q9LH84]
AT1G36622	139.423	239.857	38.9898	2.62101	8.39064e-09	2.40673e-07	up	1051		Transmembrane protein [Source:UniProtKB/TrEMBL;Acc:Q1G3E7]
AT1G60730	5826.83	7151.98	4501.67	0.667884	2.98601e-05	0.000474197	up	1548		NAD(P)-linked oxidoreductase superfamily protein [Source:TAIR;Acc:AT1G60730]
AT1G13310	69.4117	123.898	14.9255	3.0533	9.00411e-19	6.54683e-17	up	1545		Endosomal targeting BRO1-like domain-containing protein [Source:UniProtKB/TrEMBL;Acc:Q9FX66]
AT3G54000	407.414	497.221	317.608	0.646642	0.000467603	0.00545	up	2111		TIP41-like protein [Source:UniProtKB/TrEMBL;Acc:Q84JE0]
AT3G50950	1292.39	1620.51	964.262	0.748948	4.40762e-06	8.1783e-05	up	2824	RPP13L4	Disease resistance RPP13-like protein 4 [Source:UniProtKB/Swiss-Prot;Acc:Q38834]
AT3G60700	105.546	139.767	71.3253	0.97054	0.000500925	0.00577238	up	986		Uncharacterized protein T4C21_110 [Source:UniProtKB/TrEMBL;Acc:Q9LZZ3]
AT3G58810	1642.26	2270.81	1013.7	1.16357	1.24621e-12	5.54628e-11	up	2050	MTPA2	Metal tolerance protein A2 [Source:UniProtKB/TrEMBL;Acc:Q3EAH9]
AT3G55790	184.22	344.978	23.461	3.87817	1.15221e-48	3.94781e-46	up	463		Transmembrane protein [Source:UniProtKB/TrEMBL;Acc:Q9M045]
AT2G36470	264.44	319.213	209.668	0.606415	0.00242063	0.0222673	up	1960		DUF868 family protein, putative (DUF868) [Source:UniProtKB/TrEMBL;Acc:Q9SJQ8]
AT4G28620	5.14729	9.63115	0.66342	3.85971	0.00329907	0.028872	up	2043	ABCB24	ABC transporter B family member 24, mitochondrial [Source:UniProtKB/Swiss-Prot;Acc:Q9M0G9]
AT2G38490	61.9929	92.0764	31.9094	1.52885	2.62978e-05	0.000421913	up	1296	CIPK22	CBL-interacting serine/threonine-protein kinase 22 [Source:UniProtKB/Swiss-Prot;Acc:O80902]
AT5G52050	79.608	116.229	42.9867	1.43501	3.61706e-05	0.000563676	up	2174	DTX50	Protein DETOXIFICATION 50 [Source:UniProtKB/Swiss-Prot;Acc:Q9FJ87]
AT2G37430	224.576	290.768	158.383	0.876452	0.00378515	0.0322899	up	940	ZAT11	ZAT11 [Source:UniProtKB/TrEMBL;Acc:A0A178VNJ8]
AT5G60660	2642.38	3334.73	1950.02	0.774083	6.72617e-07	1.4503e-05	up	1448	PIP2-4	PIP2F [Source:UniProtKB/TrEMBL;Acc:A0A178UG45]
AT3G60540	75.7712	114.95	36.5919	1.65142	9.60306e-08	2.35021e-06	up	716		Protein transport protein Sec61 subunit beta [Source:UniProtKB/TrEMBL;Acc:Q9M206]
AT4G22530	1600.43	2167.63	1033.23	1.06896	1.43328e-06	2.89807e-05	up	1703		S-adenosyl-L-methionine-dependent methyltransferases superfamily protein [Source:UniProtKB/TrEMBL;Acc:Q9SUW6]
AT3G60090	18.0231	33.119	2.9272	3.50007	2.78196e-05	0.000443482	up	967		VQ motif-containing protein [Source:UniProtKB/TrEMBL;Acc:Q9M1D4]
AT1G16160	65.2148	94.4236	36.006	1.39091	9.96987e-06	0.000173412	up	2575	WAKL5	WAKL5 [Source:UniProtKB/TrEMBL;Acc:A0A178W9G0]
AT4G11880	2113.51	2821.97	1405.04	1.00609	5.11102e-10	1.74078e-08	up	1287	AGL14	Agamous-like MADS-box protein AGL14 [Source:UniProtKB/Swiss-Prot;Acc:Q38838]
AT5G46960	57.2075	99.8618	14.5533	2.77859	3.64764e-14	1.83202e-12	up	669	PMEI12	Pectinesterase inhibitor 12 [Source:UniProtKB/Swiss-Prot;Acc:Q9FJR5]
AT3G47210	941.526	1135.43	747.626	0.602844	0.000284258	0.00356205	up	2004		AT3g47210/F13I12_260 [Source:UniProtKB/TrEMBL;Acc:Q9SD52]
AT3G25882	231.352	310.137	152.567	1.02346	0.00284225	0.0255004	up	683	NIMIN-2	NIMIN-2 [Source:UniProtKB/TrEMBL;Acc:A0A178VAB1]
AT1G72430	589.416	708.791	470.042	0.59257	0.00120611	0.0123115	up	1205	SAUR78	Auxin-responsive protein SAUR78 [Source:UniProtKB/Swiss-Prot;Acc:Q9C9E1]
AT5G65230	184.367	238.562	130.172	0.873947	0.000276183	0.00347829	up	1355	AtMYB53	Transcription factor MYB53 [Source:UniProtKB/Swiss-Prot;Acc:Q9FJP2]
AT2G32610	319.5	381.735	257.265	0.569318	0.00547589	0.0441105	up	2518	CSLB1	Cellulose synthase-like protein B1 [Source:UniProtKB/Swiss-Prot;Acc:O80898]
AT2G38750	882.427	1125.11	639.749	0.814481	0.00437973	0.036406	up	1604	ANN4	Annexin D4 [Source:UniProtKB/Swiss-Prot;Acc:Q9ZVJ6]
AT2G04450	66.0741	100.071	32.0771	1.64141	3.79533e-07	8.55986e-06	up	1384	NUDT6	Nudix hydrolase 6 [Source:UniProtKB/Swiss-Prot;Acc:Q9SJC4]
AT1G28190	194.09	281.825	106.355	1.40591	2.53501e-10	8.85553e-09	up	1269		F3H9.15 protein [Source:UniProtKB/TrEMBL;Acc:Q9FZ93]
AT1G26560	97.2421	124.284	70.2	0.824099	0.00181108	0.0173604	up	2075	BGLU40	Beta-glucosidase 40 [Source:UniProtKB/Swiss-Prot;Acc:Q9FZE0]
AT5G13250	89.1134	113.379	64.8482	0.806009	0.00416833	0.0349274	up	1532		RING finger protein [Source:UniProtKB/TrEMBL;Acc:F4K2H9]
AT5G39040	1912.54	2381.38	1443.69	0.722036	1.33489e-05	0.000226386	up	2387	ABCB27	ABC transporter B family member 27 [Source:UniProtKB/Swiss-Prot;Acc:Q0WML0]
AT5G14310	806.441	961.857	651.025	0.56311	0.00120812	0.0123236	up	1981	CXE16	CXE16 [Source:UniProtKB/TrEMBL;Acc:A0A178UL11]
AT4G15400	744.312	895.519	593.106	0.594435	0.000568915	0.00640689	up	1677	BIA1	BAHD acyltransferase BIA1 [Source:UniProtKB/Swiss-Prot;Acc:O23393]
AT1G52800	311.447	527.935	94.958	2.475	0.000112589	0.00156362	up	1235		2-oxoglutarate (2OG) and Fe(II)-dependent oxygenase superfamily protein [Source:UniProtKB/TrEMBL;Acc:Q9C938]
AT3G47530	147.214	183.399	111.03	0.724039	0.00309435	0.0273194	up	2003	PCMP-H76	Pentatricopeptide repeat-containing protein At3g47530 [Source:UniProtKB/Swiss-Prot;Acc:Q9SN85]
AT1G23480	1182.15	1379	985.307	0.484971	0.00436322	0.0363171	up	2257	CSLA3	Glycosyltransferase (Fragment) [Source:UniProtKB/TrEMBL;Acc:W8Q7B4]
AT5G58940	839.832	1115.79	563.875	0.984619	1.74503e-08	4.80689e-07	up	2141	CRCK1	Calmodulin-binding receptor-like cytoplasmic kinase 1 [Source:UniProtKB/Swiss-Prot;Acc:Q9FIL7]
AT3G45260	192.4	235.076	149.725	0.650814	0.00444089	0.0368288	up	2004	BIB	Protein indeterminate-domain 9 [Source:UniProtKB/Swiss-Prot;Acc:Q944L3]
AT2G40670	56.5392	82.4524	30.6259	1.42881	0.00162156	0.0158308	up	1544	ARR16	Response regulator 16 [Source:UniProtKB/TrEMBL;Acc:F4II22]
AT3G54150	286.011	496.077	75.9446	2.70755	5.48583e-09	1.61618e-07	up	1169		Embryonic abundant protein-like [Source:UniProtKB/TrEMBL;Acc:Q9M389]
AT3G20130	572.03	733.798	410.263	0.838835	3.76037e-06	7.08158e-05	up	1882	CYP705A22	Cytochrome P450 705A22 [Source:UniProtKB/Swiss-Prot;Acc:Q9LJY5]
AT1G76470	87.756	122.791	52.721	1.21975	0.00362343	0.0311823	up	1421		NAD(P)-binding Rossmann-fold superfamily protein [Source:UniProtKB/TrEMBL;Acc:F4I2E5]
AT4G22950	398.237	595.522	200.951	1.56731	2.11203e-13	9.96717e-12	up	1017	AGL19	Agamous-like MADS-box protein AGL19 [Source:UniProtKB/Swiss-Prot;Acc:O82743]
AT1G08650	1376.99	1608.51	1145.47	0.489789	0.00296464	0.0263416	up	1322	PPCK1	Phosphoenolpyruvate carboxylase kinase 1 [Source:UniProtKB/Swiss-Prot;Acc:Q9SPK4]
AT2G31865	559.518	891.178	227.858	1.96758	3.68659e-26	4.498e-24	up	1957	PARG2	poly(ADP-ribose) glycohydrolase 2 [Source:TAIR;Acc:AT2G31865]
AT5G51830	3128.05	4281.85	1974.26	1.11692	0.00100649	0.010573	up	1663		Probable fructokinase-7 [Source:UniProtKB/Swiss-Prot;Acc:Q9FLH8]
AT4G09110	431.467	679.786	183.149	1.89207	1.34375e-22	1.28774e-20	up	1308	ATL35	Putative RING-H2 finger protein ATL35 [Source:UniProtKB/Swiss-Prot;Acc:Q9M0R6]
AT3G47730	6909.45	8747.26	5071.64	0.78638	5.66011e-07	1.23319e-05	up	3489	ABCA2	ATH1 [Source:UniProtKB/TrEMBL;Acc:A0A178V6R6]
AT1G29050	2181.48	2570.86	1792.1	0.520603	0.00121455	0.012374	up	1419	TBL38	Protein trichome birefringence-like 38 [Source:UniProtKB/Swiss-Prot;Acc:Q8VY22]
AT5G03390	132.144	196.839	67.4484	1.54516	0.000176375	0.00233536	up	1665		At5g03390 [Source:UniProtKB/TrEMBL;Acc:Q9LZF0]
AT1G20160	1370.5	1665.16	1075.83	0.630207	0.00290074	0.0258934	up	2498	CRSP	CO(2)-response secreted protease [Source:UniProtKB/Swiss-Prot;Acc:Q9LNU1]
AT1G61230	89.3068	116.414	62.1994	0.904294	0.00160749	0.0156996	up	1518		Mannose-binding lectin superfamily protein [Source:UniProtKB/TrEMBL;Acc:F4HTI1]
AT3G28380	27.6853	41.9339	13.4366	1.64194	0.000304568	0.00377138	up	3766	ABCB17	ABC transporter B family member 17 [Source:UniProtKB/Swiss-Prot;Acc:Q9LSJ6]
AT1G08050	1147.09	1580.04	714.144	1.14568	1.44201e-11	5.7341e-10	up	2490		T6D22.13 [Source:UniProtKB/TrEMBL;Acc:Q9LN03]
AT3G48940	164.267	225.7	102.833	1.1341	1.18536e-06	2.43019e-05	up	921		Remorin family protein [Source:UniProtKB/TrEMBL;Acc:Q9SMT2]
AT2G34940	423.547	500.876	346.217	0.532778	0.00569832	0.0455939	up	2109	VSR5	VSR5 [Source:UniProtKB/TrEMBL;Acc:A0A384KPH5]
AT2G25440	61.1879	114.341	8.03434	3.83103	7.65534e-19	5.61511e-17	up	2016	AtRLP20	Receptor-like protein 20 [Source:UniProtKB/Swiss-Prot;Acc:Q9SKK5]
AT1G03495	232.402	282.972	181.832	0.638051	0.00229176	0.0212681	up	1311		HXXXD-type acyl-transferase family protein [Source:TAIR;Acc:AT1G03495]
AT4G15610	7111.56	8445.27	5777.85	0.547611	0.00195754	0.0185673	up	1494		CASP-like protein 1D1 [Source:UniProtKB/Swiss-Prot;Acc:Q9FE29]
AT3G57157	1327.15	1810.51	843.789	1.10144	8.9096e-05	0.00127633	up	237		other RNA [Source:TAIR;Acc:AT3G57157]
AT2G32460	8.72602	15.8183	1.63373	3.27536	0.000444246	0.0052314	up	1832	MYB101	Transcription factor MYB101 [Source:UniProtKB/Swiss-Prot;Acc:O80883]
AT4G17615	634.669	744.148	525.189	0.502752	0.00608388	0.0482161	up	1384	CBL1	calcineurin B-like protein 1 [Source:TAIR;Acc:AT4G17615]
AT5G06730	364.904	483.496	246.312	0.973017	6.09626e-07	1.32132e-05	up	1423	PER54	Peroxidase 54 [Source:UniProtKB/Swiss-Prot;Acc:Q9FG34]
AT5G07460	948.753	1282.64	614.869	1.06076	6.30257e-10	2.12167e-08	up	1214	MRSA2	PMSR2 [Source:UniProtKB/TrEMBL;Acc:A0A178UBC0]
AT5G59930	346.315	471.737	220.894	1.09463	9.89715e-05	0.00140095	up	2323		Cysteine/Histidine-rich C1 domain family protein [Source:UniProtKB/TrEMBL;Acc:Q9FJE3]
AT3G13610	7801.65	12654.5	2948.79	2.10146	1.06829e-28	1.47625e-26	up	1470	F6'H1	Feruloyl CoA ortho-hydroxylase 1 [Source:UniProtKB/Swiss-Prot;Acc:Q9LHN8]
AT1G72940	140.2	176.216	104.184	0.758216	0.00164067	0.0159737	up	1785		At1g72940/F3N23_14 [Source:UniProtKB/TrEMBL;Acc:Q9SSN2]
AT5G11210	387.249	688.068	86.4305	2.99294	1.1666e-46	3.5584e-44	up	2993	GLR2.5	Glutamate receptor 2.5 [Source:UniProtKB/Swiss-Prot;Acc:Q9LFN5]
AT2G37700	231.156	296.05	166.263	0.832378	0.000107161	0.00149886	up	1874		Fatty acid hydroxylase superfamily [Source:TAIR;Acc:AT2G37700]
AT5G67430	218.308	339.571	97.0462	1.80697	0.00337744	0.0294548	up	1670		Acyl-CoA N-acyltransferases (NAT) superfamily protein [Source:UniProtKB/TrEMBL;Acc:Q9FN10]
AT3G08760	1810.02	2259.69	1360.35	0.732147	0.000125247	0.0017156	up	2554	ATSIK	ATSIK [Source:UniProtKB/TrEMBL;Acc:A0A384KX76]
AT1G77660	340.944	408.572	273.316	0.580019	0.00257682	0.0234454	up	1933		Histone H3 K4-specific methyltransferase SET7/9 family protein [Source:UniProtKB/TrEMBL;Acc:Q9CAP2]
AT1G49580	2083.44	2412.94	1753.94	0.460189	0.00382977	0.032615	up	2358	CRK8	CDPK-related kinase 8 [Source:UniProtKB/Swiss-Prot;Acc:Q9FX86]
AT1G09080	23.1844	41.8587	4.51018	3.21427	1.58651e-07	3.73299e-06	up	2105	MED37B	Probable mediator of RNA polymerase II transcription subunit 37b [Source:UniProtKB/Swiss-Prot;Acc:Q8H1B3]
AT4G19520	652.51	1011.44	293.585	1.78455	3.39597e-17	2.15086e-15	up	5608		Probable disease resistance protein At4g19520 [Source:UniProtKB/Swiss-Prot;Acc:F4JT82]
AT2G01300	169.117	306.82	31.4137	3.28793	1.09262e-36	2.2737e-34	up	915		Mediator of RNA polymerase II transcription subunit [Source:UniProtKB/TrEMBL;Acc:Q9ZU37]
AT4G30110	435.176	544.891	325.46	0.743485	6.8239e-05	0.00100874	up	3089	HMA2	Cadmium/zinc-transporting ATPase HMA2 [Source:UniProtKB/Swiss-Prot;Acc:Q9SZW4]
AT3G27473	88.92	113.727	64.1134	0.826871	0.00346148	0.0300203	up	2055		CHP-rich zinc finger protein-like [Source:UniProtKB/TrEMBL;Acc:Q9LTY3]
AT1G14580	264.545	353.417	175.673	1.00848	1.48688e-06	2.99918e-05	up	1845		C2H2-like zinc finger protein [Source:TAIR;Acc:AT1G14580]
AT1G50050	84.5759	120.641	48.5109	1.31434	6.22475e-06	0.000112821	up	730		CAP (Cysteine-rich secretory proteins, Antigen 5, and Pathogenesis-related 1 protein) superfamily protein [Source:UniProtKB/TrEMBL;Acc:F4I4X9]
AT4G14370	703.404	1055.18	351.629	1.58536	5.21044e-19	3.85572e-17	up	3435		Disease resistance protein (TIR-NBS-LRR class) family [Source:TAIR;Acc:AT4G14370]
AT1G08930	6636.38	8406.55	4866.2	0.788717	4.82218e-07	1.06831e-05	up	1954	ERD6	ERD6 [Source:UniProtKB/TrEMBL;Acc:A0A178W9Q9]
AT5G56960	46.8051	92.5731	1.03705	6.48003	3.69942e-20	2.9657e-18	up	1880		basic helix-loop-helix (bHLH) DNA-binding family protein [Source:TAIR;Acc:AT5G56960]
AT1G15790	234.639	312.309	156.969	0.992493	0.000228969	0.0029354	up	1067		unknown protein; BEST Arabidopsis thaliana protein match is: unknown protein (TAIR:AT1G15780.1); Ha. [Source:TAIR;Acc:AT1G15790]
AT3G16240	2096.94	2546.81	1647.07	0.628786	0.00361327	0.0311102	up	1189	TIP2-1	Aquaporin TIP2-1 [Source:UniProtKB/Swiss-Prot;Acc:Q41951]
AT3G49190	522.475	634.973	409.976	0.631157	0.000637331	0.007088	up	1727		O-acyltransferase (WSD1-like) family protein [Source:UniProtKB/TrEMBL;Acc:Q9M3B3]
AT2G23170	213.305	260.62	165.991	0.650848	0.00286839	0.0256819	up	2118	GH3.3	Indole-3-acetic acid-amido synthetase GH3.3 [Source:UniProtKB/Swiss-Prot;Acc:O22190]
AT4G28703	66.9954	89.3218	44.669	0.99974	0.00167494	0.0162504	up	754		RmlC-like cupins superfamily protein [Source:UniProtKB/TrEMBL;Acc:Q8LAH4]
AT3G07070	374.02	507.347	240.693	1.07578	0.00542693	0.0437442	up	1902	PBL26	Probable serine/threonine-protein kinase PBL26 [Source:UniProtKB/Swiss-Prot;Acc:Q9SFT7]
AT5G51465	53.7526	102.549	4.95628	4.37091	1.91989e-23	1.90556e-21	up	612
AT4G37640	2662.48	3096.36	2228.6	0.474436	0.00631063	0.049808	up	3708	ACA2	ACA2 [Source:UniProtKB/TrEMBL;Acc:A0A384LFJ2]
AT4G15330	560.957	843.703	278.211	1.60055	2.24278e-18	1.57133e-16	up	1762	CYP705A1	Cytochrome P450 705A1 [Source:UniProtKB/Swiss-Prot;Acc:Q0WQ07]
AT2G23770	1177.09	1500.45	853.722	0.813557	1.98053e-06	3.90979e-05	up	2507	LYK4	LysM domain receptor-like kinase 4 [Source:UniProtKB/Swiss-Prot;Acc:O64825]
AT3G46190	294.254	561.284	27.225	4.36573	3.49506e-16	2.08139e-14	up	960		TRAF-like family protein [Source:UniProtKB/TrEMBL;Acc:A0A1I9LN71]
AT5G01330	297.319	365.945	228.692	0.67822	0.000966473	0.0102256	up	2166	PDC3	Pyruvate decarboxylase 3 [Source:UniProtKB/Swiss-Prot;Acc:Q9M039]
AT3G47820	722.251	888.858	555.643	0.677795	0.000128387	0.00175196	up	2071	PUB39	RING-type E3 ubiquitin transferase [Source:UniProtKB/TrEMBL;Acc:A0A178V8W3]
AT5G07650	482.263	641.151	323.375	0.987456	9.8697e-08	2.41311e-06	up	2656		Actin-binding FH2 protein [Source:TAIR;Acc:AT5G07650]
AT3G17010	12.1243	20.2676	3.98107	2.34795	0.000948626	0.0100666	up	1262		B3 domain-containing protein At3g17010 [Source:UniProtKB/Swiss-Prot;Acc:Q9LSP6]
AT2G36100	2968.89	3489.16	2448.63	0.510906	0.00116161	0.0119417	up	904	CASP1	Casparian strip membrane protein 1 [Source:UniProtKB/Swiss-Prot;Acc:Q9SIH4]
AT5G36150	108.794	193.407	24.1811	2.99969	1.3684e-17	8.98334e-16	up	2367	PEN3	Tirucalladienol synthase [Source:UniProtKB/Swiss-Prot;Acc:Q9LVY2]
AT1G43140	117.665	160.679	74.6511	1.10595	6.48087e-05	0.000962586	up	2166		Putative cullin-like protein 1 [Source:UniProtKB/Swiss-Prot;Acc:P0CH31]
AT3G54720	1507.3	1860.72	1153.87	0.689377	4.03511e-05	0.000624543	up	2432	AMP1	Probable glutamate carboxypeptidase AMP1 [Source:UniProtKB/Swiss-Prot;Acc:Q9M1S8]
AT3G57460	12.621	21.7019	3.54015	2.61594	0.000614946	0.00686293	up	1510		Catalytic/ metal ion binding / metalloendopeptidase/ zinc ion binding protein [Source:UniProtKB/TrEMBL;Acc:F4J3D6]
AT4G04700	428.188	584.876	271.501	1.10717	5.25166e-06	9.64423e-05	up	1815	CPK27	Calcium-dependent protein kinase 27 [Source:UniProtKB/Swiss-Prot;Acc:Q9ZSA4]
AT5G20810	41.6249	57.7981	25.4518	1.18325	0.00184458	0.0176296	up	1315		SAUR-like auxin-responsive protein family [Source:UniProtKB/TrEMBL;Acc:Q2V359]
AT3G50160	5.73311	10.8194	0.646872	4.06399	0.00125345	0.0126826	up	2015		Transmembrane protein, putative (DUF247) [Source:UniProtKB/TrEMBL;Acc:Q45GK4]
AT2G30020	608.067	758.084	458.049	0.726855	0.00578997	0.0462089	up	1813		PP2C-type phosphatase AP2C1 [Source:UniProtKB/TrEMBL;Acc:F6LPR5]
AT4G34860	1014.36	1198.15	830.573	0.528625	0.00201505	0.0190406	up	2117	INVB	A/N-InvB [Source:UniProtKB/TrEMBL;Acc:A0A178V2X0]
AT5G14150	310.826	371.713	249.939	0.572611	0.00461203	0.0380086	up	1525		Emb [Source:UniProtKB/TrEMBL;Acc:Q9FMT6]
AT2G39210	950.769	1350.36	551.174	1.29277	4.61286e-14	2.30293e-12	up	2330		At2g39210/T16B24.15 [Source:UniProtKB/TrEMBL;Acc:O80960]
AT5G01640	244.663	402.61	86.7162	2.21501	4.96995e-24	5.15803e-22	up	1111	PRA1B5	PRA1 family protein [Source:UniProtKB/TrEMBL;Acc:A0A178UH31]
AT2G13810	701.933	1335.08	68.7855	4.27868	6.65259e-18	4.52159e-16	up	1571	ALD1	EDTS5 [Source:UniProtKB/TrEMBL;Acc:A0A178VQ02]
AT5G48410	673.832	915.262	432.403	1.08181	5.85676e-05	0.000875085	up	2726	GLR1.3	Glutamate receptor 1.3 [Source:UniProtKB/Swiss-Prot;Acc:Q9FH75]
AT2G04070	149.539	280.099	18.9788	3.88348	1.1811e-42	3.21106e-40	up	1716	DTX4	Protein DETOXIFICATION 4 [Source:UniProtKB/Swiss-Prot;Acc:Q9SIA3]
AT4G34419	56.7552	85.7555	27.7549	1.62749	1.92308e-06	3.80539e-05	up	751		Uncharacterized protein At4g34420 [Source:UniProtKB/TrEMBL;Acc:Q67YQ7]
AT3G60160	289.217	450.461	127.972	1.81557	1.97782e-09	6.20691e-08	up	5239	ABCC9	ABC transporter C family member 9 [Source:UniProtKB/Swiss-Prot;Acc:Q9M1C7]
AT4G19920	203.527	291.879	115.176	1.34154	1.17288e-06	2.40657e-05	up	1186		Toll-Interleukin-Resistance (TIR) domain family protein [Source:UniProtKB/TrEMBL;Acc:F4JU09]
AT4G02520	37.0777	59.7201	14.4352	2.04862	0.000737648	0.00808149	up	1471	GSTF2	Glutathione S-transferase F2 [Source:UniProtKB/Swiss-Prot;Acc:P46422]
AT1G24150	1136.48	1342.66	930.301	0.529322	0.00163164	0.0159044	up	2754	ATFH4	formin homologue 4 [Source:TAIR;Acc:AT1G24150]
AT5G37770	581.473	746.53	416.416	0.842173	0.000115197	0.001591	up	1323	CML24	TCH2 [Source:UniProtKB/TrEMBL;Acc:A0A178UBB8]
AT3G59370	626.636	823.084	430.188	0.936072	1.08768e-07	2.6387e-06	up	622		At3g59370 [Source:UniProtKB/TrEMBL;Acc:Q9LX34]
AT4G40090	1690.26	2334.31	1046.2	1.15784	0.00455016	0.037573	up	870	AGP3	AGP3 [Source:UniProtKB/TrEMBL;Acc:A0A178USX4]
AT4G01925	246.622	300.946	192.298	0.646159	0.00226878	0.0210798	up	991		Cysteine/Histidine-rich C1 domain family protein [Source:UniProtKB/TrEMBL;Acc:F4JH56]
AT3G11340	5989.72	8009.75	3969.7	1.01273	1.6268e-10	5.80451e-09	up	1730	UGT76B1	UDP-glycosyltransferase 76B1 [Source:UniProtKB/Swiss-Prot;Acc:Q9C768]
AT4G27460	152.827	213.612	92.0419	1.21463	0.000152593	0.00204977	up	1551	CBSX5	CBSX5 [Source:UniProtKB/TrEMBL;Acc:A0A178V3C0]
AT4G38390	258.336	353.284	163.389	1.11252	7.76565e-07	1.65165e-05	up	1922	RHS17	RHS17 [Source:UniProtKB/TrEMBL;Acc:A0A178V2M6]
AT3G06460	509.013	609.77	408.256	0.578791	0.00179361	0.0172214	up	1109		F24P17.4 protein [Source:UniProtKB/TrEMBL;Acc:Q9SQU9]
AT2G26410	364.226	499.686	228.767	1.12714	0.000611148	0.00683022	up	2197	Iqd4	IQ-domain 4 [Source:UniProtKB/TrEMBL;Acc:F4IUJ7]
AT2G16005	1405.44	1908.68	902.207	1.08105	0.00114488	0.0118086	up	819	ROSY1	MD-2-related lipid-recognition protein ROSY1 [Source:UniProtKB/Swiss-Prot;Acc:Q9AST8]
AT2G30550	656.1	874.482	437.718	0.998427	0.000192104	0.00250909	up	2095		Phospholipase A1-Igamma2, chloroplastic [Source:UniProtKB/Swiss-Prot;Acc:Q3EBR6]
AT5G62330	85.7323	131.746	39.7185	1.72988	2.02752e-08	5.53025e-07	up	623		BEST Arabidopsis thaliana protein match is: Plant invertase/pectin methylesterase inhibitor superfamily protein (TAIR:AT5G62340.1); Ha. [Source:TAIR;Acc:AT5G62330]
AT1G74770	3818.33	4655.23	2981.43	0.642849	5.01002e-05	0.000758998	up	4273		Zinc finger protein BRUTUS-like At1g74770 [Source:UniProtKB/Swiss-Prot;Acc:F4HVS0]
[truncated: 1,172 more rows]

## Sheet: hy5-covered
Up-regulated and down-regulated genes in hy5- covered, hy5-illuminated and WT-covered compared to the WT-illuminated
geneId	baseMean	hy5-covered_baseMean	WT-illuminated_baseMean	log2FoldChange	pval	padj	bDiff	gene length	gene name	description
AT2G34630	1534.72	1250.27	1819.16	-0.541031	0.00195689	0.0156228	down	1589	SPS3	Solanesyl diphosphate synthase 3, chloroplastic/mitochondrial [Source:UniProtKB/Swiss-Prot;Acc:Q5HZ00]
AT3G13740	319.049	246.12	391.979	-0.671412	0.00195954	0.015634	down	1317		Ribonuclease III family protein [Source:UniProtKB/TrEMBL;Acc:A0A1I9LL75]
AT2G40840	1679.47	1286.34	2072.6	-0.688162	0.000114303	0.00126891	down	3409	DPE2	4-alpha-glucanotransferase DPE2 [Source:UniProtKB/Swiss-Prot;Acc:Q8RXD9]
AT4G09750	564.459	36.0306	1092.89	-4.92278	1.53894e-34	2.15796e-32	down	1232		NAD(P)-binding Rossmann-fold superfamily protein [Source:UniProtKB/TrEMBL;Acc:Q9SZ91]
AT5G53970	367.622	277.053	458.191	-0.725787	0.000345996	0.00340035	down	1665		Probable aminotransferase TAT2 [Source:UniProtKB/Swiss-Prot;Acc:Q9FN30]
AT4G29270	3823.31	3070.8	4575.82	-0.575417	0.00112264	0.00963358	down	991		Acid phosphatase-like protein [Source:UniProtKB/TrEMBL;Acc:Q9M0F4]
AT1G46480	431.138	290.359	571.916	-0.977963	0.00167818	0.0136583	down	1405	WOX4	WOX4 [Source:UniProtKB/TrEMBL;Acc:A0A384KVK6]
AT3G04260	334.607	227.061	442.153	-0.96147	4.4138e-06	6.5905e-05	down	3082	PTAC3	Plastid transcriptionally active 3 [Source:UniProtKB/TrEMBL;Acc:F4J3M2]
AT3G16140	89.2378	4.86607	173.61	-5.15695	8.69207e-39	1.56958e-36	down	1300	PSAH1	Photosystem I reaction center subunit VI-1, chloroplastic [Source:UniProtKB/Swiss-Prot;Acc:Q9SUI7]
AT2G01320	336.67	203.41	469.93	-1.20806	1.856e-08	4.08288e-07	down	2611		ABCG7 [Source:UniProtKB/TrEMBL;Acc:A0A178VSW5]
AT2G47840	771.833	563.092	980.575	-0.800258	2.86256e-05	0.000361879	down	815	TIC20-II	Tic20-II [Source:UniProtKB/TrEMBL;Acc:A0A178VYR0]
AT2G21960	214.236	7.11624	421.355	-5.88778	4.8952e-36	7.50168e-34	down	1280		Expressed protein [Source:UniProtKB/TrEMBL;Acc:Q9SJ03]
AT4G20130	262.189	168.917	355.461	-1.07338	7.2495e-06	0.000104098	down	1664	PTAC14	Protein PLASTID TRANSCRIPTIONALLY ACTIVE 14 [Source:UniProtKB/Swiss-Prot;Acc:Q84JF5]
AT3G10450	259.595	84.4579	434.732	-2.36382	7.38041e-13	2.81105e-11	down	1681	SCPL7	SCPL7 [Source:UniProtKB/TrEMBL;Acc:A0A178VAE4]
AT4G13530	1799.44	1342.63	2256.25	-0.748867	0.00456331	0.0321829	down	1456		Transmembrane protein [Source:UniProtKB/TrEMBL;Acc:Q67ZR8]
AT3G13180	255.199	191.003	319.395	-0.741744	0.000929868	0.00815788	down	2098		NOL1/NOP2/sun family protein / antitermination NusB domain-containing protein [Source:UniProtKB/TrEMBL;Acc:Q8VYC4]
AT3G47070	118.703	13.4248	223.98	-4.0604	2.07685e-35	3.08455e-33	down	1142		Thylakoid soluble phosphoprotein [Source:UniProtKB/TrEMBL;Acc:Q9SD66]
AT3G12580	4898.62	2041.77	7755.47	-1.92539	0.00301105	0.0226483	down	2520	MED37C	Probable mediator of RNA polymerase II transcription subunit 37c [Source:UniProtKB/Swiss-Prot;Acc:Q9LHA8]
AT2G26500	221.486	18.1632	424.808	-4.54772	8.15628e-58	2.88342e-55	down	667		At2g26500/T9J22.17 [Source:UniProtKB/TrEMBL;Acc:O48717]
AT2G38465	139.835	67.387	212.282	-1.65544	9.99459e-06	0.00013906	down	563		Expressed protein [Source:UniProtKB/TrEMBL;Acc:Q8S8P4]
AT1G52000	10.4112	1.91703	18.9053	-3.30185	0.000160257	0.00171761	down	2567	JAL5	Jacalin-related lectin 5 [Source:UniProtKB/Swiss-Prot;Acc:Q9ZU23]
AT5G08400	84.126	61.2553	106.997	-0.804659	0.00630701	0.042256	down	1751		At5g08400/F8L15_130 [Source:UniProtKB/TrEMBL;Acc:Q8VZD1]
AT4G23630	6157.09	5041.01	7273.16	-0.528871	0.00207531	0.0164064	down	1988	RTNLB1	Reticulon-like protein [Source:UniProtKB/TrEMBL;Acc:A0A178V247]
AT1G62750	1438.54	294.265	2582.81	-3.13375	4.57506e-20	3.20765e-18	down	2666	CPEFG	Elongation factor G, chloroplastic [Source:UniProtKB/Swiss-Prot;Acc:Q9SI75]
AT2G02100	9223.4	5964.07	12482.7	-1.06556	1.15653e-09	3.06535e-08	down	753	PDF2.2	PDF2.2 [Source:UniProtKB/TrEMBL;Acc:A0A178VVN9]
AT1G71500	413.579	111.98	715.178	-2.67506	4.96896e-34	6.89066e-32	down	1242		Rieske (2Fe-2S) domain-containing protein [Source:UniProtKB/TrEMBL;Acc:Q9C9I7]
AT4G39360	37.9544	18.0774	57.8315	-1.67767	0.00192158	0.0153604	down	850		At4g39360 [Source:UniProtKB/TrEMBL;Acc:Q5Q0B1]
AT4G37930	1202.83	494.768	1910.88	-1.94941	3.19117e-25	3.00848e-23	down	1989	SHM1	Serine hydroxymethyltransferase 1, mitochondrial [Source:UniProtKB/Swiss-Prot;Acc:Q9SZJ5]
AT1G66830	35.3913	16.974	53.8087	-1.66452	0.00142038	0.0118483	down	2963		Probable inactive leucine-rich repeat receptor-like protein kinase At1g66830 [Source:UniProtKB/Swiss-Prot;Acc:Q9C9N5]
AT2G20260	169.727	15.0403	324.415	-4.43094	2.60891e-49	6.89302e-47	down	607	PSAE2	Photosystem I reaction center subunit IV B, chloroplastic [Source:UniProtKB/Swiss-Prot;Acc:Q9S714]
AT5G43630	1423.32	101.933	2744.71	-4.75097	8.90098e-106	2.03104e-102	down	3202	TZP	Zinc knuckle (CCHC-type) family protein [Source:UniProtKB/TrEMBL;Acc:Q9FIX7]
AT4G26050	31.4939	17.4916	45.4962	-1.37908	0.00144134	0.011985	down	1772	PIRL8	Plant intracellular Ras-group-related LRR protein 8 [Source:UniProtKB/Swiss-Prot;Acc:Q8RWE5]
AT2G27060	569.573	384.418	754.728	-0.973281	0.000271247	0.00273976	down	3660		Leucine-rich repeat protein kinase family protein [Source:UniProtKB/TrEMBL;Acc:F4IVP3]
AT5G65700	5428.27	4208.42	6648.13	-0.659672	0.000128013	0.00140495	down	3520	BAM1	Leucine-rich repeat receptor-like serine/threonine-protein kinase BAM1 [Source:UniProtKB/Swiss-Prot;Acc:O49545]
AT1G78750	12.8633	1.68838	24.0382	-3.83162	2.50767e-06	3.89979e-05	down	1746		F-box/FBD/LRR-repeat protein At1g78750 [Source:UniProtKB/Swiss-Prot;Acc:Q9ZV93]
AT5G66420	3369.1	2671.9	4066.29	-0.605849	0.000434015	0.00415317	down	2471		AT5G66420 protein [Source:UniProtKB/TrEMBL;Acc:Q9FJZ7]
AT3G49470	639.742	526.133	753.352	-0.517897	0.00764269	0.0496201	down	901	NACA2	Nascent polypeptide-associated complex subunit alpha-like protein 2 [Source:UniProtKB/TrEMBL;Acc:A0A1I9LR04]
AT5G24570	58.9011	38.112	79.6902	-1.06416	0.00152696	0.0125992	down	452		Putative uncharacterized protein [Source:UniProtKB/TrEMBL;Acc:Q9FLU6]
AT3G07670	282.673	150.63	414.716	-1.46111	5.52301e-11	1.72422e-09	down	2090		Putative ribulose-1,5-bisphosphate carboxylase/oxygenase small subunit N-methyltransferase I [Source:UniProtKB/TrEMBL;Acc:Q9S7D2]
AT2G46420	356.071	7.50137	704.64	-6.55359	5.63581e-54	1.76823e-51	down	2221		At2g46420/F11C10.11 [Source:UniProtKB/TrEMBL;Acc:Q9SKD8]
AT4G05180	237.646	46.3102	428.982	-3.21152	1.49741e-37	2.48907e-35	down	1115	PSBQ2	Oxygen-evolving enhancer protein 3-2, chloroplastic [Source:UniProtKB/Swiss-Prot;Acc:Q41932]
AT4G08920	1336.02	988.473	1683.58	-0.768257	0.000406344	0.00392278	down	3018	CRY1	Cryptochrome-1 [Source:UniProtKB/Swiss-Prot;Acc:Q43125]
AT1G11840	14154.2	10854.2	17454.3	-0.685333	4.84611e-05	0.000582276	down	1453	ATGLX1
AT2G28000	4093.68	3403.2	4784.16	-0.491373	0.00438131	0.0310565	down	2222	CPN60A1	SLP [Source:UniProtKB/TrEMBL;Acc:A0A178VZW6]
AT5G15970	1328.43	93.6151	2563.24	-4.77508	2.59931e-49	6.89302e-47	down	750	KIN2	KIN2 [Source:UniProtKB/TrEMBL;Acc:A0A384KRF8]
AT2G41370	185.918	52.3518	319.484	-2.60943	8.33898e-25	7.55626e-23	down	2174	NPR5	Regulatory protein NPR5 [Source:UniProtKB/Swiss-Prot;Acc:Q9ZVC2]
AT3G47620	1384.02	970.959	1797.09	-0.888177	1.17162e-05	0.000160522	down	2467	TCP14	Transcription factor TCP14 [Source:UniProtKB/Swiss-Prot;Acc:Q93Z00]
AT5G01930	434.541	337.006	532.075	-0.658858	0.00111089	0.0095589	down	1489	MAN6	Mannan endo-1,4-beta-mannosidase 6 [Source:UniProtKB/Swiss-Prot;Acc:Q9LZV3]
AT5G40390	3383.36	2354.39	4412.33	-0.906186	1.88163e-07	3.51748e-06	down	2991	RFS5	Probable galactinol--sucrose galactosyltransferase 5 [Source:UniProtKB/Swiss-Prot;Acc:Q9FND9]
AT1G16850	121.032	64.089	177.975	-1.47353	3.2411e-08	6.87092e-07	down	894		At1g16880 [Source:UniProtKB/TrEMBL;Acc:Q9FE54]
AT1G35720	18977.4	11820.9	26133.9	-1.14459	2.75832e-09	6.94423e-08	down	1390	ANN1	Annexin [Source:UniProtKB/TrEMBL;Acc:A0A178WGZ8]
AT1G23740	78.2387	4.14415	152.333	-5.20001	5.62169e-35	8.15633e-33	down	1471	AOR	NADPH-dependent alkenal/one oxidoreductase, chloroplastic [Source:UniProtKB/Swiss-Prot;Acc:Q9ZUC1]
AT1G10910	530.794	430.495	631.094	-0.551858	0.00612663	0.0411833	down	2355		Pentatricopeptide repeat-containing protein At1g10910, chloroplastic [Source:UniProtKB/Swiss-Prot;Acc:Q0WVV0]
AT5G16540	285.327	127.631	443.023	-1.79541	9.76426e-16	4.86275e-14	down	1659	ZFN3	Zinc finger CCCH domain-containing protein 57 [Source:UniProtKB/Swiss-Prot;Acc:Q8L7N8]
AT1G15980	13.7897	2.42542	25.1539	-3.37448	0.000912658	0.00803779	down	1719	PNSB1	Photosynthetic NDH subunit of subcomplex B 1, chloroplastic [Source:UniProtKB/Swiss-Prot;Acc:Q9S9N6]
AT5G24770	3841.58	1149.24	6533.91	-2.50727	2.77027e-42	5.60756e-40	down	1465	VSP2	Vegetative storage protein 2 [Source:UniProtKB/Swiss-Prot;Acc:O82122]
AT4G18050	364.007	245.274	482.741	-0.976859	0.00107369	0.0092898	down	4060	PGP9	P-glycoprotein 9 [Source:TAIR;Acc:AT4G18050]
AT3G16520	494.917	171.82	818.013	-2.25122	3.93902e-11	1.24364e-09	down	1977	UGT88A1	UDP-glycosyltransferase 88A1 [Source:UniProtKB/Swiss-Prot;Acc:Q9LK73]
AT3G63490	678.698	398.243	959.152	-1.26811	6.86723e-11	2.11754e-09	down	1437	RPL1	50S ribosomal protein L1, chloroplastic [Source:UniProtKB/Swiss-Prot;Acc:Q9LY66]
AT1G52870	249.087	12.2895	485.884	-5.30511	9.23217e-18	5.53049e-16	down	1576		At1g52870/F14G24_14 [Source:UniProtKB/TrEMBL;Acc:Q9C933]
AT5G60850	749.676	412.212	1087.14	-1.39908	4.29886e-05	0.000522525	down	1873	DOF5.4	OBP4 [Source:UniProtKB/TrEMBL;Acc:A0A178UF84]
AT5G08650	465.712	320.006	611.418	-0.93406	4.31242e-06	6.46219e-05	down	2582		Translation factor GUF1 homolog, chloroplastic [Source:UniProtKB/TrEMBL;Acc:A0A178USI8]
AT3G10160	745.08	588.94	901.221	-0.61376	0.000967514	0.00844388	down	2427	FPGS2	Folylpolyglutamate synthase [Source:UniProtKB/Swiss-Prot;Acc:F4J2K2]
AT3G01590	1047.56	780.372	1314.74	-0.752543	6.26782e-05	0.000734465	down	1577		Glucose-6-phosphate 1-epimerase [Source:UniProtKB/TrEMBL;Acc:Q9SS96]
AT5G07680	1205.09	723.45	1686.73	-1.22127	1.28652e-09	3.38487e-08	down	1409	NAC079	NAC4 [Source:UniProtKB/TrEMBL;Acc:A0A178UL34]
AT3G43670	1795.14	1286.52	2303.75	-0.840507	2.78998e-06	4.30415e-05	down	2391		Amine oxidase [Source:UniProtKB/TrEMBL;Acc:Q9M2B9]
AT3G45780	839.844	424.052	1255.64	-1.5661	3.87273e-16	2.01671e-14	down	3450	PHOT1	RPT1 [Source:UniProtKB/TrEMBL;Acc:A0A178VFT4]
AT1G01060	100.55	43.8668	157.234	-1.84171	2.00721e-10	5.88562e-09	down	2671	LHY	LHY1 [Source:UniProtKB/TrEMBL;Acc:A0A178W761]
AT3G04420	123.778	4.83649	242.719	-5.64918	3.8038e-51	1.08495e-48	down	1224	anac048	AT3g04420/T27C4_6 [Source:UniProtKB/TrEMBL;Acc:Q8W4R4]
AT1G78490	126.844	21.3489	232.339	-3.444	1.0044e-06	1.66956e-05	down	3256	CYP708A3	CYP708A3 [Source:UniProtKB/TrEMBL;Acc:A0A178WMR8]
AT2G04090	483.644	312.69	654.599	-1.06588	1.85119e-07	3.46495e-06	down	1805	DTX5	Protein DETOXIFICATION 5 [Source:UniProtKB/Swiss-Prot;Acc:Q9SIA1]
AT1G55490	1899.96	1241.39	2558.53	-1.04336	5.07854e-09	1.22333e-07	down	2276	CPN60B1	LEN1 [Source:UniProtKB/TrEMBL;Acc:A0A178W724]
AT2G47630	1242.06	999.671	1484.44	-0.570397	0.00238876	0.0185456	down	1442		Alpha/beta-Hydrolases superfamily protein [Source:UniProtKB/TrEMBL;Acc:O22248]
AT2G47180	1531.66	1115.85	1947.47	-0.803461	0.00142758	0.0118965	down	1392	GOLS1	Galactinol synthase 1 [Source:UniProtKB/Swiss-Prot;Acc:O22893]
AT3G54210	643.593	413.488	873.698	-1.07929	3.53398e-08	7.45403e-07	down	997	RPL17	50S ribosomal protein L17, chloroplastic [Source:UniProtKB/Swiss-Prot;Acc:Q9M385]
AT2G36885	412.632	278.369	546.895	-0.974267	1.43961e-06	2.33728e-05	down	1000		Expressed protein [Source:UniProtKB/TrEMBL;Acc:Q8S8F1]
AT2G37130	12387.9	5886.77	18889	-1.682	3.17058e-05	0.000397114	down	1358	PER21	Peroxidase 21 [Source:UniProtKB/Swiss-Prot;Acc:Q42580]
AT1G73885	326.101	63.7421	588.46	-3.20663	1.87783e-12	6.84087e-11	down	579		unknown protein; FUNCTIONS IN: molecular_function unknown; INVOLVED IN: biological_process unknown; LOCATED IN: chloroplast thylakoid membrane, chloroplast; Ha. [Source:TAIR;Acc:AT1G73885]
AT5G14700	155.363	108.639	202.087	-0.895426	0.00404571	0.0290135	down	1661		Cinnamoyl CoA reductase-like protein [Source:UniProtKB/TrEMBL;Acc:Q9LYJ0]
AT2G38370	471.918	362.313	581.524	-0.682603	0.000798293	0.00715102	down	2086		Plant protein of unknown function (DUF827) [Source:TAIR;Acc:AT2G38370]
AT1G25440	147.12	5.7683	288.472	-5.64414	1.1181e-09	2.96662e-08	down	1737	COL16	Zinc finger protein CONSTANS-LIKE 16 [Source:UniProtKB/Swiss-Prot;Acc:Q8RWD0]
AT1G04350	104.392	75.5528	133.23	-0.818365	0.00366336	0.0267298	down	2066		1-aminocyclopropane-1-carboxylate oxidase homolog 6 [Source:UniProtKB/Swiss-Prot;Acc:P93824]
AT3G46780	113.1	5.24038	220.959	-5.39796	2.33886e-18	1.46033e-16	down	1865	PTAC16	Protein PLASTID TRANSCRIPTIONALLY ACTIVE 16, chloroplastic [Source:UniProtKB/Swiss-Prot;Acc:Q9STF2]
AT3G55290	416.285	181.833	650.737	-1.83946	1.07076e-06	1.76815e-05	down	1145		NAD(P)-binding Rossmann-fold superfamily protein [Source:UniProtKB/TrEMBL;Acc:Q94AL3]
AT2G23390	553.327	349.888	756.766	-1.11295	7.57643e-06	0.000108358	down	1853		Acyl-CoA [Source:UniProtKB/TrEMBL;Acc:O80456]
AT3G55120	3994.15	22.8907	7965.4	-8.44284	1.945e-32	2.55599e-30	down	1112	CHI1	Chalcone--flavonone isomerase 1 [Source:UniProtKB/Swiss-Prot;Acc:P41088]
AT2G21730	3.80473	0	7.60945	#NAME?	0.00214741	0.0168859	down	1809	CAD2	Cinnamyl alcohol dehydrogenase 2 [Source:UniProtKB/Swiss-Prot;Acc:Q9SJ25]
AT5G48570	309.453	225.187	393.718	-0.806039	0.000250569	0.00255246	down	2211	FKBP65	Peptidyl-prolyl cis-trans isomerase FKBP65 [Source:UniProtKB/Swiss-Prot;Acc:Q9FJL3]
AT4G22990	61.561	32.1526	90.9693	-1.50044	0.000296971	0.00297445	down	2563		Major Facilitator Superfamily with SPX (SYG1/Pho81/XPR1) domain-containing protein [Source:UniProtKB/TrEMBL;Acc:F4JMQ7]
AT1G51110	31.9779	7.77549	56.1802	-2.85306	3.26027e-09	8.15881e-08	down	1490	PAP12	Probable plastid-lipid-associated protein 12, chloroplastic [Source:UniProtKB/Swiss-Prot;Acc:Q8LAP6]
AT4G27820	124.73	85.9052	163.554	-0.928947	0.000540184	0.00505165	down	1779	BGLU9	Beta-glucosidase 9 [Source:UniProtKB/Swiss-Prot;Acc:Q9STP4]
AT5G11260	1326.8	280.579	2373.02	-3.08025	7.63221e-45	1.72584e-42	down	1094	HY5	Basic-leucine zipper (bZIP) transcription factor family protein [Source:TAIR;Acc:AT5G11260]
AT5G59960	1867.61	1358.47	2376.74	-0.806997	0.000406552	0.00392328	down	1811		unknown protein; FUNCTIONS IN: molecular_function unknown; INVOLVED IN: biological_process unknown; LOCATED IN: nucleus; EXPRESSED IN: 24 plant structures; EXPRESSED DURING: 15 growth stages; Ha. [Source:TAIR;Acc:AT5G59960]
AT2G35450	278.612	217.835	339.389	-0.639702	0.00340954	0.0251724	down	1825		Catalytic/ hydrolase [Source:UniProtKB/TrEMBL;Acc:Q682E0]
AT4G29680	1375.85	1129.18	1622.51	-0.522946	0.00332493	0.0246619	down	2205		Alkaline-phosphatase-like family protein [Source:UniProtKB/TrEMBL;Acc:Q9SU83]
AT4G09650	315.368	143.328	487.407	-1.76581	5.33703e-16	2.7283e-14	down	1151	ATPD	PDE332 [Source:UniProtKB/TrEMBL;Acc:A0A178V1L3]
AT4G30993	285.518	220.427	350.61	-0.669569	0.00228025	0.0178078	down	1899		Calcineurin-like metallo-phosphoesterase superfamily protein [Source:UniProtKB/TrEMBL;Acc:Q8GW42]
AT4G06744	4182.77	3022.87	5342.67	-0.82164	1.99211e-06	3.14477e-05	down	1922		Uncharacterized protein At4g06744 [Source:UniProtKB/Swiss-Prot;Acc:Q8W3M4]
AT2G45630	112.074	65.562	158.586	-1.27433	0.00041218	0.00396996	down	1144		D-isomer specific 2-hydroxyacid dehydrogenase family protein [Source:UniProtKB/TrEMBL;Acc:Q67Y01]
AT4G34190	258.592	65.4233	451.761	-2.78768	1.67238e-22	1.31589e-20	down	939	2019-09-01	Stress enhanced protein 1, chloroplastic [Source:UniProtKB/Swiss-Prot;Acc:Q9M7I9]
AT3G16770	1775.3	754.699	2795.89	-1.88934	0.000156401	0.00168195	down	1306	RAP2-3	Ethylene-responsive transcription factor RAP2-3 [Source:UniProtKB/Swiss-Prot;Acc:P42736]
AT1G32160	300.988	232.025	369.951	-0.673052	0.00210585	0.0166112	down	1465		At1g32160/F3C3_6 [Source:UniProtKB/TrEMBL;Acc:Q9FVR1]
AT5G42240	343.361	245.715	441.007	-0.843812	9.68545e-05	0.00108623	down	2361	SCPL42	Serine carboxypeptidase-like 42 [Source:UniProtKB/Swiss-Prot;Acc:Q9FH05]
AT4G12500	10.0311	0.374313	19.6879	-5.71692	4.58175e-07	8.11016e-06	down	966		pEARLI1-like lipid transfer protein 3 [Source:UniProtKB/Swiss-Prot;Acc:Q9SU33]
AT2G03440	1611.08	1192.97	2029.18	-0.766337	0.00131768	0.0110837	down	1097	NRP1	Nodulin-related protein 1 [Source:UniProtKB/Swiss-Prot;Acc:Q9ZQ80]
AT4G13670	233.691	152.931	314.452	-1.03996	6.53335e-06	9.46261e-05	down	1373	PTAC5	Protein disulfide isomerase pTAC5, chloroplastic [Source:UniProtKB/Swiss-Prot;Acc:A1A6M1]
AT1G50450	134.41	23.5874	245.232	-3.37806	2.95602e-30	3.60175e-28	down	1559		At1g50450/F11F12_20 [Source:UniProtKB/TrEMBL;Acc:Q94BZ0]
AT1G32470	177.953	14.9356	340.971	-4.51282	4.00459e-51	1.12938e-48	down	829	GDH3	Glycine cleavage system H protein 3, mitochondrial [Source:UniProtKB/Swiss-Prot;Acc:Q9LQL0]
AT5G28750	319.471	247.6	391.341	-0.660417	0.00195504	0.0156129	down	663	TATA	Sec-independent protein translocase protein TATA, chloroplastic [Source:UniProtKB/Swiss-Prot;Acc:Q9LKU2]
AT3G26085	277.77	166.238	389.303	-1.22764	1.08413e-07	2.11435e-06	down	1210		CAAX amino terminal protease family protein [Source:UniProtKB/TrEMBL;Acc:A8MRZ2]
AT5G07190	110.736	1.10418	220.368	-7.6408	6.73102e-27	6.67781e-25	down	1038	ATS3	Embryo-specific protein ATS3 [Source:UniProtKB/Swiss-Prot;Acc:Q9LYP6]
AT2G24060	209.359	124.122	294.596	-1.24698	1.23949e-07	2.39317e-06	down	1508	IF3-2	Translation initiation factor IF3-2, chloroplastic [Source:UniProtKB/Swiss-Prot;Acc:O82234]
AT5G57630	1704.42	1193.09	2215.75	-0.89309	5.95144e-07	1.02526e-05	down	1740	CIPK21	CBL-interacting serine/threonine-protein kinase 21 [Source:UniProtKB/Swiss-Prot;Acc:Q94CG0]
AT1G05190	460.455	192.548	728.363	-1.91944	4.19584e-20	2.95002e-18	down	1051	RPL6	50S ribosomal protein L6, chloroplastic [Source:UniProtKB/Swiss-Prot;Acc:O23049]
AT5G67370	119.094	85.4795	152.709	-0.837132	0.00170731	0.0138595	down	1553	CGLD27	Protein CONSERVED IN THE GREEN LINEAGE AND DIATOMS 27, chloroplastic [Source:UniProtKB/Swiss-Prot;Acc:Q9FN15]
AT2G33250	315.604	37.4711	593.737	-3.98597	3.37325e-46	8.1412e-44	down	1058		At2g33250/F25I18.1 [Source:UniProtKB/TrEMBL;Acc:O22777]
AT2G26330	35.0319	13.0043	57.0596	-2.13348	0.00756816	0.0492509	down	3985	ERECTA	LRR receptor-like serine/threonine-protein kinase ERECTA [Source:UniProtKB/Swiss-Prot;Acc:Q42371]
AT5G24314	135.604	69.6844	201.523	-1.53204	8.63114e-09	2.01428e-07	down	726	PTAC7	plastid transcriptionally active7 [Source:TAIR;Acc:AT5G24314]
AT3G50700	448.506	253.93	643.082	-1.34057	4.55208e-05	0.000549842	down	2117	GAF1	Protein indeterminate-domain 2 [Source:UniProtKB/Swiss-Prot;Acc:Q9SCQ6]
AT1G09850	628.462	322.686	934.239	-1.53366	5.37517e-15	2.49846e-13	down	1752	XBCP3	At1g09850 [Source:UniProtKB/TrEMBL;Acc:Q0WVJ5]
AT3G06778	232.246	173.298	291.195	-0.748734	0.00373117	0.0271535	down	1023		Chaperone DnaJ-domain superfamily protein [Source:UniProtKB/TrEMBL;Acc:F4JC50]
AT1G70700	85.0166	36.2556	133.778	-1.88356	0.00098615	0.00859159	down	1425	JAZ9	TIFY7 [Source:UniProtKB/TrEMBL;Acc:A0A178WMP7]
AT4G30650	1292.04	595.931	1988.15	-1.73821	3.53567e-09	8.76064e-08	down	837		UPF0057 membrane protein At4g30650 [Source:UniProtKB/Swiss-Prot;Acc:Q9M095]
AT2G05310	79.4624	2.87477	156.05	-5.76242	1.86605e-38	3.27537e-36	down	912		Expressed protein [Source:UniProtKB/TrEMBL;Acc:Q9SJ31]
AT4G33670	241.008	176.319	305.697	-0.793912	0.000532742	0.00499695	down	1292	LGALDH	L-galactose dehydrogenase [Source:UniProtKB/Swiss-Prot;Acc:O81884]
AT2G36390	1349.08	1078.23	1619.93	-0.587273	0.00129996	0.0109457	down	2801	SBE2.1	SBE2.1 [Source:UniProtKB/TrEMBL;Acc:A0A178VXI8]
AT5G16010	520.558	98.5357	942.58	-3.2579	1.87273e-12	6.83507e-11	down	1147		3-oxo-5-alpha-steroid 4-dehydrogenase family protein [Source:UniProtKB/TrEMBL;Acc:Q9LFS3]
AT2G27680	325.886	220.893	430.878	-0.963933	7.23117e-06	0.000103953	down	1515		At2g27680/F15K20.22 [Source:UniProtKB/TrEMBL;Acc:Q9ZUX0]
AT1G19150	3.24422	0	6.48844	#NAME?	0.00473382	0.0332082	down	1162	LHCA6	Photosystem I chlorophyll a/b-binding protein 6, chloroplastic [Source:UniProtKB/Swiss-Prot;Acc:Q8LCQ4]
AT5G14320	441.456	197.619	685.293	-1.794	3.22918e-13	1.26843e-11	down	1203	RPS13	30S ribosomal protein S13, chloroplastic [Source:UniProtKB/Swiss-Prot;Acc:P42732]
AT1G12900	210.596	11.1472	410.045	-5.20103	4.19123e-41	7.96969e-39	down	1461	GAPA-2	glyceraldehyde 3-phosphate dehydrogenase A subunit 2 [Source:TAIR;Acc:AT1G12900]
AT4G26150	8.32971	0.374313	16.2851	-5.44316	0.000214253	0.0022158	down	1632	GATA22	Putative GATA transcription factor 22 [Source:UniProtKB/Swiss-Prot;Acc:Q9SZI6]
AT3G50270	7.20761	0.355552	14.0597	-5.30536	4.36653e-05	0.000530101	down	1711		Anthranilate N-hydroxycinnamoyl/benzoyltransferase-like protein [Source:UniProtKB/TrEMBL;Acc:Q9SNE0]
AT4G24790	501.908	363.283	640.534	-0.818183	3.8055e-05	0.000467996	down	3398		Protein STICHEL-like 2 [Source:UniProtKB/Swiss-Prot;Acc:F4JRP8]
AT5G02120	32.2549	2.04393	62.4658	-4.93365	6.72878e-17	3.71192e-15	down	526	OHP1	Light-harvesting complex-like protein OHP1, chloroplastic [Source:UniProtKB/Swiss-Prot;Acc:O81208]
AT3G08740	290.391	176.52	404.263	-1.19546	1.11753e-07	2.17442e-06	down	1020		Elongation factor P (EF-P) family protein [Source:UniProtKB/TrEMBL;Acc:Q8VZW6]
AT3G43540	336.742	266.982	406.503	-0.606525	0.00509027	0.0352847	down	1590		Initiation factor 4F subunit (DUF1350) [Source:UniProtKB/TrEMBL;Acc:Q9M236]
AT3G61200	1059.23	819.063	1299.41	-0.665806	0.00204784	0.0162301	down	943		AT3g61200/T20K12_100 [Source:UniProtKB/TrEMBL;Acc:Q9M2E4]
AT3G57190	91.3912	6.85449	175.928	-4.68179	2.16221e-28	2.31929e-26	down	1760	PRFB3	PrfB3 [Source:UniProtKB/TrEMBL;Acc:A0A178VAE2]
AT5G09930	5.16786	0	10.3357	#NAME?	0.000281943	0.00283638	down	2175	ABCF2	ABC transporter F family member 2 [Source:UniProtKB/Swiss-Prot;Acc:Q9FIB4]
AT1G03600	115.007	7.43947	222.575	-4.90294	2.08789e-38	3.61422e-36	down	1315	PSB27-1	Photosystem II repair protein PSB27-H1, chloroplastic [Source:UniProtKB/Swiss-Prot;Acc:Q9LR64]
AT5G51020	316.977	234.975	398.979	-0.763809	0.000338017	0.00333237	down	1161	CRL	Chromophore lyase CRL, chloroplastic [Source:UniProtKB/Swiss-Prot;Acc:Q9FI46]
AT4G04330	12.5424	1.70714	23.3776	-3.77547	8.71595e-06	0.000123005	down	726	RBCX1	Chaperonin-like RBCX protein 1, chloroplastic [Source:UniProtKB/Swiss-Prot;Acc:Q94AU9]
AT5G57850	451.609	363.605	539.613	-0.569556	0.00556281	0.0380143	down	1352	DAAT	Branched-chain amino acid aminotransferase like protein [Source:UniProtKB/TrEMBL;Acc:Q0WW83]
AT4G39970	60.6331	40.9971	80.2692	-0.969325	0.00485014	0.0339105	down	1168		Haloacid dehalogenase-like hydrolase domain-containing protein At4g39970 [Source:UniProtKB/Swiss-Prot;Acc:Q680K2]
AT2G28120	323.029	179.074	466.983	-1.38281	0.00145493	0.0120723	down	2150		At2g28120/F24D13.9 [Source:UniProtKB/TrEMBL;Acc:Q9ZUV4]
AT2G40540	1150.92	905.189	1396.66	-0.625685	0.000606254	0.00560478	down	3044	POT2	Potassium transporter [Source:UniProtKB/TrEMBL;Acc:A0A178VTZ5]
AT1G12250	156.364	24.9752	287.752	-3.52626	2.60657e-07	4.78952e-06	down	1124	TL20.3	Thylakoid lumenal protein TL20.3, chloroplastic [Source:UniProtKB/Swiss-Prot;Acc:Q8H1Q1]
AT2G03340	851.178	676.027	1026.33	-0.602341	0.00136484	0.0114382	down	2202	WRKY3	Putative WRKY DNA-binding protein [Source:UniProtKB/TrEMBL;Acc:Q0WPM8]
AT4G38160	198.576	99.9444	297.207	-1.57227	4.56083e-11	1.43635e-09	down	1742	pde191	Mitochondrial transcription termination factor family protein [Source:UniProtKB/TrEMBL;Acc:F4JSY9]
AT3G52740	452.434	0	904.869	#NAME?	1.54724e-140	1.94179e-136	down	945	BIC1	Protein BIC1 [Source:UniProtKB/Swiss-Prot;Acc:Q9LXJ1]
AT4G37800	931.173	133.64	1728.71	-3.69327	5.07419e-08	1.04911e-06	down	1288	XTH7	Probable xyloglucan endotransglucosylase/hydrolase protein 7 [Source:UniProtKB/Swiss-Prot;Acc:Q8LER3]
AT4G01080	23.4282	11.2236	35.6328	-1.66666	0.00123959	0.0105078	down	1676	TBL26	Mannan O-acetyltransferase 4 [Source:UniProtKB/TrEMBL;Acc:A0A346P851]
AT1G18670	954.071	679.942	1228.2	-0.853061	4.09975e-06	6.1619e-05	down	3167	IBS1	Protein kinase superfamily protein [Source:TAIR;Acc:AT1G18670]
AT4G18640	1586.83	1166.24	2007.42	-0.783477	7.84041e-06	0.000111751	down	2997	MDIS2	Protein MALE DISCOVERER 2 [Source:UniProtKB/Swiss-Prot;Acc:C0LGQ4]
AT5G19850	198.447	87.8096	309.084	-1.81555	8.98625e-09	2.08847e-07	down	1383		Alpha/beta-Hydrolases superfamily protein [Source:UniProtKB/TrEMBL;Acc:F4K2M9]
AT5G40950	738.248	426.535	1049.96	-1.2996	1.96004e-11	6.40585e-10	down	950	RPL27	50S ribosomal protein L27, chloroplastic [Source:UniProtKB/Swiss-Prot;Acc:Q9FLN4]
AT3G25660	711.347	514.748	907.946	-0.818741	2.14721e-05	0.000279829	down	2091	GATA	Glutamyl-tRNA(Gln) amidotransferase subunit A, chloroplastic/mitochondrial [Source:UniProtKB/Swiss-Prot;Acc:Q9LI77]
AT4G21870	26.9973	4.15132	49.8433	-3.58576	9.00461e-11	2.74624e-09	down	1032	HSP15.4	15.4 kDa class V heat shock protein [Source:UniProtKB/Swiss-Prot;Acc:O49710]
AT3G26310	9.69041	0.729865	18.6509	-4.67548	4.97285e-06	7.34659e-05	down	1660	CYP71B35	Putative cytochrome P450 [Source:UniProtKB/TrEMBL;Acc:Q0WVN2]
AT3G62960	14.8593	6.77945	22.9392	-1.75857	0.0056092	0.0382584	down	684	GRXC14	Glutaredoxin-C14 [Source:UniProtKB/Swiss-Prot;Acc:Q9LYC5]
AT4G14690	296.771	26.0556	567.487	-4.44492	2.29898e-05	0.000297292	down	909	ELIP2	Early light-induced protein 2, chloroplastic [Source:UniProtKB/Swiss-Prot;Acc:Q94K66]
AT1G16320	278.448	170.933	385.963	-1.17504	1.06706e-07	2.08268e-06	down	1174		At1g16320/F3O9_12 [Source:UniProtKB/TrEMBL;Acc:Q9SA31]
AT3G52880	6603.99	4966.9	8241.08	-0.730489	2.27577e-05	0.000294898	down	1799	ATMDAR1	Monodehydroascorbate reductase 1 [Source:UniProtKB/TrEMBL;Acc:F4J849]
AT5G58070	2644.78	623.49	4666.07	-2.90377	7.56259e-11	2.32055e-09	down	1272	TIL	TIL [Source:UniProtKB/TrEMBL;Acc:A0A178US04]
AT3G44006	6.99593	0	13.9919	#NAME?	0.000176471	0.00186896	down	705		unknown protein; Ha. [Source:TAIR;Acc:AT3G44006]
AT4G03020	2627.24	1934	3320.48	-0.779808	7.99338e-06	0.000113674	down	2051		Putative WD-repeat protein [Source:UniProtKB/TrEMBL;Acc:Q8LPI5]
AT5G52250	204.935	32.6288	377.242	-3.53127	7.11607e-11	2.18621e-09	down	1580	RUP1	WD repeat-containing protein RUP1 [Source:UniProtKB/Swiss-Prot;Acc:Q9LTJ6]
AT1G76500	433.002	348.685	517.318	-0.569129	0.00493085	0.0343981	down	1729	AHL29	AT-hook motif nuclear-localized protein 29 [Source:UniProtKB/Swiss-Prot;Acc:Q9C9K7]
AT5G54090	176.984	131.399	222.569	-0.760292	0.00144154	0.011985	down	2594		DNA mismatch repair protein MutS, type 2 [Source:UniProtKB/TrEMBL;Acc:F4JYU0]
AT5G58330	480.382	72.4702	888.294	-3.61558	2.43791e-55	8.05151e-53	down	1694		Malate dehydrogenase [NADP], chloroplastic [Source:UniProtKB/Swiss-Prot;Acc:Q8H1E2]
AT2G38230	143.539	61.0122	226.066	-1.88957	1.19321e-06	1.96006e-05	down	1283	PDX11	Pyridoxal 5'-phosphate synthase subunit PDX1.1 [Source:UniProtKB/Swiss-Prot;Acc:O80448]
AT1G24340	546.686	234.117	859.256	-1.87586	2.07135e-18	1.30959e-16	down	2479	EMB260	FAD/NAD(P)-binding oxidoreductase family protein [Source:UniProtKB/TrEMBL;Acc:Q8GYJ7]
AT1G33290	360.676	273.458	447.894	-0.71184	0.001004	0.0087306	down	1240		At1g33290 [Source:UniProtKB/TrEMBL;Acc:Q9C877]
AT4G35930	542.351	406.923	677.778	-0.736058	0.000193512	0.00202297	down	1596		FBS4 [Source:UniProtKB/TrEMBL;Acc:A0A384KMW5]
AT2G28710	179.224	120.584	237.865	-0.980111	0.00578749	0.0392823	down	677		At2g28710 [Source:UniProtKB/TrEMBL;Acc:Q9SI97]
AT2G19310	355.255	199.796	510.713	-1.35398	0.00243273	0.0188229	down	1108	HSP18.5	18.5 kDa class IV heat shock protein [Source:UniProtKB/Swiss-Prot;Acc:O64564]
AT5G35460	1699.74	1413	1986.49	-0.491464	0.00530786	0.0366109	down	2015		AT5g35460/MOK9_4 [Source:UniProtKB/TrEMBL;Acc:Q9FJB4]
AT3G62410	41.8007	17.7789	65.8226	-1.88842	0.00242741	0.0188049	down	637	CP12-2	Calvin cycle protein CP12-2, chloroplastic [Source:UniProtKB/Swiss-Prot;Acc:Q9LZP9]
AT4G37300	1473.6	881.067	2066.14	-1.22961	1.68018e-06	2.68958e-05	down	1384	MEE59	AT4g37300/C7A10_60 [Source:UniProtKB/TrEMBL;Acc:O23157]
AT4G25910	162.498	104.897	220.098	-1.06917	1.96942e-05	0.00025829	down	1148	NIFU3	NifU-like protein 3, chloroplastic [Source:UniProtKB/Swiss-Prot;Acc:Q84RQ7]
AT1G04640	162.784	124.218	201.35	-0.696831	0.00474076	0.0332383	down	1066	LIP2	LIP2 [Source:UniProtKB/TrEMBL;Acc:A0A178WI01]
AT5G56140	2644.83	2182.41	3107.26	-0.509717	0.00528702	0.0364772	down	1713		KH domain-containing protein At5g56140 [Source:UniProtKB/Swiss-Prot;Acc:Q9FKT4]
AT1G14210	1750.19	1442.81	2057.57	-0.512056	0.00288561	0.0218159	down	902		Ribonuclease T2 family protein [Source:UniProtKB/TrEMBL;Acc:F4HUG9]
AT1G80630	194.951	140.194	249.708	-0.832822	0.00115469	0.00986475	down	1972		At1g80630 [Source:UniProtKB/TrEMBL;Acc:Q9M8N0]
AT2G22650	277.876	161.178	394.573	-1.29164	4.64042e-09	1.12319e-07	down	1532		FAD-dependent oxidoreductase family protein [Source:UniProtKB/TrEMBL;Acc:Q5S4X7]
AT4G25130	1711.29	1293.92	2128.67	-0.718208	6.85618e-05	0.000795976	down	1157	MSR4	Peptide methionine sulfoxide reductase A4, chloroplastic [Source:UniProtKB/Swiss-Prot;Acc:P54150]
AT4G28750	10.9458	1.49725	20.3944	-3.76778	1.26638e-05	0.000172283	down	798	PSAE1	Photosystem I reaction center subunit IV A, chloroplastic [Source:UniProtKB/Swiss-Prot;Acc:Q9S831]
AT2G38780	260.989	156.714	365.264	-1.22081	5.33309e-08	1.09902e-06	down	2890		unknown protein; FUNCTIONS IN: molecular_function unknown; INVOLVED IN: biological_process unknown; LOCATED IN: chloroplast; EXPRESSED IN: 21 plant structures; EXPRESSED DURING: 13 growth stages; Ha. [Source:TAIR;Acc:AT2G38780]
AT1G68260	178.627	132.238	225.016	-0.766891	0.00191276	0.0153045	down	891	ALT3	Acyl-acyl carrier protein thioesterase ATL3, chloroplastic [Source:UniProtKB/Swiss-Prot;Acc:Q8W583]
AT1G01800	1581.21	1228.85	1933.56	-0.653955	0.000382519	0.00371997	down	1167		AT1G01800 protein [Source:UniProtKB/TrEMBL;Acc:Q94K30]
AT2G19150	97.6277	70.5434	124.712	-0.822017	0.00495292	0.0345041	down	1208	PME10	Putative pectinesterase 10 [Source:UniProtKB/Swiss-Prot;Acc:O64479]
AT2G44210	282.993	192.804	373.182	-0.952742	1.31944e-05	0.000179112	down	1854		AT2G44210 protein [Source:UniProtKB/TrEMBL;Acc:B9DGK6]
AT2G35660	44.2377	6.55158	81.9239	-3.64437	1.3918e-15	6.82309e-14	down	1469	CTF2A	FAD/NAD(P)-binding oxidoreductase family protein [Source:UniProtKB/TrEMBL;Acc:Q9ZQN9]
AT3G04510	5.74698	0.666414	10.8276	-4.02214	0.00434132	0.0308252	down	1326	LSH2	Protein LIGHT-DEPENDENT SHORT HYPOCOTYLS 2 [Source:UniProtKB/Swiss-Prot;Acc:Q9M836]
AT1G35140	85.9111	48.0277	123.795	-1.36601	0.000512685	0.00482323	down	1253	EXL1	Protein EXORDIUM-like 1 [Source:UniProtKB/Swiss-Prot;Acc:Q9C6E4]
AT2G43530	25.1816	8.42237	41.9409	-2.31606	5.49638e-06	8.09145e-05	down	252	ATTI3	Defensin-like protein 194 [Source:UniProtKB/Swiss-Prot;Acc:O22867]
AT5G52420	231.388	125.813	336.963	-1.42131	6.25255e-10	1.71144e-08	down	1238		Transmembrane protein [Source:UniProtKB/TrEMBL;Acc:Q9FHB8]
AT4G31850	83.6505	57.0817	110.219	-0.949276	0.00156867	0.0128882	down	3726	PGR3	Pentatricopeptide repeat-containing protein At4g31850, chloroplastic [Source:UniProtKB/Swiss-Prot;Acc:Q9SZ52]
AT5G09760	1215.51	1008.38	1422.65	-0.496542	0.00526355	0.0363353	down	2101		Pectinesterase [Source:UniProtKB/TrEMBL;Acc:A0A178UA07]
AT2G18940	356.154	279.246	433.063	-0.633041	0.00190814	0.0152773	down	2774		Pentatricopeptide repeat-containing protein At2g18940, chloroplastic [Source:UniProtKB/Swiss-Prot;Acc:O64624]
AT2G33530	453.346	347.445	559.246	-0.686698	0.000642145	0.00588753	down	1756	SCPL46	Serine carboxypeptidase-like 46 [Source:UniProtKB/Swiss-Prot;Acc:Q8VY01]
AT3G63140	74.8104	11.1176	138.503	-3.639	1.05197e-23	9.01178e-22	down	1529	CSP41A	Chloroplast stem-loop binding protein of 41 kDa a, chloroplastic [Source:UniProtKB/Swiss-Prot;Acc:Q9LYA9]
AT3G11560	1147.43	856.642	1438.22	-0.747516	5.34396e-05	0.000634239	down	2747		AT3G11560 protein [Source:UniProtKB/TrEMBL;Acc:Q8H0W4]
AT5G46580	222.927	133.39	312.463	-1.22803	7.87048e-08	1.56661e-06	down	2202		Pentatricopeptide repeat-containing protein At5g46580, chloroplastic [Source:UniProtKB/Swiss-Prot;Acc:Q9LS25]
AT1G35830	164.956	105.616	224.296	-1.08658	1.30902e-05	0.000177801	down	1837		VQ motif-containing protein [Source:UniProtKB/TrEMBL;Acc:Q9C8B9]
AT1G53090	379.656	22.6261	736.686	-5.02499	9.86401e-61	4.19638e-58	down	2807	SPA4	SPA4 [Source:UniProtKB/TrEMBL;Acc:A0A178WBA0]
AT5G36120	6.38811	0.748625	12.0276	-4.00596	0.000650407	0.00594725	down	846	CCB3	Protein COFACTOR ASSEMBLY OF COMPLEX C SUBUNIT B CCB3, chloroplastic [Source:UniProtKB/Swiss-Prot;Acc:Q8RWM7]
AT5G27290	12.2174	0.374313	24.0606	-6.00628	1.3678e-08	3.07081e-07	down	1291		At5g27290 [Source:UniProtKB/TrEMBL;Acc:Q08AA8]
AT1G03680	287.112	174.925	399.299	-1.19074	5.231e-08	1.07975e-06	down	957	ATHM1	Thioredoxin M1, chloroplastic [Source:UniProtKB/Swiss-Prot;Acc:O48737]
AT1G58400	627.227	484.997	769.456	-0.665863	0.000774503	0.00696276	down	2999		Putative disease resistance protein At1g58400 [Source:UniProtKB/Swiss-Prot;Acc:Q8W3K3]
AT3G57430	70.4719	48.2594	92.6843	-0.941516	0.00262916	0.0201564	down	2932	PCMP-H81	Pentatricopeptide repeat-containing protein At3g57430, chloroplastic [Source:UniProtKB/Swiss-Prot;Acc:Q7Y211]
AT1G13270	164.071	125.273	202.868	-0.695467	0.00373812	0.0271962	down	1418	MAP1B	Methionine aminopeptidase 1B, chloroplastic [Source:UniProtKB/Swiss-Prot;Acc:Q9FV52]
AT5G13930	37456.4	1.39628	74911.4	-15.7113	5.45638e-95	7.20816e-92	down	1703	CHS	Chalcone synthase family protein [Source:UniProtKB/TrEMBL;Acc:Q460R0]
AT2G39240	28.2323	9.62829	46.8363	-2.28228	2.84759e-06	4.37688e-05	down	2308		RNA polymerase I specific transcription initiation factor RRN3 family protein [Source:UniProtKB/TrEMBL;Acc:Q1PEV9]
AT3G03710	650.278	505.172	795.384	-0.654875	0.000682053	0.00620498	down	3317	PNP1	Polyribonucleotide nucleotidyltransferase 1, chloroplastic [Source:UniProtKB/Swiss-Prot;Acc:Q8GZQ3]
AT2G46820	258.149	93.259	423.04	-2.18148	1.70899e-20	1.24335e-18	down	1082	CURT1B	Protein CURVATURE THYLAKOID 1B, chloroplastic [Source:UniProtKB/Swiss-Prot;Acc:Q8LCA1]
AT1G16730	7.36328	1.12294	13.6036	-3.59864	0.000509239	0.00479981	down	952	UP6	F17F16.6 protein [Source:UniProtKB/TrEMBL;Acc:Q9FWQ7]
AT2G36290	4421.72	1873.78	6969.66	-1.89513	1.45354e-19	9.88724e-18	down	1877		Alpha/beta-Hydrolases superfamily protein [Source:UniProtKB/TrEMBL;Acc:Q9SJM9]
AT2G21170	3815.13	3169.27	4460.99	-0.493215	0.00478089	0.033501	down	1442	TIM	TIM [Source:UniProtKB/TrEMBL;Acc:A0A178VN28]
AT1G34000	303.865	64.9306	542.8	-3.06345	2.87084e-19	1.91135e-17	down	824	OHP2	OHP2 [Source:UniProtKB/TrEMBL;Acc:A0A178WAB5]
AT4G15530	318.332	182.174	454.489	-1.31893	5.94191e-08	1.20665e-06	down	3003	PPDK	Pyruvate, phosphate dikinase 1, chloroplastic [Source:UniProtKB/Swiss-Prot;Acc:O23404]
AT1G25275	1100.75	753.729	1447.78	-0.941725	0.000907563	0.00800135	down	583		AT1G25275 protein [Source:UniProtKB/TrEMBL;Acc:B9DG55]
AT1G64860	498.839	371.393	626.284	-0.753871	0.000116311	0.00128722	down	2178	SIGA	RNA polymerase sigma factor sigA [Source:UniProtKB/Swiss-Prot;Acc:O24629]
AT3G15520	86.2058	21.4549	150.957	-2.81475	8.20606e-18	4.93938e-16	down	1549	CYP37	Peptidyl-prolyl cis-trans isomerase CYP37, chloroplastic [Source:UniProtKB/Swiss-Prot;Acc:P82869]
AT3G27650	264.313	82.1758	446.449	-2.44171	2.60678e-23	2.15231e-21	down	999	LBD25	LOB domain-containing protein 25 [Source:UniProtKB/Swiss-Prot;Acc:Q8L8Q3]
AT4G21210	79.9185	38.5486	121.288	-1.65369	9.23219e-06	0.000129529	down	1475	RP1	Pyruvate, phosphate dikinase regulatory protein 1, chloroplastic [Source:UniProtKB/Swiss-Prot;Acc:O49562]
AT3G06430	329.79	243.767	415.813	-0.770428	0.000285128	0.00286383	down	1774	EMB2750	Pentatricopeptide repeat-containing protein At3g06430, chloroplastic [Source:UniProtKB/Swiss-Prot;Acc:Q9SQU6]
AT1G79040	1589.88	133.631	3046.13	-4.51065	2.3779e-100	3.73033e-97	down	784	PSBR	Photosystem II 10 kDa polypeptide, chloroplastic [Source:UniProtKB/Swiss-Prot;Acc:P27202]
AT3G48500	355.696	236.031	475.36	-1.01004	1.23163e-06	2.01788e-05	down	2398	PDE312	Nucleic acid-binding, OB-fold-like protein [Source:TAIR;Acc:AT3G48500]
AT3G44990	4144.39	1848.48	6440.3	-1.80079	8.13381e-06	0.000115474	down	1393	XTH31	Xyloglucan endotransglucosylase/hydrolase protein 31 [Source:UniProtKB/Swiss-Prot;Acc:P93046]
AT1G06640	8230.4	5614.1	10846.7	-0.950131	4.69528e-08	9.73175e-07	down	1655		1-aminocyclopropane-1-carboxylate oxidase homolog 2 [Source:UniProtKB/Swiss-Prot;Acc:Q9C5K7]
AT5G63450	387.373	128.875	645.872	-2.32528	9.77592e-18	5.80084e-16	down	1870	CYP94B1	cytochrome P450, family 94, subfamily B, polypeptide 1 [Source:TAIR;Acc:AT5G63450]
AT1G49660	1582.94	987.118	2178.76	-1.14221	2.40692e-10	6.9601e-09	down	1268	CXE5	Probable carboxylesterase 5 [Source:UniProtKB/Swiss-Prot;Acc:Q9FX94]
AT1G69230	352.278	69.3466	635.209	-3.19533	3.09841e-11	9.88185e-10	down	716	SP1L2	Protein SPIRAL1-like 2 [Source:UniProtKB/Swiss-Prot;Acc:Q9LE54]
AT4G30720	385.567	280.78	490.355	-0.804385	0.000300208	0.00300328	down	2570		FAD/NAD(P)-binding oxidoreductase family protein [Source:UniProtKB/TrEMBL;Acc:F4JQE2]
AT5G66610	54.1244	33.4587	74.79	-1.16046	0.000876899	0.00778294	down	1990	DAR7	DA1-related protein 7 [Source:UniProtKB/TrEMBL;Acc:F4K0N7]
AT1G62760	17.2651	7.15454	27.3757	-1.93596	0.00170022	0.0138153	down	1273	PMEI10	Pectinesterase inhibitor 10 [Source:UniProtKB/Swiss-Prot;Acc:Q9SI74]
AT2G05540	62.2856	31.1127	93.4586	-1.58683	0.000446755	0.00426371	down	824		At2g05540/T20G20.11 [Source:UniProtKB/TrEMBL;Acc:Q9SL13]
AT1G17650	159.022	122.117	195.928	-0.682061	0.0050411	0.0350115	down	1443	GLYR2	Glyoxylate/succinic semialdehyde reductase 2, chloroplastic [Source:UniProtKB/Swiss-Prot;Acc:F4I907]
AT5G51010	126.128	68.1257	184.13	-1.43445	1.30665e-07	2.51703e-06	down	886		Rubredoxin-like superfamily protein [Source:UniProtKB/TrEMBL;Acc:Q9FI47]
AT5G02280	291.328	188.586	394.07	-1.06323	7.48801e-07	1.27509e-05	down	661		SNARE-like superfamily protein [Source:UniProtKB/TrEMBL;Acc:Q9LZ97]
AT1G76020	388.172	254.233	522.112	-1.03821	6.36611e-07	1.09146e-05	down	1025		At1g76020 [Source:UniProtKB/TrEMBL;Acc:A0JQ12]
AT4G07825	1465.47	1163.4	1767.54	-0.603398	0.00463022	0.0325907	down	1592		At4g07825 [Source:UniProtKB/TrEMBL;Acc:Q8GZ72]
AT2G02130	6602.65	3819.59	9385.72	-1.29705	1.15196e-13	4.73227e-12	down	707	PDF2.3	Defensin-like protein 1 [Source:UniProtKB/Swiss-Prot;Acc:Q9ZUL7]
AT2G01530	11887.8	7553.84	16221.8	-1.10265	0.00649396	0.0432586	down	940	MLP329	Uncharacterized protein At2g01530 (Fragment) [Source:UniProtKB/TrEMBL;Acc:C0SV41]
AT2G43910	7843.21	1334	14352.4	-3.42746	1.66962e-72	1.07455e-69	down	1068	ATHOL1	HOL1 [Source:UniProtKB/TrEMBL;Acc:A0A178VXT1]
AT5G09870	2194.1	1802.88	2585.31	-0.520029	0.00750488	0.0489322	down	4138	CESA5	Cellulose synthase A catalytic subunit 5 [UDP-forming] [Source:UniProtKB/Swiss-Prot;Acc:Q8L778]
AT5G38980	64.5542	25.1806	103.928	-2.0452	0.00371326	0.0270388	down	727		At5g38980 [Source:UniProtKB/TrEMBL;Acc:Q8GXY9]
AT1G18730	10.5716	1.10418	20.039	-4.18176	5.97489e-06	8.72933e-05	down	849	PNSB4	Photosynthetic NDH subunit of subcomplex B 4, chloroplastic [Source:UniProtKB/Swiss-Prot;Acc:Q8RXS1]
AT5G12150	2295.71	1914.87	2676.54	-0.483123	0.00553954	0.0378965	down	3070	ROPGAP6	Rho GTPase-activating protein 6 [Source:UniProtKB/Swiss-Prot;Acc:Q9FMP8]
AT5G24060	529.831	370.183	689.479	-0.897266	5.93521e-06	8.67639e-05	down	1561		Pentatricopeptide repeat (PPR) superfamily protein [Source:UniProtKB/TrEMBL;Acc:F4KFP8]
ATCG01020	19.1981	9.16018	29.236	-1.6743	0.00312026	0.023323	down	159	RPL32	50S ribosomal protein L32, chloroplastic [Source:UniProtKB/Swiss-Prot;Acc:P61847]
AT3G16450	23976.6	15678.5	32274.7	-1.04162	0.005736	0.0389961	down	1293	JAL33	Jacalin-related lectin 33 [Source:UniProtKB/Swiss-Prot;Acc:O04311]
AT1G13740	123.396	75.4802	171.312	-1.18246	0.00433548	0.0308012	down	1832	AFP2	AFP2 [Source:UniProtKB/TrEMBL;Acc:A0A178WBB1]
AT3G49160	122.772	52.0648	193.479	-1.89379	2.06281e-05	0.00026981	down	2450	PKP4	Plastidial pyruvate kinase 4, chloroplastic [Source:UniProtKB/Swiss-Prot;Acc:Q9M3B6]
AT5G01410	1880.84	1395.34	2366.35	-0.762045	2.47181e-05	0.00031784	down	1538	PDX13	Pyridoxal 5'-phosphate synthase subunit PDX1.3 [Source:UniProtKB/Swiss-Prot;Acc:Q8L940]
AT4G15765	615.424	317.746	913.103	-1.5229	0.000174758	0.00185394	down	1646		FAD/NAD(P)-binding oxidoreductase family protein [Source:UniProtKB/TrEMBL;Acc:F4JK86]
AT4G16490	1754.83	1388.39	2121.27	-0.611511	0.000609794	0.00562922	down	2326		ARM repeat superfamily protein [Source:UniProtKB/TrEMBL;Acc:F4JMH0]
AT1G51630	2390.33	1951.33	2829.33	-0.536004	0.00221516	0.0173589	down	1828	MSR2	Protein MANNAN SYNTHESIS-RELATED 2 [Source:UniProtKB/Swiss-Prot;Acc:Q0WPA5]
AT3G47470	411.385	139.424	683.345	-2.29313	2.89458e-26	2.81605e-24	down	1295	LHCA4	Chlorophyll a-b binding protein, chloroplastic [Source:UniProtKB/TrEMBL;Acc:A0A178VEE6]
AT5G26010	794.758	432.859	1156.66	-1.41799	1.05473e-13	4.33994e-12	down	1474		Probable protein phosphatase 2C 72 [Source:UniProtKB/Swiss-Prot;Acc:Q9XGZ9]
AT3G53030	643.474	501.893	785.054	-0.645411	0.000933804	0.00818954	down	1998	SRPK4	Ser/arg-rich protein kinase 4 [Source:UniProtKB/TrEMBL;Acc:F4J982]
AT3G56040	324.238	235.037	413.439	-0.814784	0.000201786	0.00209898	down	3052	UGP3	UTP--glucose-1-phosphate uridylyltransferase 3, chloroplastic [Source:UniProtKB/Swiss-Prot;Acc:F4IY62]
AT4G12800	262.804	13.8308	511.776	-5.20956	5.15652e-23	4.21592e-21	down	1062	PSAL	photosystem I subunit l [Source:TAIR;Acc:AT4G12800]
AT4G23490	593.85	474.399	713.3	-0.588407	0.0049898	0.0347513	down	2129		At4g23490/F16G20_190 [Source:UniProtKB/TrEMBL;Acc:Q8H0S2]
AT2G39700	7492.48	6256.64	8728.32	-0.480317	0.00515857	0.0356891	down	1500	EXPA4	Expansin-A4 [Source:UniProtKB/Swiss-Prot;Acc:O48818]
AT1G63240	199.225	73.5977	324.851	-2.14205	6.6998e-18	4.08167e-16	down	2502		Uncharacterized protein At1g63240 [Source:UniProtKB/TrEMBL;Acc:Q949Y1]
AT2G34080	71.0387	1.66962	140.408	-6.39396	7.32772e-24	6.29883e-22	down	1369		Cysteine proteinases superfamily protein [Source:UniProtKB/TrEMBL;Acc:O22961]
AT2G28550	1340.14	433.926	2246.35	-2.37206	2.75041e-35	4.0609e-33	down	2251	RAP2.7	Related to AP2.7 [Source:UniProtKB/TrEMBL;Acc:F4IIR3]
AT2G41660	4484.03	3266.91	5701.16	-0.803328	3.22506e-06	4.92091e-05	down	1715	MIZ1	MIZ1 [Source:UniProtKB/TrEMBL;Acc:A0A178VY97]
AT2G17770	118.13	85.0586	151.201	-0.829937	0.00184395	0.0148296	down	1109	ATBZIP27	basic region/leucine zipper motif 27 [Source:TAIR;Acc:AT2G17770]
AT5G17230	891.076	453.013	1329.14	-1.55287	1.56452e-10	4.62537e-09	down	1956	PSY	PHYTOENE SYNTHASE [Source:UniProtKB/TrEMBL;Acc:F4KGX7]
AT1G59840	47.175	21.162	73.188	-1.79013	2.15459e-06	3.38001e-05	down	1376	CCB4	Protein COFACTOR ASSEMBLY OF COMPLEX C SUBUNIT B CCB4, chloroplastic [Source:UniProtKB/Swiss-Prot;Acc:Q6NQK9]
AT2G37040	25439	18416.5	32461.4	-0.817724	0.000165476	0.00176667	down	2931	PAL1	Phenylalanine ammonia-lyase 1 [Source:UniProtKB/Swiss-Prot;Acc:P35510]
AT1G54340	1651.17	1248.49	2053.84	-0.718144	7.27314e-05	0.000839337	down	1744	ICDH	Peroxisomal isocitrate dehydrogenase [NADP] [Source:UniProtKB/Swiss-Prot;Acc:Q9SLK0]
AT5G51110	124.277	22.3196	226.234	-3.34143	4.08023e-28	4.26724e-26	down	1218	ATP1	Probable pterin-4-alpha-carbinolamine dehydratase, chloroplastic [Source:UniProtKB/Swiss-Prot;Acc:Q9LU63]
AT2G29320	105.099	30.9886	179.21	-2.53184	1.16998e-09	3.09448e-08	down	1311		Tropinone reductase homolog At2g29320 [Source:UniProtKB/Swiss-Prot;Acc:Q9ZW15]
AT5G50240	47.4097	22.6305	72.189	-1.67351	1.1491e-05	0.000157523	down	872	PIMT2	Protein-L-isoaspartate O-methyltransferase 2 [Source:UniProtKB/Swiss-Prot;Acc:Q64J17]
AT2G45820	5644.98	4243.18	7046.78	-0.731818	0.00187504	0.0150538	down	932	DBP	Remorin [Source:UniProtKB/Swiss-Prot;Acc:O80837]
AT2G47460	772.882	0.292101	1545.47	-12.3693	1.28793e-88	1.61635e-85	down	1583	MYB12	Transcription factor MYB12 [Source:UniProtKB/Swiss-Prot;Acc:O22264]
AT1G28110	989.364	760.487	1218.24	-0.679804	0.000244252	0.00249826	down	1774	SCPL45	Serine carboxypeptidase-like 45 [Source:UniProtKB/Swiss-Prot;Acc:Q93Y09]
AT1G29240	102.552	46.4804	158.624	-1.77091	4.26365e-09	1.03948e-07	down	2390		F28N24.8 protein [Source:UniProtKB/TrEMBL;Acc:Q9LP52]
AT5G22020	3302.26	539.346	6065.18	-3.49127	1.92385e-14	8.51651e-13	down	1574		At5g22020 [Source:UniProtKB/TrEMBL;Acc:Q9C586]
AT5G16530	161.64	16.8204	306.46	-4.18742	2.73642e-09	6.89599e-08	down	1406	PIN5	Auxin efflux carrier component [Source:UniProtKB/TrEMBL;Acc:A0A178UIR3]
AT3G17609	506.148	38.4987	973.797	-4.66074	4.58141e-25	4.24329e-23	down	673	HYH	HYH [Source:UniProtKB/TrEMBL;Acc:A0A178VIU6]
AT4G03420	1022.23	534.179	1510.28	-1.49943	0.000345368	0.00339636	down	2040		AT4g03420/F9H3_4 [Source:UniProtKB/TrEMBL;Acc:Q8S9K9]
AT2G21530	26.0995	2.24588	49.9531	-4.47522	9.05312e-07	1.52301e-05	down	894		At2g21530 [Source:UniProtKB/TrEMBL;Acc:Q8GWP4]
AT2G23000	87.2553	6.1318	168.379	-4.77926	3.64836e-14	1.58159e-12	down	1838	SCPL10	Scpl10 [Source:UniProtKB/TrEMBL;Acc:A0A178VYK6]
AT5G24290	1684.42	1350.1	2018.74	-0.580387	0.00111226	0.00956742	down	1904	MEB2	Membrane protein of ER body 2 [Source:UniProtKB/Swiss-Prot;Acc:F4KFS7]
AT1G52220	52.1179	3.12218	101.114	-5.01728	4.4416e-25	4.12904e-23	down	840	CURT1C	CURT1C [Source:UniProtKB/TrEMBL;Acc:A0A178WBD4]
AT1G05385	73.1687	43.5379	102.8	-1.23949	8.4816e-05	0.000965917	down	742	PSB27-2	Psb27-H1 [Source:UniProtKB/TrEMBL;Acc:A0A178WJM6]
AT3G51510	53.5619	11.1147	96.0092	-3.1107	6.05217e-15	2.7976e-13	down	1204		AT3g51510/F26O13_150 [Source:UniProtKB/TrEMBL;Acc:Q9SCZ8]
AT4G01630	880.494	647.888	1113.1	-0.780767	0.00169075	0.0137428	down	1097	EXPA17	Expansin [Source:UniProtKB/TrEMBL;Acc:A0A178UWZ2]
AT1G17830	139.412	96.6872	182.137	-0.913626	0.000379523	0.00370013	down	1709		At1g17830 [Source:UniProtKB/TrEMBL;Acc:Q9LMU5]
AT5G65380	7481.56	4102.17	10861	-1.40469	0.000112693	0.00125159	down	1973	DTX27	Protein DETOXIFICATION 27 [Source:UniProtKB/Swiss-Prot;Acc:Q9FKQ1]
AT1G74850	315.949	160.236	471.662	-1.55755	7.59859e-13	2.88539e-11	down	3425	PTAC2	PTAC2 [Source:UniProtKB/TrEMBL;Acc:A0A178WNJ2]
AT2G33180	48.6161	19.887	77.3452	-1.95948	3.84937e-07	6.9261e-06	down	1117		Uncharacterized protein At2g33180 [Source:UniProtKB/TrEMBL;Acc:O49317]
AT5G48620	861.26	555.244	1167.28	-1.07195	0.000712431	0.0064626	down	3781	RPP8L4	Probable disease resistance RPP8-like protein 4 [Source:UniProtKB/Swiss-Prot;Acc:Q9FJK8]
AT1G73110	59.1695	32.92	85.4191	-1.37559	7.01879e-05	0.0008126	down	1346		At1g73110/F3N23_39 [Source:UniProtKB/TrEMBL;Acc:Q9AST9]
AT2G28690	340.507	224.289	456.726	-1.02597	1.0009e-06	1.66595e-05	down	1117		TOX high mobility group box protein, putative (DUF1635) [Source:UniProtKB/TrEMBL;Acc:Q8L8B6]
AT2G37660	429.369	104.402	754.336	-2.85306	9.77098e-39	1.73937e-36	down	1328		Uncharacterized protein At2g37660, chloroplastic [Source:UniProtKB/Swiss-Prot;Acc:O80934]
AT4G03150	36.767	17.7824	55.7515	-1.64856	0.000123523	0.00135983	down	729		AT4g03150/F4C21_7 [Source:UniProtKB/TrEMBL;Acc:Q944G6]
AT2G36210	149.211	113.711	184.712	-0.699908	0.00306014	0.022947	down	813		SAUR-like auxin-responsive protein family [Source:UniProtKB/TrEMBL;Acc:Q8L8B9]
AT1G65560	345.533	210.807	480.259	-1.18789	8.31239e-07	1.40783e-05	down	1664		Zinc-binding dehydrogenase family protein [Source:UniProtKB/TrEMBL;Acc:F4IBH8]
AT3G54260	2700.55	1782.05	3619.05	-1.02208	1.06972e-08	2.44759e-07	down	1488	TBL36	Protein trichome birefringence-like 36 [Source:UniProtKB/Swiss-Prot;Acc:Q940H3]
AT5G19500	53.4149	5.56713	101.263	-4.18502	5.37595e-21	3.98042e-19	down	1893		At5g19500 [Source:UniProtKB/TrEMBL;Acc:Q5PP33]
AT5G44400	1937.82	1157.24	2718.4	-1.23207	0.00104846	0.00909657	down	2014		Berberine bridge enzyme-like 26 [Source:UniProtKB/Swiss-Prot;Acc:Q9FKU8]
AT5G18670	1365.89	607.662	2124.13	-1.80553	0.00506968	0.0351808	down	1989	BAM9	Inactive beta-amylase 9 [Source:UniProtKB/Swiss-Prot;Acc:Q8VYW2]
AT3G56630	177.245	115.368	239.122	-1.0515	1.33453e-05	0.000181063	down	1812	CYP94D2	Cytochrome P450, family 94, subfamily D, polypeptide 2 [Source:UniProtKB/TrEMBL;Acc:Q9LXX7]
AT3G26060	193.464	18.5215	368.407	-4.31403	7.43562e-51	2.05092e-48	down	997	ATPRX Q	Thioredoxin superfamily protein [Source:UniProtKB/TrEMBL;Acc:F4JBC9]
AT1G66130	15.2361	2.4817	27.9905	-3.49554	9.06104e-07	1.52332e-05	down	1536		NAD(P)-binding Rossmann-fold superfamily protein [Source:UniProtKB/TrEMBL;Acc:Q9C8D3]
AT4G01995	111.611	66.4855	156.736	-1.23722	8.50695e-06	0.000120363	down	1112		Beta-carotene isomerase D27 [Source:UniProtKB/TrEMBL;Acc:Q8W4C4]
AT5G06270	671.014	376.067	965.96	-1.36097	2.9491e-12	1.04404e-10	down	1560		Gb [Source:UniProtKB/TrEMBL;Acc:Q9FNI1]
AT5G57350	983.309	625.796	1340.82	-1.09935	5.17566e-09	1.24553e-07	down	3208	AHA3	Plasma membrane ATPase [Source:UniProtKB/TrEMBL;Acc:A0A178UHY0]
AT5G57030	173.981	23.3112	324.65	-3.79979	2.36977e-40	4.40602e-38	down	2131	LUT2	Lycopene epsilon cyclase, chloroplastic [Source:UniProtKB/Swiss-Prot;Acc:Q38932]
AT4G15920	1319.52	1036.9	1602.13	-0.627708	0.000471378	0.00447678	down	1287	SWEET17	Nodulin MtN3 family protein [Source:TAIR;Acc:AT4G15920]
AT5G57780	53.6897	31.254	76.1254	-1.28434	0.00649588	0.0432599	down	1064		At5g57780 [Source:UniProtKB/TrEMBL;Acc:Q9FJN6]
AT5G27390	106.041	57.0909	154.992	-1.44086	2.17876e-07	4.03295e-06	down	1132		Mog1/PsbP/DUF1795-like photosystem II reaction center PsbP family protein [Source:TAIR;Acc:AT5G27390]
AT2G28900	642.591	457.661	827.521	-0.854515	1.03928e-05	0.000143882	down	964	OEP161	Outer envelope pore protein 16-1, chloroplastic [Source:UniProtKB/Swiss-Prot;Acc:Q9ZV24]
AT2G34060	248.017	115.584	380.45	-1.71876	2.24834e-08	4.8925e-07	down	1353	PER19	Peroxidase 19 [Source:UniProtKB/Swiss-Prot;Acc:O22959]
AT3G63540	181.548	34.4476	328.647	-3.25407	1.27397e-33	1.74736e-31	down	1163		Mog1/PsbP/DUF1795-like photosystem II reaction center PsbP family protein [Source:TAIR;Acc:AT3G63540]
AT5G05200	850.332	615.76	1084.9	-0.817128	1.42551e-05	0.000192264	down	1947		Uncharacterized aarF domain-containing protein kinase At5g05200, chloroplastic [Source:UniProtKB/Swiss-Prot;Acc:Q9ASX5]
AT4G12310	60.6152	12.3315	108.899	-3.14257	1.55419e-16	8.31776e-15	down	2425	CYP706A5	CYP706A5 [Source:UniProtKB/TrEMBL;Acc:A0A178UVW4]
AT5G46110	672.852	105.183	1240.52	-3.55998	2.08965e-61	9.36613e-59	down	2096	APE2	Glucose-6-phosphate/phosphate translocator-like protein [Source:UniProtKB/TrEMBL;Acc:A0A219I0W9]
AT4G25620	483.101	375.445	590.756	-0.653962	0.00122783	0.0104117	down	2077		At4g25620 [Source:UniProtKB/TrEMBL;Acc:Q8GYX5]
AT3G14110	617.046	486.239	747.853	-0.621089	0.00177363	0.0143468	down	1149	FLU	Tetratricopeptide repeat (TPR)-like superfamily protein [Source:UniProtKB/TrEMBL;Acc:F4JFR1]
AT5G51670	774.026	628.78	919.271	-0.547934	0.00344907	0.0253935	down	1745		Similarity to unknown protein [Source:UniProtKB/TrEMBL;Acc:Q9LTD7]
AT5G63310	534.325	395.189	673.46	-0.769048	9.59655e-05	0.00107773	down	980	NDPK2	NDPK2 [Source:UniProtKB/TrEMBL;Acc:A0A384KNJ7]
AT5G48880	2531.64	86.909	4976.37	-5.83944	1.0385e-21	7.89887e-20	down	1839	KAT5	PKT2 [Source:UniProtKB/TrEMBL;Acc:A0A178UEC0]
AT2G04270	150.469	88.862	212.075	-1.25494	5.45229e-07	9.49047e-06	down	3163	RNE	Ribonuclease E/G-like protein, chloroplastic [Source:UniProtKB/Swiss-Prot;Acc:F4IV66]
AT5G53860	762.463	576.959	947.967	-0.716367	0.000172169	0.00182802	down	1661	emb2737	Embryo defective 2737 [Source:UniProtKB/TrEMBL;Acc:F4JYQ8]
AT1G74470	1038.62	76.7825	2000.45	-4.70341	2.90764e-99	4.05454e-96	down	2087	CHLP	Geranylgeranyl diphosphate reductase, chloroplastic [Source:UniProtKB/Swiss-Prot;Acc:Q9CA67]
AT4G37470	1028.17	105.611	1950.74	-4.20719	4.85748e-64	2.39064e-61	down	1492	KAI2	KAI2 [Source:UniProtKB/TrEMBL;Acc:A0A178V1E5]
AT1G65060	1022.4	64.6069	1980.18	-4.9378	8.915e-08	1.76194e-06	down	2064	4CL3	4-coumarate--CoA ligase 3 [Source:UniProtKB/Swiss-Prot;Acc:Q9S777]
AT5G16960	13.6822	3.13652	24.228	-2.94944	3.7601e-05	0.000463321	down	1296		Quinone oxidoreductase-like protein [Source:UniProtKB/TrEMBL;Acc:Q9LFK5]
AT4G10040	735.7	508.004	963.396	-0.92329	0.00263789	0.020211	down	815	CYTC-2	CYTC-2 [Source:UniProtKB/TrEMBL;Acc:A0A178UZN3]
AT1G61520	342.705	33.875	651.535	-4.26555	8.85997e-63	4.19595e-60	down	1209	LHCA3	Chlorophyll a-b binding protein, chloroplastic [Source:UniProtKB/TrEMBL;Acc:A0A178W5Y6]
AT5G65160	533.31	351.268	715.351	-1.02608	7.31134e-08	1.4646e-06	down	2417	TPR14	At5g65160 [Source:UniProtKB/TrEMBL;Acc:Q9FJQ0]
AT5G02940	82.4919	41.5502	123.434	-1.57081	4.15083e-07	7.41537e-06	down	2856		Protein of unknown function (DUF1012) [Source:TAIR;Acc:AT5G02940]
AT5G42270	2036.94	655.737	3418.15	-2.38203	3.20026e-25	3.00848e-23	down	2491	FTSH5	VAR1 [Source:UniProtKB/TrEMBL;Acc:A0A178U8J6]
AT1G67030	2066.1	1355.41	2776.79	-1.03469	0.000226896	0.00233692	down	1111	ZFP6	Zinc finger protein 6 [Source:UniProtKB/Swiss-Prot;Acc:Q39265]
AT3G27160	437.831	322.367	553.295	-0.779343	0.000103835	0.00115834	down	1050	GHS1	Ribosomal protein S21 family protein [Source:UniProtKB/TrEMBL;Acc:A0A1I9LRJ3]
AT5G62200	772.286	541.633	1002.94	-0.888847	7.3054e-06	0.00010484	down	1209	ATS3B	Embryo-specific protein ATS3B [Source:UniProtKB/Swiss-Prot;Acc:Q6NPM5]
AT4G27860	4008.43	3113.31	4903.55	-0.655381	0.0040787	0.0292167	down	2153		vacuolar iron transporter (VIT) family protein [Source:TAIR;Acc:AT4G27860]
AT3G44890	447.338	305.746	588.93	-0.945764	2.558e-06	3.96577e-05	down	1216	RPL9	RPL9 [Source:UniProtKB/TrEMBL;Acc:A0A178VBQ7]
AT3G55610	4836.52	4062.03	5611.02	-0.466063	0.00699313	0.0461672	down	2376	P5CSB	Delta-1-pyrroline-5-carboxylate synthase [Source:UniProtKB/TrEMBL;Acc:A0A178VF78]
AT1G21350	165.308	116.129	214.486	-0.885158	0.000438305	0.00419103	down	1065		Thioredoxin superfamily protein [Source:TAIR;Acc:AT1G21350]
AT4G11960	305.998	183.942	428.053	-1.21854	9.69697e-08	1.90598e-06	down	1460	PGRL1B	PGR5-like protein 1B, chloroplastic [Source:UniProtKB/Swiss-Prot;Acc:Q8GYC7]
AT3G46970	871.541	716.027	1027.05	-0.520428	0.00382998	0.0277358	down	3168	PHS2	Alpha-glucan phosphorylase 2, cytosolic [Source:UniProtKB/Swiss-Prot;Acc:Q9SD76]
AT4G27030	163.192	17.628	308.757	-4.13053	2.66927e-17	1.51581e-15	down	1258	FAD4	FADA [Source:UniProtKB/TrEMBL;Acc:A0A178UUY9]
AT3G54050	109.424	11.5294	207.319	-4.16846	1.31219e-35	1.97222e-33	down	1500	CFBP1	Fructose-1,6-bisphosphatase 1, chloroplastic [Source:UniProtKB/Swiss-Prot;Acc:P25851]
AT5G59760	41.7007	25.5404	57.8609	-1.17981	0.00191569	0.015319	down	973		Putative uncharacterized protein [Source:UniProtKB/TrEMBL;Acc:Q58FT1]
AT3G19810	174.295	123.9	224.689	-0.858749	0.000424353	0.00407782	down	1460		Large ribosomal RNA subunit accumulation protein YCED homolog 1, chloroplastic [Source:UniProtKB/Swiss-Prot;Acc:Q9LT27]
AT2G18500	268.009	147.907	388.111	-1.39178	4.09917e-10	1.14194e-08	down	1317	OFP7	Transcription repressor OFP7 [Source:UniProtKB/Swiss-Prot;Acc:Q9ZU65]
AT1G76100	42.1088	9.05204	75.1656	-3.05376	3.43821e-12	1.21036e-10	down	936	PETE1	plastocyanin 1 [Source:TAIR;Acc:AT1G76100]
AT3G61750	276.133	171.243	381.022	-1.15383	1.06186e-05	0.000146685	down	1970		Cytochrome b561 and DOMON domain-containing protein At3g61750 [Source:UniProtKB/Swiss-Prot;Acc:Q9M363]
AT5G38660	378.9	302.136	455.663	-0.592768	0.00551598	0.0377869	down	1892	APE1	Acclimation of photosynthesis to environment [Source:UniProtKB/TrEMBL;Acc:A0A219HZL6]
AT1G14530	298.526	232.747	364.305	-0.646382	0.00237253	0.0184367	down	1489	THH1	Protein TOM THREE HOMOLOG 1 [Source:UniProtKB/Swiss-Prot;Acc:Q948R8]
AT1G13080	1225.31	559.38	1891.25	-1.75744	0.00394464	0.0284527	down	1761	CYP71B2	Cytochrome P450 71B2 [Source:UniProtKB/Swiss-Prot;Acc:O65788]
AT3G24420	890.552	689.589	1091.52	-0.662522	0.000332198	0.00328275	down	1476		Alpha/beta-Hydrolases superfamily protein [Source:UniProtKB/TrEMBL;Acc:Q9LK01]
AT1G54890	226.485	150.588	302.383	-1.00577	0.00117303	0.00999426	down	1501		Late embryogenesis abundant (LEA) protein-like protein [Source:UniProtKB/TrEMBL;Acc:Q9FZ41]
AT4G28490	294.655	199.314	389.996	-0.968421	8.76217e-06	0.000123487	down	3710	RLK5	Receptor-like protein kinase 5 [Source:UniProtKB/Swiss-Prot;Acc:P47735]
AT4G21320	102.271	50.2806	154.262	-1.61731	8.36971e-07	1.41659e-05	down	1334	HSA32	HSA32 [Source:UniProtKB/TrEMBL;Acc:A0A178UV51]
AT4G21323	20.8498	9.93473	31.765	-1.67688	0.00170858	0.0138653	down	3029		Subtilase family protein [Source:TAIR;Acc:AT4G21323]
AT3G13790	6886.49	5586.22	8186.77	-0.551423	0.007033	0.0463938	down	2112	CWINV1	Beta-fructofuranosidase, insoluble isoenzyme CWINV1 [Source:UniProtKB/Swiss-Prot;Acc:Q43866]
AT3G61250	24.7381	5.60388	43.8723	-2.96881	4.6881e-08	9.72489e-07	down	1677	AtMYB17	Transcription factor MYB41 [Source:UniProtKB/Swiss-Prot;Acc:Q9M2D9]
AT3G02730	110.732	44.2303	177.234	-2.00255	1.43215e-10	4.25409e-09	down	943	TRXF1	TRXF1 [Source:UniProtKB/TrEMBL;Acc:A0A178VBJ7]
AT5G02250	613.944	480.623	747.265	-0.636714	0.00110844	0.00954441	down	3086	RNR1	Ribonuclease II, chloroplastic/mitochondrial [Source:UniProtKB/Swiss-Prot;Acc:Q6NQJ6]
AT5G26820	981.588	404.088	1559.09	-1.94796	4.0866e-09	9.9877e-08	down	2239	IREG3	Solute carrier family 40 member 3, chloroplastic [Source:UniProtKB/Swiss-Prot;Acc:Q8W4E7]
AT5G24460	648.539	465.188	831.89	-0.838579	9.92825e-06	0.000138269	down	1289		RING-H2 zinc finger protein [Source:UniProtKB/TrEMBL;Acc:Q9FGE4]
AT3G09600	174.172	112.873	235.47	-1.06084	1.71082e-05	0.000227566	down	1820	RVE8	Protein REVEILLE 8 [Source:UniProtKB/Swiss-Prot;Acc:Q8RWU3]
AT5G58760	554.197	165.682	942.712	-2.5084	5.43371e-14	2.30772e-12	down	2187	DDB2	Protein DAMAGED DNA-BINDING 2 [Source:UniProtKB/Swiss-Prot;Acc:Q6NQ88]
AT2G05430	9.33885	1.33283	17.3449	-3.70195	0.00026625	0.00270124	down	1435		Ubiquitin-specific protease family C19-related protein [Source:UniProtKB/TrEMBL;Acc:Q8S898]
AT2G46535	1223.87	857.354	1590.39	-0.891422	1.34544e-06	2.19351e-05	down	890		Uncharacterized protein At2g46535 [Source:UniProtKB/TrEMBL;Acc:Q84JE7]
AT5G48300	1172.65	851.604	1493.7	-0.810639	0.000543944	0.00508113	down	1898	APS1	Glucose-1-phosphate adenylyltransferase small subunit, chloroplastic [Source:UniProtKB/Swiss-Prot;Acc:P55228]
AT3G09070	1282.75	1015.88	1549.61	-0.609175	0.000878488	0.00779154	down	2735	OPS	UPF0503 protein At3g09070, chloroplastic [Source:UniProtKB/Swiss-Prot;Acc:Q9SS80]
AT5G45680	10.4091	0.374313	20.4438	-5.77128	3.03999e-07	5.54711e-06	down	896	FKBP13	Peptidyl-prolyl cis-trans isomerase FKBP13, chloroplastic [Source:UniProtKB/Swiss-Prot;Acc:Q9SCY2]
AT2G38380	11480.9	8157.14	14804.6	-0.859908	0.000653302	0.00597156	down	1671	PER22	Peroxidase 22 [Source:UniProtKB/Swiss-Prot;Acc:P24102]
AT1G22850	306.811	233.43	380.193	-0.703743	0.00106057	0.00919848	down	1123		At1g22850/F29G20_19 [Source:UniProtKB/TrEMBL;Acc:O23137]
AT4G03210	1709.96	1122.67	2297.26	-1.03299	0.00552366	0.0378188	down	1310	XTH9	Xyloglucan endotransglucosylase/hydrolase (Fragment) [Source:UniProtKB/TrEMBL;Acc:C0SVH2]
AT2G18710	721.167	489.859	952.475	-0.959316	0.00179062	0.0144702	down	1836	SCY1	SCY1 [Source:UniProtKB/TrEMBL;Acc:A0A178VZD7]
AT3G53460	2408.71	1479.2	3338.22	-1.17426	1.02584e-06	1.70294e-05	down	1533	CP29	Chloroplast RNA-binding protein 29 [Source:UniProtKB/TrEMBL;Acc:F4JAF3]
AT1G76730	171.48	46.7754	296.185	-2.66268	5.00196e-19	3.26102e-17	down	1500	COG0212	COG0212 [Source:UniProtKB/TrEMBL;Acc:A0A178WEK7]
AT2G22920	1717.53	1231.9	2203.16	-0.838691	2.36529e-05	0.000305081	down	1425	SCPL12	Serine carboxypeptidase-like 12 [Source:UniProtKB/Swiss-Prot;Acc:O81009]
AT4G34720	3973.51	3246.39	4700.63	-0.53402	0.00187647	0.0150573	down	1227	VHA-c3	V-type proton ATPase subunit c1 [Source:UniProtKB/Swiss-Prot;Acc:P0DH92]
AT3G52150	417.745	217.335	618.156	-1.50805	5.43437e-13	2.08567e-11	down	1131	PSRP2	PSRP2 [Source:UniProtKB/TrEMBL;Acc:A0A178VFQ5]
AT5G23120	264.364	40.4828	488.246	-3.59222	9.08308e-39	1.62847e-36	down	1668	HCF136	photosystem II stability/assembly factor, chloroplast (HCF136) [Source:TAIR;Acc:AT5G23120]
AT4G35450	2535.49	1961.96	3109.02	-0.664166	0.000156581	0.00168316	down	1530	AKR2	Ankyrin repeat-containing protein 2 [Source:UniProtKB/TrEMBL;Acc:F4JN13]
AT4G18630	741.358	614.028	868.687	-0.500532	0.00557014	0.0380333	down	2064		Uncharacterized protein At4g18630/F28A21_40 [Source:UniProtKB/TrEMBL;Acc:Q8GYP4]
AT3G23290	213.572	52.6847	374.46	-2.82936	2.18132e-05	0.000283979	down	1465	LSH4	LSH4 [Source:UniProtKB/TrEMBL;Acc:A0A178VHD2]
AT5G46450	163.005	89.5423	236.469	-1.40101	2.05573e-08	4.50251e-07	down	3555		Disease resistance protein (TIR-NBS-LRR class) family [Source:UniProtKB/TrEMBL;Acc:Q9FHG0]
AT5G05170	17183.4	12902.4	21464.4	-0.734306	1.914e-05	0.000251921	down	3825	CESA3	Cellulose synthase A catalytic subunit 3 [UDP-forming] [Source:UniProtKB/Swiss-Prot;Acc:Q941L0]
AT4G33470	111.083	64.9681	157.199	-1.27479	3.53243e-06	5.36058e-05	down	1562	HDA14	Histone deacetylase [Source:UniProtKB/TrEMBL;Acc:A0A178V1U6]
AT2G24790	2245.15	1505.67	2984.63	-0.987151	6.06648e-08	1.22896e-06	down	966	COL3	Zinc finger protein CONSTANS-LIKE 3 [Source:UniProtKB/Swiss-Prot;Acc:Q9SK53]
AT1G26180	263.221	198.36	328.081	-0.725934	0.00111379	0.00957727	down	1482		Membrane protein [Source:UniProtKB/TrEMBL;Acc:Q8VYA7]
AT5G65640	1867.26	1175.4	2559.13	-1.1225	9.17364e-10	2.46003e-08	down	1426	BHLH93	Transcription factor bHLH93 [Source:UniProtKB/Swiss-Prot;Acc:Q9LSL1]
AT2G39670	683.237	499.868	866.607	-0.793832	4.29683e-05	0.000522525	down	1722		Radical SAM superfamily protein [Source:UniProtKB/TrEMBL;Acc:F4IVY6]
AT1G01170	10.4716	1.46051	19.4826	-3.73765	5.40554e-05	0.000641205	down	509		At1g01170 [Source:UniProtKB/TrEMBL;Acc:Q2HIQ2]
AT2G08650	6.82741	0	13.6548	#NAME?	9.80464e-06	0.00013672	down	937
AT1G47980	4.17655	0	8.3531	#NAME?	0.00089567	0.00792432	down	1191		unknown protein; FUNCTIONS IN: molecular_function unknown; INVOLVED IN: biological_process unknown; LOCATED IN: endomembrane system; EXPRESSED IN: 6 plant structures; EXPRESSED DURING: 4 anthesis, F mature embryo stage, petal differentiation and exp /.../ stage, E expanded cotyledon stage; BEST Arabidopsis thaliana protein match is: unknown protein (TAIR:AT3G62730.1); Ha. [Source:TAIR;Acc:AT1G479…
AT1G48450	798.775	601.966	995.584	-0.725862	0.00114338	0.00977812	down	1495		Alanine-tRNA ligase, putative (DUF760) [Source:UniProtKB/TrEMBL;Acc:Q9LP80]
AT4G01540	621.219	462.705	779.733	-0.752889	0.000116201	0.00128656	down	1591	NAC68	NAC domain-containing protein 68 [Source:UniProtKB/Swiss-Prot;Acc:A8MQY1]
AT5G42765	188.126	144.493	231.758	-0.681618	0.00413307	0.0295556	down	997		INVOLVED IN: biological_process unknown; LOCATED IN: thylakoid, chloroplast thylakoid membrane, chloroplast; EXPRESSED IN: 22 plant structures; EXPRESSED DURING: 13 growth stages; CONTAINS InterPro DOMAIN/s: Twin-arginine translocation pathway, sign /.../uence (InterPro:IPR006311); Ha. [Source:TAIR;Acc:AT5G42765]
AT1G48840	607.947	443.757	772.137	-0.799087	5.09357e-05	0.000607068	down	2638		Heat-inducible transcription repressor (DUF639) [Source:UniProtKB/TrEMBL;Acc:Q8VXZ2]
AT3G46650	126.505	94.8512	158.158	-0.737628	0.00514717	0.0356201	down	1425		UDP-Glycosyltransferase superfamily protein [Source:UniProtKB/TrEMBL;Acc:F4J962]
AT4G19060	287.291	228.535	346.046	-0.598549	0.00708201	0.0466691	down	1385		Probable disease resistance protein At4g19060 [Source:UniProtKB/Swiss-Prot;Acc:Q84WD3]
AT4G37550	622.182	443.497	800.867	-0.852637	1.25344e-05	0.000170614	down	1761		Acetamidase/Formamidase family protein [Source:TAIR;Acc:AT4G37550]
AT3G14350	2633.09	1976.18	3290.01	-0.735379	2.3039e-05	0.000297775	down	2721	SRF7	Protein STRUBBELIG-RECEPTOR FAMILY 7 [Source:UniProtKB/Swiss-Prot;Acc:Q9LUL4]
AT1G21600	544.911	331.524	758.299	-1.19366	3.51969e-09	8.72966e-08	down	1447	PTAC6	AT1G21600 protein [Source:UniProtKB/TrEMBL;Acc:Q9XI19]
AT3G19040	63.9207	42.1308	85.7106	-1.0246	0.00190618	0.0152664	down	5505	TAF1	Histone acetyltransferase of the TAFII250 family 2 [Source:UniProtKB/TrEMBL;Acc:A0A1I9LSR7]
AT1G13670	864.015	95.853	1632.18	-4.08983	1.19592e-73	8.11286e-71	down	1248		At1g13670 [Source:UniProtKB/TrEMBL;Acc:Q9LMY0]
AT3G55030	535.243	408.618	661.868	-0.695793	0.000454298	0.0043324	down	1394	PGPS2	PGPS2 [Source:UniProtKB/TrEMBL;Acc:A0A178VAK6]
AT5G62890	4104.33	3193.41	5015.25	-0.651223	0.000201146	0.00209492	down	2113	NAT6	Nucleobase-ascorbate transporter 6 [Source:UniProtKB/Swiss-Prot;Acc:Q27GI3]
AT1G75690	58.1585	10.3661	105.951	-3.35345	3.26444e-17	1.84129e-15	down	1358	LQY1	LQY1 [Source:UniProtKB/TrEMBL;Acc:A0A178W9N8]
AT2G28320	1630.5	1299.02	1961.99	-0.594897	0.000738692	0.00667669	down	2974		Pleckstrin homology (PH) and lipid-binding START domains-containing protein [Source:UniProtKB/TrEMBL;Acc:F4IHT0]
AT2G29630	471.604	73.1503	870.058	-3.57218	2.09105e-56	7.09261e-54	down	2979	THIC	Phosphomethylpyrimidine synthase, chloroplastic [Source:UniProtKB/Swiss-Prot;Acc:O82392]
AT4G32260	860.633	464.122	1257.14	-1.43757	6.23489e-14	2.62577e-12	down	1117		PDE334 [Source:UniProtKB/TrEMBL;Acc:A0A178V017]
AT2G29980	4362.76	2908.28	5817.25	-1.00017	1.10468e-08	2.51839e-07	down	1597	FAD3	FAD3 [Source:UniProtKB/TrEMBL;Acc:A0A178VX43]
AT5G54960	2067.19	609.159	3525.22	-2.53282	2.30524e-34	3.21453e-32	down	2280	PDC2	Pyruvate decarboxylase 2 [Source:UniProtKB/Swiss-Prot;Acc:Q9FFT4]
AT4G23500	860.936	583.897	1137.98	-0.962684	3.25263e-07	5.91602e-06	down	1877		Pectin lyase-like superfamily protein [Source:UniProtKB/TrEMBL;Acc:O81746]
AT5G39080	26.4865	11.3945	41.5786	-1.86751	0.00153075	0.0126263	down	1775		Acyltransferase-like protein [Source:UniProtKB/TrEMBL;Acc:Q9FID2]
AT2G01610	649.454	390.184	908.723	-1.21969	0.000169305	0.00180066	down	1108		At2g01610 [Source:UniProtKB/TrEMBL;Acc:Q9ZNU5]
AT5G44390	309.826	210.057	409.596	-0.963419	4.11454e-06	6.18043e-05	down	1985		Berberine bridge enzyme-like 25 [Source:UniProtKB/Swiss-Prot;Acc:Q9FKU9]
AT3G21200	578.727	458.088	699.365	-0.610423	0.001835	0.0147718	down	1185	GLUTRBP	Glutamyl-tRNA reductase-binding protein, chloroplastic [Source:UniProtKB/Swiss-Prot;Acc:Q9LU39]
AT3G16000	257.606	127.834	387.377	-1.59947	1.37026e-12	5.0728e-11	down	2702	MFP1	MAR-binding filament-like protein 1 [Source:UniProtKB/Swiss-Prot;Acc:Q9LW85]
AT4G15480	536.441	2.17083	1070.71	-8.9461	1.81469e-09	4.70059e-08	down	1716	UGT84A1	UDP-glycosyltransferase 84A1 [Source:UniProtKB/Swiss-Prot;Acc:Q5XF20]
AT3G63170	572.38	464.499	680.26	-0.550412	0.00553593	0.0378822	down	1029	FAP1	Fatty-acid-binding protein 1 [Source:UniProtKB/Swiss-Prot;Acc:Q9M1X2]
AT2G01110	332.94	236.363	429.517	-0.861708	5.00918e-05	0.000598431	down	1719	TATC	UNE3 [Source:UniProtKB/TrEMBL;Acc:A0A178VUB7]
AT5G43260	276.298	216.923	335.674	-0.629881	0.00466214	0.0327786	down	964		Chaperone protein dnaJ-like protein [Source:UniProtKB/TrEMBL;Acc:Q94CB5]
AT1G20450	6420.58	4467.07	8374.09	-0.906604	1.62963e-07	3.07547e-06	down	1562	ERD10	Dehydrin ERD10 [Source:UniProtKB/Swiss-Prot;Acc:P42759]
AT3G48690	995.145	203.401	1786.89	-3.13505	2.04675e-10	5.98759e-09	down	1189	CXE12	Probable carboxylesterase 12 [Source:UniProtKB/Swiss-Prot;Acc:Q9SMN0]
AT4G15810	179.449	120.415	238.483	-0.985877	3.82221e-05	0.000469361	down	2922		P-loop containing nucleoside triphosphate hydrolases superfamily protein [Source:UniProtKB/TrEMBL;Acc:F4JKW7]
AT4G24240	1484.73	999.078	1970.39	-0.97981	8.76554e-08	1.73514e-06	down	1864	WRKY7	Probable WRKY transcription factor 7 [Source:UniProtKB/Swiss-Prot;Acc:Q9STX0]
AT2G24820	184.04	49.368	318.711	-2.6906	1.51217e-19	1.02582e-17	down	1825	TIC55	Protein TIC 55, chloroplastic [Source:UniProtKB/Swiss-Prot;Acc:Q9SK50]
AT4G22160	329.685	253.271	406.1	-0.681154	0.00160081	0.0131223	down	852		Uncharacterized protein At4g22160 [Source:UniProtKB/Swiss-Prot;Acc:Q8L8L9]
AT2G36870	213.991	24.6131	403.368	-4.0346	6.8751e-10	1.87164e-08	down	1268	XTH32	Probable xyloglucan endotransglucosylase/hydrolase protein 32 [Source:UniProtKB/Swiss-Prot;Acc:Q9SJL9]
AT1G02300	266.552	151.697	381.408	-1.33015	8.52831e-06	0.000120593	down	1464	CATHB1	Cathepsin B-like protease 1 [Source:UniProtKB/Swiss-Prot;Acc:F4HVZ1]
AT3G27925	398.555	281.246	515.864	-0.875155	2.79081e-05	0.000354143	down	1623	DEGP1	DEGP1 [Source:UniProtKB/TrEMBL;Acc:A0A178V823]
AT1G06680	589.921	28.4413	1151.4	-5.33926	1.32042e-102	2.2095e-99	down	1210	PSBP1	Oxygen-evolving enhancer protein 2-1, chloroplastic [Source:UniProtKB/Swiss-Prot;Acc:Q42029]
AT2G32550	13.3198	4.66412	21.9754	-2.23621	0.00227314	0.0177633	down	1204		Cell differentiation, Rcd1-like protein [Source:UniProtKB/TrEMBL;Acc:Q58FZ9]
AT5G57800	470.342	349.157	591.527	-0.76057	0.000119103	0.00131464	down	2589	CER3	Protein ECERIFERUM 3 [Source:UniProtKB/Swiss-Prot;Acc:Q8H1Z0]
AT1G74370	76.0605	46.5965	105.524	-1.17928	0.000237381	0.00243791	down	1159		At1g74370 [Source:UniProtKB/TrEMBL;Acc:Q9CA76]
AT1G47128	16740.5	10226.7	23254.4	-1.18516	2.68748e-05	0.000342242	down	1919	RD21A	RD21A [Source:UniProtKB/TrEMBL;Acc:A0A178WIH7]
AT1G33670	12.9889	2.939	23.0388	-2.97067	0.000489551	0.00462815	down	1446		Leucine-rich repeat (LRR) family protein [Source:UniProtKB/TrEMBL;Acc:Q4PT10]
AT2G18790	2579.91	1942.38	3217.45	-0.728096	2.57389e-05	0.000329447	down	4321	PHYB	Phytochrome [Source:UniProtKB/TrEMBL;Acc:A0A178W0V4]
AT2G40530	124.95	89.5538	160.346	-0.840366	0.00261105	0.0200481	down	780	CEP15	Precursor of CEP15 [Source:UniProtKB/Swiss-Prot;Acc:O22882]
AT2G02950	86.9684	17.1895	156.747	-3.18884	5.48045e-09	1.31009e-07	down	2649	PKS1	Protein PHYTOCHROME KINASE SUBSTRATE 1 [Source:UniProtKB/Swiss-Prot;Acc:Q9SWI1]
AT2G35840	817.211	659.91	974.513	-0.562411	0.00237714	0.0184668	down	2018	SPP2	Probable sucrose-phosphatase 2 [Source:UniProtKB/Swiss-Prot;Acc:Q9SJ66]
AT2G03390	586.688	441.683	731.693	-0.728227	0.000223798	0.00230786	down	1404	CLPF	Clp protease adapter protein ClpF, chloroplastic [Source:UniProtKB/Swiss-Prot;Acc:Q67Y99]
AT1G45191	35.993	4.06194	67.924	-4.06368	0.000197518	0.00205884	down	1766	BGLU1	Glycosyl hydrolase superfamily protein [Source:TAIR;Acc:AT1G45191]
AT1G65260	860.844	699.35	1022.34	-0.547786	0.0043192	0.0307116	down	1611	VIPP1	Membrane-associated protein VIPP1, chloroplastic [Source:UniProtKB/Swiss-Prot;Acc:O80796]
AT1G01610	2260	1872.34	2647.66	-0.499874	0.00442057	0.0313082	down	1916	GPAT4	GPAT4 [Source:UniProtKB/TrEMBL;Acc:A0A178W9F8]
AT1G15500	6803.41	3637.56	9969.25	-1.45451	1.40881e-16	7.55579e-15	down	2180	AATP2	ADP,ATP carrier protein [Source:UniProtKB/TrEMBL;Acc:A0A178WDN7]
AT5G04000	96.6363	16.3203	176.952	-3.43862	4.25914e-12	1.49099e-10	down	776		unknown protein; Ha. [Source:TAIR;Acc:AT5G04000]
AT1G19330	532.022	368.234	695.809	-0.918067	3.81601e-06	5.75958e-05	down	1354		unknown protein; BEST Arabidopsis thaliana protein match is: unknown protein (TAIR:AT1G75060.1); Ha. [Source:TAIR;Acc:AT1G19330]
AT5G01780	374.816	300.722	448.911	-0.578001	0.00630979	0.042256	down	1758		2-oxoglutarate-dependent dioxygenase family protein [Source:UniProtKB/TrEMBL;Acc:F4KAV2]
AT5G09230	338.419	182.577	494.26	-1.43676	2.16648e-11	7.04387e-10	down	1406	SRT2	sirtuin 2 [Source:TAIR;Acc:AT5G09230]
AT4G00030	990.381	771.78	1208.98	-0.647531	0.000765227	0.00688924	down	724	PAP11	Probable plastid-lipid-associated protein 11, chloroplastic [Source:UniProtKB/Swiss-Prot;Acc:O81304]
AT1G50290	79.5817	37.812	121.351	-1.68228	5.86001e-08	1.1968e-06	down	902		At1g50290/F14I3_12 [Source:UniProtKB/TrEMBL;Acc:Q944R3]
AT3G62930	187.287	84.2588	290.315	-1.78472	4.05354e-08	8.5022e-07	down	486	GRXS6	Monothiol glutaredoxin-S6 [Source:UniProtKB/Swiss-Prot;Acc:Q9LYC8]
AT3G17930	212.8	126.075	299.524	-1.24839	7.40302e-08	1.47942e-06	down	819		AT3g17930/MEB5_15 [Source:UniProtKB/TrEMBL;Acc:Q94BY7]
AT5G06130	724.998	565.808	884.188	-0.64404	0.000957222	0.00837152	down	1539	ORLIKE	Protein ORANGE-LIKE, chloroplastic [Source:UniProtKB/Swiss-Prot;Acc:Q8VYD8]
AT1G53670	581.357	324.849	837.866	-1.36695	2.21018e-07	4.08509e-06	down	815	MSRB1	Peptide methionine sulfoxide reductase B1, chloroplastic [Source:UniProtKB/Swiss-Prot;Acc:Q9C8M2]
AT4G13590	838.993	668.83	1009.16	-0.593439	0.00162365	0.0132766	down	1457	PAM71-HL	Protein PAM71-homolog, chloroplastic [Source:UniProtKB/Swiss-Prot;Acc:Q9T0H9]
AT1G52100	142.29	3.61258	280.968	-6.28123	5.25197e-08	1.08319e-06	down	1832		Mannose-binding lectin superfamily protein [Source:TAIR;Acc:AT1G52100]
AT2G40080	3014.38	692.763	5335.99	-2.94532	6.21237e-54	1.91139e-51	down	660	ELF4	Protein EARLY FLOWERING 4 [Source:UniProtKB/Swiss-Prot;Acc:O04211]
AT2G37200	591.823	469.061	714.584	-0.607328	0.00344988	0.0253935	down	900		Uncharacterised protein family (UPF0497) [Source:TAIR;Acc:AT2G37200]
AT1G54500	247.411	50.3118	444.511	-3.14325	3.17777e-36	5.01648e-34	down	926		At1g54500/F20D21_31 [Source:UniProtKB/TrEMBL;Acc:Q9SLI4]
AT5G16715	629.01	474.099	783.922	-0.725522	0.000206851	0.00214632	down	3394	EMB2247	Valine--tRNA ligase, chloroplastic/mitochondrial 2 [Source:UniProtKB/Swiss-Prot;Acc:F4KE63]
AT2G37970	47.6708	12.7165	82.6252	-2.69988	0.00200447	0.0159317	down	836	SOUL-1	SOUL heme-binding family protein [Source:TAIR;Acc:AT2G37970]
AT5G63860	1644.93	1376.37	1913.48	-0.47533	0.00764161	0.0496201	down	2209	UVR8	Ultraviolet-B receptor UVR8 [Source:UniProtKB/Swiss-Prot;Acc:Q9FN03]
AT4G09010	59.367	13.1219	105.612	-3.00872	6.38674e-15	2.94682e-13	down	1300	APX4	ascorbate peroxidase 4 [Source:TAIR;Acc:AT4G09010]
AT5G30510	956.839	609.013	1304.66	-1.09913	5.36284e-09	1.28442e-07	down	1588	RPS1	30S ribosomal protein S1, chloroplastic [Source:UniProtKB/Swiss-Prot;Acc:Q93VC7]
AT1G26761	8.81053	0.292101	17.329	-5.89057	3.37837e-06	5.14546e-05	down	1619		Arabinanase/levansucrase/invertase [Source:UniProtKB/TrEMBL;Acc:Q93ZE3]
AT2G41475	2213.46	1771.3	2655.63	-0.584246	0.00683368	0.0452573	down	1057	ATS3A	Embryo-specific protein ATS3A [Source:UniProtKB/Swiss-Prot;Acc:Q681K2]
AT3G23805	210.056	104.774	315.339	-1.58962	3.7797e-07	6.80563e-06	down	913	RALFL24	Protein RALF-like 24 [Source:UniProtKB/Swiss-Prot;Acc:Q9LK37]
AT5G19100	112.163	73.4965	150.83	-1.03718	0.000157688	0.00169433	down	1660		Eukaryotic aspartyl protease family protein [Source:UniProtKB/TrEMBL;Acc:Q3E9C8]
AT1G05140	275.244	153.037	397.451	-1.3769	5.66051e-10	1.55447e-08	down	1514	ARASP2	Probable membrane metalloprotease ARASP2, chloroplastic [Source:UniProtKB/Swiss-Prot;Acc:O23053]
AT3G16420	61765.2	44898.8	78631.6	-0.808433	5.06345e-05	0.000604052	down	1299	PBP1	PYK10-binding protein 1 [Source:UniProtKB/Swiss-Prot;Acc:O04314]
AT2G34860	228.426	109.003	347.849	-1.67409	2.37032e-09	6.02785e-08	down	947	PSA2	Protein PHOTOSYSTEM I ASSEMBLY 2, chloroplastic [Source:UniProtKB/Swiss-Prot;Acc:O64750]
AT2G22590	729.365	6.27746	1452.45	-7.85409	7.38251e-08	1.47768e-06	down	1624	UGT91A1	UDP-glycosyltransferase 91A1 [Source:UniProtKB/Swiss-Prot;Acc:Q940V3]
AT1G03590	840.965	685.096	996.834	-0.541049	0.00403903	0.0289904	down	2219	PPC6-6	Probable protein phosphatase 2C 1 [Source:UniProtKB/Swiss-Prot;Acc:Q9LR65]
AT3G51750	50.7737	19.4197	82.1278	-2.08035	5.14127e-05	0.000612357	down	592		Uncharacterized protein At3g51750 [Source:UniProtKB/TrEMBL;Acc:Q9SCT3]
AT5G05940	235.278	170.99	299.565	-0.808957	0.000923614	0.00811435	down	2298	ROPGEF5	Rop guanine nucleotide exchange factor 5 [Source:UniProtKB/Swiss-Prot;Acc:F4K295]
AT3G10060	112.996	70.1592	155.833	-1.15129	4.69663e-05	0.000566484	down	1123	FKBP16-4	Peptidylprolyl isomerase [Source:UniProtKB/TrEMBL;Acc:A0A178V516]
AT4G28250	5585.33	4030.86	7139.79	-0.824792	0.000719133	0.00650928	down	1368	EXPB3	EXPB3 [Source:UniProtKB/TrEMBL;Acc:A0A178USU9]
AT3G56010	149.792	65.3455	234.238	-1.84182	2.1123e-10	6.16496e-09	down	1119		Transmembrane protein [Source:UniProtKB/TrEMBL;Acc:Q9LY44]
AT2G39730	995.301	124.584	1866.02	-3.90477	4.09531e-77	3.42641e-74	down	1964	RCA	Ribulose bisphosphate carboxylase/oxygenase activase, chloroplastic [Source:UniProtKB/Swiss-Prot;Acc:P10896]
AT1G69160	262.483	188.899	336.067	-0.831136	0.000121587	0.00133911	down	1778		Protein BIG GRAIN 1-like E [Source:UniProtKB/Swiss-Prot;Acc:Q93Z37]
AT1G06190	536.462	392.808	680.115	-0.791954	6.01168e-05	0.000708752	down	1641		Rho termination factor [Source:TAIR;Acc:AT1G06190]
AT5G44574	40.8492	5.32689	76.3714	-3.84167	4.97979e-12	1.72642e-10	down	1022		unknown protein; FUNCTIONS IN: molecular_function unknown; INVOLVED IN: biological_process unknown; LOCATED IN: endomembrane system; Ha. [Source:TAIR;Acc:AT5G44574]
AT5G44572	30.6862	11.4076	49.9649	-2.13092	1.00892e-05	0.000140221	down	1376		Transmembrane protein [Source:UniProtKB/TrEMBL;Acc:Q0WML3]
AT1G17050	577.55	449.968	705.133	-0.648073	0.00126632	0.0107111	down	1796	SPS2	SPS2 [Source:UniProtKB/TrEMBL;Acc:A0A178W8X1]
AT1G66330	734.672	356.099	1113.25	-1.64442	2.49683e-17	1.4211e-15	down	1661	AAF	Senescence-associated protein AAF, chlorolplastic [Source:UniProtKB/Swiss-Prot;Acc:Q9C8Y4]
AT2G47450	303.762	43.5399	563.984	-3.69525	4.23829e-10	1.17808e-08	down	1815	CAO	Signal recognition particle 43 kDa protein, chloroplastic [Source:UniProtKB/Swiss-Prot;Acc:O22265]
AT5G17670	125.341	75.9885	174.693	-1.20097	1.02999e-05	0.000142832	down	1179		Alpha/beta-Hydrolases superfamily protein [Source:UniProtKB/TrEMBL;Acc:Q9FN84]
AT2G12400	1779.5	1357.75	2201.24	-0.697096	6.10113e-05	0.000717673	down	2188		Plasma membrane fusion protein [Source:UniProtKB/TrEMBL;Acc:Q8H0U2]
AT3G61870	215.326	29.3991	401.253	-3.77067	3.65449e-44	7.97632e-42	down	1299		AT3g61870/F21F14_40 [Source:UniProtKB/TrEMBL;Acc:Q9M277]
AT3G53920	331.045	254.157	407.932	-0.68261	0.00143735	0.0119624	down	2175	SIGC	RNA polymerase sigma factor sigC [Source:UniProtKB/Swiss-Prot;Acc:O24621]
AT4G13280	1719.68	864.849	2574.5	-1.57377	1.00667e-17	5.9313e-16	down	1643	TPS12	(Z)-gamma-bisabolene synthase 1 [Source:UniProtKB/Swiss-Prot;Acc:Q9T0J9]
AT4G24770	1110.81	618.789	1602.83	-1.3731	2.32815e-13	9.24628e-12	down	1582	CP31A	31 kDa ribonucleoprotein, chloroplastic [Source:UniProtKB/Swiss-Prot;Acc:Q04836]
AT4G30250	4.87109	0	9.74218	#NAME?	0.00182762	0.0147266	down	1873		P-loop containing nucleoside triphosphate hydrolases superfamily protein [Source:TAIR;Acc:AT4G30250]
AT4G23790	542.869	432.696	653.042	-0.593821	0.00279606	0.021222	down	1781	TBL24	TBL24 [Source:UniProtKB/TrEMBL;Acc:A0A178UXI7]
AT1G32540	8.30772	1.70714	14.9083	-3.12646	0.000955114	0.00835891	down	1645	LOL1	lsd one like 1 [Source:TAIR;Acc:AT1G32540]
AT1G01470	1982.43	1281.19	2683.66	-1.06671	0.00030897	0.00307866	down	1348	LEA14	LSR3 [Source:UniProtKB/TrEMBL;Acc:A0A178W160]
AT5G17010	1678.12	656.059	2700.19	-2.04116	2.44456e-10	7.04459e-09	down	2053		D-xylose-proton symporter-like 2 [Source:UniProtKB/Swiss-Prot;Acc:Q6AWX0]
AT2G46250	65.4874	39.9831	90.9918	-1.18635	0.000666574	0.00608179	down	1877		At2g46250/T3F17.10 [Source:UniProtKB/TrEMBL;Acc:O82344]
AT4G37760	950.829	17.1384	1884.52	-6.78082	3.15985e-68	1.76249e-65	down	2196	SQE3	Squalene epoxidase 3 [Source:UniProtKB/Swiss-Prot;Acc:Q8VYH2]
AT5G54770	1451.08	330.014	2572.15	-2.96238	9.55392e-07	1.59869e-05	down	1606	THI1	Thiamine thiazole synthase, chloroplastic [Source:UniProtKB/TrEMBL;Acc:A0A178UNL2]
AT4G15560	3029.65	1437.48	4621.82	-1.68492	1.98605e-09	5.10217e-08	down	2960	DXS	DXS1 [Source:UniProtKB/TrEMBL;Acc:A0A178V5I0]
AT3G29290	150.048	110.851	189.245	-0.771629	0.00206627	0.0163615	down	2399	EMB2076	Pentatricopeptide repeat-containing protein At3g29290 [Source:UniProtKB/Swiss-Prot;Acc:Q84J46]
AT1G18060	210.673	59.2899	362.055	-2.61035	7.89732e-26	7.53698e-24	down	1191		AT1g18060/T10F20.23 [Source:UniProtKB/TrEMBL;Acc:Q9LM40]
AT5G40720	254.793	166.404	343.182	-1.04429	0.000786899	0.00706408	down	2253		C3H4 type zinc finger protein (DUF23) [Source:UniProtKB/TrEMBL;Acc:Q9FM26]
AT2G01900	285.771	200.773	370.77	-0.884959	3.14715e-05	0.00039477	down	1840		DNAse I-like superfamily protein [Source:TAIR;Acc:AT2G01900]
AT1G32060	239.405	22.0022	456.808	-4.37586	5.92402e-59	2.25292e-56	down	1890	PRK	Phosphoribulokinase [Source:UniProtKB/TrEMBL;Acc:A0A178WLP9]
AT4G18422	36.7095	4.97498	68.4441	-3.78216	2.25717e-05	0.00029279	down	489		unknown protein; FUNCTIONS IN: molecular_function unknown; INVOLVED IN: biological_process unknown; LOCATED IN: cellular_component unknown; Ha. [Source:TAIR;Acc:AT4G18422]
AT5G21920	109.855	68.2064	151.503	-1.15137	2.56034e-05	0.000327881	down	812	YLMG2	YlmG homolog protein 2, chloroplastic [Source:UniProtKB/Swiss-Prot;Acc:Q9C595]
AT5G42810	562.07	434.046	690.094	-0.668945	0.000510275	0.00480534	down	1849	IPK1	Inositol-pentakisphosphate 2-kinase [Source:UniProtKB/Swiss-Prot;Acc:Q93YN9]
AT2G22990	111.241	37.0063	185.475	-2.32538	0.00302196	0.0226964	down	1730	SNG1	sinapoylglucose 1 [Source:TAIR;Acc:AT2G22990]
AT4G27180	2482.7	1958.42	3006.99	-0.618631	0.000379595	0.00370013	down	2693	KIN14M	Kinesin-like protein KIN-14M [Source:UniProtKB/Swiss-Prot;Acc:P46864]
AT5G24160	195.268	53.6108	336.925	-2.65183	8.9711e-15	4.10154e-13	down	1894	SQE6	Squalene epoxidase 6 [Source:UniProtKB/Swiss-Prot;Acc:O65402]
AT1G31790	49.7371	32.2803	67.1939	-1.05768	0.00429847	0.0305906	down	1329	PCMP-A1	Pentatricopeptide repeat-containing protein At1g31790 [Source:UniProtKB/Swiss-Prot;Acc:Q9C6R9]
AT2G30695	127.017	95.1262	158.908	-0.74028	0.00487169	0.0340421	down	1085		At2g30700/T11J7.9 [Source:UniProtKB/TrEMBL;Acc:Q945Q5]
AT5G26280	18865.2	12075.3	25655.1	-1.08719	0.000365458	0.00357746	down	1324		TRAF-like family protein [Source:TAIR;Acc:AT5G26280]
AT2G16740	1274.42	999.434	1549.4	-0.632523	0.000425973	0.00408869	down	923	UBC29	UBC29 [Source:UniProtKB/TrEMBL;Acc:A0A178VQZ9]
AT1G70640	14.3078	5.62981	22.9857	-2.02958	0.00183808	0.0147871	down	1659		At1g70640 [Source:UniProtKB/TrEMBL;Acc:Q9S843]
AT2G39310	12565.7	5381.99	19749.4	-1.8756	1.75805e-20	1.27535e-18	down	1704	JAL22	Jacalin-related lectin 22 [Source:UniProtKB/Swiss-Prot;Acc:O80950]
AT4G32190	372.606	181.905	563.307	-1.63073	2.96884e-14	1.29371e-12	down	2772		Myosin heavy chain-related protein [Source:UniProtKB/TrEMBL;Acc:Q8H1E5]
AT1G36160	10383.9	6632.39	14135.5	-1.09172	3.71015e-10	1.04167e-08	down	7410	ACC1	Acetyl-CoA carboxylase 1 [Source:UniProtKB/Swiss-Prot;Acc:Q38970]
AT5G52060	2695.2	1891.49	3498.91	-0.887384	4.6972e-07	8.29696e-06	down	2121	BAG1	BAG family molecular chaperone regulator 1 [Source:UniProtKB/Swiss-Prot;Acc:Q0WUQ1]
AT1G72645	12.4348	0.374313	24.4953	-6.03212	1.17045e-08	2.65868e-07	down	959		At1g72645 [Source:UniProtKB/TrEMBL;Acc:Q8RXY2]
AT2G35920	2053.37	1689.56	2417.18	-0.516677	0.00686487	0.0454399	down	3551		RNA helicase family protein [Source:TAIR;Acc:AT2G35920]
AT2G46930	814.919	540.61	1089.23	-1.01065	9.28166e-08	1.82865e-06	down	1730	PAE3	Pectin acetylesterase 3 [Source:UniProtKB/Swiss-Prot;Acc:O80731]
AT5G13360	322.285	146.677	497.893	-1.76319	4.62351e-16	2.38786e-14	down	2235		Auxin-responsive GH3 family protein [Source:UniProtKB/TrEMBL;Acc:F4K2J2]
AT1G65960	4541.65	3022.87	6060.43	-1.0035	8.29487e-09	1.94037e-07	down	2971	GAD2	Glutamate decarboxylase 2 [Source:UniProtKB/Swiss-Prot;Acc:Q42472]
AT1G71690	5.81226	0.729865	10.8947	-3.89985	0.00140062	0.0117068	down	1124		At1g71690 [Source:UniProtKB/TrEMBL;Acc:Q9C9J1]
AT1G64380	260.271	52.938	467.603	-3.14291	3.3286e-07	6.03669e-06	down	1624	ERF061	Ethylene-responsive transcription factor ERF061 [Source:UniProtKB/Swiss-Prot;Acc:Q9C7W2]
AT2G01580	170.282	131.016	209.549	-0.677547	0.00583941	0.0395812	down	927		At2g01580 [Source:UniProtKB/TrEMBL;Acc:Q9ZVE8]
AT2G42300	427.184	306.562	547.805	-0.837483	3.35546e-05	0.000417768	down	2466	BHLH48	Transcription factor bHLH48 [Source:UniProtKB/Swiss-Prot;Acc:Q8VZ02]
AT4G37480	383.662	259.961	507.363	-0.964725	4.52763e-06	6.73485e-05	down	1730		Chaperone DnaJ-domain superfamily protein [Source:UniProtKB/TrEMBL;Acc:F4JS27]
AT4G04760	40.298	21.6437	58.9523	-1.4456	0.000204363	0.00212314	down	1452		Sugar transporter ERD6-like 15 [Source:UniProtKB/Swiss-Prot;Acc:Q9M0Z9]
AT2G21330	105.445	9.64992	201.241	-4.38226	2.36548e-23	1.96601e-21	down	1699	FBA1	Fructose-bisphosphate aldolase 1, chloroplastic [Source:UniProtKB/Swiss-Prot;Acc:Q9SJU4]
AT1G60600	73.8815	22.7055	125.058	-2.46148	3.26059e-13	1.27876e-11	down	1842	ABC4	2-carboxy-1,4-naphthoquinone phytyltransferase, chloroplastic [Source:UniProtKB/Swiss-Prot;Acc:Q0WUA3]
AT1G53910	6104.32	4970.68	7237.97	-0.542142	0.00162103	0.013262	down	1654	RAP2-12	Ethylene-responsive transcription factor RAP2-12 [Source:UniProtKB/Swiss-Prot;Acc:Q9SSA8]
AT5G46390	152.57	106.684	198.455	-0.89547	0.000248334	0.00253079	down	1788	CTPA1	Carboxyl-terminal-processing peptidase 1, chloroplastic [Source:UniProtKB/Swiss-Prot;Acc:F4KHG6]
AT5G65870	176.132	126.509	225.754	-0.835507	0.000429696	0.00411969	down	1102	PSK5	Phytosulfokines 5 [Source:UniProtKB/Swiss-Prot;Acc:Q9FEB4]
AT3G27110	620.553	480.442	760.663	-0.662895	0.000907078	0.00799988	down	1170		AT3G27110 protein [Source:UniProtKB/TrEMBL;Acc:Q9LSC4]
AT3G46530	87.0041	45.6755	128.333	-1.4904	8.25796e-07	1.39956e-05	down	3163	RPP13	Disease resistance protein RPP13 [Source:UniProtKB/Swiss-Prot;Acc:Q9M667]
AT1G07985	70.3215	33.7257	106.917	-1.66458	3.04097e-07	5.54711e-06	down	942		Expressed protein [Source:UniProtKB/TrEMBL;Acc:Q3EDG6]
AT5G63580	216.715	104.018	329.413	-1.66307	2.11021e-12	7.63203e-11	down	1334	FLS2	Putative inactive flavonol synthase 2 [Source:UniProtKB/Swiss-Prot;Acc:B2GVM7]
AT2G42600	1723.61	1293.54	2153.68	-0.73548	4.60635e-05	0.000555862	down	3398	PPC2	PPC2 [Source:UniProtKB/TrEMBL;Acc:A0A178VV64]
AT4G36530	278.989	21.8639	536.115	-4.61592	1.01893e-51	2.93968e-49	down	1590		Alpha/beta-Hydrolases superfamily protein [Source:UniProtKB/TrEMBL;Acc:O23227]
AT3G18960	49.9393	24.7941	75.0844	-1.59851	0.00024068	0.00246775	down	736		B3 domain-containing protein At3g18960 [Source:UniProtKB/Swiss-Prot;Acc:Q84R27]
AT1G08980	384.7	174.487	594.914	-1.76957	1.43577e-06	2.33255e-05	down	1573	AMI1	Amidase 1 [Source:UniProtKB/Swiss-Prot;Acc:Q9FR37]
AT5G20070	1475.28	864.906	2085.66	-1.26989	2.91324e-12	1.0328e-10	down	1562	NUDT19	Nudix hydrolase 19, chloroplastic [Source:UniProtKB/Swiss-Prot;Acc:Q94A82]
AT1G07700	301.002	193.678	408.325	-1.07606	1.02138e-06	1.69667e-05	down	1328		Thioredoxin superfamily protein [Source:TAIR;Acc:AT1G07700]
AT1G74940	657.847	516.507	799.186	-0.629743	0.000777648	0.00698603	down	1395	FLZ13	FCS-Like Zinc finger 13 [Source:UniProtKB/Swiss-Prot;Acc:Q8GRN0]
AT5G20380	402.153	252.328	551.978	-1.12931	6.36501e-08	1.28736e-06	down	2004	PHT4;5	phosphate transporter 4;5 [Source:TAIR;Acc:AT5G20380]
AT1G68010	230.904	13.8359	447.972	-5.01692	2.62229e-65	1.34326e-62	down	1486	HPR	hydroxypyruvate reductase [Source:TAIR;Acc:AT1G68010]
AT1G71810	337.323	213.131	461.514	-1.11463	1.77932e-05	0.000235593	down	2487		Uncharacterized aarF domain-containing protein kinase At1g71810, chloroplastic [Source:UniProtKB/Swiss-Prot;Acc:Q94BU1]
AT5G53490	104.118	28.5911	179.645	-2.65151	3.48758e-11	1.10668e-09	down	980		Tetratricopeptide repeat (TPR)-like superfamily protein [Source:TAIR;Acc:AT5G53490]
AT2G30150	171.774	127.556	215.993	-0.759849	0.00124456	0.0105393	down	1547		UDP-Glycosyltransferase superfamily protein [Source:TAIR;Acc:AT2G30150]
AT2G35300	7.61181	1.31407	13.9096	-3.40397	0.000928489	0.00814931	down	634	LEA18	Late embryogenesis abundant protein 18 [Source:UniProtKB/Swiss-Prot;Acc:Q96273]
AT4G36670	223.407	69.4622	377.352	-2.44161	0.000185857	0.00195352	down	1911	PLT6	At4g36670 [Source:UniProtKB/TrEMBL;Acc:A4VCM1]
AT5G17700	611.216	171.372	1051.06	-2.61664	1.32987e-10	3.97379e-09	down	2349	DTX25	Protein DETOXIFICATION [Source:UniProtKB/TrEMBL;Acc:A0A178UJQ3]
AT2G40400	747.911	578.138	917.684	-0.666583	0.000479836	0.00454624	down	2469	RER5	Protein RETICULATA-RELATED 5, chloroplastic [Source:UniProtKB/Swiss-Prot;Acc:Q9SIY5]
AT1G62500	46.1667	17.5466	74.7869	-2.0916	4.41941e-06	6.59496e-05	down	1580		Bifunctional inhibitor/lipid-transfer protein/seed storage 2S albumin superfamily protein [Source:UniProtKB/TrEMBL;Acc:Q9SXE7]
AT1G31935	409.943	330.506	489.381	-0.566283	0.00533337	0.0367263	down	529		other RNA [Source:TAIR;Acc:AT1G31935]
AT3G23920	1601.31	1211.78	1990.85	-0.716263	0.00551167	0.0377677	down	2519	BAM1	Beta-amylase [Source:UniProtKB/TrEMBL;Acc:A0A178VNG4]
AT5G02790	1123.97	879.143	1368.79	-0.638736	0.000588373	0.00545756	down	1171	GSTL3	Glutathione S-transferase L3 [Source:UniProtKB/Swiss-Prot;Acc:Q9LZ06]
AT1G50250	1019.93	52.9303	1986.93	-5.2303	8.57036e-74	5.97545e-71	down	2573	FTSH1	ATP-dependent zinc metalloprotease FTSH 1, chloroplastic [Source:UniProtKB/Swiss-Prot;Acc:Q39102]
AT2G01420	1362.8	1047.94	1677.65	-0.678879	0.000181559	0.0019151	down	2929	PIN4	Auxin efflux carrier component [Source:UniProtKB/TrEMBL;Acc:A0A178VZS2]
AT2G22890	72.1189	49.7555	94.4823	-0.925189	0.00399812	0.0287533	down	1244	FAD4L2	Fatty acid desaturase 4-like 2, chloroplastic [Source:UniProtKB/Swiss-Prot;Acc:O81006]
AT5G28840	2143.71	1620.11	2667.3	-0.719284	5.56392e-05	0.000658436	down	1721	GME	GDP-mannose 3,5-epimerase [Source:UniProtKB/Swiss-Prot;Acc:Q93VR3]
AT1G06540	41.9577	18.0031	65.9124	-1.8723	0.00196817	0.0156929	down	1933		F12K11.13 [Source:UniProtKB/TrEMBL;Acc:Q9SHJ7]
AT1G13610	65.9423	22.8692	109.015	-2.25306	6.89365e-11	2.12307e-09	down	1357		Alpha/beta-Hydrolases superfamily protein [Source:UniProtKB/TrEMBL;Acc:Q9FZ68]
AT3G01060	35.5107	7.86642	63.155	-3.00512	3.99077e-10	1.1167e-08	down	1615		Lysine-tRNA ligase [Source:UniProtKB/TrEMBL;Acc:Q8RWI4]
AT5G34940	1057.31	757.543	1357.07	-0.841097	5.7283e-06	8.40672e-05	down	1779	AtGUS3	Heparanase-like protein 3 [Source:UniProtKB/Swiss-Prot;Acc:Q9FZP1]
AT3G47560	172.124	118.668	225.581	-0.92671	0.00016703	0.00178024	down	1046		Alpha/beta-Hydrolases superfamily protein [Source:UniProtKB/TrEMBL;Acc:F4JBL2]
AT1G80330	3.24422	0	6.48844	#NAME?	0.00473382	0.0332082	down	1068	GA3OX4	Gibberellin 3-beta-dioxygenase 4 [Source:UniProtKB/Swiss-Prot;Acc:Q9C971]
AT1G54290	355.452	283.408	427.497	-0.593036	0.00453862	0.0320538	down	855		Protein translation factor SUI1 homolog 2 [Source:UniProtKB/Swiss-Prot;Acc:Q94JV4]
AT1G73650	1225.4	152.747	2298.05	-3.9112	3.98729e-36	6.21622e-34	down	1241		Protein of unknown function (DUF1295) [Source:TAIR;Acc:AT1G73650]
AT2G30790	15.7315	3.37676	28.0861	-3.05615	8.28865e-06	0.00011754	down	1010	PSBP2	Putative oxygen-evolving enhancer protein 2-2 [Source:UniProtKB/Swiss-Prot;Acc:O49344]
AT5G62020	468.636	349.99	587.281	-0.746737	0.00605982	0.0408472	down	1754	HSFB2A	HSFB2A [Source:UniProtKB/TrEMBL;Acc:A0A384KDZ5]
AT3G57180	96.6466	68.2435	125.05	-0.873739	0.00251877	0.0194049	down	2232	BPG2	P-loop containing nucleoside triphosphate hydrolases superfamily protein [Source:TAIR;Acc:AT3G57180]
AT5G56530	1533.99	1234.51	1833.47	-0.570637	0.00186942	0.0150248	down	1931		Similarity to carboxyl-terminal proteinase [Source:UniProtKB/TrEMBL;Acc:Q9LVC1]
AT1G78476	16.4556	2.60143	30.3098	-3.54241	2.05375e-07	3.81281e-06	down	638		unknown protein. [Source:TAIR;Acc:AT1G78476]
AT3G09650	293.45	160.183	426.717	-1.41355	6.50886e-11	2.01446e-09	down	2624	HCF152	HCF152 [Source:UniProtKB/TrEMBL;Acc:A0A178V9F2]
AT2G40390	325.211	230.438	419.984	-0.865959	0.00393977	0.0284325	down	1726		Neuronal PAS domain protein [Source:UniProtKB/TrEMBL;Acc:Q6DR18]
AT3G20100	961.097	603.859	1318.34	-1.12643	2.44013e-09	6.19913e-08	down	1982	CYP705A19	AT3g20100/MAL21_14 [Source:UniProtKB/TrEMBL;Acc:Q9LJY8]
AT5G13730	11.0734	1.49725	20.6495	-3.78572	1.03239e-05	0.000143087	down	1454	SIGD	RNA polymerase sigma factor sigD, chloroplastic [Source:UniProtKB/Swiss-Prot;Acc:Q9ZSL6]
AT2G02980	48.0833	29.9299	66.2367	-1.14604	0.00202383	0.01605	down	2074	PCMP-H26	Pentatricopeptide repeat-containing protein At2g02980, chloroplastic [Source:UniProtKB/Swiss-Prot;Acc:Q8LK93]
AT2G15970	4401.77	1542.33	7261.2	-2.2351	7.28232e-35	1.0505e-32	down	919	COR413PM1	WCOR413-like protein [Source:UniProtKB/TrEMBL;Acc:A0A178VY40]
AT3G51420	18.49	0.748625	36.2314	-5.59685	1.14323e-11	3.83624e-10	down	2064	SSL4	SSL4 [Source:UniProtKB/TrEMBL;Acc:A0A178VDG6]
AT5G58010	509.861	392.171	627.55	-0.678247	0.000343492	0.00338104	down	1323	BHLH82	LRL3 [Source:UniProtKB/TrEMBL;Acc:A0A178UI77]
AT4G13010	993.862	274.297	1713.43	-2.64308	4.38681e-40	8.03716e-38	down	1349	CEQORH	Chloroplast envelope quinone oxidoreductase homolog [Source:UniProtKB/Swiss-Prot;Acc:Q9SV68]
AT5G51550	1355.33	1028.04	1682.62	-0.710821	0.00126656	0.0107111	down	1533	EXL3	Protein EXORDIUM-like 3 [Source:UniProtKB/Swiss-Prot;Acc:Q9FHM9]
AT5G53890	894.614	580.904	1208.32	-1.05663	2.70355e-08	5.79992e-07	down	3792	PSKR2	Leucine-rich repeat receptor-like protein kinase (Fragment) [Source:UniProtKB/TrEMBL;Acc:C0LGV8]
AT1G20990	103.407	70.8314	135.983	-0.940969	0.00206637	0.0163615	down	1382		Cysteine/Histidine-rich C1 domain family protein [Source:UniProtKB/TrEMBL;Acc:F4HWC5]
AT5G09660	51.4266	24.1378	78.7154	-1.70535	0.00303877	0.0227953	down	1468	PMDH2	Malate dehydrogenase [Source:UniProtKB/TrEMBL;Acc:B3H560]
AT3G26710	164.656	75.9487	253.364	-1.73811	8.49408e-05	0.0009669	down	1277	CCB1	Protein COFACTOR ASSEMBLY OF COMPLEX C SUBUNIT B CCB1, chloroplastic [Source:UniProtKB/Swiss-Prot;Acc:Q9LSE4]
AT4G16770	368.03	264.065	471.995	-0.837877	6.19028e-05	0.000726734	down	1717		2-oxoglutarate (2OG) and Fe(II)-dependent oxygenase superfamily protein [Source:TAIR;Acc:AT4G16770]
AT2G23460	1532.86	1240.51	1825.21	-0.557127	0.00365716	0.026703	down	3078	XLG1	Extra-large guanine nucleotide-binding protein 1 [Source:UniProtKB/Swiss-Prot;Acc:O80462]
AT1G22630	11.8537	0.666414	23.0409	-5.11163	1.75535e-07	3.29538e-06	down	734		At1g22630/F12K8_2 [Source:UniProtKB/TrEMBL;Acc:Q9SKA5]
AT3G23530	2213.85	226.255	4201.44	-4.21486	3.42701e-32	4.43392e-30	down	3413		AT3g23510/MEE5_5 [Source:UniProtKB/TrEMBL;Acc:Q8VZH1]
AT1G48870	102.981	42.2554	163.707	-1.95391	9.23016e-06	0.000129529	down	2300		Transducin/WD40 repeat-like superfamily protein [Source:UniProtKB/TrEMBL;Acc:Q9FVP7]
AT5G60920	6486.11	4867.5	8104.72	-0.735581	1.81067e-05	0.000239324	down	2099	COB	Protein COBRA [Source:UniProtKB/Swiss-Prot;Acc:Q94KT8]
AT2G16890	749.226	282.848	1215.6	-2.10358	0.000439141	0.00419742	down	1896	UGT90A1	UDP-glycosyltransferase 90A1 [Source:UniProtKB/Swiss-Prot;Acc:Q9ZVX4]
AT1G15100	1488.49	824.815	2152.16	-1.38364	4.62525e-14	1.98112e-12	down	931	RHA2A	E3 ubiquitin-protein ligase RHA2A [Source:UniProtKB/Swiss-Prot;Acc:Q9ZT50]
AT3G49760	338.357	210.514	466.201	-1.14703	1.30952e-07	2.52063e-06	down	895	AtbZIP5	At3g49760 [Source:UniProtKB/TrEMBL;Acc:Q29PT3]
[truncated: 3,262 more rows]

## Sheet: hy5-illuminated
Up-regulated and down-regulated genes in hy5- covered, hy5-illuminated and WT-covered compared to the WT-illuminated
[truncated: 4,108 more rows]

[truncated: 1 more sheets: overlapping genes]
