# Supplementary material for: HY5 Contributes to Light-Regulated Root System Architecture Under a Root-Covered Culture System
Source: Front Plant Sci. 2019 Nov 28;10:1490. doi: 10.3389/fpls.2019.01490 (PMC6892842; doi:10.3389/fpls.2019.01490)
Supplement: Table S2 — Putative HY5 target genes identified in the clusters of upregulated and downregulated differentially expressed genes (DEGs), respectively. [file Table_2.xlsx]

## Sheet: Putative HY5 targets
Supplemental Table S2 Putative HY5 target genes in clusters of up-regulated and down-regulated differentially expressed genes (DEGs), respectively
Gene ID	Gene name	Gene brief description	Differentially gene exoression
AT4G09750		NAD(P)-binding Rossmann-fold superfamily protein [Source:UniProtKB/TrEMBL;Acc:Q9SZ91]	down
AT2G21960		Expressed protein [Source:UniProtKB/TrEMBL;Acc:Q9SJ03]	down
AT1G62750	CPEFG	Elongation factor G, chloroplastic [Source:UniProtKB/Swiss-Prot;Acc:Q9SI75]	down
AT2G20260	PSAE2	Photosystem I reaction center subunit IV B, chloroplastic [Source:UniProtKB/Swiss-Prot;Acc:Q9S714]	down
AT5G43630	TZP	Zinc knuckle (CCHC-type) family protein [Source:UniProtKB/TrEMBL;Acc:Q9FIX7]	down
AT4G05180	PSBQ2	Oxygen-evolving enhancer protein 3-2, chloroplastic [Source:UniProtKB/Swiss-Prot;Acc:Q41932]	down
AT5G15970	KIN2	KIN2 [Source:UniProtKB/TrEMBL;Acc:A0A384KRF8]	down
AT2G41370	NPR5	Regulatory protein NPR5 [Source:UniProtKB/Swiss-Prot;Acc:Q9ZVC2]	down
AT3G47620	TCP14	Transcription factor TCP14 [Source:UniProtKB/Swiss-Prot;Acc:Q93Z00]	down
AT1G16850		At1g16880 [Source:UniProtKB/TrEMBL;Acc:Q9FE54]	down
AT1G35720	ANN1	Annexin [Source:UniProtKB/TrEMBL;Acc:A0A178WGZ8]	down
AT1G23740	AOR	NADPH-dependent alkenal/one oxidoreductase, chloroplastic [Source:UniProtKB/Swiss-Prot;Acc:Q9ZUC1]	down
AT1G15980	PNSB1	Photosynthetic NDH subunit of subcomplex B 1, chloroplastic [Source:UniProtKB/Swiss-Prot;Acc:Q9S9N6]	down
AT5G24770	VSP2	Vegetative storage protein 2 [Source:UniProtKB/Swiss-Prot;Acc:O82122]	down
AT3G16520	UGT88A1	UDP-glycosyltransferase 88A1 [Source:UniProtKB/Swiss-Prot;Acc:Q9LK73]	down
AT3G63490	RPL1	50S ribosomal protein L1, chloroplastic [Source:UniProtKB/Swiss-Prot;Acc:Q9LY66]	down
AT1G52870		At1g52870/F14G24_14 [Source:UniProtKB/TrEMBL;Acc:Q9C933]	down
AT3G04420	anac048	AT3g04420/T27C4_6 [Source:UniProtKB/TrEMBL;Acc:Q8W4R4]	down
AT5G14700		Cinnamoyl CoA reductase-like protein [Source:UniProtKB/TrEMBL;Acc:Q9LYJ0]	down
AT3G46780	PTAC16	Protein PLASTID TRANSCRIPTIONALLY ACTIVE 16, chloroplastic [Source:UniProtKB/Swiss-Prot;Acc:Q9STF2]	down
AT5G59960		unknown protein; FUNCTIONS IN: molecular_function unknown; INVOLVED IN: biological_process unknown; LOCATED IN: nucleus; EXPRESSED IN: 24 plant structures; EXPRESSED DURING: 15 growth stages; Ha. [Source:TAIR;Acc:AT5G59960]	down
AT4G09650	ATPD	PDE332 [Source:UniProtKB/TrEMBL;Acc:A0A178V1L3]	down
AT1G50450		At1g50450/F11F12_20 [Source:UniProtKB/TrEMBL;Acc:Q94BZ0]	down
AT5G07190	ATS3	Embryo-specific protein ATS3 [Source:UniProtKB/Swiss-Prot;Acc:Q9LYP6]	down
AT2G33250		At2g33250/F25I18.1 [Source:UniProtKB/TrEMBL;Acc:O22777]	down
AT1G09850	XBCP3	At1g09850 [Source:UniProtKB/TrEMBL;Acc:Q0WVJ5]	down
AT5G16010		3-oxo-5-alpha-steroid 4-dehydrogenase family protein [Source:UniProtKB/TrEMBL;Acc:Q9LFS3]	down
AT1G19150	LHCA6	Photosystem I chlorophyll a/b-binding protein 6, chloroplastic [Source:UniProtKB/Swiss-Prot;Acc:Q8LCQ4]	down
AT4G26150	GATA22	Putative GATA transcription factor 22 [Source:UniProtKB/Swiss-Prot;Acc:Q9SZI6]	down
AT3G57190	PRFB3	PrfB3 [Source:UniProtKB/TrEMBL;Acc:A0A178VAE2]	down
AT5G09930	ABCF2	ABC transporter F family member 2 [Source:UniProtKB/Swiss-Prot;Acc:Q9FIB4]	down
AT1G03600	PSB27-1	Photosystem II repair protein PSB27-H1, chloroplastic [Source:UniProtKB/Swiss-Prot;Acc:Q9LR64]	down
AT4G04330	RBCX1	Chaperonin-like RBCX protein 1, chloroplastic [Source:UniProtKB/Swiss-Prot;Acc:Q94AU9]	down
AT1G12250	TL20.3	Thylakoid lumenal protein TL20.3, chloroplastic [Source:UniProtKB/Swiss-Prot;Acc:Q8H1Q1]	down
AT3G52740	BIC1	Protein BIC1 [Source:UniProtKB/Swiss-Prot;Acc:Q9LXJ1]	down
AT4G37800	XTH7	Probable xyloglucan endotransglucosylase/hydrolase protein 7 [Source:UniProtKB/Swiss-Prot;Acc:Q8LER3]	down
AT3G26310	CYP71B35	Putative cytochrome P450 [Source:UniProtKB/TrEMBL;Acc:Q0WVN2]	down
AT3G52880	ATMDAR1	Monodehydroascorbate reductase 1 [Source:UniProtKB/TrEMBL;Acc:F4J849]	down
AT4G03020		Putative WD-repeat protein [Source:UniProtKB/TrEMBL;Acc:Q8LPI5]	down
AT5G52250	RUP1	WD repeat-containing protein RUP1 [Source:UniProtKB/Swiss-Prot;Acc:Q9LTJ6]	down
AT1G24340	EMB260	FAD/NAD(P)-binding oxidoreductase family protein [Source:UniProtKB/TrEMBL;Acc:Q8GYJ7]	down
AT3G62410	CP12-2	Calvin cycle protein CP12-2, chloroplastic [Source:UniProtKB/Swiss-Prot;Acc:Q9LZP9]	down
AT4G28750	PSAE1	Photosystem I reaction center subunit IV A, chloroplastic [Source:UniProtKB/Swiss-Prot;Acc:Q9S831]	down
AT2G44210		AT2G44210 protein [Source:UniProtKB/TrEMBL;Acc:B9DGK6]	down
AT5G52420		Transmembrane protein [Source:UniProtKB/TrEMBL;Acc:Q9FHB8]	down
AT3G11560		AT3G11560 protein [Source:UniProtKB/TrEMBL;Acc:Q8H0W4]	down
AT1G53090	SPA4	SPA4 [Source:UniProtKB/TrEMBL;Acc:A0A178WBA0]	down
AT5G13930	CHS	Chalcone synthase family protein [Source:UniProtKB/TrEMBL;Acc:Q460R0]	down
AT2G46820	CURT1B	Protein CURVATURE THYLAKOID 1B, chloroplastic [Source:UniProtKB/Swiss-Prot;Acc:Q8LCA1]	down
AT4G15530	PPDK	Pyruvate, phosphate dikinase 1, chloroplastic [Source:UniProtKB/Swiss-Prot;Acc:O23404]	down
AT1G64860	SIGA	RNA polymerase sigma factor sigA [Source:UniProtKB/Swiss-Prot;Acc:O24629]	down
AT3G15520	CYP37	Peptidyl-prolyl cis-trans isomerase CYP37, chloroplastic [Source:UniProtKB/Swiss-Prot;Acc:P82869]	down
AT1G79040	PSBR	Photosystem II 10 kDa polypeptide, chloroplastic [Source:UniProtKB/Swiss-Prot;Acc:P27202]	down
AT5G63450	CYP94B1	cytochrome P450, family 94, subfamily B, polypeptide 1 [Source:TAIR;Acc:AT5G63450]	down
AT1G49660	CXE5	Probable carboxylesterase 5 [Source:UniProtKB/Swiss-Prot;Acc:Q9FX94]	down
AT5G02280		SNARE-like superfamily protein [Source:UniProtKB/TrEMBL;Acc:Q9LZ97]	down
AT2G43910	ATHOL1	HOL1 [Source:UniProtKB/TrEMBL;Acc:A0A178VXT1]	down
AT1G18730	PNSB4	Photosynthetic NDH subunit of subcomplex B 4, chloroplastic [Source:UniProtKB/Swiss-Prot;Acc:Q8RXS1]	down
AT5G24060		Pentatricopeptide repeat (PPR) superfamily protein [Source:UniProtKB/TrEMBL;Acc:F4KFP8]	down
AT4G15765		FAD/NAD(P)-binding oxidoreductase family protein [Source:UniProtKB/TrEMBL;Acc:F4JK86]	down
AT3G47470	LHCA4	Chlorophyll a-b binding protein, chloroplastic [Source:UniProtKB/TrEMBL;Acc:A0A178VEE6]	down
AT2G28550	RAP2.7	Related to AP2.7 [Source:UniProtKB/TrEMBL;Acc:F4IIR3]	down
AT2G41660	MIZ1	MIZ1 [Source:UniProtKB/TrEMBL;Acc:A0A178VY97]	down
AT5G17230	PSY	PHYTOENE SYNTHASE [Source:UniProtKB/TrEMBL;Acc:F4KGX7]	down
AT2G37040	PAL1	Phenylalanine ammonia-lyase 1 [Source:UniProtKB/Swiss-Prot;Acc:P35510]	down
AT5G51110	ATP1	Probable pterin-4-alpha-carbinolamine dehydratase, chloroplastic [Source:UniProtKB/Swiss-Prot;Acc:Q9LU63]	down
AT2G47460	MYB12	Transcription factor MYB12 [Source:UniProtKB/Swiss-Prot;Acc:O22264]	down
AT3G17609	HYH	HYH [Source:UniProtKB/TrEMBL;Acc:A0A178VIU6]	down
AT4G03420		AT4g03420/F9H3_4 [Source:UniProtKB/TrEMBL;Acc:Q8S9K9]	down
AT1G17830		At1g17830 [Source:UniProtKB/TrEMBL;Acc:Q9LMU5]	down
AT2G33180		Uncharacterized protein At2g33180 [Source:UniProtKB/TrEMBL;Acc:O49317]	down
AT2G37660		Uncharacterized protein At2g37660, chloroplastic [Source:UniProtKB/Swiss-Prot;Acc:O80934]	down
AT5G57030	LUT2	Lycopene epsilon cyclase, chloroplastic [Source:UniProtKB/Swiss-Prot;Acc:Q38932]	down
AT5G48880	KAT5	PKT2 [Source:UniProtKB/TrEMBL;Acc:A0A178UEC0]	down
AT1G74470	CHLP	Geranylgeranyl diphosphate reductase, chloroplastic [Source:UniProtKB/Swiss-Prot;Acc:Q9CA67]	down
AT4G37470	KAI2	KAI2 [Source:UniProtKB/TrEMBL;Acc:A0A178V1E5]	down
AT1G65060	4CL3	4-coumarate--CoA ligase 3 [Source:UniProtKB/Swiss-Prot;Acc:Q9S777]	down
AT5G02940		Protein of unknown function (DUF1012) [Source:TAIR;Acc:AT5G02940]	down
AT1G67030	ZFP6	Zinc finger protein 6 [Source:UniProtKB/Swiss-Prot;Acc:Q39265]	down
AT4G27030	FAD4	FADA [Source:UniProtKB/TrEMBL;Acc:A0A178UUY9]	down
AT3G54050	CFBP1	Fructose-1,6-bisphosphatase 1, chloroplastic [Source:UniProtKB/Swiss-Prot;Acc:P25851]	down
AT5G59760		Putative uncharacterized protein [Source:UniProtKB/TrEMBL;Acc:Q58FT1]	down
AT1G76100	PETE1	plastocyanin 1 [Source:TAIR;Acc:AT1G76100]	down
AT3G61250	AtMYB17	Transcription factor MYB41 [Source:UniProtKB/Swiss-Prot;Acc:Q9M2D9]	down
AT5G26820	IREG3	Solute carrier family 40 member 3, chloroplastic [Source:UniProtKB/Swiss-Prot;Acc:Q8W4E7]	down
AT5G58760	DDB2	Protein DAMAGED DNA-BINDING 2 [Source:UniProtKB/Swiss-Prot;Acc:Q6NQ88]	down
AT2G46535		Uncharacterized protein At2g46535 [Source:UniProtKB/TrEMBL;Acc:Q84JE7]	down
AT5G23120	HCF136	photosystem II stability/assembly factor, chloroplast (HCF136) [Source:TAIR;Acc:AT5G23120]	down
AT5G05170	CESA3	Cellulose synthase A catalytic subunit 3 [UDP-forming] [Source:UniProtKB/Swiss-Prot;Acc:Q941L0]	down
AT2G24790	COL3	Zinc finger protein CONSTANS-LIKE 3 [Source:UniProtKB/Swiss-Prot;Acc:Q9SK53]	down
AT5G65640	BHLH93	Transcription factor bHLH93 [Source:UniProtKB/Swiss-Prot;Acc:Q9LSL1]	down
AT1G48840		Heat-inducible transcription repressor (DUF639) [Source:UniProtKB/TrEMBL;Acc:Q8VXZ2]	down
AT1G13670		At1g13670 [Source:UniProtKB/TrEMBL;Acc:Q9LMY0]	down
AT2G29630	THIC	Phosphomethylpyrimidine synthase, chloroplastic [Source:UniProtKB/Swiss-Prot;Acc:O82392]	down
AT2G29980	FAD3	FAD3 [Source:UniProtKB/TrEMBL;Acc:A0A178VX43]	down
AT4G15480	UGT84A1	UDP-glycosyltransferase 84A1 [Source:UniProtKB/Swiss-Prot;Acc:Q5XF20]	down
AT3G48690	CXE12	Probable carboxylesterase 12 [Source:UniProtKB/Swiss-Prot;Acc:Q9SMN0]	down
AT4G24240	WRKY7	Probable WRKY transcription factor 7 [Source:UniProtKB/Swiss-Prot;Acc:Q9STX0]	down
AT2G36870	XTH32	Probable xyloglucan endotransglucosylase/hydrolase protein 32 [Source:UniProtKB/Swiss-Prot;Acc:Q9SJL9]	down
AT1G47128	RD21A	RD21A [Source:UniProtKB/TrEMBL;Acc:A0A178WIH7]	down
AT2G02950	PKS1	Protein PHYTOCHROME KINASE SUBSTRATE 1 [Source:UniProtKB/Swiss-Prot;Acc:Q9SWI1]	down
AT1G15500	AATP2	ADP,ATP carrier protein [Source:UniProtKB/TrEMBL;Acc:A0A178WDN7]	down
AT5G04000		unknown protein; Ha. [Source:TAIR;Acc:AT5G04000]	down
AT5G09230	SRT2	sirtuin 2 [Source:TAIR;Acc:AT5G09230]	down
AT1G50290		At1g50290/F14I3_12 [Source:UniProtKB/TrEMBL;Acc:Q944R3]	down
AT1G53670	MSRB1	Peptide methionine sulfoxide reductase B1, chloroplastic [Source:UniProtKB/Swiss-Prot;Acc:Q9C8M2]	down
AT2G40080	ELF4	Protein EARLY FLOWERING 4 [Source:UniProtKB/Swiss-Prot;Acc:O04211]	down
AT3G23805	RALFL24	Protein RALF-like 24 [Source:UniProtKB/Swiss-Prot;Acc:Q9LK37]	down
AT3G51750		Uncharacterized protein At3g51750 [Source:UniProtKB/TrEMBL;Acc:Q9SCT3]	down
AT5G17010		D-xylose-proton symporter-like 2 [Source:UniProtKB/Swiss-Prot;Acc:Q6AWX0]	down
AT4G37760	SQE3	Squalene epoxidase 3 [Source:UniProtKB/Swiss-Prot;Acc:Q8VYH2]	down
AT4G15560	DXS	DXS1 [Source:UniProtKB/TrEMBL;Acc:A0A178V5I0]	down
AT5G26280		TRAF-like family protein [Source:TAIR;Acc:AT5G26280]	down
AT4G32190		Myosin heavy chain-related protein [Source:UniProtKB/TrEMBL;Acc:Q8H1E5]	down
AT5G13360		Auxin-responsive GH3 family protein [Source:UniProtKB/TrEMBL;Acc:F4K2J2]	down
AT1G64380	ERF061	Ethylene-responsive transcription factor ERF061 [Source:UniProtKB/Swiss-Prot;Acc:Q9C7W2]	down
AT4G37480		Chaperone DnaJ-domain superfamily protein [Source:UniProtKB/TrEMBL;Acc:F4JS27]	down
AT2G21330	FBA1	Fructose-bisphosphate aldolase 1, chloroplastic [Source:UniProtKB/Swiss-Prot;Acc:Q9SJU4]	down
AT1G07985		Expressed protein [Source:UniProtKB/TrEMBL;Acc:Q3EDG6]	down
AT4G36530		Alpha/beta-Hydrolases superfamily protein [Source:UniProtKB/TrEMBL;Acc:O23227]	down
AT5G20070	NUDT19	Nudix hydrolase 19, chloroplastic [Source:UniProtKB/Swiss-Prot;Acc:Q94A82]	down
AT1G50250	FTSH1	ATP-dependent zinc metalloprotease FTSH 1, chloroplastic [Source:UniProtKB/Swiss-Prot;Acc:Q39102]	down
AT3G01060		Lysine-tRNA ligase [Source:UniProtKB/TrEMBL;Acc:Q8RWI4]	down
AT3G09650	HCF152	HCF152 [Source:UniProtKB/TrEMBL;Acc:A0A178V9F2]	down
AT2G15970	COR413PM1	WCOR413-like protein [Source:UniProtKB/TrEMBL;Acc:A0A178VY40]	down
AT4G13010	CEQORH	Chloroplast envelope quinone oxidoreductase homolog [Source:UniProtKB/Swiss-Prot;Acc:Q9SV68]	down
AT3G23530		AT3g23510/MEE5_5 [Source:UniProtKB/TrEMBL;Acc:Q8VZH1]	down
AT1G48870		Transducin/WD40 repeat-like superfamily protein [Source:UniProtKB/TrEMBL;Acc:Q9FVP7]	down
AT1G15100	RHA2A	E3 ubiquitin-protein ligase RHA2A [Source:UniProtKB/Swiss-Prot;Acc:Q9ZT50]	down
AT2G32390	GLR3.5	Glutamate receptor 3.5 [Source:UniProtKB/Swiss-Prot;Acc:Q9SW97]	down
AT2G32640		Lycopene beta/epsilon cyclase protein [Source:UniProtKB/TrEMBL;Acc:Q0WVA1]	down
AT2G40480		WEB family protein At2g40480 [Source:UniProtKB/Swiss-Prot;Acc:Q5XVC7]	down
AT5G55220	TIG	Trigger factor-like protein TIG, Chloroplastic [Source:UniProtKB/Swiss-Prot;Acc:Q8S9L5]	down
AT3G11050	FER2	Ferritin-2, chloroplastic [Source:UniProtKB/Swiss-Prot;Acc:Q9SRL5]	down
AT3G17040	HCF107	Protein high chlorophyll fluorescent 107 [Source:UniProtKB/Swiss-Prot;Acc:Q8RWG2]	down
AT1G54740		Protein of unknown function (DUF3049) [Source:TAIR;Acc:AT1G54740]	down
AT5G51040		Succinate dehydrogenase assembly factor [Source:UniProtKB/TrEMBL;Acc:F4KBT8]	down
AT2G32560		F-box protein At2g32560 [Source:UniProtKB/Swiss-Prot;Acc:Q8RY82]	down
AT3G62190		AT3g62190/T17J13_150 [Source:UniProtKB/TrEMBL;Acc:Q9M1Q5]	down
AT4G38970	FBA2	Fructose-bisphosphate aldolase [Source:UniProtKB/TrEMBL;Acc:A0A178UW98]	down
AT4G04750		Major facilitator superfamily protein [Source:TAIR;Acc:AT4G04750]	down
AT2G30520	RPT2	Root phototropism protein 2 [Source:UniProtKB/Swiss-Prot;Acc:Q682S0]	down
AT5G17460		Glutamyl-tRNA (Gln) amidotransferase subunit C [Source:UniProtKB/TrEMBL;Acc:Q949X1]	down
AT1G45474	LHCA5	Photosystem I chlorophyll a/b-binding protein 5, chloroplastic [Source:UniProtKB/Swiss-Prot;Acc:Q9C639]	down
AT4G28025		Uncharacterized protein At4g28025 [Source:UniProtKB/TrEMBL;Acc:Q9C5F3]	down
AT5G50100		Uncharacterized protein At5g50100, chloroplastic [Source:UniProtKB/Swiss-Prot;Acc:Q8W485]	down
AT1G01320		Tetratricopeptide repeat (TPR)-like superfamily protein [Source:UniProtKB/TrEMBL;Acc:F4HS99]	down
AT3G01480	CYP38	Peptidyl-prolyl cis-trans isomerase CYP38, chloroplastic [Source:UniProtKB/Swiss-Prot;Acc:Q9SSA5]	down
AT4G04840	MSRB6	MSRB6 [Source:UniProtKB/TrEMBL;Acc:A0A178V4R5]	down
AT1G24530		F21J9.19 [Source:UniProtKB/TrEMBL;Acc:Q9FYL1]	down
AT3G59120		Cysteine/Histidine-rich C1 domain family protein [Source:UniProtKB/TrEMBL;Acc:Q9LYS4]	down
AT1G80640		Probable receptor-like protein kinase At1g80640 [Source:UniProtKB/Swiss-Prot;Acc:Q0V7T5]	down
AT1G44446	CAO	CH1 [Source:UniProtKB/TrEMBL;Acc:A0A178W6L1]	down
AT4G27560	UGT79B2	UDP-glycosyltransferase 79B2 [Source:UniProtKB/Swiss-Prot;Acc:Q9T080]	down
AT3G54890	LHCA1	Chlorophyll a-b binding protein, chloroplastic [Source:UniProtKB/TrEMBL;Acc:A0A178VBT7]	down
AT1G73170		P-loop containing nucleoside triphosphate hydrolases superfamily protein [Source:TAIR;Acc:AT1G73170]	down
AT1G71720		F14O23.10 protein [Source:UniProtKB/TrEMBL;Acc:Q9M9H4]	down
AT4G00370	PHT4;4	Ascorbate transporter, chloroplastic [Source:UniProtKB/Swiss-Prot;Acc:Q8GX78]	down
AT3G06410		Zinc finger CCCH domain-containing protein 34 [Source:UniProtKB/Swiss-Prot;Acc:Q9SQU4]	down
AT2G47890	COL13	Zinc finger protein CONSTANS-LIKE 13 [Source:UniProtKB/Swiss-Prot;Acc:O82256]	down
AT5G66570	PSBO1	Oxygen-evolving enhancer protein 1-1, chloroplastic [Source:UniProtKB/Swiss-Prot;Acc:P23321]	down
AT3G56890		F-box associated ubiquitination effector family protein [Source:UniProtKB/TrEMBL;Acc:Q9LER9]	down
AT5G52960		At5g52960 [Source:UniProtKB/TrEMBL;Acc:Q9LVV6]	down
AT2G27820	ADT3	Arogenate dehydratase 3, chloroplastic [Source:UniProtKB/Swiss-Prot;Acc:Q9ZUY3]	down
AT5G18200		ADP-glucose phosphorylase [Source:UniProtKB/Swiss-Prot;Acc:Q9FK51]	down
AT3G49140		Uncharacterized protein At3g49140 [Source:UniProtKB/Swiss-Prot;Acc:Q0WMN5]	down
AT2G40150	TBL28	Protein trichome birefringence-like 28 [Source:UniProtKB/Swiss-Prot;Acc:Q94K00]	down
AT3G09540		Pectate lyase [Source:UniProtKB/TrEMBL;Acc:Q9SF49]	down
AT5G64120	PER71	Peroxidase [Source:UniProtKB/TrEMBL;Acc:A0A178UAR8]	down
AT5G15960	KIN1	Stress-induced protein KIN1 [Source:UniProtKB/Swiss-Prot;Acc:P18612]	down
AT1G76160	sks5	Sks5 [Source:UniProtKB/TrEMBL;Acc:A0A178WJJ9]	down
AT1G20225		Thioredoxin superfamily protein [Source:UniProtKB/TrEMBL;Acc:Q8W456]	down
AT5G16550		Voltage-dependent L-type calcium channel subunit [Source:UniProtKB/TrEMBL;Acc:Q9FFC9]	down
AT1G31330	PSAF	Photosystem I reaction center subunit III, chloroplastic [Source:UniProtKB/Swiss-Prot;Acc:Q9SHE8]	down
AT1G13640	PI4KG6	Phosphatidylinositol 4-kinase gamma 6 [Source:UniProtKB/Swiss-Prot;Acc:Q8W4R8]	down
AT5G05260	CYP79A2	Phenylalanine N-monooxygenase [Source:UniProtKB/Swiss-Prot;Acc:Q9FLC8]	down
AT2G36270	ABI5	Basic-leucine zipper (bZIP) transcription factor family protein [Source:TAIR;Acc:AT2G36270]	down
AT2G22240	IPS2	Inositol-3-phosphate synthase isozyme 2 [Source:UniProtKB/Swiss-Prot;Acc:Q38862]	down
AT3G63520	CCD1	Carotenoid 9,10(9',10')-cleavage dioxygenase 1 [Source:UniProtKB/Swiss-Prot;Acc:O65572]	down
AT3G54990	SMZ	AP2-like ethylene-responsive transcription factor SMZ [Source:UniProtKB/Swiss-Prot;Acc:Q6PV68]	down
AT4G25640	ATDTX35	Protein DETOXIFICATION [Source:UniProtKB/TrEMBL;Acc:F4JTB2]	down
AT1G69310	WRKY57	At1g69310 [Source:UniProtKB/TrEMBL;Acc:Q147N6]	down
AT1G73990	SPPA	Serine protease SPPA, chloroplastic [Source:UniProtKB/Swiss-Prot;Acc:Q9C9C0]	down
AT4G31390	ABC1K1	AtACDO1 [Source:UniProtKB/TrEMBL;Acc:A0A178V5V0]	down
AT1G70710	CEL1	Endoglucanase 8 [Source:UniProtKB/Swiss-Prot;Acc:Q9CAC1]	down
AT4G33660		Adhesive/proline-rich-like protein [Source:UniProtKB/TrEMBL;Acc:Q8LG30]	down
AT5G19940	PAP8	Probable plastid-lipid-associated protein 8, chloroplastic [Source:UniProtKB/Swiss-Prot;Acc:Q941D3]	down
AT5G01530	LHCB4.1	Chlorophyll a-b binding protein CP29.1, chloroplastic [Source:UniProtKB/Swiss-Prot;Acc:Q07473]	down
AT5G47110	LIL3.2	Light-harvesting complex-like protein 3 isotype 2, chloroplastic [Source:UniProtKB/Swiss-Prot;Acc:Q6NKS4]	down
AT5G38520		Alpha/beta-Hydrolases superfamily protein [Source:UniProtKB/TrEMBL;Acc:F4KBJ3]	down
AT1G03630	PORC	Protochlorophyllide reductase C, chloroplastic [Source:UniProtKB/Swiss-Prot;Acc:O48741]	down
AT1G12240	BFRUCT4	Acid beta-fructofuranosidase 4, vacuolar [Source:UniProtKB/Swiss-Prot;Acc:Q39041]	down
AT1G29070	RPL34	50S ribosomal protein L34, chloroplastic [Source:UniProtKB/Swiss-Prot;Acc:Q9LP37]	down
AT3G61470	LHCA2	Photosystem I chlorophyll a/b-binding protein 2, chloroplastic [Source:UniProtKB/Swiss-Prot;Acc:Q9SYW8]	down
AT4G15630		CASP-like protein 1E1 [Source:UniProtKB/Swiss-Prot;Acc:Q8L8Z1]	down
AT3G26300	CYP71B34	Cytochrome P450 71B34 [Source:UniProtKB/Swiss-Prot;Acc:Q9LIP6]	down
AT1G70000		At1g70000 [Source:UniProtKB/TrEMBL;Acc:O04544]	down
AT2G29450	GSTU5	GSTU5 [Source:UniProtKB/TrEMBL;Acc:A0A178VPP0]	down
AT1G67090	RBCS-1A	Ribulose bisphosphate carboxylase small chain [Source:UniProtKB/TrEMBL;Acc:A0A178WD57]	down
AT4G37310	CYP81H1	Cytochrome P450, family 81, subfamily H, polypeptide 1 [Source:UniProtKB/TrEMBL;Acc:Q9SW67]	down
AT3G50790		Esterase/lipase/thioesterase family protein [Source:UniProtKB/TrEMBL;Acc:Q9SVL9]	down
AT3G44200	NEK5	Serine/threonine-protein kinase Nek5 [Source:UniProtKB/Swiss-Prot;Acc:Q0WPH8]	down
AT1G64680		At1g64680 [Source:UniProtKB/TrEMBL;Acc:Q9SGU7]	down
AT2G40230		HXXXD-type acyl-transferase family protein [Source:UniProtKB/TrEMBL;Acc:Q9XEF2]	down
AT1G13250	GATL3	Probable galacturonosyltransferase-like 3 [Source:UniProtKB/Swiss-Prot;Acc:Q0V7R1]	down
AT1G13930		At1g13930/F16A14.27 [Source:UniProtKB/TrEMBL;Acc:Q9XI93]	down
AT1G72490		unknown protein; BEST Arabidopsis thaliana protein match is: unknown protein (TAIR:AT1G17400.1); Ha. [Source:TAIR;Acc:AT1G72490]	down
AT1G30380	PSAK	Photosystem I reaction center subunit psaK, chloroplastic [Source:UniProtKB/Swiss-Prot;Acc:Q9SUI5]	down
AT4G20820		Berberine bridge enzyme-like 18 [Source:UniProtKB/Swiss-Prot;Acc:Q9SVG5]	down
AT1G28570		GDSL esterase/lipase At1g28570 [Source:UniProtKB/Swiss-Prot;Acc:Q9FXJ1]	down
AT2G30570	PSBW	PSBW [Source:UniProtKB/TrEMBL;Acc:A0A178VQ32]	down
AT1G20620	CAT3	catalase 3 [Source:TAIR;Acc:AT1G20620]	down
AT5G64940	ATATH13	Protein ACTIVITY OF BC1 COMPLEX KINASE 8, chloroplastic [Source:UniProtKB/Swiss-Prot;Acc:Q93Y08]	down
AT2G35940	BLH1	BEL1-like homeodomain protein 1 [Source:UniProtKB/Swiss-Prot;Acc:Q9SJ56]	down
AT5G65470	OFUT39	O-fucosyltransferase 39 [Source:UniProtKB/Swiss-Prot;Acc:Q0WUZ5]	down
AT5G56760	SAT5	Serine acetyltransferase 5 [Source:UniProtKB/Swiss-Prot;Acc:Q42538]	down
AT2G40100	LHCB4.3	Chlorophyll a-b binding protein, chloroplastic [Source:UniProtKB/TrEMBL;Acc:A0A178VTY4]	down
AT3G57020	SSL9	Protein STRICTOSIDINE SYNTHASE-LIKE 9 [Source:UniProtKB/Swiss-Prot;Acc:Q9M1J6]	down
AT1G75460		ATP-dependent protease La (LON) domain protein [Source:UniProtKB/TrEMBL;Acc:Q9FWT4]	down
AT1G69480	PHO1-H10	Phosphate transporter PHO1 homolog 10 [Source:UniProtKB/Swiss-Prot;Acc:Q6R8G0]	down
AT5G18660	DVR	Divinyl chlorophyllide a 8-vinyl-reductase, chloroplastic [Source:UniProtKB/Swiss-Prot;Acc:Q1H537]	down
AT4G11600	GPX6	Probable phospholipid hydroperoxide glutathione peroxidase 6, mitochondrial [Source:UniProtKB/Swiss-Prot;Acc:O48646]	down
AT1G22750		AT1G22750 protein [Source:UniProtKB/TrEMBL;Acc:O64379]	down
AT3G20820		Leucine-rich repeat (LRR) family protein [Source:UniProtKB/TrEMBL;Acc:Q9LT39]	down
AT5G25810	TINY	Tny [Source:UniProtKB/TrEMBL;Acc:A0A178URN2]	down
AT5G05270	CHI3	Probable chalcone--flavonone isomerase 3 [Source:UniProtKB/Swiss-Prot;Acc:Q8VZW3]	down
AT5G24850	CRYD	Cryptochrome DASH, chloroplastic/mitochondrial [Source:UniProtKB/Swiss-Prot;Acc:Q84KJ5]	down
AT2G46910	PAP10	Probable plastid-lipid-associated protein 10, chloroplastic [Source:UniProtKB/Swiss-Prot;Acc:Q8W4F1]	down
AT2G24020	STIC2	Nucleoid-associated protein At2g24020, chloroplastic [Source:UniProtKB/Swiss-Prot;Acc:O82230]	down
AT1G14700	PAP3	Purple acid phosphatase 3 [Source:UniProtKB/Swiss-Prot;Acc:Q8H129]	down
AT2G30950	VAR2	FtsH extracellular protease family [Source:TAIR;Acc:AT2G30950]	down
AT3G04000	ChlADR2	NADPH-dependent aldehyde reductase 2, chloroplastic [Source:UniProtKB/Swiss-Prot;Acc:Q9SQR2]	down
AT5G37550		At5g37550 [Source:UniProtKB/TrEMBL;Acc:Q9FGI2]	down
AT4G18010	IP5P2	Type I inositol polyphosphate 5-phosphatase 2 [Source:UniProtKB/Swiss-Prot;Acc:Q9FUR2]	down
AT3G13784	CWINV5	Beta-fructofuranosidase, insoluble isoenzyme CWINV5 [Source:UniProtKB/Swiss-Prot;Acc:Q9LIB9]	down
AT3G56940	CRD1	Magnesium-protoporphyrin IX monomethyl ester [oxidative] cyclase, chloroplastic [Source:UniProtKB/Swiss-Prot;Acc:Q9M591]	down
AT1G30840	PUP4	Probable purine permease 4 [Source:UniProtKB/Swiss-Prot;Acc:Q9SY29]	down
AT5G07990	CYP75B1	TT7 [Source:UniProtKB/TrEMBL;Acc:A0A178UNZ9]	down
AT4G37150	MES9	MES9 [Source:UniProtKB/TrEMBL;Acc:A0A178V387]	down
AT1G12740	CYP87A2	Cytochrome P450, family 87, subfamily A, polypeptide 2 [Source:UniProtKB/TrEMBL;Acc:Q9LN73]	down
AT1G11210		At1g11210/T28P6_5 [Source:UniProtKB/TrEMBL;Acc:Q9SXA7]	down
AT2G25450	GSL-OH	Probable 2-oxoacid dependent dioxygenase [Source:UniProtKB/Swiss-Prot;Acc:Q9SKK4]	down
AT2G36145		Expressed protein [Source:UniProtKB/TrEMBL;Acc:Q8VXY0]	down
AT4G32410	CESA1	Cellulose synthase A catalytic subunit 1 [UDP-forming] [Source:UniProtKB/Swiss-Prot;Acc:O48946]	down
AT1G17100		HBP1 [Source:UniProtKB/TrEMBL;Acc:A0A178W6J0]	down
AT5G22640	TIC100	Protein TIC 100 [Source:UniProtKB/Swiss-Prot;Acc:Q8LPR8]	down
AT5G08050		Wiskott-aldrich syndrome family protein, putative (DUF1118) [Source:UniProtKB/TrEMBL;Acc:Q9SD79]	down
AT1G01420	UGT72B3	UDP-glucosyl transferase 72B3 [Source:TAIR;Acc:AT1G01420]	down
AT4G02530		chloroplast thylakoid lumen protein [Source:TAIR;Acc:AT4G02530]	down
AT3G05800	BHLH150	Transcription factor bHLH150 [Source:UniProtKB/Swiss-Prot;Acc:Q9M9L6]	down
AT5G08710		RUG1 [Source:UniProtKB/TrEMBL;Acc:A0A178UAH3]	down
AT4G26850	VTC2	GDP-L-galactose phosphorylase 1 [Source:UniProtKB/Swiss-Prot;Acc:Q8RWE8]	down
AT5G09225		Transmembrane protein [Source:UniProtKB/TrEMBL;Acc:Q8GYQ7]	down
AT3G06470		F24P17.3 protein [Source:UniProtKB/TrEMBL;Acc:Q9SQV0]	down
AT1G57770		FAD/NAD(P)-binding oxidoreductase family protein [Source:UniProtKB/TrEMBL;Acc:Q9FVR9]	down
AT5G06220		LETM1-like protein [Source:UniProtKB/TrEMBL;Acc:F4K2D7]	down
AT4G30950	FAD6	SFD4 [Source:UniProtKB/TrEMBL;Acc:A0A178V0M7]	down
AT5G53580	PLR1	Pyridoxal reductase, chloroplastic [Source:UniProtKB/Swiss-Prot;Acc:Q56Y42]	down
AT1G77330		1-aminocyclopropane-1-carboxylate oxidase 5 [Source:UniProtKB/Swiss-Prot;Acc:Q0WPW4]	down
AT4G34610	BLH6	BEL1-like homeodomain protein 6 [Source:UniProtKB/Swiss-Prot;Acc:O65685]	down
AT2G33060	AtRLP27	Receptor like protein 27 [Source:UniProtKB/Swiss-Prot;Acc:F4IUU1]	down
AT3G09520	ATEXO70H4	Exocyst subunit Exo70 family protein [Source:UniProtKB/TrEMBL;Acc:Q9SF51]	down
AT1G10370	GSTU17	Glutathione S-transferase U17 [Source:UniProtKB/Swiss-Prot;Acc:Q9FUS8]	down
AT2G34620		Mitochondrial transcription termination factor family protein [Source:UniProtKB/TrEMBL;Acc:O64685]	down
AT4G12490		pEARLI1-like lipid transfer protein 2 [Source:UniProtKB/Swiss-Prot;Acc:Q9SU34]	down
AT5G54290	CcdA	Cytochrome c biogenesis protein family [Source:UniProtKB/TrEMBL;Acc:F4K0A8]	down
AT5G08640	FLS1	Flavonol synthase/flavanone 3-hydroxylase [Source:UniProtKB/Swiss-Prot;Acc:Q96330]	down
AT1G28580		GDSL esterase/lipase At1g28580 [Source:UniProtKB/Swiss-Prot;Acc:Q9FXJ2]	down
AT2G21970	2019-09-02	SEP2 [Source:UniProtKB/TrEMBL;Acc:A0A178VQ84]	down
AT4G28080	TSS	Protein TSS [Source:UniProtKB/Swiss-Prot;Acc:F4JKH6]	down
AT1G62780		Dimethylallyl, adenosine tRNA methylthiotransferase [Source:UniProtKB/TrEMBL;Acc:Q8VY70]	down
AT5G03190	CPUORF47	Peptide upstream protein [Source:UniProtKB/TrEMBL;Acc:A8MQH8]	down
AT5G52310	RD29A	Low-temperature-induced 78 kDa protein [Source:UniProtKB/Swiss-Prot;Acc:Q06738]	down
AT1G44000	SGRL	Protein STAY-GREEN LIKE, chloroplastic [Source:UniProtKB/Swiss-Prot;Acc:Q94AQ9]	down
AT5G04830		Nuclear transport factor 2 (NTF2) family protein [Source:UniProtKB/TrEMBL;Acc:Q9FMC7]	down
AT4G39100	SHL	SHL1 [Source:UniProtKB/TrEMBL;Acc:A0A178UWF3]	down
AT3G15090		AT3g15090/K15M2_24 [Source:UniProtKB/TrEMBL;Acc:Q9LK96]	down
AT2G34490	CYP710A2	Cytochrome P450 710A2 [Source:UniProtKB/Swiss-Prot;Acc:O64698]	down
AT4G39730	PLAT1	PLAT1 [Source:UniProtKB/TrEMBL;Acc:A0A178V098]	down
AT3G12930	IJ	Protein Iojap, chloroplastic [Source:UniProtKB/Swiss-Prot;Acc:Q9LDY9]	down
AT3G23700		AT3g23700/MYM9_3 [Source:UniProtKB/TrEMBL;Acc:Q9LK47]	down
AT5G64550		Emb [Source:UniProtKB/TrEMBL;Acc:Q9FLG3]	down
AT5G39410		Probable mitochondrial saccharopine dehydrogenase-like oxidoreductase At5g39410 [Source:UniProtKB/Swiss-Prot;Acc:Q8LGI2]	down
AT4G28660	PSB28	Photosystem II reaction center Psb28 protein [Source:UniProtKB/TrEMBL;Acc:F4JM05]	down
AT1G55670	PSAG	Photosystem I reaction center subunit V, chloroplastic [Source:UniProtKB/Swiss-Prot;Acc:Q9S7N7]	down
AT1G47530	DTX33	Protein DETOXIFICATION 33 [Source:UniProtKB/Swiss-Prot;Acc:Q9SX83]	down
AT3G46610		Pentatricopeptide repeat-containing protein At3g46610 [Source:UniProtKB/Swiss-Prot;Acc:Q9SNB7]	down
AT1G19720	DYW7	Pentatricopeptide repeat-containing protein At1g19720 [Source:UniProtKB/Swiss-Prot;Acc:Q9FXH1]	down
AT3G57540	REM4.1	Remorin 4.1 [Source:UniProtKB/Swiss-Prot;Acc:Q93YN8]	down
AT1G30130		AT1G30130 protein [Source:UniProtKB/TrEMBL;Acc:Q9C6Z4]	down
AT1G68520	COL6	Zinc finger protein CONSTANS-LIKE 6 [Source:UniProtKB/Swiss-Prot;Acc:Q8LG76]	down
AT1G02813		Protein of unknown function, DUF538 [Source:TAIR;Acc:AT1G02813]	down
AT1G10090		Hyperosmolality-gated Ca2+ permeable channel 2.2 [Source:UniProtKB/TrEMBL;Acc:A0A097NUS5]	down
AT3G50820	PSBO2	Oxygen-evolving enhancer protein 1-2, chloroplastic [Source:UniProtKB/Swiss-Prot;Acc:Q9S841]	down
AT1G74670	GASA6	Gibberellin-regulated protein 6 [Source:UniProtKB/Swiss-Prot;Acc:Q6NMQ7]	down
AT5G57180	CIA2	CIA2 [Source:UniProtKB/TrEMBL;Acc:A0A178UDY1]	down
AT1G04420		NAD(P)-linked oxidoreductase superfamily protein [Source:UniProtKB/TrEMBL;Acc:Q8VZ23]	down
AT5G44110	ABCI21	ABC transporter I family member 21 [Source:UniProtKB/Swiss-Prot;Acc:Q9XF19]	down
AT1G30360	ERD4	Hyperosmolality-gated Ca2+ permeable channel 3.1 [Source:UniProtKB/TrEMBL;Acc:A0A097NUQ9]	down
AT1G31800	CYP97A3	Protein LUTEIN DEFICIENT 5, chloroplastic [Source:UniProtKB/Swiss-Prot;Acc:Q93VK5]	down
AT3G15354	SPA3	Protein SPA1-RELATED 3 [Source:UniProtKB/Swiss-Prot;Acc:Q9LJR3]	down
AT2G37240		Thioredoxin-like protein AAED1, chloroplastic [Source:UniProtKB/Swiss-Prot;Acc:Q9ZUU2]	down
AT4G35250		HCF244 [Source:UniProtKB/TrEMBL;Acc:A0A178UXV2]	down
AT5G34850	PAP26	Purple acid phosphatase [Source:UniProtKB/TrEMBL;Acc:A0A178UD94]	down
AT5G13630	CHLH	Magnesium-chelatase subunit ChlH, chloroplastic [Source:UniProtKB/Swiss-Prot;Acc:Q9FNB0]	down
AT3G19170	PREP1	Presequence protease 1, chloroplastic/mitochondrial [Source:UniProtKB/Swiss-Prot;Acc:Q9LJL3]	down
AT4G28740		FUNCTIONS IN: molecular_function unknown; INVOLVED IN: biological_process unknown; LOCATED IN: chloroplast; EXPRESSED IN: 21 plant structures; EXPRESSED DURING: 13 growth stages; CONTAINS InterPro DOMAIN/s: Protein of unknown function DUF3493 (Inter /.../R021883); BEST Arabidopsis thaliana protein match is: tetratricopeptide repeat (TPR)-containing protein (TAIR:AT1G02910.1); Ha. [Source:TAIR;Acc…	down
AT1G04990		Zinc finger CCCH domain-containing protein 3 [Source:UniProtKB/Swiss-Prot;Acc:Q94AD9]	down
AT1G10360	GSTU18	Glutathione S-transferase U18 [Source:UniProtKB/Swiss-Prot;Acc:Q9FUS9]	down
AT5G24930	COL4	Zinc finger protein CONSTANS-LIKE 4 [Source:UniProtKB/Swiss-Prot;Acc:Q940T9]	down
AT1G02340	HFR1	Transcription factor HFR1 [Source:UniProtKB/Swiss-Prot;Acc:Q9FE22]	down
AT3G44450	BIC2	Protein BIC2 [Source:UniProtKB/Swiss-Prot;Acc:Q9M280]	down
AT1G16720	HCF173	high chlorophyll fluorescence phenotype 173 [Source:TAIR;Acc:AT1G16720]	down
AT4G04640	ATPC1	ATP synthase gamma chain 1, chloroplastic [Source:UniProtKB/Swiss-Prot;Acc:Q01908]	down
AT4G25450	ABCB28	ABC transporter B family member 28 [Source:UniProtKB/Swiss-Prot;Acc:Q8LPQ6]	down
AT4G22240	PAP2	Probable plastid-lipid-associated protein 2, chloroplastic [Source:UniProtKB/Swiss-Prot;Acc:O49629]	down
AT5G02270	ATNAP9	Non-intrinsic ABC protein 9 [Source:UniProtKB/TrEMBL;Acc:F4KCB8]	down
AT4G33110		S-adenosyl-L-methionine-dependent methyltransferases superfamily protein [Source:UniProtKB/TrEMBL;Acc:Q8L788]	down
AT1G12800		Nucleic acid-binding, OB-fold-like protein [Source:UniProtKB/TrEMBL;Acc:Q94AJ9]	down
AT3G14690	CYP72A15	Cytochrome P450, family 72, subfamily A, polypeptide 15 [Source:UniProtKB/TrEMBL;Acc:A0A1I9LLM3]	down
AT2G16365		F-box protein At2g16365 [Source:UniProtKB/Swiss-Prot;Acc:Q84V03]	down
AT1G33560	ADR1	Disease resistance protein ADR1 [Source:UniProtKB/Swiss-Prot;Acc:Q9FW44]	down
AT3G52370	FLA15	FASCICLIN-like arabinogalactan protein 15 [Source:UniProtKB/TrEMBL;Acc:A0A1I9LLN6]	down
AT5G64840	ABCF5	GCN5 [Source:UniProtKB/TrEMBL;Acc:A0A178UAA3]	down
AT1G11330		G-type lectin S-receptor-like serine/threonine-protein kinase At1g11330 [Source:UniProtKB/Swiss-Prot;Acc:Q9SXB8]	down
AT2G25530		AFG1-like ATPase family protein [Source:UniProtKB/TrEMBL;Acc:Q9SKJ6]	down
AT1G06645		2-oxoglutarate (2OG) and Fe(II)-dependent oxygenase superfamily protein [Source:TAIR;Acc:AT1G06645]	down
AT1G42550	PMI1	Protein PLASTID MOVEMENT IMPAIRED 1 [Source:UniProtKB/Swiss-Prot;Acc:Q9C8E6]	down
AT5G13770		Pentatricopeptide repeat-containing protein At5g13770, chloroplastic [Source:UniProtKB/Swiss-Prot;Acc:Q66GP4]	down
AT1G27480	LCAT1	Lecithin-cholesterol acyltransferase-like 1 [Source:UniProtKB/Swiss-Prot;Acc:Q9FZI8]	down
AT1G29930	LHCB1.3	Chlorophyll a-b binding protein 1, chloroplastic [Source:UniProtKB/Swiss-Prot;Acc:P04778]	down
AT1G10760	GWD1	Alpha-glucan water dikinase 1, chloroplastic [Source:UniProtKB/Swiss-Prot;Acc:Q9SAC6]	down
AT5G24120	SIGE	RNA polymerase sigma factor sigE, chloroplastic/mitochondrial [Source:UniProtKB/Swiss-Prot;Acc:Q9ZNX9]	down
AT3G19450	CAD4	Cinnamyl alcohol dehydrogenase 4 [Source:UniProtKB/Swiss-Prot;Acc:P48523]	down
AT5G67480	BT4	BTB and TAZ domain protein 4 [Source:TAIR;Acc:AT5G67480]	down
AT2G25930	ELF3	Protein EARLY FLOWERING 3 [Source:UniProtKB/Swiss-Prot;Acc:O82804]	down
AT3G19800		Large ribosomal RNA subunit accumulation protein YCED homolog 2, chloroplastic [Source:UniProtKB/Swiss-Prot;Acc:Q9C5M1]	down
AT5G58770		Dehydrodolichyl diphosphate synthase 2 [Source:UniProtKB/Swiss-Prot;Acc:Q56Y11]	down
AT5G15910		NAD(P)-binding Rossmann-fold superfamily protein [Source:UniProtKB/TrEMBL;Acc:Q949S7]	down
AT2G45740	PEX11D	Peroxisomal membrane protein 11D [Source:UniProtKB/Swiss-Prot;Acc:O80845]	down
AT5G56860	GATA21	GATA transcription factor 21 [Source:UniProtKB/Swiss-Prot;Acc:Q5HZ36]	down
AT5G51820	PGMP	Phosphoglucomutase, chloroplastic [Source:UniProtKB/Swiss-Prot;Acc:Q9SCY0]	down
AT1G60950	FD2	Ferredoxin [Source:UniProtKB/TrEMBL;Acc:A0A178W2W5]	down
AT3G61460	BRH1	BRH1 RING finger protein [Source:UniProtKB/TrEMBL;Acc:Q9XF92]	down
AT4G34730		Probable ribosome-binding factor A, chloroplastic [Source:UniProtKB/Swiss-Prot;Acc:O65693]	down
AT3G15360	ATHM4	TRX-M4 [Source:UniProtKB/TrEMBL;Acc:A0A178VJ83]	down
AT5G63380	4CLL9	4-coumarate--CoA ligase-like 9 [Source:UniProtKB/Swiss-Prot;Acc:Q84P23]	down
AT1G78600	LZF1	Light-regulated zinc finger protein 1 [Source:UniProtKB/TrEMBL;Acc:F4IBS4]	down
AT4G29590		S-adenosyl-L-methionine-dependent methyltransferases superfamily protein [Source:UniProtKB/TrEMBL;Acc:Q9SU88]	down
AT1G54570		Acyltransferase-like protein At1g54570, chloroplastic [Source:UniProtKB/Swiss-Prot;Acc:Q9ZVN2]	down
AT1G69870	NPF2.13	Protein NRT1/ PTR FAMILY 2.13 [Source:UniProtKB/Swiss-Prot;Acc:Q8RX77]	down
AT2G44920		Thylakoid lumenal 15 kDa protein 1, chloroplastic [Source:UniProtKB/Swiss-Prot;Acc:O22160]	down
AT3G24190		AT3g24190/MUJ8_17 [Source:UniProtKB/TrEMBL;Acc:Q9LRN0]	down
AT4G39040		At4g39040 [Source:UniProtKB/TrEMBL;Acc:Q9SVI9]	down
AT1G78020	FLZ6	FCS-Like Zinc finger 6 [Source:UniProtKB/Swiss-Prot;Acc:Q9SGZ8]	down
AT2G36690		2-oxoglutarate (2OG) and Fe(II)-dependent oxygenase superfamily protein [Source:UniProtKB/TrEMBL;Acc:F4INZ9]	down
AT5G35970		P-loop containing nucleoside triphosphate hydrolases superfamily protein [Source:UniProtKB/TrEMBL;Acc:F4K1G7]	down
AT4G15490	UGT84A3	UDP-glycosyltransferase 84A3 [Source:UniProtKB/Swiss-Prot;Acc:O23401]	down
AT1G20440	COR47	RD17 [Source:UniProtKB/TrEMBL;Acc:A0A384KK16]	down
AT3G14067	SBT1.4	Subtilisin-like protease SBT1.4 [Source:UniProtKB/Swiss-Prot;Acc:Q9LVJ1]	down
AT2G41000		Chaperone DnaJ-domain superfamily protein [Source:UniProtKB/TrEMBL;Acc:B3H694]	down
AT2G34640	PTAC12	Protein PLASTID TRANSCRIPTIONALLY ACTIVE 12, chloroplastic [Source:UniProtKB/Swiss-Prot;Acc:F4IHY7]	down
AT2G39190	ATATH8	Protein kinase superfamily protein [Source:UniProtKB/TrEMBL;Acc:O80962]	down
AT2G36080	ARF31	B3 domain-containing protein At2g36080 [Source:UniProtKB/Swiss-Prot;Acc:Q8GYJ2]	down
AT1G67360		REF/SRPP-like protein At1g67360 [Source:UniProtKB/Swiss-Prot;Acc:Q9FYF7]	down
AT5G65165	SDH2-3	Succinate dehydrogenase [ubiquinone] iron-sulfur subunit 3, mitochondrial [Source:UniProtKB/Swiss-Prot;Acc:Q9FJP9]	down
AT3G04140		Ankyrin repeat family protein [Source:UniProtKB/TrEMBL;Acc:Q9M8X0]	down
AT1G12370	PHR1	Deoxyribodipyrimidine photo-lyase [Source:UniProtKB/Swiss-Prot;Acc:Q9SB00]	down
AT3G23810	SAHH2	Adenosylhomocysteinase [Source:UniProtKB/TrEMBL;Acc:A0A178VEP9]	down
AT1G20340	DRT112	Plastocyanin major isoform, chloroplastic [Source:UniProtKB/Swiss-Prot;Acc:P42699]	down
AT3G23030	IAA2	Auxin-responsive protein [Source:UniProtKB/TrEMBL;Acc:A0A1I9LQ54]	down
AT3G57030	SSL10	Protein STRICTOSIDINE SYNTHASE-LIKE 10 [Source:UniProtKB/Swiss-Prot;Acc:Q4V3D9]	down
AT4G35030		Protein kinase superfamily protein [Source:UniProtKB/TrEMBL;Acc:F4JM74]	down
AT1G32220		Uncharacterized protein At1g32220, chloroplastic [Source:UniProtKB/Swiss-Prot;Acc:Q9FVR6]	down
AT3G52610		GATA zinc finger protein [Source:UniProtKB/TrEMBL;Acc:Q8H1S5]	down
AT1G22740	RABG3B	Ras-related protein RABG3b [Source:UniProtKB/Swiss-Prot;Acc:O04157]	down
AT3G23400	PAP6	Plastid-lipid-associated protein 6, chloroplastic [Source:UniProtKB/Swiss-Prot;Acc:Q9LW57]	down
AT5G60120	TOE2	Target of early activation tagged (EAT) 2 [Source:UniProtKB/TrEMBL;Acc:F4JXG9]	down
AT3G17130		Plant invertase/pectin methylesterase inhibitor superfamily protein [Source:UniProtKB/TrEMBL;Acc:Q9LSN4]	down
AT2G25940	ALPHA-VPE	Vacuolar-processing enzyme alpha-isozyme [Source:UniProtKB/Swiss-Prot;Acc:P49047]	down
AT5G47610	ATL79	At5g47610 [Source:UniProtKB/TrEMBL;Acc:Q1H5E6]	down
AT1G10960	FD1	Ferredoxin-1, chloroplastic [Source:UniProtKB/Swiss-Prot;Acc:O04090]	down
AT1G64110		p-loop containing nucleoside triphosphate hydrolases superfamily protein [Source:UniProtKB/TrEMBL;Acc:F4I5A3]	down
AT4G18020	APRR2	Two-component response regulator-like APRR2 [Source:UniProtKB/Swiss-Prot;Acc:Q6LA43]	down
AT5G41460		At5g41460 [Source:UniProtKB/TrEMBL;Acc:Q9FN55]	down
AT3G18490	ASPG1	Protein ASPARTIC PROTEASE IN GUARD CELL 1 [Source:UniProtKB/Swiss-Prot;Acc:Q9LS40]	down
AT1G80300	AATP1	ADP,ATP carrier protein 1, chloroplastic [Source:UniProtKB/Swiss-Prot;Acc:Q39002]	down
AT4G20760		NAD(P)-binding Rossmann-fold superfamily protein [Source:TAIR;Acc:AT4G20760]	down
AT2G24190		NAD(P)-binding Rossmann-fold superfamily protein [Source:TAIR;Acc:AT2G24190]	down
AT4G08685	SAH7	SAH7 [Source:UniProtKB/TrEMBL;Acc:A0A178UVW6]	down
AT1G72030		Acyl-CoA N-acyltransferases (NAT) superfamily protein [Source:UniProtKB/TrEMBL;Acc:Q9C7G6]	down
AT3G54360	NCA1	Protein NCA1 [Source:UniProtKB/Swiss-Prot;Acc:Q9M2V1]	down
AT1G64500		F1N19.7 [Source:UniProtKB/TrEMBL;Acc:Q9SGW5]	down
AT3G27380	SDH2-1	Succinate dehydrogenase [ubiquinone] iron-sulfur subunit 1, mitochondrial [Source:UniProtKB/Swiss-Prot;Acc:Q8LBZ7]	down
AT2G20890	THF1	THF1 [Source:UniProtKB/TrEMBL;Acc:A0A178VVV5]	down
AT5G57785		At5g57785 [Source:UniProtKB/TrEMBL;Acc:Q8GY06]	down
AT1G44575	PSBS	Photosystem II 22 kDa protein, chloroplastic [Source:UniProtKB/Swiss-Prot;Acc:Q9XF91]	down
AT5G53370	ATPMEPCRF	pectin methylesterase PCR fragment F [Source:TAIR;Acc:AT5G53370]	down
AT5G11790	NDL2	Protein NDL2 [Source:UniProtKB/Swiss-Prot;Acc:Q9ASU8]	down
AT1G68500		Uncharacterized protein At1g68500 [Source:UniProtKB/TrEMBL;Acc:Q84K42]	down
AT1G78820		EP1-like glycoprotein 1 [Source:UniProtKB/Swiss-Prot;Acc:Q9ZVA1]	down
AT2G43560	FKBP16-3	Peptidylprolyl isomerase [Source:UniProtKB/TrEMBL;Acc:A0A178VVY6]	down
AT4G01150	CURT1A	Protein CURVATURE THYLAKOID 1A, chloroplastic [Source:UniProtKB/Swiss-Prot;Acc:O04616]	down
AT5G22740	CSLA2	Glycosyltransferase (Fragment) [Source:UniProtKB/TrEMBL;Acc:W8PUD8]	down
AT1G60270	BGLU6	Putative beta-glucosidase 6 [Source:UniProtKB/Swiss-Prot;Acc:Q682B4]	down
AT1G59700	GSTU16	Glutathione S-transferase U16 [Source:UniProtKB/Swiss-Prot;Acc:Q9XIF8]	down
AT2G03240	PHO1-H5	Phosphate transporter PHO1 homolog 5 [Source:UniProtKB/Swiss-Prot;Acc:Q6R8G5]	down
AT4G37780	MYB87	Transcription factor MYB87 [Source:UniProtKB/Swiss-Prot;Acc:F4JSU0]	down
AT3G21560	UGT84A2	UGT84A2 [Source:UniProtKB/TrEMBL;Acc:A0A384L2P1]	down
AT5G03555	NCS1	Purine-uracil permease NCS1 [Source:UniProtKB/Swiss-Prot;Acc:Q9LZD0]	down
AT3G21720	ICL	Isocitrate lyase [Source:UniProtKB/Swiss-Prot;Acc:P28297]	down
AT5G03940	FFC	SRP54CP [Source:UniProtKB/TrEMBL;Acc:A0A178UD49]	down
AT5G50920	CLPC1	Chaperone protein ClpC1, chloroplastic [Source:UniProtKB/Swiss-Prot;Acc:Q9FI56]	down
AT2G37220	CP29B	RNA-binding protein CP29B, chloroplastic [Source:UniProtKB/Swiss-Prot;Acc:Q9ZUU4]	down
AT5G21280		At5g21280 [Source:UniProtKB/TrEMBL;Acc:Q9C589]	down
AT5G23730	RUP2	WD repeat-containing protein RUP2 [Source:UniProtKB/Swiss-Prot;Acc:Q9FFA7]	down
AT5G13650		Elongation factor family protein [Source:UniProtKB/TrEMBL;Acc:F4K409]	down
AT4G34620	RPS16-1	SSR16 [Source:UniProtKB/TrEMBL;Acc:A0A178UZA3]	down
AT1G78070		At1g78070/F28K19_28 [Source:UniProtKB/TrEMBL;Acc:Q94JT6]	down
AT2G31560		AT2G31560 protein [Source:UniProtKB/TrEMBL;Acc:Q8VZ71]	down
AT1G33590		Leucine-rich repeat (LRR) family protein [Source:TAIR;Acc:AT1G33590]	down
AT5G10730		AT5g10730/MAJ23_90 [Source:UniProtKB/TrEMBL;Acc:Q93VH5]	down
AT4G02280	SUS3	Sucrose synthase (Fragment) [Source:UniProtKB/TrEMBL;Acc:W8Q6L8]	down
AT4G05100	AtMYB74	Transcription factor MYB74 [Source:UniProtKB/Swiss-Prot;Acc:Q9M0Y5]	down
AT4G04850	KEA3	K(+) efflux antiporter 3, chloroplastic [Source:UniProtKB/Swiss-Prot;Acc:Q9M0Z3]	down
AT3G57450		At3g57450 [Source:UniProtKB/TrEMBL;Acc:Q9SCM7]	up
AT1G73805	SARD1	Protein SAR DEFICIENT 1 [Source:UniProtKB/Swiss-Prot;Acc:Q9C9T2]	up
AT1G62380	ACO2	1-aminocyclopropane-1-carboxylate oxidase 2 [Source:UniProtKB/Swiss-Prot;Acc:Q41931]	up
AT5G45500		RNI-like superfamily protein [Source:UniProtKB/TrEMBL;Acc:Q9FHI6]	up
AT4G27280	KRP1	Calcium-binding protein KRP1 [Source:UniProtKB/Swiss-Prot;Acc:O81831]	up
AT1G66160	PUB20	U-box domain-containing protein 20 [Source:UniProtKB/Swiss-Prot;Acc:Q9C8D1]	up
AT1G05010	ACO4	1-aminocyclopropane-1-carboxylate oxidase 4 [Source:UniProtKB/Swiss-Prot;Acc:Q06588]	up
AT5G01750		Protein LURP-one-related 15 [Source:UniProtKB/Swiss-Prot;Acc:Q9LZX1]	up
AT1G68690	PERK9	Proline-rich receptor-like protein kinase PERK9 [Source:UniProtKB/Swiss-Prot;Acc:Q9SX31]	up
AT5G64250		2-nitropropane dioxygenase-like protein [Source:UniProtKB/TrEMBL;Acc:Q9FMG0]	up
AT3G28910	MYB30	Transcription factor MYB30 [Source:UniProtKB/Swiss-Prot;Acc:Q9SCU7]	up
AT2G44290	YLS3	Protein YLS3 [Source:UniProtKB/Swiss-Prot;Acc:O64864]	up
AT5G39580	PER62	Peroxidase 62 [Source:UniProtKB/Swiss-Prot;Acc:Q9FKA4]	up
AT2G05940	RIPK	Serine/threonine-protein kinase RIPK [Source:UniProtKB/Swiss-Prot;Acc:Q9ZUF4]	up
AT5G37490	PUB21	U-box domain-containing protein 21 [Source:UniProtKB/Swiss-Prot;Acc:Q5PNY6]	up
AT4G16820	PLA-I{beta]2	Phospholipase A1-Ibeta2, chloroplastic [Source:UniProtKB/Swiss-Prot;Acc:O23522]	up
AT1G67880		Beta-1,4-N-acetylglucosaminyltransferase family protein [Source:UniProtKB/TrEMBL;Acc:Q9C9V4]	up
AT1G12420	ACR8	ACT domain-containing protein ACR8 [Source:UniProtKB/Swiss-Prot;Acc:Q9LNA5]	up
AT1G55850	CSLE1	Cellulose synthase-like protein E1 [Source:UniProtKB/Swiss-Prot;Acc:Q8VZK9]	up
AT5G64750	ABR1	Ethylene-responsive transcription factor ABR1 [Source:UniProtKB/Swiss-Prot;Acc:Q9FGF8]	up
AT1G78000	SULTR1;2	Sulfate transporter 1.2 [Source:UniProtKB/Swiss-Prot;Acc:Q9MAX3]	up
AT5G53460	GLT1	Glutamate synthase 1 [NADH], chloroplastic [Source:UniProtKB/Swiss-Prot;Acc:Q9LV03]	up
AT1G64065		Late embryogenesis abundant protein At1g64065 [Source:UniProtKB/Swiss-Prot;Acc:Q6DST1]	up
AT1G01680	PUB54	U-box domain-containing protein 54 [Source:UniProtKB/Swiss-Prot;Acc:Q9LQ92]	up
AT5G65300		Uncharacterized protein At5g65300 [Source:UniProtKB/TrEMBL;Acc:Q9FKQ7]	up
AT1G70420		At1g70420/F17O7_4 [Source:UniProtKB/TrEMBL;Acc:O64594]	up
AT2G43700	LECRK54	L-type lectin-domain containing receptor kinase V.4 [Source:UniProtKB/Swiss-Prot;Acc:O22833]	up
AT3G14940	PPC3	Phosphoenolpyruvate carboxylase 3 [Source:UniProtKB/Swiss-Prot;Acc:Q84VW9]	up
AT1G07000	ATEXO70B2	Exocyst subunit Exo70 family protein [Source:UniProtKB/TrEMBL;Acc:A0A178WCB5]	up
AT5G57510		Cotton fiber protein [Source:UniProtKB/TrEMBL;Acc:Q9FKM0]	up
AT1G75450	CKX5	Cytokinin dehydrogenase 5 [Source:UniProtKB/Swiss-Prot;Acc:Q67YU0]	up
AT2G37430	ZAT11	ZAT11 [Source:UniProtKB/TrEMBL;Acc:A0A178VNJ8]	up
AT3G60540		Protein transport protein Sec61 subunit beta [Source:UniProtKB/TrEMBL;Acc:Q9M206]	up
AT4G22530		S-adenosyl-L-methionine-dependent methyltransferases superfamily protein [Source:UniProtKB/TrEMBL;Acc:Q9SUW6]	up
AT3G25882	NIMIN-2	NIMIN-2 [Source:UniProtKB/TrEMBL;Acc:A0A178VAB1]	up
AT5G14310	CXE16	CXE16 [Source:UniProtKB/TrEMBL;Acc:A0A178UL11]	up
AT5G59930		Cysteine/Histidine-rich C1 domain family protein [Source:UniProtKB/TrEMBL;Acc:Q9FJE3]	up
AT5G67430		Acyl-CoA N-acyltransferases (NAT) superfamily protein [Source:UniProtKB/TrEMBL;Acc:Q9FN10]	up
AT3G08760	ATSIK	ATSIK [Source:UniProtKB/TrEMBL;Acc:A0A384KX76]	up
AT1G09080	MED37B	Probable mediator of RNA polymerase II transcription subunit 37b [Source:UniProtKB/Swiss-Prot;Acc:Q8H1B3]	up
AT2G23770	LYK4	LysM domain receptor-like kinase 4 [Source:UniProtKB/Swiss-Prot;Acc:O64825]	up
AT2G39210		At2g39210/T16B24.15 [Source:UniProtKB/TrEMBL;Acc:O80960]	up
AT1G24150	ATFH4	formin homologue 4 [Source:TAIR;Acc:AT1G24150]	up
AT2G30550		Phospholipase A1-Igamma2, chloroplastic [Source:UniProtKB/Swiss-Prot;Acc:Q3EBR6]	up
AT1G42990	BZIP60	bZIP transcription factor 60 [Source:UniProtKB/Swiss-Prot;Acc:Q9C7S0]	up
AT1G16260	WAKL8	Wall-associated receptor kinase-like 8 [Source:UniProtKB/Swiss-Prot;Acc:Q9SA25]	up
AT5G39610	NAC92	NAC domain-containing protein 92 [Source:UniProtKB/Swiss-Prot;Acc:Q9FKA0]	up
AT4G19230	CYP707A1	Cytochrome P450, family 707, subfamily A, polypeptide 1 [Source:UniProtKB/TrEMBL;Acc:A8MRX5]	up
AT5G02230		Haloacid dehalogenase-like hydrolase (HAD) superfamily protein [Source:TAIR;Acc:AT5G02230]	up
AT5G09800	PUB28	U-box domain-containing protein 28 [Source:UniProtKB/Swiss-Prot;Acc:Q9LXE3]	up
AT4G16260		Probable glucan endo-1,3-beta-glucosidase At4g16260 [Source:UniProtKB/Swiss-Prot;Acc:Q8VZJ2]	up
AT5G48540	CRRSP55	Cysteine-rich repeat secretory protein 55 [Source:UniProtKB/Swiss-Prot;Acc:Q9LV60]	up
AT3G59570		Ypt/Rab-GAP domain of gyp1p superfamily protein [Source:UniProtKB/TrEMBL;Acc:A0A1I9LM99]	up
AT5G45110	NPR3	NPR3 [Source:UniProtKB/TrEMBL;Acc:A0A178UGU4]	up
AT3G09010		Protein kinase superfamily protein [Source:UniProtKB/TrEMBL;Acc:Q8LF75]	up
AT2G39400		Alpha/beta-Hydrolases superfamily protein [Source:UniProtKB/TrEMBL;Acc:O80627]	up
AT2G15390	FUT4	Probable fucosyltransferase 4 [Source:UniProtKB/Swiss-Prot;Acc:Q9SJP2]	up
AT3G25600	CML16	Probable calcium-binding protein CML16 [Source:UniProtKB/Swiss-Prot;Acc:Q9LI84]	up
AT3G23730	XTH16	Probable xyloglucan endotransglucosylase/hydrolase protein 16 [Source:UniProtKB/Swiss-Prot;Acc:Q8LG58]	up
AT2G43590		Endochitinase At2g43590 [Source:UniProtKB/Swiss-Prot;Acc:O24658]	up
AT5G41410	BEL1	Homeobox protein BEL1 homolog [Source:UniProtKB/Swiss-Prot;Acc:Q38897]	up
AT1G54120		F15I1.22 [Source:UniProtKB/TrEMBL;Acc:Q9SYH0]	up
AT1G53700	WAG1	Serine/threonine-protein kinase WAG1 [Source:UniProtKB/Swiss-Prot;Acc:Q9C8M5]	up
AT1G78850		EP1-like glycoprotein 3 [Source:UniProtKB/Swiss-Prot;Acc:Q9ZVA4]	up
AT3G19010		2-oxoglutarate (2OG) and Fe(II)-dependent oxygenase superfamily protein [Source:UniProtKB/TrEMBL;Acc:Q9LJ65]	up
AT2G40260		Homeodomain-like superfamily protein [Source:UniProtKB/TrEMBL;Acc:Q9SIZ5]	up
AT3G15990	SULTR3;4	Probable sulfate transporter 3.4 [Source:UniProtKB/Swiss-Prot;Acc:Q9LW86]	up
AT3G15030	TCP4	TCP4 [Source:UniProtKB/TrEMBL;Acc:A0A384KY84]	up
AT2G45760	BAP2	BON1-associated protein 2 [Source:UniProtKB/Swiss-Prot;Acc:Q58FX0]	up
AT1G72450	TIFY11B	TIFY11B [Source:UniProtKB/TrEMBL;Acc:A0A178W2J3]	up
AT3G16800		Probable protein phosphatase 2C 41 [Source:UniProtKB/Swiss-Prot;Acc:Q9LRZ4]	up
AT5G26920	CBP60G	Calmodulin-binding protein 60 G [Source:UniProtKB/Swiss-Prot;Acc:F4K2R6]	up
AT4G17500	ERF1A	Ethylene-responsive transcription factor 1A [Source:UniProtKB/Swiss-Prot;Acc:O80337]	up
AT4G18880	HSFA4A	HSF A4A [Source:UniProtKB/TrEMBL;Acc:A0A178UUP9]	up
AT1G12990		Beta-1,4-N-acetylglucosaminyltransferase family protein [Source:UniProtKB/TrEMBL;Acc:F4HP06]	up
AT5G06090	GPAT7	GPAT7 [Source:UniProtKB/TrEMBL;Acc:A0A178URK3]	up
AT5G57010	IQM5	IQ domain-containing protein IQM5 [Source:UniProtKB/Swiss-Prot;Acc:Q058N0]	up
AT1G35210		Uncharacterized protein T32G9.25 [Source:UniProtKB/TrEMBL;Acc:Q9C6F2]	up
AT1G70690	CRRSP2	PDLP5 [Source:UniProtKB/TrEMBL;Acc:A0A178WPB2]	up
AT5G67140		F-box protein At5g67140 [Source:UniProtKB/Swiss-Prot;Acc:Q9FH99]	up
AT3G62590	PLIP3	Phospholipase A1 PLIP3, chloroplastic [Source:UniProtKB/Swiss-Prot;Acc:Q940L4]	up
AT2G32190		Cysteine-rich/transmembrane domain A-like protein [Source:UniProtKB/TrEMBL;Acc:Q9SKY1]	up
AT2G40610	EXPA8	Expansin-A8 [Source:UniProtKB/Swiss-Prot;Acc:O22874]	up
AT2G25460		CONTAINS InterPro DOMAIN/s: C2 calcium-dependent membrane targeting (InterPro:IPR000008); BEST Arabidopsis thaliana protein match is: unknown protein (TAIR:AT5G04860.1); Ha. [Source:TAIR;Acc:AT2G25460]	up
AT4G22590	TPPG	Trehalose 6-phosphate phosphatase [Source:UniProtKB/TrEMBL;Acc:A0A178UWC3]	up
AT3G18290	BTS	Zinc finger protein BRUTUS [Source:UniProtKB/Swiss-Prot;Acc:Q8LPQ5]	up
AT5G08790	NAC081	Protein ATAF2 [Source:UniProtKB/Swiss-Prot;Acc:Q9C598]	up
AT5G06320	NHL3	NHL3 [Source:UniProtKB/TrEMBL;Acc:A0A178UB58]	up
AT4G23810	WRKY53	Probable WRKY transcription factor 53 [Source:UniProtKB/Swiss-Prot;Acc:Q9SUP6]	up
AT1G18570	MYB51	Transcription factor MYB51 [Source:UniProtKB/Swiss-Prot;Acc:O49782]	up
AT5G49665	WAV3	E3 ubiquitin-protein ligase WAV3 [Source:UniProtKB/Swiss-Prot;Acc:Q9LTA6]	up
AT4G37390	YDK1	Auxin-responsive GH3 family protein [Source:TAIR;Acc:AT4G37390]	up
AT1G76650	CML38	CML38 [Source:UniProtKB/TrEMBL;Acc:A0A178WMC5]	up
AT1G61840		Cysteine/Histidine-rich C1 domain family protein [Source:UniProtKB/TrEMBL;Acc:O80692]	up
AT5G64660	PUB27	U-box domain-containing protein 27 [Source:UniProtKB/Swiss-Prot;Acc:Q9FLF4]	up
AT4G36820		Calcium uniporter protein 1, mitochondrial [Source:UniProtKB/Swiss-Prot;Acc:Q1PE15]	up
AT5G48850	SDI1	ATSDI1 [Source:UniProtKB/TrEMBL;Acc:A0A178UKA2]	up
AT1G76090	SMT3	24-methylenesterol C-methyltransferase 3 [Source:UniProtKB/Swiss-Prot;Acc:Q94JS4]	up
AT1G67970	HSFA8	Heat stress transcription factor A-8 [Source:UniProtKB/Swiss-Prot;Acc:Q9S7U5]	up
AT3G07570		Cytochrome b561 and DOMON domain-containing protein At3g07570 [Source:UniProtKB/Swiss-Prot;Acc:Q0WRW8]	up
AT5G06980		unknown protein; BEST Arabidopsis thaliana protein match is: unknown protein (TAIR:AT3G12320.1); Ha. [Source:TAIR;Acc:AT5G06980]	up
AT2G24180	CYP71B6	Cytochrome P450 71B6 [Source:UniProtKB/Swiss-Prot;Acc:O65787]	up
AT3G49570	LSU3	Protein RESPONSE TO LOW SULFUR 3 [Source:UniProtKB/Swiss-Prot;Acc:Q9SCK2]	up
AT4G05020	NDB2	NAD(P)H dehydrogenase B2 [Source:UniProtKB/TrEMBL;Acc:F4JGL5]	up
AT3G15300	VQ19	VQ motif-containing protein 19 [Source:UniProtKB/Swiss-Prot;Acc:Q9LDZ1]	up
AT5G17330	GAD1	Glutamate decarboxylase 1 [Source:UniProtKB/Swiss-Prot;Acc:Q42521]	up
AT1G18870	ICS2	Isochorismate synthase 2, chloroplastic [Source:UniProtKB/Swiss-Prot;Acc:Q9M9V6]	up
AT1G01380	ETC1	MYB-like transcription factor ETC1 [Source:UniProtKB/Swiss-Prot;Acc:Q9LNI5]	up
AT2G14210	ANR1	AGAMOUS-like 44 [Source:TAIR;Acc:AT2G14210]	up
AT1G14780		MACPF domain-containing protein At1g14780 [Source:UniProtKB/Swiss-Prot;Acc:Q8L612]	up
AT1G70740		At1g70740 [Source:UniProtKB/TrEMBL;Acc:B4F7N6]	up
AT2G43570	CHI	CHI [Source:UniProtKB/TrEMBL;Acc:A0A178W3M3]	up
AT1G14540	PER4	Peroxidase [Source:UniProtKB/TrEMBL;Acc:A0A178WND9]	up
AT2G23760	BLH4	BEL1-like homeodomain 4 [Source:TAIR;Acc:AT2G23760]	up
AT3G12700	NANA	Aspartic proteinase NANA, chloroplast [Source:UniProtKB/Swiss-Prot;Acc:Q9LTW4]	up
AT1G24140	3MMP	Metalloendoproteinase 3-MMP [Source:UniProtKB/Swiss-Prot;Acc:Q5XF51]	up
AT1G07135		At1g07135 [Source:UniProtKB/TrEMBL;Acc:Q9LMK6]	up
AT1G17615		Disease resistance protein (TIR-NBS class) [Source:UniProtKB/TrEMBL;Acc:Q4PT31]	up
AT3G50280		Uncharacterized acetyltransferase At3g50280 [Source:UniProtKB/Swiss-Prot;Acc:Q9SND9]	up
AT1G30620	MUR4	UXE1 [Source:UniProtKB/TrEMBL;Acc:A0A384K925]	up
AT1G62480		At1g62480/T3P18_4 [Source:UniProtKB/TrEMBL;Acc:Q9SXE9]	up
AT2G27690	CYP94C1	Cytochrome P450 94C1 [Source:UniProtKB/Swiss-Prot;Acc:Q9ZUX1]	up
AT5G06230	TBL9	Protein trichome birefringence-like 9 [Source:UniProtKB/Swiss-Prot;Acc:Q9FFZ4]	up
AT3G52400	SYP122	Syntaxin-122 [Source:UniProtKB/Swiss-Prot;Acc:Q9SVC2]	up
AT2G38180		GDSL esterase/lipase At2g38180 [Source:UniProtKB/Swiss-Prot;Acc:O80443]	up
AT2G37470		Histone H2B.4 [Source:UniProtKB/Swiss-Prot;Acc:Q9ZUS0]	up
AT3G25250	OXI1	Serine/threonine-protein kinase OXI1 [Source:UniProtKB/Swiss-Prot;Acc:Q9LSF1]	up
AT5G64810	WRKY51	Probable WRKY transcription factor 51 [Source:UniProtKB/Swiss-Prot;Acc:Q93WU9]	up
AT1G28660		GDSL esterase/lipase At1g28660 [Source:UniProtKB/Swiss-Prot;Acc:Q9FPE4]	up
AT3G16510		At3g16510 [Source:UniProtKB/TrEMBL;Acc:Q9LK74]	up
AT5G01550	LECRKA4.2	lectin receptor kinase a4.1 [Source:TAIR;Acc:AT5G01550]	up
AT2G41100	CML12	Calmodulin-like protein 12 [Source:UniProtKB/Swiss-Prot;Acc:P25071]	up
AT4G35110		Phospholipase-like protein (PEARLI 4) family protein [Source:UniProtKB/TrEMBL;Acc:A8MQE1]	up
AT3G12240	SCPL15	Serine carboxypeptidase-like 15 [Source:UniProtKB/Swiss-Prot;Acc:Q9C7D2]	up
AT2G44300		At2g44300 [Source:UniProtKB/TrEMBL;Acc:O64865]	up
AT3G10300		Calcium-binding EF-hand family protein [Source:UniProtKB/TrEMBL;Acc:A0A1I9LRS6]	up
AT3G51920	CML9	Calmodulin-like protein 9 [Source:UniProtKB/Swiss-Prot;Acc:Q9S744]	up
AT3G04070	NAC047	NAC transcription factor 47 [Source:UniProtKB/Swiss-Prot;Acc:Q84TD6]	up
AT1G72280	AERO1	Like disulfide bond formation protein [Source:UniProtKB/TrEMBL;Acc:Q0WSW0]	up
AT3G56400	WRKY70	Probable WRKY transcription factor 70 [Source:UniProtKB/Swiss-Prot;Acc:Q9LY00]	up
AT4G11840	PLDGAMMA3	Phospholipase D gamma 3 [Source:UniProtKB/Swiss-Prot;Acc:Q9T052]	up
AT3G59220	PRN1	Pirin-1 [Source:UniProtKB/Swiss-Prot;Acc:Q9LX49]	up
AT2G46150		Late embryogenesis abundant (LEA) hydroxyproline-rich glycoprotein family [Source:UniProtKB/TrEMBL;Acc:O82354]	up
AT1G63245	CLE14	CLE14 [Source:UniProtKB/TrEMBL;Acc:A0A178WFK0]	up
AT4G39670		ACD11 homolog protein [Source:UniProtKB/Swiss-Prot;Acc:Q8L7U7]	up
AT1G15380		GLYI4 [Source:UniProtKB/TrEMBL;Acc:A0A178W6B2]	up
AT3G55890		Protein yippee-like [Source:UniProtKB/TrEMBL;Acc:Q0WPD7]	up
AT2G28780		p-hydroxybenzoic acid efflux pump subunit [Source:UniProtKB/TrEMBL;Acc:Q84W96]	up
AT1G10680	ABCB10	ABC transporter B family member 10 [Source:UniProtKB/Swiss-Prot;Acc:Q9SGY1]	up
AT2G27660		Cysteine/Histidine-rich C1 domain family protein [Source:UniProtKB/TrEMBL;Acc:Q9ZUW8]	up
AT5G16910	CSLD2	CSLD2 [Source:UniProtKB/TrEMBL;Acc:A0A178UAL6]	up
AT2G27080	NHL13	NDR1/HIN1-like protein 13 [Source:UniProtKB/Swiss-Prot;Acc:Q9ZVD2]	up
AT5G19970		unknown protein; Ha. [Source:TAIR;Acc:AT5G19970]	up
AT5G45340	CYP707A3	Abscisic acid 8'-hydroxylase 3 [Source:UniProtKB/Swiss-Prot;Acc:Q9FH76]	up
AT3G13600	IQM2	Calmodulin-binding family protein [Source:UniProtKB/TrEMBL;Acc:A0A178VF87]	up
AT1G09090	RBOHB	Respiratory burst oxidase homolog protein B [Source:UniProtKB/Swiss-Prot;Acc:Q9SBI0]	up
AT1G10340		Ankyrin repeat family protein [Source:UniProtKB/TrEMBL;Acc:Q9SY76]	up
AT3G22890	APS1	ATP sulfurylase 1, chloroplastic [Source:UniProtKB/Swiss-Prot;Acc:Q9LIK9]	up
AT5G62570		Calmodulin binding protein-like [Source:TAIR;Acc:AT5G62570]	up
AT1G02310	MAN1	MAN1 [Source:UniProtKB/TrEMBL;Acc:A0A178WL81]	up
AT1G02230	NAC004	NAC domain-containing protein 4 [Source:UniProtKB/Swiss-Prot;Acc:O81913]	up
AT4G04610	2019-04-01	5'-adenylylsulfate reductase 1, chloroplastic [Source:UniProtKB/Swiss-Prot;Acc:P92979]	up
AT1G61360		Serine/threonine-protein kinase [Source:UniProtKB/TrEMBL;Acc:A0A178W9H1]	up
AT5G61560		U-box domain-containing protein kinase family protein [Source:TAIR;Acc:AT5G61560]	up
AT1G69150		Cysteine/Histidine-rich C1 domain family protein [Source:UniProtKB/TrEMBL;Acc:F4I0J7]	up
AT2G41640		At2g41640/T32G6.16 [Source:UniProtKB/TrEMBL;Acc:O22225]	up
AT1G23710		At1g23710 [Source:UniProtKB/TrEMBL;Acc:Q9ZUC4]	up
AT3G46080	ZAT8	Zinc finger protein ZAT8 [Source:UniProtKB/Swiss-Prot;Acc:Q9LX85]	up
AT2G22200	ERF056	Ethylene-responsive transcription factor ERF056 [Source:UniProtKB/Swiss-Prot;Acc:Q9SIE4]	up
AT1G27100		Actin cross-linking protein [Source:UniProtKB/TrEMBL;Acc:Q0WQH3]	up
AT5G62430	CDF1	Cyclic dof factor 1 [Source:UniProtKB/Swiss-Prot;Acc:Q8W1E3]	up
AT3G02840		ARM repeat superfamily protein [Source:UniProtKB/TrEMBL;Acc:Q9M8S5]	up
AT4G33920		Probable protein phosphatase 2C 63 [Source:UniProtKB/Swiss-Prot;Acc:O81760]	up
AT4G01870		tolB protein-related [Source:TAIR;Acc:AT4G01870]	up
AT2G22500	PUMP5	Mitochondrial uncoupling protein 5 [Source:UniProtKB/Swiss-Prot;Acc:Q9SJY5]	up
AT5G67350		At5g67350 [Source:UniProtKB/TrEMBL;Acc:Q9FN16]	up
AT1G19180	TIFY10A	TIFY10A [Source:UniProtKB/TrEMBL;Acc:A0A178W7G1]	up
AT3G12910		NAC (No Apical Meristem) domain transcriptional regulator superfamily protein [Source:UniProtKB/TrEMBL;Acc:Q9LSI4]	up
AT2G39650		At2g39650 [Source:UniProtKB/TrEMBL;Acc:O48813]	up
AT1G04610	YUC3	Probable indole-3-pyruvate monooxygenase YUCCA3 [Source:UniProtKB/Swiss-Prot;Acc:O23024]	up
AT2G38860	DJ1E	DJ-1 protein homolog E [Source:UniProtKB/Swiss-Prot;Acc:Q9ZV19]	up
AT1G14550	PER5	Peroxidase 5 [Source:UniProtKB/Swiss-Prot;Acc:Q9M9Q9]	up
AT1G25220	ASB1	Anthranilate synthase beta subunit 1 [Source:UniProtKB/TrEMBL;Acc:F4IAW5]	up
AT3G12500	CHI-B	Basic endochitinase B [Source:UniProtKB/Swiss-Prot;Acc:P19171]	up
AT1G18740		At1g18740/F6A14_15 [Source:UniProtKB/TrEMBL;Acc:Q9M9U5]	up
AT3G23000	CIPK7	CBL-interacting serine/threonine-protein kinase 7 [Source:UniProtKB/Swiss-Prot;Acc:Q9XIW0]	up
AT5G17990	PAT1	Anthranilate phosphoribosyltransferase, chloroplastic [Source:UniProtKB/Swiss-Prot;Acc:Q02166]	up
AT1G02360		Chitinase family protein [Source:TAIR;Acc:AT1G02360]	up
Reference: Lee, J., K. He, V. Stolc, H. Lee, P. Figueroa, Y. Gao, W. Tongprasit, H. Y. Zhao, I. Lee and X. Deng (2007). "Analysis of transcription factor HY5 genomic binding sites revealed its hierarchical role in light regulation of development." Plant Cell 19(3): 731-749.
