# Supplementary material for: HY5 Contributes to Light-Regulated Root System Architecture Under a Root-Covered Culture System
Source: Front Plant Sci. 2019 Nov 28;10:1490. doi: 10.3389/fpls.2019.01490 (PMC6892842; doi:10.3389/fpls.2019.01490)
Supplement: Table S6 — Overlap of genes in the DEGs of dark-grown WT roots grown under the RCS and those grown in the D-root system. [file Table_6.xlsx]

## Sheet: Overlapping genes with D-root
Supplemental Table S6 Overlapping genes in the differentially expressed genes (DEGs) of WT-covered under root-covered system (RCS) and those under D-root
Gene locus	Gene name	Gene descriptions
AT4G09750		NAD(P)-binding Rossmann-fold superfamily protein [Source:UniProtKB/TrEMBL;Acc:Q9SZ91]
AT5G53970		Probable aminotransferase TAT2 [Source:UniProtKB/Swiss-Prot;Acc:Q9FN30]
AT3G16140	PSAH1	Photosystem I reaction center subunit VI-1, chloroplastic [Source:UniProtKB/Swiss-Prot;Acc:Q9SUI7]
AT2G21960		Expressed protein [Source:UniProtKB/TrEMBL;Acc:Q9SJ03]
AT3G47070		Thylakoid soluble phosphoprotein [Source:UniProtKB/TrEMBL;Acc:Q9SD66]
AT2G26500		At2g26500/T9J22.17 [Source:UniProtKB/TrEMBL;Acc:O48717]
AT2G38465		Expressed protein [Source:UniProtKB/TrEMBL;Acc:Q8S8P4]
AT1G62750	CPEFG	Elongation factor G, chloroplastic [Source:UniProtKB/Swiss-Prot;Acc:Q9SI75]
AT1G71500		Rieske (2Fe-2S) domain-containing protein [Source:UniProtKB/TrEMBL;Acc:Q9C9I7]
AT2G20260	PSAE2	Photosystem I reaction center subunit IV B, chloroplastic [Source:UniProtKB/Swiss-Prot;Acc:Q9S714]
AT5G43630	TZP	Zinc knuckle (CCHC-type) family protein [Source:UniProtKB/TrEMBL;Acc:Q9FIX7]
AT2G46420		At2g46420/F11C10.11 [Source:UniProtKB/TrEMBL;Acc:Q9SKD8]
AT4G05180	PSBQ2	Oxygen-evolving enhancer protein 3-2, chloroplastic [Source:UniProtKB/Swiss-Prot;Acc:Q41932]
AT1G58848	RF9	Probable disease resistance protein RDL6 [Source:UniProtKB/Swiss-Prot;Acc:P0DI18]
AT5G15970	KIN2	KIN2 [Source:UniProtKB/TrEMBL;Acc:A0A384KRF8]
AT1G23740	AOR	NADPH-dependent alkenal/one oxidoreductase, chloroplastic [Source:UniProtKB/Swiss-Prot;Acc:Q9ZUC1]
AT1G52870		At1g52870/F14G24_14 [Source:UniProtKB/TrEMBL;Acc:Q9C933]
AT3G04420	anac048	AT3g04420/T27C4_6 [Source:UniProtKB/TrEMBL;Acc:Q8W4R4]
AT1G25440	COL16	Zinc finger protein CONSTANS-LIKE 16 [Source:UniProtKB/Swiss-Prot;Acc:Q8RWD0]
AT3G55120	CHI1	Chalcone--flavonone isomerase 1 [Source:UniProtKB/Swiss-Prot;Acc:P41088]
AT5G11260	HY5	Basic-leucine zipper (bZIP) transcription factor family protein [Source:TAIR;Acc:AT5G11260]
AT4G09650	ATPD	PDE332 [Source:UniProtKB/TrEMBL;Acc:A0A178V1L3]
AT4G34190	2019-09-01	Stress enhanced protein 1, chloroplastic [Source:UniProtKB/Swiss-Prot;Acc:Q9M7I9]
AT5G41590		Protein LURP-one-related 17 [Source:UniProtKB/Swiss-Prot;Acc:A0MFL4]
AT4G12500		pEARLI1-like lipid transfer protein 3 [Source:UniProtKB/Swiss-Prot;Acc:Q9SU33]
AT1G50450		At1g50450/F11F12_20 [Source:UniProtKB/TrEMBL;Acc:Q94BZ0]
AT1G32470	GDH3	Glycine cleavage system H protein 3, mitochondrial [Source:UniProtKB/Swiss-Prot;Acc:Q9LQL0]
AT5G07190	ATS3	Embryo-specific protein ATS3 [Source:UniProtKB/Swiss-Prot;Acc:Q9LYP6]
AT2G33250		At2g33250/F25I18.1 [Source:UniProtKB/TrEMBL;Acc:O22777]
AT2G05310		Expressed protein [Source:UniProtKB/TrEMBL;Acc:Q9SJ31]
AT5G16010		3-oxo-5-alpha-steroid 4-dehydrogenase family protein [Source:UniProtKB/TrEMBL;Acc:Q9LFS3]
AT4G26150	GATA22	Putative GATA transcription factor 22 [Source:UniProtKB/Swiss-Prot;Acc:Q9SZI6]
AT3G57190	PRFB3	PrfB3 [Source:UniProtKB/TrEMBL;Acc:A0A178VAE2]
AT4G23260	CRK18	Cysteine-rich receptor-like protein kinase 18 [Source:UniProtKB/Swiss-Prot;Acc:Q8RX80]
AT4G04330	RBCX1	Chaperonin-like RBCX protein 1, chloroplastic [Source:UniProtKB/Swiss-Prot;Acc:Q94AU9]
AT1G12250	TL20.3	Thylakoid lumenal protein TL20.3, chloroplastic [Source:UniProtKB/Swiss-Prot;Acc:Q8H1Q1]
AT3G52740	BIC1	Protein BIC1 [Source:UniProtKB/Swiss-Prot;Acc:Q9LXJ1]
AT4G37800	XTH7	Probable xyloglucan endotransglucosylase/hydrolase protein 7 [Source:UniProtKB/Swiss-Prot;Acc:Q8LER3]
AT5G19850		Alpha/beta-Hydrolases superfamily protein [Source:UniProtKB/TrEMBL;Acc:F4K2M9]
AT4G14690	ELIP2	Early light-induced protein 2, chloroplastic [Source:UniProtKB/Swiss-Prot;Acc:Q94K66]
AT5G52250	RUP1	WD repeat-containing protein RUP1 [Source:UniProtKB/Swiss-Prot;Acc:Q9LTJ6]
AT4G28750	PSAE1	Photosystem I reaction center subunit IV A, chloroplastic [Source:UniProtKB/Swiss-Prot;Acc:Q9S831]
AT2G43530	ATTI3	Defensin-like protein 194 [Source:UniProtKB/Swiss-Prot;Acc:O22867]
AT1G53090	SPA4	SPA4 [Source:UniProtKB/TrEMBL;Acc:A0A178WBA0]
AT5G13930	CHS	Chalcone synthase family protein [Source:UniProtKB/TrEMBL;Acc:Q460R0]
AT1G34000	OHP2	OHP2 [Source:UniProtKB/TrEMBL;Acc:A0A178WAB5]
AT4G15530	PPDK	Pyruvate, phosphate dikinase 1, chloroplastic [Source:UniProtKB/Swiss-Prot;Acc:O23404]
AT1G25275		AT1G25275 protein [Source:UniProtKB/TrEMBL;Acc:B9DG55]
AT1G79040	PSBR	Photosystem II 10 kDa polypeptide, chloroplastic [Source:UniProtKB/Swiss-Prot;Acc:P27202]
AT5G51010		Rubredoxin-like superfamily protein [Source:UniProtKB/TrEMBL;Acc:Q9FI47]
AT4G12800	PSAL	photosystem I subunit l [Source:TAIR;Acc:AT4G12800]
AT2G34080		Cysteine proteinases superfamily protein [Source:UniProtKB/TrEMBL;Acc:O22961]
AT3G52340	SPP2	Sucrose-6F-phosphate phosphohydrolase 2 [Source:UniProtKB/TrEMBL;Acc:A0A1I9LQG1]
AT5G51110	ATP1	Probable pterin-4-alpha-carbinolamine dehydratase, chloroplastic [Source:UniProtKB/Swiss-Prot;Acc:Q9LU63]
AT2G47460	MYB12	Transcription factor MYB12 [Source:UniProtKB/Swiss-Prot;Acc:O22264]
AT1G29240		F28N24.8 protein [Source:UniProtKB/TrEMBL;Acc:Q9LP52]
AT5G22020		At5g22020 [Source:UniProtKB/TrEMBL;Acc:Q9C586]
AT5G16530	PIN5	Auxin efflux carrier component [Source:UniProtKB/TrEMBL;Acc:A0A178UIR3]
AT3G17609	HYH	HYH [Source:UniProtKB/TrEMBL;Acc:A0A178VIU6]
AT2G23000	SCPL10	Scpl10 [Source:UniProtKB/TrEMBL;Acc:A0A178VYK6]
AT1G52220	CURT1C	CURT1C [Source:UniProtKB/TrEMBL;Acc:A0A178WBD4]
AT2G33180		Uncharacterized protein At2g33180 [Source:UniProtKB/TrEMBL;Acc:O49317]
AT2G37660		Uncharacterized protein At2g37660, chloroplastic [Source:UniProtKB/Swiss-Prot;Acc:O80934]
AT5G19500		At5g19500 [Source:UniProtKB/TrEMBL;Acc:Q5PP33]
AT3G26060	ATPRX Q	Thioredoxin superfamily protein [Source:UniProtKB/TrEMBL;Acc:F4JBC9]
AT5G57030	LUT2	Lycopene epsilon cyclase, chloroplastic [Source:UniProtKB/Swiss-Prot;Acc:Q38932]
AT5G57780		At5g57780 [Source:UniProtKB/TrEMBL;Acc:Q9FJN6]
AT3G63540		Mog1/PsbP/DUF1795-like photosystem II reaction center PsbP family protein [Source:TAIR;Acc:AT3G63540]
AT5G48880	KAT5	PKT2 [Source:UniProtKB/TrEMBL;Acc:A0A178UEC0]
AT1G74470	CHLP	Geranylgeranyl diphosphate reductase, chloroplastic [Source:UniProtKB/Swiss-Prot;Acc:Q9CA67]
AT1G65060	4CL3	4-coumarate--CoA ligase 3 [Source:UniProtKB/Swiss-Prot;Acc:Q9S777]
AT1G61520	LHCA3	Chlorophyll a-b binding protein, chloroplastic [Source:UniProtKB/TrEMBL;Acc:A0A178W5Y6]
AT4G27030	FAD4	FADA [Source:UniProtKB/TrEMBL;Acc:A0A178UUY9]
AT3G02730	TRXF1	TRXF1 [Source:UniProtKB/TrEMBL;Acc:A0A178VBJ7]
AT1G76730	COG0212	COG0212 [Source:UniProtKB/TrEMBL;Acc:A0A178WEK7]
AT5G23120	HCF136	photosystem II stability/assembly factor, chloroplast (HCF136) [Source:TAIR;Acc:AT5G23120]
AT1G01170		At1g01170 [Source:UniProtKB/TrEMBL;Acc:Q2HIQ2]
AT1G13670		At1g13670 [Source:UniProtKB/TrEMBL;Acc:Q9LMY0]
AT1G75690	LQY1	LQY1 [Source:UniProtKB/TrEMBL;Acc:A0A178W9N8]
AT2G29630	THIC	Phosphomethylpyrimidine synthase, chloroplastic [Source:UniProtKB/Swiss-Prot;Acc:O82392]
AT4G15480	UGT84A1	UDP-glycosyltransferase 84A1 [Source:UniProtKB/Swiss-Prot;Acc:Q5XF20]
AT3G48690	CXE12	Probable carboxylesterase 12 [Source:UniProtKB/Swiss-Prot;Acc:Q9SMN0]
AT2G24820	TIC55	Protein TIC 55, chloroplastic [Source:UniProtKB/Swiss-Prot;Acc:Q9SK50]
AT2G36870	XTH32	Probable xyloglucan endotransglucosylase/hydrolase protein 32 [Source:UniProtKB/Swiss-Prot;Acc:Q9SJL9]
AT1G06680	PSBP1	Oxygen-evolving enhancer protein 2-1, chloroplastic [Source:UniProtKB/Swiss-Prot;Acc:Q42029]
AT2G02950	PKS1	Protein PHYTOCHROME KINASE SUBSTRATE 1 [Source:UniProtKB/Swiss-Prot;Acc:Q9SWI1]
AT5G04000		unknown protein; Ha. [Source:TAIR;Acc:AT5G04000]
AT1G53670	MSRB1	Peptide methionine sulfoxide reductase B1, chloroplastic [Source:UniProtKB/Swiss-Prot;Acc:Q9C8M2]
AT1G52100		Mannose-binding lectin superfamily protein [Source:TAIR;Acc:AT1G52100]
AT2G37970	SOUL-1	SOUL heme-binding family protein [Source:TAIR;Acc:AT2G37970]
AT2G22590	UGT91A1	UDP-glycosyltransferase 91A1 [Source:UniProtKB/Swiss-Prot;Acc:Q940V3]
AT2G39730	RCA	Ribulose bisphosphate carboxylase/oxygenase activase, chloroplastic [Source:UniProtKB/Swiss-Prot;Acc:P10896]
AT5G44574		unknown protein; FUNCTIONS IN: molecular_function unknown; INVOLVED IN: biological_process unknown; LOCATED IN: endomembrane system; Ha. [Source:TAIR;Acc:AT5G44574]
AT3G61870		AT3g61870/F21F14_40 [Source:UniProtKB/TrEMBL;Acc:Q9M277]
AT4G12480	EARLI1	PEARLI 1 [Source:UniProtKB/TrEMBL;Acc:A0A178V1J0]
AT4G37760	SQE3	Squalene epoxidase 3 [Source:UniProtKB/Swiss-Prot;Acc:Q8VYH2]
AT5G54770	THI1	Thiamine thiazole synthase, chloroplastic [Source:UniProtKB/TrEMBL;Acc:A0A178UNL2]
AT1G18060		AT1g18060/T10F20.23 [Source:UniProtKB/TrEMBL;Acc:Q9LM40]
AT1G32060	PRK	Phosphoribulokinase [Source:UniProtKB/TrEMBL;Acc:A0A178WLP9]
AT5G24160	SQE6	Squalene epoxidase 6 [Source:UniProtKB/Swiss-Prot;Acc:O65402]
AT2G16740	UBC29	UBC29 [Source:UniProtKB/TrEMBL;Acc:A0A178VQZ9]
AT1G72645		At1g72645 [Source:UniProtKB/TrEMBL;Acc:Q8RXY2]
AT1G60600	ABC4	2-carboxy-1,4-naphthoquinone phytyltransferase, chloroplastic [Source:UniProtKB/Swiss-Prot;Acc:Q0WUA3]
AT5G65870	PSK5	Phytosulfokines 5 [Source:UniProtKB/Swiss-Prot;Acc:Q9FEB4]
AT5G63580	FLS2	Putative inactive flavonol synthase 2 [Source:UniProtKB/Swiss-Prot;Acc:B2GVM7]
AT4G36530		Alpha/beta-Hydrolases superfamily protein [Source:UniProtKB/TrEMBL;Acc:O23227]
AT1G68010	HPR	hydroxypyruvate reductase [Source:TAIR;Acc:AT1G68010]
AT5G17700	DTX25	Protein DETOXIFICATION [Source:UniProtKB/TrEMBL;Acc:A0A178UJQ3]
AT1G50250	FTSH1	ATP-dependent zinc metalloprotease FTSH 1, chloroplastic [Source:UniProtKB/Swiss-Prot;Acc:Q39102]
AT1G06540		F12K11.13 [Source:UniProtKB/TrEMBL;Acc:Q9SHJ7]
AT1G13610		Alpha/beta-Hydrolases superfamily protein [Source:UniProtKB/TrEMBL;Acc:Q9FZ68]
AT1G73650		Protein of unknown function (DUF1295) [Source:TAIR;Acc:AT1G73650]
AT3G23530		AT3g23510/MEE5_5 [Source:UniProtKB/TrEMBL;Acc:Q8VZH1]
AT2G16890	UGT90A1	UDP-glycosyltransferase 90A1 [Source:UniProtKB/Swiss-Prot;Acc:Q9ZVX4]
AT2G32640		Lycopene beta/epsilon cyclase protein [Source:UniProtKB/TrEMBL;Acc:Q0WVA1]
AT5G17780		alpha/beta-Hydrolases superfamily protein [Source:TAIR;Acc:AT5G17780]
AT2G38870		Putative protease inhibitor [Source:UniProtKB/TrEMBL;Acc:Q9ZV18]
AT3G17040	HCF107	Protein high chlorophyll fluorescent 107 [Source:UniProtKB/Swiss-Prot;Acc:Q8RWG2]
AT3G61220		NAD(P)-binding Rossmann-fold superfamily protein [Source:UniProtKB/TrEMBL;Acc:A0A1I9LNT2]
AT1G35420		Alpha/beta-Hydrolases superfamily protein [Source:UniProtKB/TrEMBL;Acc:F4HYC8]
AT4G04750		Major facilitator superfamily protein [Source:TAIR;Acc:AT4G04750]
AT3G26080		Plastid-lipid associated protein PAP / fibrillin family protein [Source:UniProtKB/TrEMBL;Acc:A0A1I9LP70]
AT3G57640		At3g57640 [Source:UniProtKB/TrEMBL;Acc:Q9SVX8]
AT1G45474	LHCA5	Photosystem I chlorophyll a/b-binding protein 5, chloroplastic [Source:UniProtKB/Swiss-Prot;Acc:Q9C639]
AT5G50100		Uncharacterized protein At5g50100, chloroplastic [Source:UniProtKB/Swiss-Prot;Acc:Q8W485]
AT2G34810		Berberine bridge enzyme-like 16 [Source:UniProtKB/Swiss-Prot;Acc:O64745]
AT4G32770	VTE1	Tocopherol cyclase, chloroplastic [Source:UniProtKB/Swiss-Prot;Acc:Q94FY7]
AT1G06430	FTSH8	ATP-dependent zinc metalloprotease FTSH 8, chloroplastic [Source:UniProtKB/Swiss-Prot;Acc:Q8W585]
AT4G04840	MSRB6	MSRB6 [Source:UniProtKB/TrEMBL;Acc:A0A178V4R5]
AT4G10340	LHCB5	Chlorophyll a-b binding protein, chloroplastic [Source:UniProtKB/TrEMBL;Acc:A0A178UW55]
AT1G20020	LFNR2	Ferredoxin--NADP reductase, leaf isozyme 2, chloroplastic [Source:UniProtKB/Swiss-Prot;Acc:Q8W493]
AT4G27560	UGT79B2	UDP-glycosyltransferase 79B2 [Source:UniProtKB/Swiss-Prot;Acc:Q9T080]
AT3G54890	LHCA1	Chlorophyll a-b binding protein, chloroplastic [Source:UniProtKB/TrEMBL;Acc:A0A178VBT7]
AT4G25050	ACP4	Acyl carrier protein 4 [Source:UniProtKB/TrEMBL;Acc:F4JRT7]
AT4G12470	AZI1	pEARLI1-like lipid transfer protein 1 [Source:UniProtKB/Swiss-Prot;Acc:Q9SU35]
AT4G00370	PHT4;4	Ascorbate transporter, chloroplastic [Source:UniProtKB/Swiss-Prot;Acc:Q8GX78]
AT5G66570	PSBO1	Oxygen-evolving enhancer protein 1-1, chloroplastic [Source:UniProtKB/Swiss-Prot;Acc:P23321]
AT4G08150	KNAT1	Homeobox protein knotted-1-like 1 [Source:UniProtKB/Swiss-Prot;Acc:P46639]
AT1G49975		At1g49975 [Source:UniProtKB/TrEMBL;Acc:Q8LFL5]
AT4G17600	LIL3.1	Light-harvesting complex-like protein 3 isotype 1, chloroplastic [Source:UniProtKB/Swiss-Prot;Acc:Q9SYX1]
AT1G31330	PSAF	Photosystem I reaction center subunit III, chloroplastic [Source:UniProtKB/Swiss-Prot;Acc:Q9SHE8]
AT5G17040	UGT78D4	UDP-glycosyltransferase 78D4 [Source:UniProtKB/Swiss-Prot;Acc:Q9LFJ9]
AT3G54990	SMZ	AP2-like ethylene-responsive transcription factor SMZ [Source:UniProtKB/Swiss-Prot;Acc:Q6PV68]
AT3G08700	UBC12	Probable ubiquitin-conjugating enzyme E2 12 [Source:UniProtKB/Swiss-Prot;Acc:Q9C9Y7]
AT3G11210	CPRD49	GDSL esterase/lipase CPRD49 [Source:UniProtKB/Swiss-Prot;Acc:Q9SRM5]
AT2G48090		unknown protein; FUNCTIONS IN: molecular_function unknown; INVOLVED IN: biological_process unknown; LOCATED IN: chloroplast; EXPRESSED IN: male gametophyte, root, flower, carpel; EXPRESSED DURING: 4 anthesis, petal differentiation and expansion stage. [Source:TAIR;Acc:AT2G48090]
AT2G36990	SIGF	RNA polymerase sigma factor sigF, chloroplastic [Source:UniProtKB/Swiss-Prot;Acc:Q9LD95]
AT1G69310	WRKY57	At1g69310 [Source:UniProtKB/TrEMBL;Acc:Q147N6]
AT4G33660		Adhesive/proline-rich-like protein [Source:UniProtKB/TrEMBL;Acc:Q8LG30]
AT1G19140		FUNCTIONS IN: molecular_function unknown; INVOLVED IN: ubiquinone biosynthetic process; LOCATED IN: mitochondrion; EXPRESSED IN: 24 plant structures; EXPRESSED DURING: 15 growth stages; CONTAINS InterPro DOMAIN/s: COQ9 (InterPro:IPR013718), Ubiquino /.../synthesis protein COQ9 (InterPro:IPR012762); Ha. [Source:TAIR;Acc:AT1G19140]
AT5G04140	GLU1	glutamate synthase 1 [Source:TAIR;Acc:AT5G04140]
AT5G19940	PAP8	Probable plastid-lipid-associated protein 8, chloroplastic [Source:UniProtKB/Swiss-Prot;Acc:Q941D3]
AT5G47110	LIL3.2	Light-harvesting complex-like protein 3 isotype 2, chloroplastic [Source:UniProtKB/Swiss-Prot;Acc:Q6NKS4]
AT5G38520		Alpha/beta-Hydrolases superfamily protein [Source:UniProtKB/TrEMBL;Acc:F4KBJ3]
AT1G03630	PORC	Protochlorophyllide reductase C, chloroplastic [Source:UniProtKB/Swiss-Prot;Acc:O48741]
AT2G18480	PLT3	Probable polyol transporter 3 [Source:UniProtKB/Swiss-Prot;Acc:Q9ZNS0]
AT3G61470	LHCA2	Photosystem I chlorophyll a/b-binding protein 2, chloroplastic [Source:UniProtKB/Swiss-Prot;Acc:Q9SYW8]
AT3G12955		At3g12955 [Source:UniProtKB/TrEMBL;Acc:Q9LSI2]
AT2G29450	GSTU5	GSTU5 [Source:UniProtKB/TrEMBL;Acc:A0A178VPP0]
AT4G34830	MRL1	Pentatricopeptide repeat-containing protein MRL1, chloroplastic [Source:UniProtKB/Swiss-Prot;Acc:Q0WLC6]
AT1G67090	RBCS-1A	Ribulose bisphosphate carboxylase small chain [Source:UniProtKB/TrEMBL;Acc:A0A178WD57]
AT4G37310	CYP81H1	Cytochrome P450, family 81, subfamily H, polypeptide 1 [Source:UniProtKB/TrEMBL;Acc:Q9SW67]
AT3G51820	CHLG	Chlorophyll synthase, chloroplastic [Source:UniProtKB/Swiss-Prot;Acc:Q38833]
AT1G30380	PSAK	Photosystem I reaction center subunit psaK, chloroplastic [Source:UniProtKB/Swiss-Prot;Acc:Q9SUI5]
AT3G21520	DMP1	Protein DMP1 [Source:UniProtKB/Swiss-Prot;Acc:Q9LVF4]
AT2G30570	PSBW	PSBW [Source:UniProtKB/TrEMBL;Acc:A0A178VQ32]
AT5G64940	ATATH13	Protein ACTIVITY OF BC1 COMPLEX KINASE 8, chloroplastic [Source:UniProtKB/Swiss-Prot;Acc:Q93Y08]
AT2G16385	CIF1	Protein CASPARIAN STRIP INTEGRITY FACTOR 1 [Source:UniProtKB/Swiss-Prot;Acc:Q84MD2]
AT3G48700	CXE13	Probable carboxylesterase 13 [Source:UniProtKB/Swiss-Prot;Acc:Q9SMM9]
AT3G57020	SSL9	Protein STRICTOSIDINE SYNTHASE-LIKE 9 [Source:UniProtKB/Swiss-Prot;Acc:Q9M1J6]
AT1G67740	PSBY	Putative uncharacterized protein [Source:UniProtKB/TrEMBL;Acc:Q549N8]
AT1G75460		ATP-dependent protease La (LON) domain protein [Source:UniProtKB/TrEMBL;Acc:Q9FWT4]
AT3G26070	PAP4	Probable plastid-lipid-associated protein 4, chloroplastic [Source:UniProtKB/Swiss-Prot;Acc:Q9LU85]
AT1G22750		AT1G22750 protein [Source:UniProtKB/TrEMBL;Acc:O64379]
AT3G47030		F-box protein At3g47030 [Source:UniProtKB/Swiss-Prot;Acc:Q9SD70]
AT5G28500	RAF1.1	Rubisco accumulation factor 1.1, chloroplastic [Source:UniProtKB/Swiss-Prot;Acc:Q9LKR8]
AT5G05270	CHI3	Probable chalcone--flavonone isomerase 3 [Source:UniProtKB/Swiss-Prot;Acc:Q8VZW3]
AT1G42970	GAPB	Glyceraldehyde-3-phosphate dehydrogenase GAPB, chloroplastic [Source:UniProtKB/Swiss-Prot;Acc:P25857]
AT4G02770	PSAD1	Photosystem I reaction center subunit II-1, chloroplastic [Source:UniProtKB/Swiss-Prot;Acc:Q9S7H1]
AT5G24850	CRYD	Cryptochrome DASH, chloroplastic/mitochondrial [Source:UniProtKB/Swiss-Prot;Acc:Q84KJ5]
AT1G14345		NAD(P)-linked oxidoreductase superfamily protein [Source:UniProtKB/TrEMBL;Acc:Q949S6]
AT5G16970	AER	NADPH-dependent oxidoreductase 2-alkenal reductase [Source:UniProtKB/Swiss-Prot;Acc:Q39172]
AT1G23010	LPR1	Multicopper oxidase LPR1 [Source:UniProtKB/Swiss-Prot;Acc:F4I4K5]
AT5G62210		Embryo-specific protein 3, (ATS3) [Source:UniProtKB/TrEMBL;Acc:Q9LVB5]
AT5G37550		At5g37550 [Source:UniProtKB/TrEMBL;Acc:Q9FGI2]
AT2G34460		Uncharacterized protein At2g34460, chloroplastic [Source:UniProtKB/Swiss-Prot;Acc:Q8H124]
AT2G28605	PPD2	PsbP domain-containing protein 2, chloroplastic [Source:UniProtKB/Swiss-Prot;Acc:Q8VY52]
AT1G78450		F3F9.4 [Source:UniProtKB/TrEMBL;Acc:Q9SYN6]
AT3G56940	CRD1	Magnesium-protoporphyrin IX monomethyl ester [oxidative] cyclase, chloroplastic [Source:UniProtKB/Swiss-Prot;Acc:Q9M591]
AT5G07990	CYP75B1	TT7 [Source:UniProtKB/TrEMBL;Acc:A0A178UNZ9]
AT4G37150	MES9	MES9 [Source:UniProtKB/TrEMBL;Acc:A0A178V387]
AT1G15820	LHCB6	Chlorophyll a-b binding protein, chloroplastic [Source:UniProtKB/TrEMBL;Acc:Q9LMQ2]
AT1G06690		Uncharacterized oxidoreductase At1g06690, chloroplastic [Source:UniProtKB/Swiss-Prot;Acc:Q94A68]
AT2G36145		Expressed protein [Source:UniProtKB/TrEMBL;Acc:Q8VXY0]
AT1G17100		HBP1 [Source:UniProtKB/TrEMBL;Acc:A0A178W6J0]
AT5G08050		Wiskott-aldrich syndrome family protein, putative (DUF1118) [Source:UniProtKB/TrEMBL;Acc:Q9SD79]
AT5G02160		AT5g02160 [Source:UniProtKB/TrEMBL;Acc:Q9FPH2]
AT1G60260	BGLU5	beta glucosidase 5 [Source:TAIR;Acc:AT1G60260]
AT5G08710		RUG1 [Source:UniProtKB/TrEMBL;Acc:A0A178UAH3]
AT4G26850	VTC2	GDP-L-galactose phosphorylase 1 [Source:UniProtKB/Swiss-Prot;Acc:Q8RWE8]
AT1G57770		FAD/NAD(P)-binding oxidoreductase family protein [Source:UniProtKB/TrEMBL;Acc:Q9FVR9]
AT4G24930		Thylakoid lumenal 17.9 kDa protein, chloroplastic [Source:UniProtKB/Swiss-Prot;Acc:Q9SW33]
AT3G09520	ATEXO70H4	Exocyst subunit Exo70 family protein [Source:UniProtKB/TrEMBL;Acc:Q9SF51]
AT1G10370	GSTU17	Glutathione S-transferase U17 [Source:UniProtKB/Swiss-Prot;Acc:Q9FUS8]
AT5G23000	RAX1	Transcription factor RAX1 [Source:UniProtKB/Swiss-Prot;Acc:Q9FG68]
AT1G78970	LUP1	Lupeol synthase 1 [Source:UniProtKB/Swiss-Prot;Acc:Q9C5M3]
AT5G08640	FLS1	Flavonol synthase/flavanone 3-hydroxylase [Source:UniProtKB/Swiss-Prot;Acc:Q96330]
AT2G21970	2019-09-02	SEP2 [Source:UniProtKB/TrEMBL;Acc:A0A178VQ84]
AT1G08380	PSAO	PSAO [Source:UniProtKB/TrEMBL;Acc:A0A178W5Y5]
AT5G04830		Nuclear transport factor 2 (NTF2) family protein [Source:UniProtKB/TrEMBL;Acc:Q9FMC7]
AT2G45450	ZPR1	Protein LITTLE ZIPPER 1 [Source:UniProtKB/Swiss-Prot;Acc:F4IG60]
AT1G78460		AT1G78460 protein [Source:UniProtKB/TrEMBL;Acc:Q9SYN5]
AT1G55480	ZKT	Protein MET1, chloroplastic [Source:UniProtKB/Swiss-Prot;Acc:Q94BS2]
AT4G28660	PSB28	Photosystem II reaction center Psb28 protein [Source:UniProtKB/TrEMBL;Acc:F4JM05]
AT3G26570	PHT2;1	phosphate transporter 2;1 [Source:TAIR;Acc:AT3G26570]
AT1G55670	PSAG	Photosystem I reaction center subunit V, chloroplastic [Source:UniProtKB/Swiss-Prot;Acc:Q9S7N7]
AT5G17050	UGT78D2	Glycosyltransferase (Fragment) [Source:UniProtKB/TrEMBL;Acc:W8PUE7]
AT5G57180	CIA2	CIA2 [Source:UniProtKB/TrEMBL;Acc:A0A178UDY1]
AT5G44110	ABCI21	ABC transporter I family member 21 [Source:UniProtKB/Swiss-Prot;Acc:Q9XF19]
AT1G31800	CYP97A3	Protein LUTEIN DEFICIENT 5, chloroplastic [Source:UniProtKB/Swiss-Prot;Acc:Q93VK5]
AT1G68590		30S ribosomal protein 3-1, chloroplastic [Source:UniProtKB/Swiss-Prot;Acc:Q9SX22]
AT2G42220	STR9	Rhodanese-like domain-containing protein 9, chloroplastic [Source:UniProtKB/Swiss-Prot;Acc:O48529]
AT1G66725	MIR163	MIR163; miRNA [Source:TAIR;Acc:AT1G66725]
AT3G15354	SPA3	Protein SPA1-RELATED 3 [Source:UniProtKB/Swiss-Prot;Acc:Q9LJR3]
AT4G21280	PSBQ1	Oxygen-evolving enhancer protein 3-1, chloroplastic [Source:UniProtKB/Swiss-Prot;Acc:Q9XFT3]
AT2G37240		Thioredoxin-like protein AAED1, chloroplastic [Source:UniProtKB/Swiss-Prot;Acc:Q9ZUU2]
AT4G35250		HCF244 [Source:UniProtKB/TrEMBL;Acc:A0A178UXV2]
AT2G35260		At2g35260/T4C15.7 [Source:UniProtKB/TrEMBL;Acc:O82167]
AT2G28700	AGL46	AGAMOUS-like 46 [Source:UniProtKB/TrEMBL;Acc:F4IIT6]
AT3G26650	GAPA1	Glyceraldehyde-3-phosphate dehydrogenase GAPA1, chloroplastic [Source:UniProtKB/Swiss-Prot;Acc:P25856]
AT2G23910		At2g23910 [Source:UniProtKB/TrEMBL;Acc:O82219]
AT5G13630	CHLH	Magnesium-chelatase subunit ChlH, chloroplastic [Source:UniProtKB/Swiss-Prot;Acc:Q9FNB0]
AT5G46350	WRKY8	WRKY transcription factor 8 [Source:UniProtKB/Swiss-Prot;Acc:Q9FL26]
AT4G28740		FUNCTIONS IN: molecular_function unknown; INVOLVED IN: biological_process unknown; LOCATED IN: chloroplast; EXPRESSED IN: 21 plant structures; EXPRESSED DURING: 13 growth stages; CONTAINS InterPro DOMAIN/s: Protein of unknown function DUF3493 (Inter /.../R021883); BEST Arabidopsis thaliana protein match is: tetratricopeptide repeat (TPR)-containing protein (TAIR:AT1G02910.1); Ha. [Source:TAIR;Acc…
AT5G57345		At5g57345 [Source:UniProtKB/TrEMBL;Acc:Q8LAD4]
AT2G33855		At2g33855 [Source:UniProtKB/TrEMBL;Acc:Q29Q74]
AT1G02340	HFR1	Transcription factor HFR1 [Source:UniProtKB/Swiss-Prot;Acc:Q9FE22]
AT3G44450	BIC2	Protein BIC2 [Source:UniProtKB/Swiss-Prot;Acc:Q9M280]
AT4G04640	ATPC1	ATP synthase gamma chain 1, chloroplastic [Source:UniProtKB/Swiss-Prot;Acc:Q01908]
AT1G74730		Transmembrane protein, putative (DUF1118) [Source:UniProtKB/TrEMBL;Acc:Q94F10]
AT5G52970		Thylakoid lumenal 15.0 kDa protein 2, chloroplastic [Source:UniProtKB/Swiss-Prot;Acc:Q9LVV5]
AT2G16365		F-box protein At2g16365 [Source:UniProtKB/Swiss-Prot;Acc:Q84V03]
AT1G33560	ADR1	Disease resistance protein ADR1 [Source:UniProtKB/Swiss-Prot;Acc:Q9FW44]
AT1G11330		G-type lectin S-receptor-like serine/threonine-protein kinase At1g11330 [Source:UniProtKB/Swiss-Prot;Acc:Q9SXB8]
AT1G52230	PSAH2	Photosystem I reaction center subunit VI-2, chloroplastic [Source:UniProtKB/Swiss-Prot;Acc:Q9SUI6]
AT2G25530		AFG1-like ATPase family protein [Source:UniProtKB/TrEMBL;Acc:Q9SKJ6]
AT5G45870	PYL12	Abscisic acid receptor PYL12 [Source:UniProtKB/Swiss-Prot;Acc:Q9FJ49]
AT5G13770		Pentatricopeptide repeat-containing protein At5g13770, chloroplastic [Source:UniProtKB/Swiss-Prot;Acc:Q66GP4]
AT1G30530	UGT78D1	Glycosyltransferase (Fragment) [Source:UniProtKB/TrEMBL;Acc:W8PVA4]
AT5G24120	SIGE	RNA polymerase sigma factor sigE, chloroplastic/mitochondrial [Source:UniProtKB/Swiss-Prot;Acc:Q9ZNX9]
AT2G05620	PGR5	Protein PROTON GRADIENT REGULATION 5, chloroplastic [Source:UniProtKB/Swiss-Prot;Acc:Q9SL05]
AT5G20220		zinc knuckle (CCHC-type) family protein [Source:TAIR;Acc:AT5G20220]
AT3G44880	PAO	Pheophorbide a oxygenase, chloroplastic [Source:UniProtKB/Swiss-Prot;Acc:Q9FYC2]
AT5G58770		Dehydrodolichyl diphosphate synthase 2 [Source:UniProtKB/Swiss-Prot;Acc:Q56Y11]
AT5G15910		NAD(P)-binding Rossmann-fold superfamily protein [Source:UniProtKB/TrEMBL;Acc:Q949S7]
AT4G18810		NAD(P)-binding Rossmann-fold superfamily protein [Source:UniProtKB/TrEMBL;Acc:F4JRN8]
AT5G35790	G6PD1	Glucose-6-phosphate 1-dehydrogenase 1, chloroplastic [Source:UniProtKB/Swiss-Prot;Acc:Q43727]
AT2G26740	ATSEH	At2g26740/F18A8.11 [Source:UniProtKB/TrEMBL;Acc:Q42566]
AT5G56860	GATA21	GATA transcription factor 21 [Source:UniProtKB/Swiss-Prot;Acc:Q5HZ36]
AT1G66540		At1g66540 [Source:UniProtKB/TrEMBL;Acc:A2RVN3]
AT1G54780	TLP18.3	TLP18.3 [Source:UniProtKB/TrEMBL;Acc:A0A178WHT4]
AT1G60950	FD2	Ferredoxin [Source:UniProtKB/TrEMBL;Acc:A0A178W2W5]
AT4G34730		Probable ribosome-binding factor A, chloroplastic [Source:UniProtKB/Swiss-Prot;Acc:O65693]
AT4G01050	TROL	thylakoid rhodanese-like [Source:TAIR;Acc:AT4G01050]
AT4G29590		S-adenosyl-L-methionine-dependent methyltransferases superfamily protein [Source:UniProtKB/TrEMBL;Acc:Q9SU88]
AT1G54570		Acyltransferase-like protein At1g54570, chloroplastic [Source:UniProtKB/Swiss-Prot;Acc:Q9ZVN2]
AT2G44920		Thylakoid lumenal 15 kDa protein 1, chloroplastic [Source:UniProtKB/Swiss-Prot;Acc:O22160]
AT3G24190		AT3g24190/MUJ8_17 [Source:UniProtKB/TrEMBL;Acc:Q9LRN0]
AT4G15490	UGT84A3	UDP-glycosyltransferase 84A3 [Source:UniProtKB/Swiss-Prot;Acc:O23401]
AT3G16350		At3g16350 [Source:UniProtKB/TrEMBL;Acc:Q84TG2]
AT2G41000		Chaperone DnaJ-domain superfamily protein [Source:UniProtKB/TrEMBL;Acc:B3H694]
AT2G36080	ARF31	B3 domain-containing protein At2g36080 [Source:UniProtKB/Swiss-Prot;Acc:Q8GYJ2]
AT4G23496	SP1L5	Protein SPIRAL1-like 5 [Source:UniProtKB/Swiss-Prot;Acc:Q8LGD1]
AT4G03280	PETC	Cytochrome b6-f complex iron-sulfur subunit, chloroplastic [Source:UniProtKB/Swiss-Prot;Acc:Q9ZR03]
AT3G08860	PYD4	Alanine--glyoxylate aminotransferase 2 homolog 3, mitochondrial [Source:UniProtKB/Swiss-Prot;Acc:Q9SR86]
AT1G12370	PHR1	Deoxyribodipyrimidine photo-lyase [Source:UniProtKB/Swiss-Prot;Acc:Q9SB00]
AT1G26770	ATEXPA10	Expansin [Source:UniProtKB/TrEMBL;Acc:F4HPC1]
AT1G20340	DRT112	Plastocyanin major isoform, chloroplastic [Source:UniProtKB/Swiss-Prot;Acc:P42699]
AT2G35370	GDH1	Glycine cleavage system H protein [Source:UniProtKB/TrEMBL;Acc:A0A178VV72]
AT3G47650		DnaJ/Hsp40 cysteine-rich domain superfamily protein [Source:UniProtKB/TrEMBL;Acc:Q9SN73]
AT2G23840		At2g23840 [Source:UniProtKB/TrEMBL;Acc:Q6NMJ9]
AT4G24350		Phosphorylase superfamily protein [Source:UniProtKB/TrEMBL;Acc:Q94K59]
AT1G76080	CDSP32	CDSP32 [Source:UniProtKB/TrEMBL;Acc:A0A178WHK1]
AT1G27020		Plant/protein [Source:UniProtKB/TrEMBL;Acc:O04551]
AT1G10960	FD1	Ferredoxin-1, chloroplastic [Source:UniProtKB/Swiss-Prot;Acc:O04090]
AT4G18020	APRR2	Two-component response regulator-like APRR2 [Source:UniProtKB/Swiss-Prot;Acc:Q6LA43]
AT3G22840	ELIP1	ELIP1 [Source:UniProtKB/TrEMBL;Acc:A0A178VCA8]
AT1G78440	GA2OX1	Gibberellin 2-beta-dioxygenase 1 [Source:UniProtKB/Swiss-Prot;Acc:Q8LEA2]
AT2G24190		NAD(P)-binding Rossmann-fold superfamily protein [Source:TAIR;Acc:AT2G24190]
AT3G20110	CYP705A20	CYP705A20 [Source:UniProtKB/TrEMBL;Acc:A0A178V8F4]
AT5G54270	LHCB3	Chlorophyll a-b binding protein 3, chloroplastic [Source:UniProtKB/Swiss-Prot;Acc:Q9S7M0]
AT2G06520	PSBX	PSBX [Source:UniProtKB/TrEMBL;Acc:A0A178W0Y5]
AT5G56090	COX15	Cytochrome c oxidase assembly protein COX15 [Source:UniProtKB/Swiss-Prot;Acc:Q9FKT8]
AT5G27810		At5g27810 [Source:UniProtKB/TrEMBL;Acc:Q3E8Z9]
AT5G53880		Putative uncharacterized protein [Source:UniProtKB/TrEMBL;Acc:Q9FN38]
AT4G39510	CYP96A12	CYP96A12 [Source:UniProtKB/TrEMBL;Acc:A0A178V036]
AT3G21055	PSBTN	Photosystem II subunit T [Source:UniProtKB/TrEMBL;Acc:A0A1I9LS90]
AT1G64500		F1N19.7 [Source:UniProtKB/TrEMBL;Acc:Q9SGW5]
AT5G57785		At5g57785 [Source:UniProtKB/TrEMBL;Acc:Q8GY06]
AT1G44575	PSBS	Photosystem II 22 kDa protein, chloroplastic [Source:UniProtKB/Swiss-Prot;Acc:Q9XF91]
AT1G68500		Uncharacterized protein At1g68500 [Source:UniProtKB/TrEMBL;Acc:Q84K42]
AT1G64290		F-box protein-like protein [Source:UniProtKB/TrEMBL;Acc:Q9C7V3]
AT5G14370		CCT motif family protein [Source:UniProtKB/TrEMBL;Acc:Q949T9]
AT3G56290		Potassium transporter [Source:UniProtKB/TrEMBL;Acc:Q9LYL4]
AT1G60270	BGLU6	Putative beta-glucosidase 6 [Source:UniProtKB/Swiss-Prot;Acc:Q682B4]
AT1G59700	GSTU16	Glutathione S-transferase U16 [Source:UniProtKB/Swiss-Prot;Acc:Q9XIF8]
AT3G21560	UGT84A2	UGT84A2 [Source:UniProtKB/TrEMBL;Acc:A0A384L2P1]
AT4G27440	PORB	Protochlorophyllide reductase B, chloroplastic [Source:UniProtKB/Swiss-Prot;Acc:P21218]
AT3G21720	ICL	Isocitrate lyase [Source:UniProtKB/Swiss-Prot;Acc:P28297]
AT5G10100	TPPI	Trehalose 6-phosphate phosphatase [Source:UniProtKB/TrEMBL;Acc:A0A178UDH6]
AT5G23730	RUP2	WD repeat-containing protein RUP2 [Source:UniProtKB/Swiss-Prot;Acc:Q9FFA7]
AT1G77090	PPD4	PsbP domain-containing protein 4, chloroplastic [Source:UniProtKB/Swiss-Prot;Acc:O49292]
AT1G60000		AT1G60000 protein [Source:UniProtKB/TrEMBL;Acc:Q9ZUJ3]
AT3G08660		Putative BTB/POZ domain-containing protein At3g08660 [Source:UniProtKB/Swiss-Prot;Acc:Q9C9Z0]
AT5G17170	ENH1	Rubredoxin family protein [Source:UniProtKB/TrEMBL;Acc:Q9FFJ2]
AT5G65840		Thioredoxin superfamily protein [Source:UniProtKB/TrEMBL;Acc:Q8L5Y8]
AT4G04850	KEA3	K(+) efflux antiporter 3, chloroplastic [Source:UniProtKB/Swiss-Prot;Acc:Q9M0Z3]
AT1G03010		BTB/POZ domain-containing protein At1g03010 [Source:UniProtKB/Swiss-Prot;Acc:Q9SA69]
AT3G56710	SIB1	SIB1 [Source:UniProtKB/TrEMBL;Acc:A0A178VMX5]
AT3G29410	TPS25	Terpenoid synthase 25 [Source:UniProtKB/Swiss-Prot;Acc:Q9LIA1]
AT1G73805	SARD1	Protein SAR DEFICIENT 1 [Source:UniProtKB/Swiss-Prot;Acc:Q9C9T2]
AT5G39150		Germin-like protein subfamily 1 member 17 [Source:UniProtKB/Swiss-Prot;Acc:Q9FIC6]
AT2G32160		AT2G32160 protein [Source:UniProtKB/TrEMBL;Acc:B3H6T0]
AT1G62280	SLAH1	SLAH1 [Source:UniProtKB/TrEMBL;Acc:A0A178W8P4]
AT5G17720	BDG5	Probable lysophospholipase BODYGUARD 5 [Source:UniProtKB/Swiss-Prot;Acc:Q9FN79]
AT3G20360		AT3g20360/MQC12_11 [Source:UniProtKB/TrEMBL;Acc:Q8W0Z1]
AT4G10530		Subtilase family protein [Source:TAIR;Acc:AT4G10530]
AT4G11480	CRK32	Putative cysteine-rich receptor-like protein kinase 32 [Source:UniProtKB/Swiss-Prot;Acc:Q9LDS6]
AT3G23120	AtRLP38	Receptor-like protein 38 [Source:UniProtKB/Swiss-Prot;Acc:Q9LS79]
AT1G01060	LHY	LHY1 [Source:UniProtKB/TrEMBL;Acc:A0A178W761]
AT4G22710	CYP706A2	Cytochrome P450 - like protein [Source:UniProtKB/TrEMBL;Acc:O49652]
AT4G37220		Cold-regulated 413 plasma membrane protein 4 [Source:UniProtKB/Swiss-Prot;Acc:O23164]
AT1G51920		unknown protein; FUNCTIONS IN: molecular_function unknown; INVOLVED IN: biological_process unknown; LOCATED IN: endomembrane system; EXPRESSED IN: stem, stamen; EXPRESSED DURING: 4 anthesis; Ha. [Source:TAIR;Acc:AT1G51920]
AT3G54450	NPF5.4	Protein NRT1/ PTR FAMILY 5.4 [Source:UniProtKB/Swiss-Prot;Acc:Q9M1I2]
AT4G39830		At4g39830 [Source:UniProtKB/TrEMBL;Acc:O65670]
AT4G11390		Cysteine/Histidine-rich C1 domain family protein [Source:TAIR;Acc:AT4G11390]
AT2G44290	YLS3	Protein YLS3 [Source:UniProtKB/Swiss-Prot;Acc:O64864]
AT5G39580	PER62	Peroxidase 62 [Source:UniProtKB/Swiss-Prot;Acc:Q9FKA4]
AT5G37490	PUB21	U-box domain-containing protein 21 [Source:UniProtKB/Swiss-Prot;Acc:Q5PNY6]
AT3G13433		Transmembrane protein [Source:UniProtKB/TrEMBL;Acc:F4JDB5]
AT4G16820	PLA-I{beta]2	Phospholipase A1-Ibeta2, chloroplastic [Source:UniProtKB/Swiss-Prot;Acc:O23522]
AT1G64160	DIR5	Dirigent protein 5 [Source:UniProtKB/Swiss-Prot;Acc:Q9SH66]
AT3G52748		other RNA [Source:TAIR;Acc:AT3G52748]
AT4G18390	TCP2	Transcription factor TCP2 [Source:UniProtKB/Swiss-Prot;Acc:Q93V43]
AT5G06900	CYP93D1	Cytochrome P450, family 93, subfamily D, polypeptide 1 [Source:UniProtKB/TrEMBL;Acc:Q9FL56]
AT4G10860		F8M12.2 protein [Source:UniProtKB/TrEMBL;Acc:O81627]
AT4G11230	RBOHI	Probable respiratory burst oxidase homolog protein I [Source:UniProtKB/Swiss-Prot;Acc:Q9SUT8]
AT5G64750	ABR1	Ethylene-responsive transcription factor ABR1 [Source:UniProtKB/Swiss-Prot;Acc:Q9FGF8]
AT2G03600	ATUPS3	Ureide permease 3 [Source:UniProtKB/TrEMBL;Acc:F4IT87]
AT3G54500		BEST Arabidopsis thaliana protein match is: dentin sialophosphoprotein-related (TAIR:AT5G64170.1); Ha. [Source:TAIR;Acc:AT3G54500]
AT4G01700		At4g01700 [Source:UniProtKB/TrEMBL;Acc:Q9ZSI6]
AT1G01680	PUB54	U-box domain-containing protein 54 [Source:UniProtKB/Swiss-Prot;Acc:Q9LQ92]
AT5G24210		Alpha/beta-Hydrolases superfamily protein [Source:UniProtKB/TrEMBL;Acc:Q9FNG1]
AT1G55230		Proteinase inhibitor I4, serpin (DUF716) [Source:UniProtKB/TrEMBL;Acc:Q9C893]
AT3G05155		Major facilitator superfamily protein [Source:TAIR;Acc:AT3G05155]
AT5G22520		At5g22520 [Source:UniProtKB/TrEMBL;Acc:Q9FK87]
AT2G18660	EGC2	EG45-like domain containing protein 2 [Source:UniProtKB/Swiss-Prot;Acc:Q9ZV52]
AT5G39120		Germin-like protein subfamily 1 member 15 [Source:UniProtKB/Swiss-Prot;Acc:Q9FIC9]
AT2G43000	JUB1	Transcription factor JUNGBRUNNEN 1 [Source:UniProtKB/Swiss-Prot;Acc:Q9SK55]
AT5G47850	CCR4	Serine/threonine-protein kinase-like protein CCR4 [Source:UniProtKB/Swiss-Prot;Acc:Q9FIJ6]
AT1G49030	PCR6	Protein PLANT CADMIUM RESISTANCE 6 [Source:UniProtKB/Swiss-Prot;Acc:Q9M9A5]
AT4G28410		Tyrosine transaminase family protein [Source:UniProtKB/TrEMBL;Acc:F4JL94]
AT5G60350		unknown protein; Ha. [Source:TAIR;Acc:AT5G60350]
AT4G03480		Ankyrin repeat family protein [Source:UniProtKB/TrEMBL;Acc:F4JG86]
AT5G52670		Copper transport protein family [Source:UniProtKB/TrEMBL;Acc:Q9LTF0]
AT3G55790		Transmembrane protein [Source:UniProtKB/TrEMBL;Acc:Q9M045]
AT4G28620	ABCB24	ABC transporter B family member 24, mitochondrial [Source:UniProtKB/Swiss-Prot;Acc:Q9M0G9]
AT4G11880	AGL14	Agamous-like MADS-box protein AGL14 [Source:UniProtKB/Swiss-Prot;Acc:Q38838]
AT4G15400	BIA1	BAHD acyltransferase BIA1 [Source:UniProtKB/Swiss-Prot;Acc:O23393]
AT1G52800		2-oxoglutarate (2OG) and Fe(II)-dependent oxygenase superfamily protein [Source:UniProtKB/TrEMBL;Acc:Q9C938]
AT3G54150		Embryonic abundant protein-like [Source:UniProtKB/TrEMBL;Acc:Q9M389]
AT1G76470		NAD(P)-binding Rossmann-fold superfamily protein [Source:UniProtKB/TrEMBL;Acc:F4I2E5]
AT4G22950	AGL19	Agamous-like MADS-box protein AGL19 [Source:UniProtKB/Swiss-Prot;Acc:O82743]
AT4G09110	ATL35	Putative RING-H2 finger protein ATL35 [Source:UniProtKB/Swiss-Prot;Acc:Q9M0R6]
AT1G61230		Mannose-binding lectin superfamily protein [Source:UniProtKB/TrEMBL;Acc:F4HTI1]
AT5G06730	PER54	Peroxidase 54 [Source:UniProtKB/Swiss-Prot;Acc:Q9FG34]
AT1G72940		At1g72940/F3N23_14 [Source:UniProtKB/TrEMBL;Acc:Q9SSN2]
AT5G11210	GLR2.5	Glutamate receptor 2.5 [Source:UniProtKB/Swiss-Prot;Acc:Q9LFN5]
AT2G37700		Fatty acid hydroxylase superfamily [Source:TAIR;Acc:AT2G37700]
AT1G09080	MED37B	Probable mediator of RNA polymerase II transcription subunit 37b [Source:UniProtKB/Swiss-Prot;Acc:Q8H1B3]
AT2G01300		Mediator of RNA polymerase II transcription subunit [Source:UniProtKB/TrEMBL;Acc:Q9ZU37]
AT1G14580		C2H2-like zinc finger protein [Source:TAIR;Acc:AT1G14580]
AT2G23170	GH3.3	Indole-3-acetic acid-amido synthetase GH3.3 [Source:UniProtKB/Swiss-Prot;Acc:O22190]
AT4G15330	CYP705A1	Cytochrome P450 705A1 [Source:UniProtKB/Swiss-Prot;Acc:Q0WQ07]
AT3G46190		TRAF-like family protein [Source:UniProtKB/TrEMBL;Acc:A0A1I9LN71]
AT1G43140		Putative cullin-like protein 1 [Source:UniProtKB/Swiss-Prot;Acc:P0CH31]
AT2G13810	ALD1	EDTS5 [Source:UniProtKB/TrEMBL;Acc:A0A178VQ02]
AT4G38390	RHS17	RHS17 [Source:UniProtKB/TrEMBL;Acc:A0A178V2M6]
AT5G62330		BEST Arabidopsis thaliana protein match is: Plant invertase/pectin methylesterase inhibitor superfamily protein (TAIR:AT5G62340.1); Ha. [Source:TAIR;Acc:AT5G62330]
AT4G15990		Uncharacterized protein AT4g15990 [Source:UniProtKB/TrEMBL;Acc:O23448]
AT3G55720		Replication factor C subunit, putative (DUF620) [Source:UniProtKB/TrEMBL;Acc:Q9M050]
AT1G44130		Eukaryotic aspartyl protease family protein [Source:UniProtKB/TrEMBL;Acc:Q9C6Y5]
AT2G39530		CASP-like protein 4D1 [Source:UniProtKB/Swiss-Prot;Acc:Q8GWD5]
AT5G39610	NAC92	NAC domain-containing protein 92 [Source:UniProtKB/Swiss-Prot;Acc:Q9FKA0]
AT5G18910		At5g18910 [Source:UniProtKB/TrEMBL;Acc:Q8GXZ5]
AT3G50470	HR3	MLA10 [Source:UniProtKB/TrEMBL;Acc:A0A178VJG9]
AT1G13520		At1g13520 [Source:UniProtKB/TrEMBL;Acc:Q6NNH1]
AT4G35180	LHT7	Lysine histidine transporter-like 7 [Source:UniProtKB/Swiss-Prot;Acc:Q84WE9]
AT5G19880	PER58	Peroxidase 58 [Source:UniProtKB/Swiss-Prot;Acc:P59120]
AT5G42380	CML37	Calcium-binding protein CML37 [Source:UniProtKB/Swiss-Prot;Acc:Q9FIH9]
AT3G14225	GLIP4	GDSL esterase/lipase 4 [Source:UniProtKB/Swiss-Prot;Acc:Q9LJP1]
AT1G49570	PER10	Peroxidase [Source:UniProtKB/TrEMBL;Acc:A0A178WK78]
AT5G41750		Disease resistance protein (TIR-NBS-LRR class) family [Source:UniProtKB/TrEMBL;Acc:Q9LSX5]
AT3G47480	CML47	Probable calcium-binding protein CML47 [Source:UniProtKB/Swiss-Prot;Acc:Q9SN89]
AT5G48540	CRRSP55	Cysteine-rich repeat secretory protein 55 [Source:UniProtKB/Swiss-Prot;Acc:Q9LV60]
AT3G29000	CML45	Probable calcium-binding protein CML45 [Source:UniProtKB/Swiss-Prot;Acc:Q9MBG5]
AT3G02100	UGT83A1	UDP-glycosyltransferase 83A1 [Source:UniProtKB/Swiss-Prot;Acc:Q9SGA8]
AT2G39400		Alpha/beta-Hydrolases superfamily protein [Source:UniProtKB/TrEMBL;Acc:O80627]
AT1G32350	AOX3	AOX1D [Source:UniProtKB/TrEMBL;Acc:A0A384LFI3]
AT4G19370		Chitin synthase, putative (DUF1218) [Source:UniProtKB/TrEMBL;Acc:O65708]
AT1G21120		O-methyltransferase family protein [Source:TAIR;Acc:AT1G21120]
AT2G44578		RING/U-box superfamily protein [Source:UniProtKB/TrEMBL;Acc:A8MS73]
AT5G52760	HIPP14	Heavy metal-associated isoprenylated plant protein 14 [Source:UniProtKB/Swiss-Prot;Acc:Q9LTE1]
AT1G66020	TPS26	Terpenoid synthase 26 [Source:UniProtKB/Swiss-Prot;Acc:Q9C8E3]
AT3G28930	AIG2A	Protein AIG2 A [Source:UniProtKB/Swiss-Prot;Acc:P54121]
AT2G20142		Toll-Interleukin-Resistance (TIR) domain family protein [Source:UniProtKB/TrEMBL;Acc:F4IUF0]
AT1G03660		Ankyrin-repeat containing protein [Source:UniProtKB/TrEMBL;Acc:F4I2G0]
AT2G02010	GAD4	glutamate decarboxylase 4 [Source:TAIR;Acc:AT2G02010]
AT1G13480		At1g13480 [Source:UniProtKB/TrEMBL;Acc:Q56Y29]
AT2G29460	GSTU4	Glutathione S-transferase U4 [Source:UniProtKB/Swiss-Prot;Acc:Q9ZW27]
AT1G53700	WAG1	Serine/threonine-protein kinase WAG1 [Source:UniProtKB/Swiss-Prot;Acc:Q9C8M5]
AT2G43510	ATTI1	TI1 [Source:UniProtKB/TrEMBL;Acc:A0A178VRC4]
AT4G11170		Putative disease resistance protein At4g11170 [Source:UniProtKB/Swiss-Prot;Acc:O82500]
AT1G58420		At1g58420 [Source:UniProtKB/TrEMBL;Acc:Q9C647]
AT3G18450	PCR5	Protein PLANT CADMIUM RESISTANCE 5 [Source:UniProtKB/Swiss-Prot;Acc:Q9LS45]
AT2G45760	BAP2	BON1-associated protein 2 [Source:UniProtKB/Swiss-Prot;Acc:Q58FX0]
AT3G26820		Esterase/lipase/thioesterase family protein [Source:UniProtKB/TrEMBL;Acc:F4JDQ6]
AT2G32487		unknown protein; FUNCTIONS IN: molecular_function unknown; INVOLVED IN: biological_process unknown; LOCATED IN: endomembrane system; Ha. [Source:TAIR;Acc:AT2G32487]
AT5G13330	ERF113	Rap2.6L [Source:UniProtKB/TrEMBL;Acc:A0A178UKL8]
AT4G15740		Calcium-dependent lipid-binding (CaLB domain) family protein [Source:UniProtKB/TrEMBL;Acc:O23425]
AT5G26070		Hydroxyproline-rich glycoprotein family protein [Source:UniProtKB/TrEMBL;Acc:Q4PSE5]
AT5G64870	FLOT3	Flotillin-like protein 3 [Source:UniProtKB/Swiss-Prot;Acc:Q9LV90]
AT1G44020		Cysteine/Histidine-rich C1 domain family protein [Source:UniProtKB/TrEMBL;Acc:F4IEE1]
AT1G68040		Putative S-adenosyl-L-methionine:salicylic acid carboxyl methyltransferase; 41514-39166 [Source:UniProtKB/TrEMBL;Acc:Q9C9W8]
AT2G32210		Cysteine-rich/transmembrane domain A-like protein [Source:UniProtKB/TrEMBL;Acc:Q9SKX9]
AT3G11390		Cysteine/Histidine-rich C1 domain family protein [Source:UniProtKB/TrEMBL;Acc:Q9CAY5]
AT1G35210		Uncharacterized protein T32G9.25 [Source:UniProtKB/TrEMBL;Acc:Q9C6F2]
AT1G72920		Similar to part of disease resistance protein [Source:UniProtKB/TrEMBL;Acc:Q9SSN4]
AT3G27490		Cysteine/Histidine-rich C1 domain family protein [Source:UniProtKB/TrEMBL;Acc:Q9LT63]
AT5G43120		ARM-repeat/Tetratricopeptide repeat (TPR)-like protein [Source:TAIR;Acc:AT5G43120]
AT2G32190		Cysteine-rich/transmembrane domain A-like protein [Source:UniProtKB/TrEMBL;Acc:Q9SKY1]
AT1G28600		GDSL esterase/lipase At1g28600 [Source:UniProtKB/Swiss-Prot;Acc:Q94F40]
AT3G01990	ACR6	ACT domain repeat 6 [Source:UniProtKB/TrEMBL;Acc:A0A1I9LSD7]
AT1G71140	DTX14	Protein DETOXIFICATION 14 [Source:UniProtKB/Swiss-Prot;Acc:Q9C994]
AT3G53160	UGT73C7	Glycosyltransferase (Fragment) [Source:UniProtKB/TrEMBL;Acc:W8Q326]
AT1G53610		Transmembrane protein [Source:UniProtKB/TrEMBL;Acc:Q9C8L7]
AT4G20210	TPS08	Terpenoid synthase 8 [Source:UniProtKB/Swiss-Prot;Acc:O65435]
AT5G54710		Ankyrin repeat family protein [Source:TAIR;Acc:AT5G54710]
AT3G28580		AAA-ATPase At3g28580 [Source:UniProtKB/Swiss-Prot;Acc:Q9LJJ7]
AT5G40010	AATP1	AAA-ATPase ASD, mitochondrial [Source:UniProtKB/Swiss-Prot;Acc:Q9FLD5]
AT5G39110		Germin-like protein subfamily 1 member 14 [Source:UniProtKB/Swiss-Prot;Acc:Q9FID0]
AT1G76650	CML38	CML38 [Source:UniProtKB/TrEMBL;Acc:A0A178WMC5]
AT1G69920	GSTU12	Glutathione S-transferase U12 [Source:UniProtKB/Swiss-Prot;Acc:Q6NMS0]
AT1G61840		Cysteine/Histidine-rich C1 domain family protein [Source:UniProtKB/TrEMBL;Acc:O80692]
AT3G46130	ATMYB48	myb domain protein 48 [Source:TAIR;Acc:AT3G46130]
AT3G01080	WRKY58	WRKY DNA-binding protein 58 [Source:UniProtKB/TrEMBL;Acc:A0A1I9LLS8]
AT3G30260	AGL79	AGAMOUS-like 79 [Source:UniProtKB/TrEMBL;Acc:Q7X9H6]
AT3G52780	PAP20	Probable purple acid phosphatase 20 [Source:UniProtKB/Swiss-Prot;Acc:Q9LXI7]
AT1G02930	GSTF6	Glutathione S-transferase F6 [Source:UniProtKB/Swiss-Prot;Acc:P42760]
AT5G48850	SDI1	ATSDI1 [Source:UniProtKB/TrEMBL;Acc:A0A178UKA2]
AT5G39190	GLP5A	Germin-like protein subfamily 1 member 20 [Source:UniProtKB/Swiss-Prot;Acc:P92996]
AT4G39580		F-box/kelch-repeat protein At4g39580 [Source:UniProtKB/Swiss-Prot;Acc:Q9SVA0]
AT1G19250	FMO1	Probable flavin-containing monooxygenase 1 [Source:UniProtKB/Swiss-Prot;Acc:Q9LMA1]
AT1G21326		F16F4.1 protein [Source:UniProtKB/TrEMBL;Acc:Q9LMP5]
AT1G44050		Cysteine/Histidine-rich C1 domain family protein [Source:UniProtKB/TrEMBL;Acc:Q9LNZ0]
AT4G37050	PLP3	Patatin-like protein 3 [Source:UniProtKB/Swiss-Prot;Acc:O23181]
AT5G06980		unknown protein; BEST Arabidopsis thaliana protein match is: unknown protein (TAIR:AT3G12320.1); Ha. [Source:TAIR;Acc:AT5G06980]
AT3G17690	CNGC19	Putative cyclic nucleotide-gated ion channel 19 [Source:UniProtKB/Swiss-Prot;Acc:Q9LDR2]
AT1G63570		Receptor-like protein kinase-related family protein [Source:TAIR;Acc:AT1G63570]
AT3G12230	SCPL14	Serine carboxypeptidase-like 14 [Source:UniProtKB/Swiss-Prot;Acc:Q9C7D3]
AT4G14365	XBAT34	Putative E3 ubiquitin-protein ligase XBAT34 [Source:UniProtKB/Swiss-Prot;Acc:Q9FPH0]
AT2G14210	ANR1	AGAMOUS-like 44 [Source:TAIR;Acc:AT2G14210]
AT2G19190	SIRK	Senescence-induced receptor-like serine/threonine-protein kinase [Source:UniProtKB/Swiss-Prot;Acc:O64483]
AT1G14540	PER4	Peroxidase [Source:UniProtKB/TrEMBL;Acc:A0A178WND9]
AT1G34520		Probable long-chain-alcohol O-fatty-acyltransferase 8 [Source:UniProtKB/Swiss-Prot;Acc:Q9LNL1]
AT5G40990	GLIP1	GDSL esterase/lipase 1 [Source:UniProtKB/Swiss-Prot;Acc:Q9FLN0]
AT4G03440		Ankyrin repeat family protein [Source:UniProtKB/TrEMBL;Acc:Q9ZT72]
AT5G19890	PER59	Peroxidase 59 [Source:UniProtKB/Swiss-Prot;Acc:Q39034]
AT1G26380	FOX1	Berberine bridge enzyme-like 3 [Source:UniProtKB/Swiss-Prot;Acc:Q9FZC4]
AT1G33320	CGS2	Probable cystathionine gamma-synthase 2 [Source:UniProtKB/Swiss-Prot;Acc:Q9C876]
AT3G47040		Glycosyl hydrolase family protein [Source:UniProtKB/TrEMBL;Acc:F4JAB7]
AT1G21520		Uncharacterized protein At1g21520/F24J8_4 [Source:UniProtKB/TrEMBL;Acc:Q8GYE6]
AT1G01560	MPK11	Mitogen-activated protein kinase 11 [Source:UniProtKB/Swiss-Prot;Acc:Q9LMM5]
AT1G57630		Disease resistance protein RPP1-WsB, putative [Source:UniProtKB/TrEMBL;Acc:Q9FVT9]
AT5G64810	WRKY51	Probable WRKY transcription factor 51 [Source:UniProtKB/Swiss-Prot;Acc:Q93WU9]
AT5G43520		Cysteine/Histidine-rich C1 domain family protein [Source:UniProtKB/TrEMBL;Acc:Q9FIY8]
AT1G16150	WAKL4	Wall-associated receptor kinase-like 4 [Source:UniProtKB/Swiss-Prot;Acc:Q9S9M2]
AT2G41100	CML12	Calmodulin-like protein 12 [Source:UniProtKB/Swiss-Prot;Acc:P25071]
AT1G76430	PHT1-9	Putative phosphate transporter [Source:UniProtKB/TrEMBL;Acc:Q0WRM8]
AT5G48400	GLR1.2	Glutamate receptor 1.2 [Source:UniProtKB/Swiss-Prot;Acc:Q9LV72]
AT4G37235		CASP-like protein [Source:UniProtKB/TrEMBL;Acc:A0A178UV86]
AT4G37370	CYP81D8	Cytochrome P450, family 81, subfamily D, polypeptide 8 [Source:UniProtKB/TrEMBL;Acc:Q9SZT7]
AT3G04070	NAC047	NAC transcription factor 47 [Source:UniProtKB/Swiss-Prot;Acc:Q84TD6]
AT3G46400		Leucine-rich repeat protein kinase family protein [Source:UniProtKB/TrEMBL;Acc:F4J927]
AT2G04515		Transmembrane protein [Source:UniProtKB/TrEMBL;Acc:Q5S4Y8]
AT4G37290	PIP2	unknown protein; FUNCTIONS IN: molecular_function unknown; INVOLVED IN: response to karrikin; LOCATED IN: endomembrane system; EXPRESSED IN: cotyledon, hypocotyl, leaf; EXPRESSED DURING: LP.04 four leaves visible; BEST Arabidopsis thaliana protein m /.../s: unknown protein (TAIR:AT2G23270.1); Ha. [Source:TAIR;Acc:AT4G37290]
AT2G36110		Polynucleotidyl transferase, ribonuclease H-like superfamily protein [Source:UniProtKB/TrEMBL;Acc:Q9SIH3]
AT4G18990	XTH29	Probable xyloglucan endotransglucosylase/hydrolase protein 29 [Source:UniProtKB/Swiss-Prot;Acc:Q8L7H3]
AT3G14370	WAG2	WAG2 [Source:UniProtKB/TrEMBL;Acc:A0A178VAK4]
AT4G26380		Cysteine/Histidine-rich C1 domain family protein [Source:UniProtKB/TrEMBL;Acc:O65596]
AT2G31540		GDSL esterase/lipase At2g31540 [Source:UniProtKB/Swiss-Prot;Acc:Q9SIQ3]
AT5G26080		Proline-rich family protein [Source:UniProtKB/TrEMBL;Acc:Q3E939]
AT2G44220		Protein of Unknown Function (DUF239) [Source:TAIR;Acc:AT2G44220]
AT1G20860	PHT1;8	phosphate transporter 1;8 [Source:TAIR;Acc:AT1G20860]
AT2G46830	CCA1	Protein CCA1 [Source:UniProtKB/Swiss-Prot;Acc:P92973]
AT3G23250	MYB15	Transcription factor MYB15 [Source:UniProtKB/Swiss-Prot;Acc:Q9LTC4]
AT1G29600		Zinc finger C-x8-C-x5-C-x3-H type family protein [Source:TAIR;Acc:AT1G29600]
AT3G26830	CYP71B15	Bifunctional dihydrocamalexate synthase/camalexin synthase [Source:UniProtKB/Swiss-Prot;Acc:Q9LW27]
AT1G21550	CML44	Probable calcium-binding protein CML44 [Source:UniProtKB/Swiss-Prot;Acc:Q9LPK5]
AT5G22530		Uncharacterized protein At5g22530 [Source:UniProtKB/TrEMBL;Acc:Q9FK86]
AT5G39130		Germin-like protein subfamily 1 member 16 [Source:UniProtKB/Swiss-Prot;Acc:Q9FIC8]
AT5G13320	PBS3	Auxin-responsive GH3 family protein [Source:TAIR;Acc:AT5G13320]
AT3G22910	ACA13	Putative calcium-transporting ATPase 13, plasma membrane-type [Source:UniProtKB/Swiss-Prot;Acc:Q9LIK7]
AT5G40000		AAA-ATPase At5g40000 [Source:UniProtKB/Swiss-Prot;Acc:F4KFX5]
AT5G52680		Copper transport protein family [Source:UniProtKB/TrEMBL;Acc:Q9LTE9]
AT5G36970	NHL25	NHL25 [Source:UniProtKB/TrEMBL;Acc:A0A178UFH9]
AT3G61390	PUB36	U-box domain-containing protein 36 [Source:UniProtKB/Swiss-Prot;Acc:Q8GZ84]
AT1G61750	CRRSP1	Cysteine-rich repeat secretory protein 1 [Source:UniProtKB/Swiss-Prot;Acc:Q9SYB1]
AT5G20710	BGAL7	Beta-galactosidase 7 [Source:UniProtKB/Swiss-Prot;Acc:Q9SCV5]
AT1G72930	TIR	Toll/interleukin-1 receptor-like protein [Source:UniProtKB/Swiss-Prot;Acc:Q9SSN3]
AT5G52720		Copper transport protein family [Source:TAIR;Acc:AT5G52720]
AT1G67000	LRK10L-2.8	LEAF RUST 10 DISEASE-RESISTANCE LOCUS RECEPTOR-LIKE PROTEIN KINASE-like 2.8 [Source:UniProtKB/Swiss-Prot;Acc:Q3ECH2]
AT3G47220	PLC9	Phosphoinositide phospholipase C 9 [Source:UniProtKB/Swiss-Prot;Acc:Q6NMA7]
AT5G24410	PGL4	Probable 6-phosphogluconolactonase 4 [Source:UniProtKB/Swiss-Prot;Acc:Q9FIN1]
AT5G59270		Concanavalin A-like lectin protein kinase family protein [Source:TAIR;Acc:AT5G59270]
AT1G63550	CRRSP9	Cysteine-rich repeat secretory protein 9 [Source:UniProtKB/Swiss-Prot;Acc:Q5Q0E2]
AT1G63750		Disease resistance protein (TIR-NBS-LRR class) family [Source:UniProtKB/TrEMBL;Acc:Q9CAE0]
AT1G09090	RBOHB	Respiratory burst oxidase homolog protein B [Source:UniProtKB/Swiss-Prot;Acc:Q9SBI0]
AT4G23980	ARF9	Auxin response factor 9 [Source:UniProtKB/Swiss-Prot;Acc:Q9XED8]
AT1G10340		Ankyrin repeat family protein [Source:UniProtKB/TrEMBL;Acc:Q9SY76]
AT2G20100		basic helix-loop-helix (bHLH) DNA-binding superfamily protein [Source:TAIR;Acc:AT2G20100]
AT1G09932		Phosphoglycerate mutase family protein [Source:UniProtKB/TrEMBL;Acc:Q8GWG7]
AT1G43910		AAA-ATPase At1g43910 [Source:UniProtKB/Swiss-Prot;Acc:Q9LP11]
AT4G08250	SCL26	Scarecrow-like protein 26 [Source:UniProtKB/Swiss-Prot;Acc:Q9SUF5]
AT2G19410		U-box domain-containing protein kinase family protein [Source:TAIR;Acc:AT2G19410]
AT2G04040	DTX1	Protein DETOXIFICATION [Source:UniProtKB/TrEMBL;Acc:A0A178VPK7]
AT2G25150	SCT	Spermidine coumaroyl-CoA acyltransferase [Source:UniProtKB/Swiss-Prot;Acc:Q8GYW8]
AT1G24320	GCS2	Alpha-glucosidase 2 [Source:UniProtKB/Swiss-Prot;Acc:Q84M89]
AT5G19110		Eukaryotic aspartyl protease family protein [Source:TAIR;Acc:AT5G19110]
AT5G05390	LAC12	Laccase-12 [Source:UniProtKB/Swiss-Prot;Acc:Q9FLB5]
AT1G07460		Concanavalin A-like lectin family protein [Source:UniProtKB/TrEMBL;Acc:Q9LNW6]
AT1G57650		ATP binding protein [Source:UniProtKB/TrEMBL;Acc:F4I847]
AT5G44582		unknown protein; FUNCTIONS IN: molecular_function unknown; INVOLVED IN: biological_process unknown; LOCATED IN: endomembrane system; BEST Arabidopsis thaliana protein match is: unknown protein (TAIR:AT5G44580.1); Ha. [Source:TAIR;Acc:AT5G44582]
AT1G69930	GSTU11	Glutathione S-transferase U11 [Source:UniProtKB/Swiss-Prot;Acc:Q9CAS6]
AT3G46080	ZAT8	Zinc finger protein ZAT8 [Source:UniProtKB/Swiss-Prot;Acc:Q9LX85]
AT3G50930	HSR4	Protein HYPER-SENSITIVITY-RELATED 4 [Source:UniProtKB/Swiss-Prot;Acc:Q8VZG2]
AT3G02840		ARM repeat superfamily protein [Source:UniProtKB/TrEMBL;Acc:Q9M8S5]
AT5G39180		Germin-like protein subfamily 1 member 19 [Source:UniProtKB/Swiss-Prot;Acc:Q9FL89]
AT3G28210	SAP12	Zinc finger AN1 domain-containing stress-associated protein 12 [Source:UniProtKB/Swiss-Prot;Acc:Q67YE6]
AT1G66090		Disease resistance protein (TIR-NBS class) [Source:UniProtKB/TrEMBL;Acc:Q9C515]
AT5G41740		Disease resistance protein (TIR-NBS-LRR class) family [Source:UniProtKB/TrEMBL;Acc:F4JYI4]
AT1G79680	WAKL10	Wall-associated receptor kinase-like 10 [Source:UniProtKB/Swiss-Prot;Acc:Q8VYA3]
AT5G44990		Glutathione S-transferase family protein [Source:UniProtKB/TrEMBL;Acc:Q9FL98]
AT3G51570		Disease resistance protein (TIR-NBS-LRR class) family [Source:UniProtKB/TrEMBL;Acc:Q9SCZ2]
AT1G65500		F5I14.4 protein [Source:UniProtKB/TrEMBL;Acc:O04468]
AT1G33030		At1g33030/F9L11_18 [Source:UniProtKB/TrEMBL;Acc:Q9MAP0]
AT2G41240	BHLH100	BHLH100 [Source:UniProtKB/TrEMBL;Acc:A0A384LFW4]
AT4G09130	ATL37	Putative RING-H2 finger protein ATL37 [Source:UniProtKB/Swiss-Prot;Acc:Q9M0R4]
AT1G51913		Putative uncharacterized protein [Source:UniProtKB/TrEMBL;Acc:Q1G3Z2]
AT4G24150	GRF8	Growth-regulating factor 8 [Source:UniProtKB/Swiss-Prot;Acc:Q9SU44]
AT1G04610	YUC3	Probable indole-3-pyruvate monooxygenase YUCCA3 [Source:UniProtKB/Swiss-Prot;Acc:O23024]
AT3G52970	CYP76G1	Cytochrome P450, family 76, subfamily G, polypeptide 1 [Source:UniProtKB/TrEMBL;Acc:F4J865]
AT2G38860	DJ1E	DJ-1 protein homolog E [Source:UniProtKB/Swiss-Prot;Acc:Q9ZV19]
AT1G14550	PER5	Peroxidase 5 [Source:UniProtKB/Swiss-Prot;Acc:Q9M9Q9]
AT4G26120		Ankyrin repeat family protein / BTB/POZ domain-containing protein [Source:TAIR;Acc:AT4G26120]
AT3G50140		Transmembrane protein, putative (DUF247) [Source:UniProtKB/TrEMBL;Acc:F4IZB4]
AT2G17040	anac036	NAC domain containing protein 36 [Source:UniProtKB/TrEMBL;Acc:F4IME8]
AT2G40750	WRKY54	Probable WRKY transcription factor 54 [Source:UniProtKB/Swiss-Prot;Acc:Q93WU8]
AT3G32047		Cytochrome P450 superfamily protein [Source:UniProtKB/TrEMBL;Acc:F4JA71]
AT5G46370	TPK2	KCO2 [Source:UniProtKB/TrEMBL;Acc:A0A178UQZ6]
AT3G18250		Putative membrane lipoprotein [Source:UniProtKB/TrEMBL;Acc:Q6E248]
AT3G53040		Late embryogenesis abundant protein At3g53040 [Source:UniProtKB/Swiss-Prot;Acc:Q9LF88]
AT2G29350	SAG13	SAG13 [Source:UniProtKB/TrEMBL;Acc:A0A178VTS8]
AT2G27402		At2g27402 [Source:UniProtKB/TrEMBL;Acc:Q8GX30]
AT5G37840		At5g37840 [Source:UniProtKB/TrEMBL;Acc:Q6NL13]
Reference：Silva-Navas, J., M. A. Moreno-Risueno, C. Manzano, B. Tellez-Robledo, S. Navarro-Neila, V. Carrasco, S. Pollmann, F. J. Gallego and J. C. Del Pozo (2016). "Flavonols Mediate Root Phototropism and Growth through Regulation of Proliferation-to-Differentiation Transition." Plant Cell 28(6): 1372-1387.

## Sheet: Common regulated genes
Expression changes of genes in roots of seedlings in illumination comparing with those in covered condition (WT-Dark/WT-Light)
ProbeID	Gene name	Gene descriptions	Up-Down-Regulation (WT-Dark/WT-Light)
AT1G03010		BTB/POZ domain-containing protein At1g03010 [Source:UniProtKB/Swiss-Prot;Acc:Q9SA69]	Up
AT3G29410	TPS25	Terpenoid synthase 25 [Source:UniProtKB/Swiss-Prot;Acc:Q9LIA1]	Up
AT2G32160		AT2G32160 protein [Source:UniProtKB/TrEMBL;Acc:B3H6T0]	Up
AT1G62280	SLAH1	SLAH1 [Source:UniProtKB/TrEMBL;Acc:A0A178W8P4]	Up
AT5G17720	BDG5	Probable lysophospholipase BODYGUARD 5 [Source:UniProtKB/Swiss-Prot;Acc:Q9FN79]	Up
AT3G20360		AT3g20360/MQC12_11 [Source:UniProtKB/TrEMBL;Acc:Q8W0Z1]	Up
AT4G10530		Subtilase family protein [Source:TAIR;Acc:AT4G10530]	Up
AT1G01060	LHY	LHY1 [Source:UniProtKB/TrEMBL;Acc:A0A178W761]	Up
AT4G37220		Cold-regulated 413 plasma membrane protein 4 [Source:UniProtKB/Swiss-Prot;Acc:O23164]	Up
AT3G54450	NPF5.4	Protein NRT1/ PTR FAMILY 5.4 [Source:UniProtKB/Swiss-Prot;Acc:Q9M1I2]	Up
AT4G11390		Cysteine/Histidine-rich C1 domain family protein [Source:TAIR;Acc:AT4G11390]	Up
AT4G18390	TCP2	Transcription factor TCP2 [Source:UniProtKB/Swiss-Prot;Acc:Q93V43]	Up
AT5G06900	CYP93D1	Cytochrome P450, family 93, subfamily D, polypeptide 1 [Source:UniProtKB/TrEMBL;Acc:Q9FL56]	Up
AT4G11230	RBOHI	Probable respiratory burst oxidase homolog protein I [Source:UniProtKB/Swiss-Prot;Acc:Q9SUT8]	Up
AT2G03600	ATUPS3	Ureide permease 3 [Source:UniProtKB/TrEMBL;Acc:F4IT87]	Up
AT3G54500		BEST Arabidopsis thaliana protein match is: dentin sialophosphoprotein-related (TAIR:AT5G64170.1); Ha. [Source:TAIR;Acc:AT3G54500]	Up
AT1G55230		Proteinase inhibitor I4, serpin (DUF716) [Source:UniProtKB/TrEMBL;Acc:Q9C893]	Up
AT3G05155		Major facilitator superfamily protein [Source:TAIR;Acc:AT3G05155]	Up
AT1G49030	PCR6	Protein PLANT CADMIUM RESISTANCE 6 [Source:UniProtKB/Swiss-Prot;Acc:Q9M9A5]	Up
AT4G28410		Tyrosine transaminase family protein [Source:UniProtKB/TrEMBL;Acc:F4JL94]	Up
AT4G03480		Ankyrin repeat family protein [Source:UniProtKB/TrEMBL;Acc:F4JG86]	Up
AT3G55790		Transmembrane protein [Source:UniProtKB/TrEMBL;Acc:Q9M045]	Up
AT4G28620	ABCB24	ABC transporter B family member 24, mitochondrial [Source:UniProtKB/Swiss-Prot;Acc:Q9M0G9]	Up
AT4G11880	AGL14	Agamous-like MADS-box protein AGL14 [Source:UniProtKB/Swiss-Prot;Acc:Q38838]	Up
AT4G15400	BIA1	BAHD acyltransferase BIA1 [Source:UniProtKB/Swiss-Prot;Acc:O23393]	Up
AT1G52800		2-oxoglutarate (2OG) and Fe(II)-dependent oxygenase superfamily protein [Source:UniProtKB/TrEMBL;Acc:Q9C938]	Up
AT4G22950	AGL19	Agamous-like MADS-box protein AGL19 [Source:UniProtKB/Swiss-Prot;Acc:O82743]	Up
AT4G09110	ATL35	Putative RING-H2 finger protein ATL35 [Source:UniProtKB/Swiss-Prot;Acc:Q9M0R6]	Up
AT1G61230		Mannose-binding lectin superfamily protein [Source:UniProtKB/TrEMBL;Acc:F4HTI1]	Up
AT2G37700		Fatty acid hydroxylase superfamily [Source:TAIR;Acc:AT2G37700]	Up
AT1G14580		C2H2-like zinc finger protein [Source:TAIR;Acc:AT1G14580]	Up
AT4G15330	CYP705A1	Cytochrome P450 705A1 [Source:UniProtKB/Swiss-Prot;Acc:Q0WQ07]	Up
AT3G46190		TRAF-like family protein [Source:UniProtKB/TrEMBL;Acc:A0A1I9LN71]	Up
AT1G43140		Putative cullin-like protein 1 [Source:UniProtKB/Swiss-Prot;Acc:P0CH31]	Up
AT2G13810	ALD1	EDTS5 [Source:UniProtKB/TrEMBL;Acc:A0A178VQ02]	Up
AT4G38390	RHS17	RHS17 [Source:UniProtKB/TrEMBL;Acc:A0A178V2M6]	Up
AT5G62330		BEST Arabidopsis thaliana protein match is: Plant invertase/pectin methylesterase inhibitor superfamily protein (TAIR:AT5G62340.1); Ha. [Source:TAIR;Acc:AT5G62330]	Up
AT4G15990		Uncharacterized protein AT4g15990 [Source:UniProtKB/TrEMBL;Acc:O23448]	Up
AT3G55720		Replication factor C subunit, putative (DUF620) [Source:UniProtKB/TrEMBL;Acc:Q9M050]	Up
AT2G39530		CASP-like protein 4D1 [Source:UniProtKB/Swiss-Prot;Acc:Q8GWD5]	Up
AT5G18910		At5g18910 [Source:UniProtKB/TrEMBL;Acc:Q8GXZ5]	Up
AT3G50470	HR3	MLA10 [Source:UniProtKB/TrEMBL;Acc:A0A178VJG9]	Up
AT3G14225	GLIP4	GDSL esterase/lipase 4 [Source:UniProtKB/Swiss-Prot;Acc:Q9LJP1]	Up
AT3G02100	UGT83A1	UDP-glycosyltransferase 83A1 [Source:UniProtKB/Swiss-Prot;Acc:Q9SGA8]	Up
AT4G19370		Chitin synthase, putative (DUF1218) [Source:UniProtKB/TrEMBL;Acc:O65708]	Up
AT1G66020	TPS26	Terpenoid synthase 26 [Source:UniProtKB/Swiss-Prot;Acc:Q9C8E3]	Up
AT1G03660		Ankyrin-repeat containing protein [Source:UniProtKB/TrEMBL;Acc:F4I2G0]	Up
AT1G53700	WAG1	Serine/threonine-protein kinase WAG1 [Source:UniProtKB/Swiss-Prot;Acc:Q9C8M5]	Up
AT3G18450	PCR5	Protein PLANT CADMIUM RESISTANCE 5 [Source:UniProtKB/Swiss-Prot;Acc:Q9LS45]	Up
AT4G15740		Calcium-dependent lipid-binding (CaLB domain) family protein [Source:UniProtKB/TrEMBL;Acc:O23425]	Up
AT5G26070		Hydroxyproline-rich glycoprotein family protein [Source:UniProtKB/TrEMBL;Acc:Q4PSE5]	Up
AT1G44020		Cysteine/Histidine-rich C1 domain family protein [Source:UniProtKB/TrEMBL;Acc:F4IEE1]	Up
AT1G68040		Putative S-adenosyl-L-methionine:salicylic acid carboxyl methyltransferase; 41514-39166 [Source:UniProtKB/TrEMBL;Acc:Q9C9W8]	Up
AT3G11390		Cysteine/Histidine-rich C1 domain family protein [Source:UniProtKB/TrEMBL;Acc:Q9CAY5]	Up
AT3G27490		Cysteine/Histidine-rich C1 domain family protein [Source:UniProtKB/TrEMBL;Acc:Q9LT63]	Up
AT5G43120		ARM-repeat/Tetratricopeptide repeat (TPR)-like protein [Source:TAIR;Acc:AT5G43120]	Up
AT1G53610		Transmembrane protein [Source:UniProtKB/TrEMBL;Acc:Q9C8L7]	Up
AT4G20210	TPS08	Terpenoid synthase 8 [Source:UniProtKB/Swiss-Prot;Acc:O65435]	Up
AT1G61840		Cysteine/Histidine-rich C1 domain family protein [Source:UniProtKB/TrEMBL;Acc:O80692]	Up
AT3G46130	ATMYB48	myb domain protein 48 [Source:TAIR;Acc:AT3G46130]	Up
AT3G01080	WRKY58	WRKY DNA-binding protein 58 [Source:UniProtKB/TrEMBL;Acc:A0A1I9LLS8]	Up
AT3G30260	AGL79	AGAMOUS-like 79 [Source:UniProtKB/TrEMBL;Acc:Q7X9H6]	Up
AT1G44050		Cysteine/Histidine-rich C1 domain family protein [Source:UniProtKB/TrEMBL;Acc:Q9LNZ0]	Up
AT4G37050	PLP3	Patatin-like protein 3 [Source:UniProtKB/Swiss-Prot;Acc:O23181]	Up
AT5G06980		unknown protein; BEST Arabidopsis thaliana protein match is: unknown protein (TAIR:AT3G12320.1); Ha. [Source:TAIR;Acc:AT5G06980]	Up
AT1G63570		Receptor-like protein kinase-related family protein [Source:TAIR;Acc:AT1G63570]	Up
AT2G14210	ANR1	AGAMOUS-like 44 [Source:TAIR;Acc:AT2G14210]	Up
AT1G34520		Probable long-chain-alcohol O-fatty-acyltransferase 8 [Source:UniProtKB/Swiss-Prot;Acc:Q9LNL1]	Up
AT4G03440		Ankyrin repeat family protein [Source:UniProtKB/TrEMBL;Acc:Q9ZT72]	Up
AT1G33320	CGS2	Probable cystathionine gamma-synthase 2 [Source:UniProtKB/Swiss-Prot;Acc:Q9C876]	Up
AT3G47040		Glycosyl hydrolase family protein [Source:UniProtKB/TrEMBL;Acc:F4JAB7]	Up
AT5G43520		Cysteine/Histidine-rich C1 domain family protein [Source:UniProtKB/TrEMBL;Acc:Q9FIY8]	Up
AT1G16150	WAKL4	Wall-associated receptor kinase-like 4 [Source:UniProtKB/Swiss-Prot;Acc:Q9S9M2]	Up
AT1G76430	PHT1-9	Putative phosphate transporter [Source:UniProtKB/TrEMBL;Acc:Q0WRM8]	Up
AT4G37235		CASP-like protein [Source:UniProtKB/TrEMBL;Acc:A0A178UV86]	Up
AT3G46400		Leucine-rich repeat protein kinase family protein [Source:UniProtKB/TrEMBL;Acc:F4J927]	Up
AT2G36110		Polynucleotidyl transferase, ribonuclease H-like superfamily protein [Source:UniProtKB/TrEMBL;Acc:Q9SIH3]	Up
AT3G14370	WAG2	WAG2 [Source:UniProtKB/TrEMBL;Acc:A0A178VAK4]	Up
AT4G26380		Cysteine/Histidine-rich C1 domain family protein [Source:UniProtKB/TrEMBL;Acc:O65596]	Up
AT2G31540		GDSL esterase/lipase At2g31540 [Source:UniProtKB/Swiss-Prot;Acc:Q9SIQ3]	Up
AT5G26080		Proline-rich family protein [Source:UniProtKB/TrEMBL;Acc:Q3E939]	Up
AT2G44220		Protein of Unknown Function (DUF239) [Source:TAIR;Acc:AT2G44220]	Up
AT1G20860	PHT1;8	phosphate transporter 1;8 [Source:TAIR;Acc:AT1G20860]	Up
AT2G46830	CCA1	Protein CCA1 [Source:UniProtKB/Swiss-Prot;Acc:P92973]	Up
AT1G29600		Zinc finger C-x8-C-x5-C-x3-H type family protein [Source:TAIR;Acc:AT1G29600]	Up
AT3G61390	PUB36	U-box domain-containing protein 36 [Source:UniProtKB/Swiss-Prot;Acc:Q8GZ84]	Up
AT1G61750	CRRSP1	Cysteine-rich repeat secretory protein 1 [Source:UniProtKB/Swiss-Prot;Acc:Q9SYB1]	Up
AT5G20710	BGAL7	Beta-galactosidase 7 [Source:UniProtKB/Swiss-Prot;Acc:Q9SCV5]	Up
AT3G47220	PLC9	Phosphoinositide phospholipase C 9 [Source:UniProtKB/Swiss-Prot;Acc:Q6NMA7]	Up
AT5G24410	PGL4	Probable 6-phosphogluconolactonase 4 [Source:UniProtKB/Swiss-Prot;Acc:Q9FIN1]	Up
AT5G59270		Concanavalin A-like lectin protein kinase family protein [Source:TAIR;Acc:AT5G59270]	Up
AT1G63550	CRRSP9	Cysteine-rich repeat secretory protein 9 [Source:UniProtKB/Swiss-Prot;Acc:Q5Q0E2]	Up
AT1G09090	RBOHB	Respiratory burst oxidase homolog protein B [Source:UniProtKB/Swiss-Prot;Acc:Q9SBI0]	Up
AT4G23980	ARF9	Auxin response factor 9 [Source:UniProtKB/Swiss-Prot;Acc:Q9XED8]	Up
AT1G10340		Ankyrin repeat family protein [Source:UniProtKB/TrEMBL;Acc:Q9SY76]	Up
AT2G20100		basic helix-loop-helix (bHLH) DNA-binding superfamily protein [Source:TAIR;Acc:AT2G20100]	Up
AT4G08250	SCL26	Scarecrow-like protein 26 [Source:UniProtKB/Swiss-Prot;Acc:Q9SUF5]	Up
AT2G19410		U-box domain-containing protein kinase family protein [Source:TAIR;Acc:AT2G19410]	Up
AT2G25150	SCT	Spermidine coumaroyl-CoA acyltransferase [Source:UniProtKB/Swiss-Prot;Acc:Q8GYW8]	Up
AT1G24320	GCS2	Alpha-glucosidase 2 [Source:UniProtKB/Swiss-Prot;Acc:Q84M89]	Up
AT1G07460		Concanavalin A-like lectin family protein [Source:UniProtKB/TrEMBL;Acc:Q9LNW6]	Up
AT5G44582		unknown protein; FUNCTIONS IN: molecular_function unknown; INVOLVED IN: biological_process unknown; LOCATED IN: endomembrane system; BEST Arabidopsis thaliana protein match is: unknown protein (TAIR:AT5G44580.1); Ha. [Source:TAIR;Acc:AT5G44582]	Up
AT3G51570		Disease resistance protein (TIR-NBS-LRR class) family [Source:UniProtKB/TrEMBL;Acc:Q9SCZ2]	Up
AT2G41240	BHLH100	BHLH100 [Source:UniProtKB/TrEMBL;Acc:A0A384LFW4]	Up
AT4G09130	ATL37	Putative RING-H2 finger protein ATL37 [Source:UniProtKB/Swiss-Prot;Acc:Q9M0R4]	Up
AT4G24150	GRF8	Growth-regulating factor 8 [Source:UniProtKB/Swiss-Prot;Acc:Q9SU44]	Up
AT1G04610	YUC3	Probable indole-3-pyruvate monooxygenase YUCCA3 [Source:UniProtKB/Swiss-Prot;Acc:O23024]	Up
AT3G52970	CYP76G1	Cytochrome P450, family 76, subfamily G, polypeptide 1 [Source:UniProtKB/TrEMBL;Acc:F4J865]	Up
AT3G50140		Transmembrane protein, putative (DUF247) [Source:UniProtKB/TrEMBL;Acc:F4IZB4]	Up
AT2G40750	WRKY54	Probable WRKY transcription factor 54 [Source:UniProtKB/Swiss-Prot;Acc:Q93WU8]	Up
AT3G32047		Cytochrome P450 superfamily protein [Source:UniProtKB/TrEMBL;Acc:F4JA71]	Up
AT5G46370	TPK2	KCO2 [Source:UniProtKB/TrEMBL;Acc:A0A178UQZ6]	Up
AT3G53040		Late embryogenesis abundant protein At3g53040 [Source:UniProtKB/Swiss-Prot;Acc:Q9LF88]	Up
AT2G27402		At2g27402 [Source:UniProtKB/TrEMBL;Acc:Q8GX30]	Up
AT4G09750		NAD(P)-binding Rossmann-fold superfamily protein [Source:UniProtKB/TrEMBL;Acc:Q9SZ91]	Down
AT5G53970		Probable aminotransferase TAT2 [Source:UniProtKB/Swiss-Prot;Acc:Q9FN30]	Down
AT3G16140	PSAH1	Photosystem I reaction center subunit VI-1, chloroplastic [Source:UniProtKB/Swiss-Prot;Acc:Q9SUI7]	Down
AT2G21960		Expressed protein [Source:UniProtKB/TrEMBL;Acc:Q9SJ03]	Down
AT3G47070		Thylakoid soluble phosphoprotein [Source:UniProtKB/TrEMBL;Acc:Q9SD66]	Down
AT2G26500		At2g26500/T9J22.17 [Source:UniProtKB/TrEMBL;Acc:O48717]	Down
AT2G38465		Expressed protein [Source:UniProtKB/TrEMBL;Acc:Q8S8P4]	Down
AT1G62750	CPEFG	Elongation factor G, chloroplastic [Source:UniProtKB/Swiss-Prot;Acc:Q9SI75]	Down
AT1G71500		Rieske (2Fe-2S) domain-containing protein [Source:UniProtKB/TrEMBL;Acc:Q9C9I7]	Down
AT2G20260	PSAE2	Photosystem I reaction center subunit IV B, chloroplastic [Source:UniProtKB/Swiss-Prot;Acc:Q9S714]	Down
AT5G43630	TZP	Zinc knuckle (CCHC-type) family protein [Source:UniProtKB/TrEMBL;Acc:Q9FIX7]	Down
AT2G46420		At2g46420/F11C10.11 [Source:UniProtKB/TrEMBL;Acc:Q9SKD8]	Down
AT4G05180	PSBQ2	Oxygen-evolving enhancer protein 3-2, chloroplastic [Source:UniProtKB/Swiss-Prot;Acc:Q41932]	Down
AT1G58848	RF9	Probable disease resistance protein RDL6 [Source:UniProtKB/Swiss-Prot;Acc:P0DI18]	Down
AT5G15970	KIN2	KIN2 [Source:UniProtKB/TrEMBL;Acc:A0A384KRF8]	Down
AT1G23740	AOR	NADPH-dependent alkenal/one oxidoreductase, chloroplastic [Source:UniProtKB/Swiss-Prot;Acc:Q9ZUC1]	Down
AT1G52870		At1g52870/F14G24_14 [Source:UniProtKB/TrEMBL;Acc:Q9C933]	Down
AT3G04420	anac048	AT3g04420/T27C4_6 [Source:UniProtKB/TrEMBL;Acc:Q8W4R4]	Down
AT1G25440	COL16	Zinc finger protein CONSTANS-LIKE 16 [Source:UniProtKB/Swiss-Prot;Acc:Q8RWD0]	Down
AT3G55120	CHI1	Chalcone--flavonone isomerase 1 [Source:UniProtKB/Swiss-Prot;Acc:P41088]	Down
AT5G11260	HY5	Basic-leucine zipper (bZIP) transcription factor family protein [Source:TAIR;Acc:AT5G11260]	Down
AT4G09650	ATPD	PDE332 [Source:UniProtKB/TrEMBL;Acc:A0A178V1L3]	Down
AT4G34190	2019-09-01	Stress enhanced protein 1, chloroplastic [Source:UniProtKB/Swiss-Prot;Acc:Q9M7I9]	Down
AT5G41590		Protein LURP-one-related 17 [Source:UniProtKB/Swiss-Prot;Acc:A0MFL4]	Down
AT4G12500		pEARLI1-like lipid transfer protein 3 [Source:UniProtKB/Swiss-Prot;Acc:Q9SU33]	Down
AT1G50450		At1g50450/F11F12_20 [Source:UniProtKB/TrEMBL;Acc:Q94BZ0]	Down
AT1G32470	GDH3	Glycine cleavage system H protein 3, mitochondrial [Source:UniProtKB/Swiss-Prot;Acc:Q9LQL0]	Down
AT5G07190	ATS3	Embryo-specific protein ATS3 [Source:UniProtKB/Swiss-Prot;Acc:Q9LYP6]	Down
AT2G33250		At2g33250/F25I18.1 [Source:UniProtKB/TrEMBL;Acc:O22777]	Down
AT2G05310		Expressed protein [Source:UniProtKB/TrEMBL;Acc:Q9SJ31]	Down
AT5G16010		3-oxo-5-alpha-steroid 4-dehydrogenase family protein [Source:UniProtKB/TrEMBL;Acc:Q9LFS3]	Down
AT4G26150	GATA22	Putative GATA transcription factor 22 [Source:UniProtKB/Swiss-Prot;Acc:Q9SZI6]	Down
AT3G57190	PRFB3	PrfB3 [Source:UniProtKB/TrEMBL;Acc:A0A178VAE2]	Down
AT4G23260	CRK18	Cysteine-rich receptor-like protein kinase 18 [Source:UniProtKB/Swiss-Prot;Acc:Q8RX80]	Down
AT4G04330	RBCX1	Chaperonin-like RBCX protein 1, chloroplastic [Source:UniProtKB/Swiss-Prot;Acc:Q94AU9]	Down
AT1G12250	TL20.3	Thylakoid lumenal protein TL20.3, chloroplastic [Source:UniProtKB/Swiss-Prot;Acc:Q8H1Q1]	Down
AT3G52740	BIC1	Protein BIC1 [Source:UniProtKB/Swiss-Prot;Acc:Q9LXJ1]	Down
AT4G37800	XTH7	Probable xyloglucan endotransglucosylase/hydrolase protein 7 [Source:UniProtKB/Swiss-Prot;Acc:Q8LER3]	Down
AT5G19850		Alpha/beta-Hydrolases superfamily protein [Source:UniProtKB/TrEMBL;Acc:F4K2M9]	Down
AT4G14690	ELIP2	Early light-induced protein 2, chloroplastic [Source:UniProtKB/Swiss-Prot;Acc:Q94K66]	Down
AT5G52250	RUP1	WD repeat-containing protein RUP1 [Source:UniProtKB/Swiss-Prot;Acc:Q9LTJ6]	Down
AT4G28750	PSAE1	Photosystem I reaction center subunit IV A, chloroplastic [Source:UniProtKB/Swiss-Prot;Acc:Q9S831]	Down
AT2G43530	ATTI3	Defensin-like protein 194 [Source:UniProtKB/Swiss-Prot;Acc:O22867]	Down
AT1G53090	SPA4	SPA4 [Source:UniProtKB/TrEMBL;Acc:A0A178WBA0]	Down
AT5G13930	CHS	Chalcone synthase family protein [Source:UniProtKB/TrEMBL;Acc:Q460R0]	Down
AT1G34000	OHP2	OHP2 [Source:UniProtKB/TrEMBL;Acc:A0A178WAB5]	Down
AT4G15530	PPDK	Pyruvate, phosphate dikinase 1, chloroplastic [Source:UniProtKB/Swiss-Prot;Acc:O23404]	Down
AT1G25275		AT1G25275 protein [Source:UniProtKB/TrEMBL;Acc:B9DG55]	Down
AT1G79040	PSBR	Photosystem II 10 kDa polypeptide, chloroplastic [Source:UniProtKB/Swiss-Prot;Acc:P27202]	Down
AT5G51010		Rubredoxin-like superfamily protein [Source:UniProtKB/TrEMBL;Acc:Q9FI47]	Down
AT4G12800	PSAL	photosystem I subunit l [Source:TAIR;Acc:AT4G12800]	Down
AT2G34080		Cysteine proteinases superfamily protein [Source:UniProtKB/TrEMBL;Acc:O22961]	Down
AT3G52340	SPP2	Sucrose-6F-phosphate phosphohydrolase 2 [Source:UniProtKB/TrEMBL;Acc:A0A1I9LQG1]	Down
AT5G51110	ATP1	Probable pterin-4-alpha-carbinolamine dehydratase, chloroplastic [Source:UniProtKB/Swiss-Prot;Acc:Q9LU63]	Down
AT2G47460	MYB12	Transcription factor MYB12 [Source:UniProtKB/Swiss-Prot;Acc:O22264]	Down
AT5G22020		At5g22020 [Source:UniProtKB/TrEMBL;Acc:Q9C586]	Down
AT5G16530	PIN5	Auxin efflux carrier component [Source:UniProtKB/TrEMBL;Acc:A0A178UIR3]	Down
AT3G17609	HYH	HYH [Source:UniProtKB/TrEMBL;Acc:A0A178VIU6]	Down
AT2G23000	SCPL10	Scpl10 [Source:UniProtKB/TrEMBL;Acc:A0A178VYK6]	Down
AT1G52220	CURT1C	CURT1C [Source:UniProtKB/TrEMBL;Acc:A0A178WBD4]	Down
AT2G33180		Uncharacterized protein At2g33180 [Source:UniProtKB/TrEMBL;Acc:O49317]	Down
AT2G37660		Uncharacterized protein At2g37660, chloroplastic [Source:UniProtKB/Swiss-Prot;Acc:O80934]	Down
AT5G19500		At5g19500 [Source:UniProtKB/TrEMBL;Acc:Q5PP33]	Down
AT3G26060	ATPRX Q	Thioredoxin superfamily protein [Source:UniProtKB/TrEMBL;Acc:F4JBC9]	Down
AT5G57030	LUT2	Lycopene epsilon cyclase, chloroplastic [Source:UniProtKB/Swiss-Prot;Acc:Q38932]	Down
AT5G57780		At5g57780 [Source:UniProtKB/TrEMBL;Acc:Q9FJN6]	Down
AT3G63540		Mog1/PsbP/DUF1795-like photosystem II reaction center PsbP family protein [Source:TAIR;Acc:AT3G63540]	Down
AT5G48880	KAT5	PKT2 [Source:UniProtKB/TrEMBL;Acc:A0A178UEC0]	Down
AT1G74470	CHLP	Geranylgeranyl diphosphate reductase, chloroplastic [Source:UniProtKB/Swiss-Prot;Acc:Q9CA67]	Down
AT1G65060	4CL3	4-coumarate--CoA ligase 3 [Source:UniProtKB/Swiss-Prot;Acc:Q9S777]	Down
AT1G61520	LHCA3	Chlorophyll a-b binding protein, chloroplastic [Source:UniProtKB/TrEMBL;Acc:A0A178W5Y6]	Down
AT4G27030	FAD4	FADA [Source:UniProtKB/TrEMBL;Acc:A0A178UUY9]	Down
AT3G02730	TRXF1	TRXF1 [Source:UniProtKB/TrEMBL;Acc:A0A178VBJ7]	Down
AT1G76730	COG0212	COG0212 [Source:UniProtKB/TrEMBL;Acc:A0A178WEK7]	Down
AT5G23120	HCF136	photosystem II stability/assembly factor, chloroplast (HCF136) [Source:TAIR;Acc:AT5G23120]	Down
AT1G01170		At1g01170 [Source:UniProtKB/TrEMBL;Acc:Q2HIQ2]	Down
AT1G13670		At1g13670 [Source:UniProtKB/TrEMBL;Acc:Q9LMY0]	Down
AT1G75690	LQY1	LQY1 [Source:UniProtKB/TrEMBL;Acc:A0A178W9N8]	Down
AT2G29630	THIC	Phosphomethylpyrimidine synthase, chloroplastic [Source:UniProtKB/Swiss-Prot;Acc:O82392]	Down
AT4G15480	UGT84A1	UDP-glycosyltransferase 84A1 [Source:UniProtKB/Swiss-Prot;Acc:Q5XF20]	Down
AT3G48690	CXE12	Probable carboxylesterase 12 [Source:UniProtKB/Swiss-Prot;Acc:Q9SMN0]	Down
AT2G24820	TIC55	Protein TIC 55, chloroplastic [Source:UniProtKB/Swiss-Prot;Acc:Q9SK50]	Down
AT2G36870	XTH32	Probable xyloglucan endotransglucosylase/hydrolase protein 32 [Source:UniProtKB/Swiss-Prot;Acc:Q9SJL9]	Down
AT1G06680	PSBP1	Oxygen-evolving enhancer protein 2-1, chloroplastic [Source:UniProtKB/Swiss-Prot;Acc:Q42029]	Down
AT2G02950	PKS1	Protein PHYTOCHROME KINASE SUBSTRATE 1 [Source:UniProtKB/Swiss-Prot;Acc:Q9SWI1]	Down
AT5G04000		unknown protein; Ha. [Source:TAIR;Acc:AT5G04000]	Down
AT1G53670	MSRB1	Peptide methionine sulfoxide reductase B1, chloroplastic [Source:UniProtKB/Swiss-Prot;Acc:Q9C8M2]	Down
AT1G52100		Mannose-binding lectin superfamily protein [Source:TAIR;Acc:AT1G52100]	Down
AT2G37970	SOUL-1	SOUL heme-binding family protein [Source:TAIR;Acc:AT2G37970]	Down
AT2G22590	UGT91A1	UDP-glycosyltransferase 91A1 [Source:UniProtKB/Swiss-Prot;Acc:Q940V3]	Down
AT2G39730	RCA	Ribulose bisphosphate carboxylase/oxygenase activase, chloroplastic [Source:UniProtKB/Swiss-Prot;Acc:P10896]	Down
AT5G44574		unknown protein; FUNCTIONS IN: molecular_function unknown; INVOLVED IN: biological_process unknown; LOCATED IN: endomembrane system; Ha. [Source:TAIR;Acc:AT5G44574]	Down
AT3G61870		AT3g61870/F21F14_40 [Source:UniProtKB/TrEMBL;Acc:Q9M277]	Down
AT4G12480	EARLI1	PEARLI 1 [Source:UniProtKB/TrEMBL;Acc:A0A178V1J0]	Down
AT4G37760	SQE3	Squalene epoxidase 3 [Source:UniProtKB/Swiss-Prot;Acc:Q8VYH2]	Down
AT5G54770	THI1	Thiamine thiazole synthase, chloroplastic [Source:UniProtKB/TrEMBL;Acc:A0A178UNL2]	Down
AT1G18060		AT1g18060/T10F20.23 [Source:UniProtKB/TrEMBL;Acc:Q9LM40]	Down
AT1G32060	PRK	Phosphoribulokinase [Source:UniProtKB/TrEMBL;Acc:A0A178WLP9]	Down
AT5G24160	SQE6	Squalene epoxidase 6 [Source:UniProtKB/Swiss-Prot;Acc:O65402]	Down
AT2G16740	UBC29	UBC29 [Source:UniProtKB/TrEMBL;Acc:A0A178VQZ9]	Down
AT1G72645		At1g72645 [Source:UniProtKB/TrEMBL;Acc:Q8RXY2]	Down
AT1G60600	ABC4	2-carboxy-1,4-naphthoquinone phytyltransferase, chloroplastic [Source:UniProtKB/Swiss-Prot;Acc:Q0WUA3]	Down
AT5G65870	PSK5	Phytosulfokines 5 [Source:UniProtKB/Swiss-Prot;Acc:Q9FEB4]	Down
AT5G63580	FLS2	Putative inactive flavonol synthase 2 [Source:UniProtKB/Swiss-Prot;Acc:B2GVM7]	Down
AT4G36530		Alpha/beta-Hydrolases superfamily protein [Source:UniProtKB/TrEMBL;Acc:O23227]	Down
AT1G68010	HPR	hydroxypyruvate reductase [Source:TAIR;Acc:AT1G68010]	Down
AT5G17700	DTX25	Protein DETOXIFICATION [Source:UniProtKB/TrEMBL;Acc:A0A178UJQ3]	Down
AT1G50250	FTSH1	ATP-dependent zinc metalloprotease FTSH 1, chloroplastic [Source:UniProtKB/Swiss-Prot;Acc:Q39102]	Down
AT1G06540		F12K11.13 [Source:UniProtKB/TrEMBL;Acc:Q9SHJ7]	Down
AT1G13610		Alpha/beta-Hydrolases superfamily protein [Source:UniProtKB/TrEMBL;Acc:Q9FZ68]	Down
AT1G73650		Protein of unknown function (DUF1295) [Source:TAIR;Acc:AT1G73650]	Down
AT3G23530		AT3g23510/MEE5_5 [Source:UniProtKB/TrEMBL;Acc:Q8VZH1]	Down
AT2G16890	UGT90A1	UDP-glycosyltransferase 90A1 [Source:UniProtKB/Swiss-Prot;Acc:Q9ZVX4]	Down
AT2G32640		Lycopene beta/epsilon cyclase protein [Source:UniProtKB/TrEMBL;Acc:Q0WVA1]	Down
AT5G17780		alpha/beta-Hydrolases superfamily protein [Source:TAIR;Acc:AT5G17780]	Down
AT2G38870		Putative protease inhibitor [Source:UniProtKB/TrEMBL;Acc:Q9ZV18]	Down
AT3G17040	HCF107	Protein high chlorophyll fluorescent 107 [Source:UniProtKB/Swiss-Prot;Acc:Q8RWG2]	Down
AT3G61220		NAD(P)-binding Rossmann-fold superfamily protein [Source:UniProtKB/TrEMBL;Acc:A0A1I9LNT2]	Down
AT1G35420		Alpha/beta-Hydrolases superfamily protein [Source:UniProtKB/TrEMBL;Acc:F4HYC8]	Down
AT4G04750		Major facilitator superfamily protein [Source:TAIR;Acc:AT4G04750]	Down
AT3G26080		Plastid-lipid associated protein PAP / fibrillin family protein [Source:UniProtKB/TrEMBL;Acc:A0A1I9LP70]	Down
AT3G57640		At3g57640 [Source:UniProtKB/TrEMBL;Acc:Q9SVX8]	Down
AT1G45474	LHCA5	Photosystem I chlorophyll a/b-binding protein 5, chloroplastic [Source:UniProtKB/Swiss-Prot;Acc:Q9C639]	Down
AT5G50100		Uncharacterized protein At5g50100, chloroplastic [Source:UniProtKB/Swiss-Prot;Acc:Q8W485]	Down
AT2G34810		Berberine bridge enzyme-like 16 [Source:UniProtKB/Swiss-Prot;Acc:O64745]	Down
AT4G32770	VTE1	Tocopherol cyclase, chloroplastic [Source:UniProtKB/Swiss-Prot;Acc:Q94FY7]	Down
AT1G06430	FTSH8	ATP-dependent zinc metalloprotease FTSH 8, chloroplastic [Source:UniProtKB/Swiss-Prot;Acc:Q8W585]	Down
AT4G04840	MSRB6	MSRB6 [Source:UniProtKB/TrEMBL;Acc:A0A178V4R5]	Down
AT4G10340	LHCB5	Chlorophyll a-b binding protein, chloroplastic [Source:UniProtKB/TrEMBL;Acc:A0A178UW55]	Down
AT1G20020	LFNR2	Ferredoxin--NADP reductase, leaf isozyme 2, chloroplastic [Source:UniProtKB/Swiss-Prot;Acc:Q8W493]	Down
AT4G27560	UGT79B2	UDP-glycosyltransferase 79B2 [Source:UniProtKB/Swiss-Prot;Acc:Q9T080]	Down
AT3G54890	LHCA1	Chlorophyll a-b binding protein, chloroplastic [Source:UniProtKB/TrEMBL;Acc:A0A178VBT7]	Down
AT4G25050	ACP4	Acyl carrier protein 4 [Source:UniProtKB/TrEMBL;Acc:F4JRT7]	Down
AT4G12470	AZI1	pEARLI1-like lipid transfer protein 1 [Source:UniProtKB/Swiss-Prot;Acc:Q9SU35]	Down
AT4G00370	PHT4;4	Ascorbate transporter, chloroplastic [Source:UniProtKB/Swiss-Prot;Acc:Q8GX78]	Down
AT5G66570	PSBO1	Oxygen-evolving enhancer protein 1-1, chloroplastic [Source:UniProtKB/Swiss-Prot;Acc:P23321]	Down
AT4G08150	KNAT1	Homeobox protein knotted-1-like 1 [Source:UniProtKB/Swiss-Prot;Acc:P46639]	Down
AT1G49975		At1g49975 [Source:UniProtKB/TrEMBL;Acc:Q8LFL5]	Down
AT4G17600	LIL3.1	Light-harvesting complex-like protein 3 isotype 1, chloroplastic [Source:UniProtKB/Swiss-Prot;Acc:Q9SYX1]	Down
AT1G31330	PSAF	Photosystem I reaction center subunit III, chloroplastic [Source:UniProtKB/Swiss-Prot;Acc:Q9SHE8]	Down
AT5G17040	UGT78D4	UDP-glycosyltransferase 78D4 [Source:UniProtKB/Swiss-Prot;Acc:Q9LFJ9]	Down
AT3G54990	SMZ	AP2-like ethylene-responsive transcription factor SMZ [Source:UniProtKB/Swiss-Prot;Acc:Q6PV68]	Down
AT3G08700	UBC12	Probable ubiquitin-conjugating enzyme E2 12 [Source:UniProtKB/Swiss-Prot;Acc:Q9C9Y7]	Down
AT3G11210	CPRD49	GDSL esterase/lipase CPRD49 [Source:UniProtKB/Swiss-Prot;Acc:Q9SRM5]	Down
AT2G48090		unknown protein; FUNCTIONS IN: molecular_function unknown; INVOLVED IN: biological_process unknown; LOCATED IN: chloroplast; EXPRESSED IN: male gametophyte, root, flower, carpel; EXPRESSED DURING: 4 anthesis, petal differentiation and expansion stage. [Source:TAIR;Acc:AT2G48090]	Down
AT2G36990	SIGF	RNA polymerase sigma factor sigF, chloroplastic [Source:UniProtKB/Swiss-Prot;Acc:Q9LD95]	Down
AT1G69310	WRKY57	At1g69310 [Source:UniProtKB/TrEMBL;Acc:Q147N6]	Down
AT4G33660		Adhesive/proline-rich-like protein [Source:UniProtKB/TrEMBL;Acc:Q8LG30]	Down
AT1G19140		FUNCTIONS IN: molecular_function unknown; INVOLVED IN: ubiquinone biosynthetic process; LOCATED IN: mitochondrion; EXPRESSED IN: 24 plant structures; EXPRESSED DURING: 15 growth stages; CONTAINS InterPro DOMAIN/s: COQ9 (InterPro:IPR013718), Ubiquino /.../synthesis protein COQ9 (InterPro:IPR012762); Ha. [Source:TAIR;Acc:AT1G19140]	Down
AT5G04140	GLU1	glutamate synthase 1 [Source:TAIR;Acc:AT5G04140]	Down
AT5G19940	PAP8	Probable plastid-lipid-associated protein 8, chloroplastic [Source:UniProtKB/Swiss-Prot;Acc:Q941D3]	Down
AT5G47110	LIL3.2	Light-harvesting complex-like protein 3 isotype 2, chloroplastic [Source:UniProtKB/Swiss-Prot;Acc:Q6NKS4]	Down
AT5G38520		Alpha/beta-Hydrolases superfamily protein [Source:UniProtKB/TrEMBL;Acc:F4KBJ3]	Down
AT1G03630	PORC	Protochlorophyllide reductase C, chloroplastic [Source:UniProtKB/Swiss-Prot;Acc:O48741]	Down
AT2G18480	PLT3	Probable polyol transporter 3 [Source:UniProtKB/Swiss-Prot;Acc:Q9ZNS0]	Down
AT3G61470	LHCA2	Photosystem I chlorophyll a/b-binding protein 2, chloroplastic [Source:UniProtKB/Swiss-Prot;Acc:Q9SYW8]	Down
AT3G12955		At3g12955 [Source:UniProtKB/TrEMBL;Acc:Q9LSI2]	Down
AT2G29450	GSTU5	GSTU5 [Source:UniProtKB/TrEMBL;Acc:A0A178VPP0]	Down
AT4G34830	MRL1	Pentatricopeptide repeat-containing protein MRL1, chloroplastic [Source:UniProtKB/Swiss-Prot;Acc:Q0WLC6]	Down
AT1G67090	RBCS-1A	Ribulose bisphosphate carboxylase small chain [Source:UniProtKB/TrEMBL;Acc:A0A178WD57]	Down
AT4G37310	CYP81H1	Cytochrome P450, family 81, subfamily H, polypeptide 1 [Source:UniProtKB/TrEMBL;Acc:Q9SW67]	Down
AT3G51820	CHLG	Chlorophyll synthase, chloroplastic [Source:UniProtKB/Swiss-Prot;Acc:Q38833]	Down
AT1G30380	PSAK	Photosystem I reaction center subunit psaK, chloroplastic [Source:UniProtKB/Swiss-Prot;Acc:Q9SUI5]	Down
AT3G21520	DMP1	Protein DMP1 [Source:UniProtKB/Swiss-Prot;Acc:Q9LVF4]	Down
AT2G30570	PSBW	PSBW [Source:UniProtKB/TrEMBL;Acc:A0A178VQ32]	Down
AT5G64940	ATATH13	Protein ACTIVITY OF BC1 COMPLEX KINASE 8, chloroplastic [Source:UniProtKB/Swiss-Prot;Acc:Q93Y08]	Down
AT2G16385	CIF1	Protein CASPARIAN STRIP INTEGRITY FACTOR 1 [Source:UniProtKB/Swiss-Prot;Acc:Q84MD2]	Down
AT3G48700	CXE13	Probable carboxylesterase 13 [Source:UniProtKB/Swiss-Prot;Acc:Q9SMM9]	Down
AT3G57020	SSL9	Protein STRICTOSIDINE SYNTHASE-LIKE 9 [Source:UniProtKB/Swiss-Prot;Acc:Q9M1J6]	Down
AT1G67740	PSBY	Putative uncharacterized protein [Source:UniProtKB/TrEMBL;Acc:Q549N8]	Down
AT1G75460		ATP-dependent protease La (LON) domain protein [Source:UniProtKB/TrEMBL;Acc:Q9FWT4]	Down
AT3G26070	PAP4	Probable plastid-lipid-associated protein 4, chloroplastic [Source:UniProtKB/Swiss-Prot;Acc:Q9LU85]	Down
AT1G22750		AT1G22750 protein [Source:UniProtKB/TrEMBL;Acc:O64379]	Down
AT3G47030		F-box protein At3g47030 [Source:UniProtKB/Swiss-Prot;Acc:Q9SD70]	Down
AT5G28500	RAF1.1	Rubisco accumulation factor 1.1, chloroplastic [Source:UniProtKB/Swiss-Prot;Acc:Q9LKR8]	Down
AT5G05270	CHI3	Probable chalcone--flavonone isomerase 3 [Source:UniProtKB/Swiss-Prot;Acc:Q8VZW3]	Down
AT1G42970	GAPB	Glyceraldehyde-3-phosphate dehydrogenase GAPB, chloroplastic [Source:UniProtKB/Swiss-Prot;Acc:P25857]	Down
AT4G02770	PSAD1	Photosystem I reaction center subunit II-1, chloroplastic [Source:UniProtKB/Swiss-Prot;Acc:Q9S7H1]	Down
AT5G24850	CRYD	Cryptochrome DASH, chloroplastic/mitochondrial [Source:UniProtKB/Swiss-Prot;Acc:Q84KJ5]	Down
AT1G14345		NAD(P)-linked oxidoreductase superfamily protein [Source:UniProtKB/TrEMBL;Acc:Q949S6]	Down
AT5G16970	AER	NADPH-dependent oxidoreductase 2-alkenal reductase [Source:UniProtKB/Swiss-Prot;Acc:Q39172]	Down
AT1G23010	LPR1	Multicopper oxidase LPR1 [Source:UniProtKB/Swiss-Prot;Acc:F4I4K5]	Down
AT5G62210		Embryo-specific protein 3, (ATS3) [Source:UniProtKB/TrEMBL;Acc:Q9LVB5]	Down
AT5G37550		At5g37550 [Source:UniProtKB/TrEMBL;Acc:Q9FGI2]	Down
AT2G34460		Uncharacterized protein At2g34460, chloroplastic [Source:UniProtKB/Swiss-Prot;Acc:Q8H124]	Down
AT2G28605	PPD2	PsbP domain-containing protein 2, chloroplastic [Source:UniProtKB/Swiss-Prot;Acc:Q8VY52]	Down
AT1G78450		F3F9.4 [Source:UniProtKB/TrEMBL;Acc:Q9SYN6]	Down
AT3G56940	CRD1	Magnesium-protoporphyrin IX monomethyl ester [oxidative] cyclase, chloroplastic [Source:UniProtKB/Swiss-Prot;Acc:Q9M591]	Down
AT5G07990	CYP75B1	TT7 [Source:UniProtKB/TrEMBL;Acc:A0A178UNZ9]	Down
AT4G37150	MES9	MES9 [Source:UniProtKB/TrEMBL;Acc:A0A178V387]	Down
AT1G15820	LHCB6	Chlorophyll a-b binding protein, chloroplastic [Source:UniProtKB/TrEMBL;Acc:Q9LMQ2]	Down
AT1G06690		Uncharacterized oxidoreductase At1g06690, chloroplastic [Source:UniProtKB/Swiss-Prot;Acc:Q94A68]	Down
AT2G36145		Expressed protein [Source:UniProtKB/TrEMBL;Acc:Q8VXY0]	Down
AT1G17100		HBP1 [Source:UniProtKB/TrEMBL;Acc:A0A178W6J0]	Down
AT5G08050		Wiskott-aldrich syndrome family protein, putative (DUF1118) [Source:UniProtKB/TrEMBL;Acc:Q9SD79]	Down
AT5G02160		AT5g02160 [Source:UniProtKB/TrEMBL;Acc:Q9FPH2]	Down
AT1G60260	BGLU5	beta glucosidase 5 [Source:TAIR;Acc:AT1G60260]	Down
AT5G08710		RUG1 [Source:UniProtKB/TrEMBL;Acc:A0A178UAH3]	Down
AT4G26850	VTC2	GDP-L-galactose phosphorylase 1 [Source:UniProtKB/Swiss-Prot;Acc:Q8RWE8]	Down
AT1G57770		FAD/NAD(P)-binding oxidoreductase family protein [Source:UniProtKB/TrEMBL;Acc:Q9FVR9]	Down
AT4G24930		Thylakoid lumenal 17.9 kDa protein, chloroplastic [Source:UniProtKB/Swiss-Prot;Acc:Q9SW33]	Down
AT3G09520	ATEXO70H4	Exocyst subunit Exo70 family protein [Source:UniProtKB/TrEMBL;Acc:Q9SF51]	Down
AT1G10370	GSTU17	Glutathione S-transferase U17 [Source:UniProtKB/Swiss-Prot;Acc:Q9FUS8]	Down
AT5G23000	RAX1	Transcription factor RAX1 [Source:UniProtKB/Swiss-Prot;Acc:Q9FG68]	Down
AT1G78970	LUP1	Lupeol synthase 1 [Source:UniProtKB/Swiss-Prot;Acc:Q9C5M3]	Down
AT5G08640	FLS1	Flavonol synthase/flavanone 3-hydroxylase [Source:UniProtKB/Swiss-Prot;Acc:Q96330]	Down
AT2G21970	2019-09-02	SEP2 [Source:UniProtKB/TrEMBL;Acc:A0A178VQ84]	Down
AT1G08380	PSAO	PSAO [Source:UniProtKB/TrEMBL;Acc:A0A178W5Y5]	Down
AT5G04830		Nuclear transport factor 2 (NTF2) family protein [Source:UniProtKB/TrEMBL;Acc:Q9FMC7]	Down
AT2G45450	ZPR1	Protein LITTLE ZIPPER 1 [Source:UniProtKB/Swiss-Prot;Acc:F4IG60]	Down
AT1G78460		AT1G78460 protein [Source:UniProtKB/TrEMBL;Acc:Q9SYN5]	Down
AT1G55480	ZKT	Protein MET1, chloroplastic [Source:UniProtKB/Swiss-Prot;Acc:Q94BS2]	Down
AT4G28660	PSB28	Photosystem II reaction center Psb28 protein [Source:UniProtKB/TrEMBL;Acc:F4JM05]	Down
AT3G26570	PHT2;1	phosphate transporter 2;1 [Source:TAIR;Acc:AT3G26570]	Down
AT1G55670	PSAG	Photosystem I reaction center subunit V, chloroplastic [Source:UniProtKB/Swiss-Prot;Acc:Q9S7N7]	Down
AT5G17050	UGT78D2	Glycosyltransferase (Fragment) [Source:UniProtKB/TrEMBL;Acc:W8PUE7]	Down
AT5G57180	CIA2	CIA2 [Source:UniProtKB/TrEMBL;Acc:A0A178UDY1]	Down
AT5G44110	ABCI21	ABC transporter I family member 21 [Source:UniProtKB/Swiss-Prot;Acc:Q9XF19]	Down
AT1G31800	CYP97A3	Protein LUTEIN DEFICIENT 5, chloroplastic [Source:UniProtKB/Swiss-Prot;Acc:Q93VK5]	Down
AT1G68590		30S ribosomal protein 3-1, chloroplastic [Source:UniProtKB/Swiss-Prot;Acc:Q9SX22]	Down
AT2G42220	STR9	Rhodanese-like domain-containing protein 9, chloroplastic [Source:UniProtKB/Swiss-Prot;Acc:O48529]	Down
AT1G66725	MIR163	MIR163; miRNA [Source:TAIR;Acc:AT1G66725]	Down
AT3G15354	SPA3	Protein SPA1-RELATED 3 [Source:UniProtKB/Swiss-Prot;Acc:Q9LJR3]	Down
AT4G21280	PSBQ1	Oxygen-evolving enhancer protein 3-1, chloroplastic [Source:UniProtKB/Swiss-Prot;Acc:Q9XFT3]	Down
AT2G37240		Thioredoxin-like protein AAED1, chloroplastic [Source:UniProtKB/Swiss-Prot;Acc:Q9ZUU2]	Down
AT4G35250		HCF244 [Source:UniProtKB/TrEMBL;Acc:A0A178UXV2]	Down
AT2G35260		At2g35260/T4C15.7 [Source:UniProtKB/TrEMBL;Acc:O82167]	Down
AT2G28700	AGL46	AGAMOUS-like 46 [Source:UniProtKB/TrEMBL;Acc:F4IIT6]	Down
AT3G26650	GAPA1	Glyceraldehyde-3-phosphate dehydrogenase GAPA1, chloroplastic [Source:UniProtKB/Swiss-Prot;Acc:P25856]	Down
AT2G23910		At2g23910 [Source:UniProtKB/TrEMBL;Acc:O82219]	Down
AT5G13630	CHLH	Magnesium-chelatase subunit ChlH, chloroplastic [Source:UniProtKB/Swiss-Prot;Acc:Q9FNB0]	Down
AT5G46350	WRKY8	WRKY transcription factor 8 [Source:UniProtKB/Swiss-Prot;Acc:Q9FL26]	Down
AT4G28740		FUNCTIONS IN: molecular_function unknown; INVOLVED IN: biological_process unknown; LOCATED IN: chloroplast; EXPRESSED IN: 21 plant structures; EXPRESSED DURING: 13 growth stages; CONTAINS InterPro DOMAIN/s: Protein of unknown function DUF3493 (Inter /.../R021883); BEST Arabidopsis thaliana protein match is: tetratricopeptide repeat (TPR)-containing protein (TAIR:AT1G02910.1); Ha. [Source:TAIR;Acc…	Down
AT5G57345		At5g57345 [Source:UniProtKB/TrEMBL;Acc:Q8LAD4]	Down
AT2G33855		At2g33855 [Source:UniProtKB/TrEMBL;Acc:Q29Q74]	Down
AT1G02340	HFR1	Transcription factor HFR1 [Source:UniProtKB/Swiss-Prot;Acc:Q9FE22]	Down
AT3G44450	BIC2	Protein BIC2 [Source:UniProtKB/Swiss-Prot;Acc:Q9M280]	Down
AT4G04640	ATPC1	ATP synthase gamma chain 1, chloroplastic [Source:UniProtKB/Swiss-Prot;Acc:Q01908]	Down
AT1G74730		Transmembrane protein, putative (DUF1118) [Source:UniProtKB/TrEMBL;Acc:Q94F10]	Down
AT5G52970		Thylakoid lumenal 15.0 kDa protein 2, chloroplastic [Source:UniProtKB/Swiss-Prot;Acc:Q9LVV5]	Down
AT2G16365		F-box protein At2g16365 [Source:UniProtKB/Swiss-Prot;Acc:Q84V03]	Down
AT1G33560	ADR1	Disease resistance protein ADR1 [Source:UniProtKB/Swiss-Prot;Acc:Q9FW44]	Down
AT1G11330		G-type lectin S-receptor-like serine/threonine-protein kinase At1g11330 [Source:UniProtKB/Swiss-Prot;Acc:Q9SXB8]	Down
AT1G52230	PSAH2	Photosystem I reaction center subunit VI-2, chloroplastic [Source:UniProtKB/Swiss-Prot;Acc:Q9SUI6]	Down
AT2G25530		AFG1-like ATPase family protein [Source:UniProtKB/TrEMBL;Acc:Q9SKJ6]	Down
AT5G45870	PYL12	Abscisic acid receptor PYL12 [Source:UniProtKB/Swiss-Prot;Acc:Q9FJ49]	Down
AT5G13770		Pentatricopeptide repeat-containing protein At5g13770, chloroplastic [Source:UniProtKB/Swiss-Prot;Acc:Q66GP4]	Down
AT1G30530	UGT78D1	Glycosyltransferase (Fragment) [Source:UniProtKB/TrEMBL;Acc:W8PVA4]	Down
AT5G24120	SIGE	RNA polymerase sigma factor sigE, chloroplastic/mitochondrial [Source:UniProtKB/Swiss-Prot;Acc:Q9ZNX9]	Down
AT2G05620	PGR5	Protein PROTON GRADIENT REGULATION 5, chloroplastic [Source:UniProtKB/Swiss-Prot;Acc:Q9SL05]	Down
AT5G20220		zinc knuckle (CCHC-type) family protein [Source:TAIR;Acc:AT5G20220]	Down
AT3G44880	PAO	Pheophorbide a oxygenase, chloroplastic [Source:UniProtKB/Swiss-Prot;Acc:Q9FYC2]	Down
AT5G58770		Dehydrodolichyl diphosphate synthase 2 [Source:UniProtKB/Swiss-Prot;Acc:Q56Y11]	Down
AT5G15910		NAD(P)-binding Rossmann-fold superfamily protein [Source:UniProtKB/TrEMBL;Acc:Q949S7]	Down
AT4G18810		NAD(P)-binding Rossmann-fold superfamily protein [Source:UniProtKB/TrEMBL;Acc:F4JRN8]	Down
AT5G35790	G6PD1	Glucose-6-phosphate 1-dehydrogenase 1, chloroplastic [Source:UniProtKB/Swiss-Prot;Acc:Q43727]	Down
AT2G26740	ATSEH	At2g26740/F18A8.11 [Source:UniProtKB/TrEMBL;Acc:Q42566]	Down
AT5G56860	GATA21	GATA transcription factor 21 [Source:UniProtKB/Swiss-Prot;Acc:Q5HZ36]	Down
AT1G66540		At1g66540 [Source:UniProtKB/TrEMBL;Acc:A2RVN3]	Down
AT1G54780	TLP18.3	TLP18.3 [Source:UniProtKB/TrEMBL;Acc:A0A178WHT4]	Down
AT1G60950	FD2	Ferredoxin [Source:UniProtKB/TrEMBL;Acc:A0A178W2W5]	Down
AT4G34730		Probable ribosome-binding factor A, chloroplastic [Source:UniProtKB/Swiss-Prot;Acc:O65693]	Down
AT4G01050	TROL	thylakoid rhodanese-like [Source:TAIR;Acc:AT4G01050]	Down
AT4G29590		S-adenosyl-L-methionine-dependent methyltransferases superfamily protein [Source:UniProtKB/TrEMBL;Acc:Q9SU88]	Down
AT1G54570		Acyltransferase-like protein At1g54570, chloroplastic [Source:UniProtKB/Swiss-Prot;Acc:Q9ZVN2]	Down
AT2G44920		Thylakoid lumenal 15 kDa protein 1, chloroplastic [Source:UniProtKB/Swiss-Prot;Acc:O22160]	Down
AT3G24190		AT3g24190/MUJ8_17 [Source:UniProtKB/TrEMBL;Acc:Q9LRN0]	Down
AT4G15490	UGT84A3	UDP-glycosyltransferase 84A3 [Source:UniProtKB/Swiss-Prot;Acc:O23401]	Down
AT3G16350		At3g16350 [Source:UniProtKB/TrEMBL;Acc:Q84TG2]	Down
AT2G41000		Chaperone DnaJ-domain superfamily protein [Source:UniProtKB/TrEMBL;Acc:B3H694]	Down
AT2G36080	ARF31	B3 domain-containing protein At2g36080 [Source:UniProtKB/Swiss-Prot;Acc:Q8GYJ2]	Down
AT4G23496	SP1L5	Protein SPIRAL1-like 5 [Source:UniProtKB/Swiss-Prot;Acc:Q8LGD1]	Down
AT4G03280	PETC	Cytochrome b6-f complex iron-sulfur subunit, chloroplastic [Source:UniProtKB/Swiss-Prot;Acc:Q9ZR03]	Down
AT3G08860	PYD4	Alanine--glyoxylate aminotransferase 2 homolog 3, mitochondrial [Source:UniProtKB/Swiss-Prot;Acc:Q9SR86]	Down
AT1G12370	PHR1	Deoxyribodipyrimidine photo-lyase [Source:UniProtKB/Swiss-Prot;Acc:Q9SB00]	Down
AT1G26770	ATEXPA10	Expansin [Source:UniProtKB/TrEMBL;Acc:F4HPC1]	Down
AT1G20340	DRT112	Plastocyanin major isoform, chloroplastic [Source:UniProtKB/Swiss-Prot;Acc:P42699]	Down
AT2G35370	GDH1	Glycine cleavage system H protein [Source:UniProtKB/TrEMBL;Acc:A0A178VV72]	Down
AT3G47650		DnaJ/Hsp40 cysteine-rich domain superfamily protein [Source:UniProtKB/TrEMBL;Acc:Q9SN73]	Down
AT2G23840		At2g23840 [Source:UniProtKB/TrEMBL;Acc:Q6NMJ9]	Down
AT4G24350		Phosphorylase superfamily protein [Source:UniProtKB/TrEMBL;Acc:Q94K59]	Down
AT1G76080	CDSP32	CDSP32 [Source:UniProtKB/TrEMBL;Acc:A0A178WHK1]	Down
AT1G27020		Plant/protein [Source:UniProtKB/TrEMBL;Acc:O04551]	Down
AT1G10960	FD1	Ferredoxin-1, chloroplastic [Source:UniProtKB/Swiss-Prot;Acc:O04090]	Down
AT4G18020	APRR2	Two-component response regulator-like APRR2 [Source:UniProtKB/Swiss-Prot;Acc:Q6LA43]	Down
AT3G22840	ELIP1	ELIP1 [Source:UniProtKB/TrEMBL;Acc:A0A178VCA8]	Down
AT1G78440	GA2OX1	Gibberellin 2-beta-dioxygenase 1 [Source:UniProtKB/Swiss-Prot;Acc:Q8LEA2]	Down
AT2G24190		NAD(P)-binding Rossmann-fold superfamily protein [Source:TAIR;Acc:AT2G24190]	Down
AT3G20110	CYP705A20	CYP705A20 [Source:UniProtKB/TrEMBL;Acc:A0A178V8F4]	Down
AT5G54270	LHCB3	Chlorophyll a-b binding protein 3, chloroplastic [Source:UniProtKB/Swiss-Prot;Acc:Q9S7M0]	Down
AT2G06520	PSBX	PSBX [Source:UniProtKB/TrEMBL;Acc:A0A178W0Y5]	Down
AT5G56090	COX15	Cytochrome c oxidase assembly protein COX15 [Source:UniProtKB/Swiss-Prot;Acc:Q9FKT8]	Down
AT5G27810		At5g27810 [Source:UniProtKB/TrEMBL;Acc:Q3E8Z9]	Down
AT5G53880		Putative uncharacterized protein [Source:UniProtKB/TrEMBL;Acc:Q9FN38]	Down
AT4G39510	CYP96A12	CYP96A12 [Source:UniProtKB/TrEMBL;Acc:A0A178V036]	Down
AT3G21055	PSBTN	Photosystem II subunit T [Source:UniProtKB/TrEMBL;Acc:A0A1I9LS90]	Down
AT1G64500		F1N19.7 [Source:UniProtKB/TrEMBL;Acc:Q9SGW5]	Down
AT5G57785		At5g57785 [Source:UniProtKB/TrEMBL;Acc:Q8GY06]	Down
AT1G44575	PSBS	Photosystem II 22 kDa protein, chloroplastic [Source:UniProtKB/Swiss-Prot;Acc:Q9XF91]	Down
AT1G68500		Uncharacterized protein At1g68500 [Source:UniProtKB/TrEMBL;Acc:Q84K42]	Down
AT1G64290		F-box protein-like protein [Source:UniProtKB/TrEMBL;Acc:Q9C7V3]	Down
AT5G14370		CCT motif family protein [Source:UniProtKB/TrEMBL;Acc:Q949T9]	Down
AT3G56290		Potassium transporter [Source:UniProtKB/TrEMBL;Acc:Q9LYL4]	Down
AT1G60270	BGLU6	Putative beta-glucosidase 6 [Source:UniProtKB/Swiss-Prot;Acc:Q682B4]	Down
AT1G59700	GSTU16	Glutathione S-transferase U16 [Source:UniProtKB/Swiss-Prot;Acc:Q9XIF8]	Down
AT3G21560	UGT84A2	UGT84A2 [Source:UniProtKB/TrEMBL;Acc:A0A384L2P1]	Down
AT4G27440	PORB	Protochlorophyllide reductase B, chloroplastic [Source:UniProtKB/Swiss-Prot;Acc:P21218]	Down
AT3G21720	ICL	Isocitrate lyase [Source:UniProtKB/Swiss-Prot;Acc:P28297]	Down
AT5G10100	TPPI	Trehalose 6-phosphate phosphatase [Source:UniProtKB/TrEMBL;Acc:A0A178UDH6]	Down
AT5G23730	RUP2	WD repeat-containing protein RUP2 [Source:UniProtKB/Swiss-Prot;Acc:Q9FFA7]	Down
AT1G77090	PPD4	PsbP domain-containing protein 4, chloroplastic [Source:UniProtKB/Swiss-Prot;Acc:O49292]	Down
AT1G60000		AT1G60000 protein [Source:UniProtKB/TrEMBL;Acc:Q9ZUJ3]	Down
AT3G08660		Putative BTB/POZ domain-containing protein At3g08660 [Source:UniProtKB/Swiss-Prot;Acc:Q9C9Z0]	Down
AT5G17170	ENH1	Rubredoxin family protein [Source:UniProtKB/TrEMBL;Acc:Q9FFJ2]	Down
AT5G65840		Thioredoxin superfamily protein [Source:UniProtKB/TrEMBL;Acc:Q8L5Y8]	Down
AT4G04850	KEA3	K(+) efflux antiporter 3, chloroplastic [Source:UniProtKB/Swiss-Prot;Acc:Q9M0Z3]	Down

## Sheet: Genes related to hy5   
Genes show different tendencies of expression changes in hy5 mutant
ProbeID	Gene name	Gene descriptions	Up-Down-Regulation (WT-Dark/WT-Light)	Putative HY5 targets
AT1G03010		BTB/POZ domain-containing protein At1g03010 [Source:UniProtKB/Swiss-Prot;Acc:Q9SA69]	up	No
AT5G17720	BDG5	SIB1 [Source:UniProtKB/TrEMBL;Acc:A0A178VMX5]	up	No
AT1G01060	LHY	Probable LRR receptor-like serine/threonine-protein kinase At1g74360 [Source:UniProtKB/Swiss-Prot;Acc:C0LGJ1]	up	Yes
AT5G43520		Regulator of Vps4 activity in the MVB pathway protein [Source:UniProtKB/TrEMBL;Acc:F4ITF9]	up	No
AT1G16150	WAKL4	Protein NRT1/ PTR FAMILY 2.4 [Source:UniProtKB/Swiss-Prot;Acc:Q9M173]	up	No
AT2G46830	CCA1	Putative glucuronosyltransferase PGSIP8 [Source:UniProtKB/Swiss-Prot;Acc:Q8VZP6]	up	Yes
AT2G20100		F13F21.11 protein [Source:UniProtKB/TrEMBL;Acc:Q9XIB2]	up	Yes
AT4G08250	SCL26	Formate dehydrogenase, mitochondrial [Source:UniProtKB/TrEMBL;Acc:A0A178UHK7]	up	No
AT2G41240	BHLH100	Terpenoid synthase 25 [Source:UniProtKB/Swiss-Prot;Acc:Q9LIA1]	up	No
AT3G52970	CYP76G1	At3g57450 [Source:UniProtKB/TrEMBL;Acc:Q9SCM7]	up	No
AT2G27402		Protein SAR DEFICIENT 1 [Source:UniProtKB/Swiss-Prot;Acc:Q9C9T2]	up	No
AT1G58848	RF9	Solanesyl diphosphate synthase 3, chloroplastic/mitochondrial [Source:UniProtKB/Swiss-Prot;Acc:Q5HZ00]	down	No
AT5G41590		Cytochrome P450 71B12 [Source:UniProtKB/Swiss-Prot;Acc:Q9ZU07]	down	No
AT4G23260	CRK18	4-alpha-glucanotransferase DPE2 [Source:UniProtKB/Swiss-Prot;Acc:Q8RXD9]	down	No
AT3G52340	SPP2	NAD(P)-binding Rossmann-fold superfamily protein [Source:UniProtKB/TrEMBL;Acc:Q9SZ91]	down	Yes
AT4G12480	EARLI1	Probable aminotransferase TAT2 [Source:UniProtKB/Swiss-Prot;Acc:Q9FN30]	down	No
AT3G48700	CXE13	Acid phosphatase-like protein [Source:UniProtKB/TrEMBL;Acc:Q9M0F4]	down	No
AT3G08860	PYD4	Plastid transcriptionally active 3 [Source:UniProtKB/TrEMBL;Acc:F4J3M2]	down	No
AT4G24350		Photosystem I reaction center subunit VI-1, chloroplastic [Source:UniProtKB/Swiss-Prot;Acc:Q9SUI7]	down	No
Reference：Silva-Navas, J., M. A. Moreno-Risueno, C. Manzano, B. Tellez-Robledo, S. Navarro-Neila, V. Carrasco, S. Pollmann, F. J. Gallego and J. C. Del Pozo (2016). "Flavonols Mediate Root Phototropism and Growth through Regulation of Proliferation-to-Differentiation Transition." Plant Cell 28(6): 1372-1387.
Lee, J., K. He, V. Stolc, H. Lee, P. Figueroa, Y. Gao, W. Tongprasit, H. Y. Zhao, I. Lee and X. Deng (2007). "Analysis of transcription factor HY5 genomic binding sites revealed its hierarchical role in light regulation of development." Plant Cell 19(3): 731-749.
